# Supplementary material for: Differential gene expression and potential regulatory network of fatty acid biosynthesis during fruit and leaf development in yellowhorn (Xanthoceras sorbifolium), an oil-producing tree with significant deployment values
Source: Front Plant Sci. 2024 Jan 19;14:1297817. doi: 10.3389/fpls.2023.1297817 (PMC10834690; doi:10.3389/fpls.2023.1297817)
Supplement: Supplementary file 2 [file DataSheet_2.xlsx]

## Sheet: Supplementary Table 1
Supplementary Table 1. The core enzymatic genes for fatty acid biosynthesis.
Enzyme	Gene
ACCase	XS01G0315800, XS04G0025500, XS04G0266600, XS12G0058100, XSPtG0004100, XSUnG0096000, XSUnG0162000, XSUnG0182900
MCAT	XS13G0210400
KASⅢ	XS13G0053000
KAR	XS02G0269800, XS05G0108400, XS11G0049200, XS11G0049300, XS14G0011400
ENR	XS02G0157100, XS02G0157400, XS10G0027100, XSUnG0010800
KASⅠ	XS03G0306900, XS06G0019700, XSUnG0232000
KASⅡ	XS03G0306900, XS06G0019700, XSUnG0232000
SAD	XS03G0033600, XS03G0321200, XS03G0322000, XS03G0322100, XS03G0322200, XS06G0207700, XS06G0207800, XS06G0207900, XS06G0209900, XS07G0210900
FatA/B	XS01G0048200, XS01G0398400, XS04G0239300, XS05G0246600, XS09G0145900, XS05G0258500
LACS	XS01G0115500, XS01G0355300, XS02G0054100, XS03G0201900, XS03G0202000, XS05G0121900, XS07G0172100, XS09G0175500, XS13G0141400, XSUnG0123300, XS07G0052000
KCS	XS02G0044900, XS02G0203200, XS03G0170900, XS03G0219200, XS03G0301200, XS03G0329000, XS04G0262000, XS05G0006200, XS07G0040000, XS08G0168000, XS09G0078300, XS10G0140100, XS11G0171700, XS14G0050800, XS01G0341200, XS03G0218400, XS03G0218500, XS03G0261400, XS04G0241300, XS07G0052000
KCR	XS05G0102000, XS05G0102400, XS05G0102500, XS11G0198200, XS11G0198300, XS11G0198400, XS12G0041500, XS12G0041600, XS13G0137000, XS13G0203700, XS01G0341200, XS03G0218400, XS03G0218500, XS03G0261400, XS04G0241300
HCD	XS07G0012400, XS08G0243200, XS10G0136800, XS10G0154400, XS14G0043100, XS01G0341200, XS03G0218400, XS03G0218500, XS03G0261400, XS04G0241300
ECR	XS10G0145900, XS12G0043000, XS14G0065900, XS01G0341200, XS03G0218400, XS03G0218500, XS03G0261400, XS04G0241300
GPAT	XS01G0073600, XS01G0355700, XS01G0379500, XS02G0007000, XS05G0063500, XS07G0159700, XS12G0060700, XS12G0096600, XS14G0070900
LPAAT	XS02G0051900, XS06G0126000, XS07G0027700, XS07G0051900, XS09G0230700, XS11G0107800, XS15G0155200
PAP	XS01G0084000, XS05G0253600, XS05G0253700, XS05G0253800, XS07G0064100, XS08G0146400, XS11G0010500, XS12G0013000, XS12G0032400, XS12G0032500, XS12G0141000
DGAT	XS01G0180000, XS01G0180100, XS01G0181000, XS01G0181100, XS01G0181400, XS01G0212400, XS01G0349800, XS02G0073500, XS04G0003400, XS04G0169900, XS04G0203300, XS07G0282100, XS07G0282200, XS07G0282300, XS08G0099500, XS15G0034700, XS15G0053300, XSUnG0049200, XSUnG0067800, XS04G0199700, XSUnG0149500
PDAT	XS04G0199700, XSUnG0149500, XS01G0287400, XS03G0330000, XS08G0095000

## Sheet: Supplementary Table 2
Supplementary Table 2. Statistics of RNA-seq samples of fruit in yellowhorn.
Sample	SRR	BioProject	Bases (G)	Size (Gb)	Tissue	Time	Stage	Location
C9_1G	SRR13624939	PRJNA694500	7.3	2.7	fruit	20170506	1	China:Dadongliu, Changping District, Beijing, China
E2_1G	SRR13624887	PRJNA694500	6.1	2.3	fruit	20170506	1	China:Dadongliu, Changping District, Beijing, China
C9_2G	SRR13624937	PRJNA694500	6.6	2.5	fruit	20170510	2	China:Dadongliu, Changping District, Beijing, China
E2_2G	SRR13624886	PRJNA694500	6.7	2.5	fruit	20170510	2	China:Dadongliu, Changping District, Beijing, China
A0_3G	SRR13624927	PRJNA694500	6.2	2.3	fruit	20170518	3	China:Dadongliu, Changping District, Beijing, China
E2_3G	SRR13624885	PRJNA694500	7.4	2.7	fruit	20170518	3	China:Dadongliu, Changping District, Beijing, China
A0_4GR	SRR13624916	PRJNA694500	6.8	2.5	fruit	20170601	4	China:Dadongliu, Changping District, Beijing, China
C9_4GR	SRR13624935	PRJNA694500	6.4	2.4	fruit	20170601	4	China:Dadongliu, Changping District, Beijing, China
E2_4GR	SRR13624880	PRJNA694500	7.1	2.7	fruit	20170601	4	China:Dadongliu, Changping District, Beijing, China
A0_5GR	SRR13624881	PRJNA694500	6.3	2.4	fruit	20170613	5	China:Dadongliu, Changping District, Beijing, China
E2_5GR	SRR13624877	PRJNA694500	7.6	2.8	fruit	20170613	5	China:Dadongliu, Changping District, Beijing, China
E2_6GR	SRR13624875	PRJNA694500	6.8	2.6	fruit	20170710	6	China:Dadongliu, Changping District, Beijing, China

## Sheet: Supplementary Table 3
Supplementary Table 3. Statistics of RNA-seq samples of leaf in yellowhorn.
Sample	SRR	BioProject	Bases (G)	Size (Gb)	Tissue	Time	Stage	Location
A0_Y1_3	SRR13624946	PRJNA694500	6.6	2.5	leaf	20170418	1	China:Dadongliu, Changping District, Beijing, China
C9_Y1	SRR13624895	PRJNA694500	7.7	2.9	leaf	20170418	1	China:Dadongliu, Changping District, Beijing, China
C9_Y1_2	SRR13624893	PRJNA694500	5.6	2.2	leaf	20170418	1	China:Dadongliu, Changping District, Beijing, China
C9_Y1_3	SRR13624892	PRJNA694500	5.5	2.2	leaf	20170418	1	China:Dadongliu, Changping District, Beijing, China
E2_Y1	SRR13624842	PRJNA694500	10.4	4	leaf	20170418	1	China:Dadongliu, Changping District, Beijing, China
E2_Y1_3	SRR13624840	PRJNA694500	6.6	2.5	leaf	20170418	1	China:Dadongliu, Changping District, Beijing, China
JH_Y1	SRR13624983	PRJNA694500	8.2	3	leaf	20170418	1	China:Dadongliu, Changping District, Beijing, China
JH_Y1_3	SRR13624981	PRJNA694500	5.5	2.1	leaf	20170418	1	China:Dadongliu, Changping District, Beijing, China
E2_Y2_2	SRR13624838	PRJNA694500	10	3	leaf	20170424	2	China:Dadongliu, Changping District, Beijing, China
E2_Y2_3	SRR13624836	PRJNA694500	15.8	4.5	leaf	20170424	2	China:Dadongliu, Changping District, Beijing, China
A0_Y3	SRR13624945	PRJNA694500	6.3	2.3	leaf	20170427	3	China:Dadongliu, Changping District, Beijing, China
A0_Y3_2	SRR13624944	PRJNA694500	4.7	1.8	leaf	20170427	3	China:Dadongliu, Changping District, Beijing, China
A0_Y3_3	SRR13624943	PRJNA694500	16.2	4.7	leaf	20170427	3	China:Dadongliu, Changping District, Beijing, China
C9_Y3	SRR13624891	PRJNA694500	15.1	4.7	leaf	20170427	3	China:Dadongliu, Changping District, Beijing, China
C9_Y3_3	SRR13624889	PRJNA694500	5.4	2.1	leaf	20170427	3	China:Dadongliu, Changping District, Beijing, China
E2_Y3	SRR13624835	PRJNA694500	11.1	3.4	leaf	20170427	3	China:Dadongliu, Changping District, Beijing, China
E2_Y3_2	SRR13624834	PRJNA694500	5.6	2.3	leaf	20170427	3	China:Dadongliu, Changping District, Beijing, China
E2_Y3_3	SRR13624833	PRJNA694500	6.5	2.6	leaf	20170427	3	China:Dadongliu, Changping District, Beijing, China
A0_4Y	SRR13624905	PRJNA694500	6.7	2.7	leaf	20170506	4	China:Dadongliu, Changping District, Beijing, China
E2_4Y	SRR13624879	PRJNA694500	7	2.7	leaf	20170506	4	China:Dadongliu, Changping District, Beijing, China
JH_4Y	SRR13624831	PRJNA694500	7.6	2.9	leaf	20170506	4	China:Dadongliu, Changping District, Beijing, China
A0_5Y	SRR13624870	PRJNA694500	6.4	2.4	leaf	20170510	5	China:Dadongliu, Changping District, Beijing, China
E2_5Y	SRR13624876	PRJNA694500	6.9	2.7	leaf	20170510	5	China:Dadongliu, Changping District, Beijing, China
C9_6Y	SRR13624931	PRJNA694500	6.7	2.5	leaf	20170518	6	China:Dadongliu, Changping District, Beijing, China
E2_6Y	SRR13624874	PRJNA694500	7.1	2.7	leaf	20170518	6	China:Dadongliu, Changping District, Beijing, China
A0_7Y	SRR13624848	PRJNA694500	7	2.6	leaf	20170601	7	China:Dadongliu, Changping District, Beijing, China
C9_7Y	SRR13624930	PRJNA694500	5.4	2	leaf	20170601	7	China:Dadongliu, Changping District, Beijing, China
JH_7Y	SRR13624830	PRJNA694500	6.6	2.5	leaf	20170601	7	China:Dadongliu, Changping District, Beijing, China
A0_8Y	SRR13624837	PRJNA694500	6.7	2.5	leaf	20170613	8	China:Dadongliu, Changping District, Beijing, China
C9_8Y	SRR13624929	PRJNA694500	7	2.6	leaf	20170613	8	China:Dadongliu, Changping District, Beijing, China
E2_8Y	SRR13624872	PRJNA694500	8.5	3.2	leaf	20170613	8	China:Dadongliu, Changping District, Beijing, China
JH_8Y	SRR13624829	PRJNA694500	8.8	3.2	leaf	20170613	8	China:Dadongliu, Changping District, Beijing, China
E2_9Y	SRR13624871	PRJNA694500	7.1	2.7	leaf	20170710	9	China:Dadongliu, Changping District, Beijing, China
JH_9Y	SRR13624828	PRJNA694500	9.7	3.5	leaf	20170710	9	China:Dadongliu, Changping District, Beijing, China
A0_10Y	SRR13624949	PRJNA694500	6.7	2.5	leaf	20170930	10	China:Dadongliu, Changping District, Beijing, China
E2_10Y	SRR13624888	PRJNA694500	6.7	2.5	leaf	20170930	10	China:Dadongliu, Changping District, Beijing, China
JH_10Y	SRR13624832	PRJNA694500	6.9	2.6	leaf	20170930	10	China:Dadongliu, Changping District, Beijing, China

## Sheet: Supplementary Table 4
Supplementary Table 4. GO enrichment of genes specifically expressed in fruit.
GO	Description	GeneRatio	BgRatio	pvalue	p.adjust	qvalue	geneID	Count
GO:0080156	mitochondrial mRNA modification|BP	26/1733	91/17622	3.87604e-07	0.000822496	0.000801933	XS01G0317500/XS01G0389700/XS02G0092300/XS03G0177500/XS03G0216100/XS05G0020600/XS05G0033500/XS05G0169900/XS06G0164300/XS07G0028200/XS07G0205900/XS07G0265800/XS08G0084400/XS08G0225000/XS09G0172000/XS09G0226100/XS10G0005000/XS11G0170500/XS11G0211900/XS13G0057500/XS13G0194200/XS13G0236900/XSUnG0095300/XSUnG0132300/XSUnG0186400/XSUnG0207600	26
GO:1900864	mitochondrial RNA modification|BP	26/1733	91/17622	3.87604e-07	0.000822496	0.000801933	XS01G0317500/XS01G0389700/XS02G0092300/XS03G0177500/XS03G0216100/XS05G0020600/XS05G0033500/XS05G0169900/XS06G0164300/XS07G0028200/XS07G0205900/XS07G0265800/XS08G0084400/XS08G0225000/XS09G0172000/XS09G0226100/XS10G0005000/XS11G0170500/XS11G0211900/XS13G0057500/XS13G0194200/XS13G0236900/XSUnG0095300/XSUnG0132300/XSUnG0186400/XSUnG0207600	26
GO:0000959	mitochondrial RNA metabolic process|BP	26/1733	95/17622	9.67584e-07	0.00136881	0.00133459	XS01G0317500/XS01G0389700/XS02G0092300/XS03G0177500/XS03G0216100/XS05G0020600/XS05G0033500/XS05G0169900/XS06G0164300/XS07G0028200/XS07G0205900/XS07G0265800/XS08G0084400/XS08G0225000/XS09G0172000/XS09G0226100/XS10G0005000/XS11G0170500/XS11G0211900/XS13G0057500/XS13G0194200/XS13G0236900/XSUnG0095300/XSUnG0132300/XSUnG0186400/XSUnG0207600	26
GO:0009451	RNA modification|BP	64/1733	372/17622	6.30494e-06	0.00668955	0.0065223	XS01G0127400/XS01G0156600/XS01G0246900/XS01G0268300/XS01G0280800/XS01G0309200/XS01G0317500/XS01G0346600/XS01G0389700/XS02G0003300/XS02G0051600/XS02G0092300/XS03G0053100/XS03G0081500/XS03G0093400/XS03G0177500/XS03G0216100/XS03G0265500/XS03G0309300/XS03G0324200/XS04G0125500/XS04G0228200/XS04G0291800/XS05G0020600/XS05G0033500/XS05G0150600/XS05G0169900/XS05G0262000/XS06G0055700/XS06G0073900/XS06G0164…	64
GO:0043531	ADP binding|MF	43/1733	223/17622	1.24885e-05	0.0106003	0.0103353	XS02G0014000/XS02G0199400/XS02G0265500/XS02G0281100/XS02G0282200/XS02G0282300/XS02G0285800/XS03G0311400/XS03G0333700/XS04G0124600/XS04G0125500/XS05G0065100/XS05G0138300/XS05G0138400/XS05G0254500/XS05G0254600/XS05G0258300/XS06G0006500/XS07G0270700/XS07G0284500/XS08G0041700/XS09G0010300/XS09G0092900/XS09G0093100/XS09G0132200/XS09G0174000/XS09G0179000/XS09G0184600/XS09G0205100/XS09G0235500/XS09G0235…	43
GO:0006397	mRNA processing|BP	77/1733	496/17622	3.50318e-05	0.0247792	0.0241596	XS01G0034100/XS01G0112800/XS01G0126700/XS01G0156600/XS01G0201000/XS01G0233700/XS01G0280800/XS01G0356100/XS01G0389700/XS02G0280400/XS03G0053100/XS03G0084200/XS03G0093400/XS03G0095800/XS03G0171300/XS03G0177500/XS03G0179800/XS03G0255900/XS03G0256500/XS03G0258100/XS03G0309300/XS04G0172600/XS04G0211300/XS04G0231300/XS04G0290100/XS05G0020600/XS05G0033500/XS05G0153400/XS05G0176000/XS06G0017900/XS06G0055…	77
GO:0010421	hydrogen peroxide-mediated programmed cell death|BP	11/1733	29/17622	5.21395e-05	0.02766	0.0269685	XS08G0024700/XS10G0009200/XS10G0009300/XS10G0009400/XS10G0114900/XS11G0222000/XS11G0222100/XS11G0222300/XS11G0222500/XS11G0222700/XS15G0107100	11
GO:0036474	cell death in response to hydrogen peroxide|BP	11/1733	29/17622	5.21395e-05	0.02766	0.0269685	XS08G0024700/XS10G0009200/XS10G0009300/XS10G0009400/XS10G0114900/XS11G0222000/XS11G0222100/XS11G0222300/XS11G0222500/XS11G0222700/XS15G0107100	11
GO:0005506	iron ion binding|MF	75/1733	495/17622	9.8534e-05	0.0464643	0.0453026	XS01G0005700/XS01G0158100/XS01G0238500/XS01G0281900/XS01G0348200/XS01G0385100/XS02G0029100/XS02G0053300/XS02G0256300/XS02G0273900/XS03G0146800/XS03G0187400/XS04G0059900/XS04G0060300/XS04G0154300/XS04G0194000/XS04G0239900/XS05G0004000/XS05G0024000/XS05G0026200/XS05G0040700/XS05G0174500/XS05G0246100/XS06G0028000/XS06G0028300/XS06G0029000/XS07G0055300/XS07G0081600/XS07G0207200/XS07G0210600/XS07G0212…	75
GO:0009932	cell tip growth|BP	48/1733	283/17622	0.000124199	0.0527101	0.0513923	XS01G0210700/XS01G0246900/XS01G0286400/XS01G0295400/XS01G0295500/XS01G0387700/XS02G0051600/XS02G0125000/XS03G0010800/XS03G0074100/XS03G0283800/XS03G0285100/XS03G0308500/XS03G0338400/XS04G0060600/XS04G0171300/XS04G0235600/XS04G0248800/XS04G0281700/XS05G0025000/XS05G0152200/XS05G0156200/XS05G0197900/XS06G0014800/XS06G0084500/XS06G0126100/XS07G0021000/XS07G0109900/XS07G0118200/XS07G0269800/XS08G0076…	48
GO:0000956	nuclear-transcribed mRNA catabolic process|BP	30/1733	152/17622	0.000158743	0.0570618	0.0556352	XS01G0025400/XS01G0232100/XS01G0238200/XS01G0303600/XS01G0370100/XS01G0401400/XS02G0225700/XS02G0226100/XS04G0098100/XS04G0128100/XS04G0172600/XS04G0290100/XS05G0176000/XS05G0177900/XS07G0297400/XS10G0177400/XS10G0180400/XS11G0028400/XS11G0221900/XS12G0035200/XS12G0037900/XS12G0115000/XS12G0138800/XS12G0197400/XS12G0252600/XS13G0081400/XS13G0114100/XS13G0195200/XS14G0121300/XSUnG0181100	30
GO:0031425	chloroplast RNA processing|BP	17/1733	66/17622	0.000161343	0.0570618	0.0556352	XS01G0201000/XS01G0389700/XS03G0053100/XS03G0093400/XS03G0258100/XS04G0287900/XS05G0020600/XS06G0055700/XS06G0073900/XS07G0205800/XS08G0170600/XS11G0114500/XS14G0086600/XS15G0021500/XSUnG0095300/XSUnG0124000/XSUnG0154900	17
GO:0009756	carbohydrate mediated signaling|BP	25/1733	120/17622	0.000227657	0.0637914	0.0621965	XS01G0363800/XS01G0401400/XS02G0092300/XS03G0171300/XS04G0260000/XS05G0020600/XS05G0177900/XS06G0030000/XS06G0114900/XS07G0028200/XS08G0084400/XS09G0026800/XS09G0226100/XS09G0231000/XS11G0221900/XS12G0010300/XS12G0068800/XS12G0105000/XS12G0116600/XS12G0138800/XS12G0233500/XS13G0236900/XS14G0121300/XS15G0168600/XSUnG0207600	25
GO:0010182	sugar mediated signaling pathway|BP	25/1733	120/17622	0.000227657	0.0637914	0.0621965	XS01G0363800/XS01G0401400/XS02G0092300/XS03G0171300/XS04G0260000/XS05G0020600/XS05G0177900/XS06G0030000/XS06G0114900/XS07G0028200/XS08G0084400/XS09G0026800/XS09G0226100/XS09G0231000/XS11G0221900/XS12G0010300/XS12G0068800/XS12G0105000/XS12G0116600/XS12G0138800/XS12G0233500/XS13G0236900/XS14G0121300/XS15G0168600/XSUnG0207600	25
GO:0009846	pollen germination|BP	18/1733	74/17622	0.000229284	0.0637914	0.0621965	XS01G0044700/XS01G0332900/XS01G0387700/XS03G0308500/XS04G0060600/XS04G0221500/XS04G0235600/XS04G0281700/XS05G0037400/XS05G0197900/XS06G0262800/XS07G0248900/XS08G0076800/XS11G0055300/XS12G0233900/XS13G0134900/XS14G0039800/XS15G0172600	18
GO:0009699	phenylpropanoid biosynthetic process|BP	47/1733	283/17622	0.000240495	0.0637914	0.0621965	XS01G0172000/XS01G0190000/XS01G0200000/XS01G0210700/XS01G0215200/XS01G0343700/XS01G0345800/XS01G0397000/XS02G0029100/XS02G0064900/XS03G0151600/XS04G0137400/XS04G0216000/XS05G0004000/XS05G0040700/XS05G0089600/XS05G0121900/XS05G0152200/XS06G0180300/XS07G0262200/XS07G0266600/XS08G0038200/XS08G0051300/XS08G0181800/XS10G0009200/XS10G0009300/XS10G0009400/XS10G0088100/XS10G0114900/XS10G0193200/XS11G0021…	47
GO:0009698	phenylpropanoid metabolic process|BP	55/1733	350/17622	0.000321917	0.0803656	0.0783563	XS01G0172000/XS01G0172500/XS01G0190000/XS01G0200000/XS01G0210700/XS01G0215200/XS01G0343700/XS01G0345800/XS01G0397000/XS02G0029100/XS02G0064900/XS03G0151600/XS04G0137400/XS04G0216000/XS04G0251100/XS05G0004000/XS05G0040700/XS05G0089600/XS05G0121900/XS05G0152200/XS06G0180300/XS07G0262200/XS07G0266600/XS08G0038200/XS08G0051300/XS08G0181800/XS10G0009200/XS10G0009300/XS10G0009400/XS10G0088100/XS10G0114…	55
GO:0071322	cellular response to carbohydrate stimulus|BP	27/1733	138/17622	0.000382061	0.0900816	0.0878294	XS01G0275200/XS01G0363800/XS01G0401400/XS02G0092300/XS03G0171300/XS04G0260000/XS05G0020600/XS05G0177900/XS06G0030000/XS06G0114900/XS07G0028200/XS08G0084400/XS09G0026800/XS09G0226100/XS09G0231000/XS11G0221900/XS12G0010300/XS12G0068800/XS12G0105000/XS12G0116600/XS12G0138800/XS12G0233500/XS13G0236900/XS14G0018600/XS14G0121300/XS15G0168600/XSUnG0207600	27
GO:0010087	phloem or xylem histogenesis|BP	30/1733	161/17622	0.000448066	0.100084	0.0975817	XS01G0127400/XS01G0200000/XS01G0233700/XS01G0280600/XS02G0044300/XS03G0151600/XS03G0309300/XS05G0010200/XS05G0033500/XS05G0037400/XS05G0069800/XS05G0164000/XS05G0264100/XS05G0265400/XS05G0265800/XS06G0151600/XS07G0096100/XS10G0157800/XS11G0170500/XS11G0223900/XS12G0102200/XS12G0233900/XS13G0015400/XS13G0042100/XS13G0052100/XS13G0057500/XS13G0200100/XS14G0071700/XS14G0076100/XS14G0076600	30
GO:0003724	RNA helicase activity|MF	19/1733	86/17622	0.000578105	0.118356	0.115397	XS01G0233700/XS01G0238200/XS01G0370100/XS01G0401400/XS02G0067500/XS02G0225700/XS02G0226100/XS03G0199600/XS03G0256500/XS05G0176000/XS05G0177900/XS10G0053100/XS12G0126900/XS13G0000800/XS13G0021100/XS13G0055500/XS14G0121300/XSUnG0126600/XSUnG0181100	19
GO:0009826	unidimensional cell growth|BP	71/1733	491/17622	0.000593321	0.118356	0.115397	XS01G0210700/XS01G0246900/XS01G0286400/XS01G0295400/XS01G0295500/XS01G0387700/XS02G0007300/XS02G0047000/XS02G0051600/XS02G0125000/XS02G0192000/XS03G0010800/XS03G0074100/XS03G0212600/XS03G0283800/XS03G0285100/XS03G0308500/XS03G0338400/XS04G0060600/XS04G0162400/XS04G0171300/XS04G0172600/XS04G0235600/XS04G0248800/XS04G0262000/XS04G0281700/XS05G0025000/XS05G0037400/XS05G0152200/XS05G0156200/XS05G0197…	71
GO:0097468	programmed cell death in response to reactive oxygen species|BP	11/1733	37/17622	0.000615542	0.118356	0.115397	XS08G0024700/XS10G0009200/XS10G0009300/XS10G0009400/XS10G0114900/XS11G0222000/XS11G0222100/XS11G0222300/XS11G0222500/XS11G0222700/XS15G0107100	11
GO:0042623	ATPase activity, coupled|MF	67/1733	459/17622	0.000647255	0.118356	0.115397	XS01G0001900/XS01G0210700/XS01G0233700/XS01G0238200/XS01G0286600/XS01G0346600/XS01G0370100/XS01G0377100/XS01G0401400/XS02G0067500/XS02G0224800/XS02G0225700/XS02G0226100/XS03G0199600/XS03G0215200/XS03G0215400/XS03G0247200/XS03G0256500/XS03G0262100/XS03G0276500/XS04G0268300/XS04G0286900/XS05G0101200/XS05G0176000/XS05G0177900/XS05G0183500/XS05G0240900/XS06G0026500/XS06G0027200/XS06G0072700/XS06G0076…	67
GO:0048588	developmental cell growth|BP	53/1733	345/17622	0.000706657	0.118356	0.115397	XS01G0246900/XS01G0286400/XS01G0295400/XS01G0295500/XS01G0387700/XS02G0036200/XS02G0051600/XS02G0138200/XS02G0225700/XS02G0226100/XS03G0010800/XS03G0074100/XS03G0144400/XS03G0261000/XS03G0308500/XS03G0338400/XS04G0060600/XS04G0171300/XS04G0235600/XS04G0242400/XS04G0248800/XS04G0267600/XS04G0281700/XS05G0025000/XS05G0152200/XS05G0156200/XS05G0197900/XS05G0240000/XS06G0014800/XS06G0027200/XS06G0084…	53
GO:0009804	coumarin metabolic process|BP	11/1733	38/17622	0.00079021	0.118356	0.115397	XS04G0137400/XS08G0181800/XS10G0009200/XS10G0009300/XS10G0009400/XS10G0114900/XS11G0222000/XS11G0222100/XS11G0222300/XS11G0222500/XS11G0222700	11
GO:0009805	coumarin biosynthetic process|BP	11/1733	38/17622	0.00079021	0.118356	0.115397	XS04G0137400/XS08G0181800/XS10G0009200/XS10G0009300/XS10G0009400/XS10G0114900/XS11G0222000/XS11G0222100/XS11G0222300/XS11G0222500/XS11G0222700	11
GO:0016556	mRNA modification|BP	29/1733	159/17622	0.000791397	0.118356	0.115397	XS01G0317500/XS01G0389700/XS02G0092300/XS03G0177500/XS03G0216100/XS05G0020600/XS05G0033500/XS05G0169900/XS06G0055700/XS06G0164300/XS07G0028200/XS07G0205900/XS07G0265800/XS08G0084400/XS08G0225000/XS09G0172000/XS09G0226100/XS10G0005000/XS11G0170500/XS11G0211900/XS12G0042400/XS13G0057500/XS13G0194200/XS13G0236900/XSUnG0095300/XSUnG0132300/XSUnG0164300/XSUnG0186400/XSUnG0207600	29
GO:0015662	ATPase activity, coupled to transmembrane movement of ions, phosphorylative mechanism|MF	13/1733	50/17622	0.000842815	0.118356	0.115397	XS03G0215200/XS03G0215400/XS03G0262100/XS04G0268300/XS04G0286900/XS06G0115500/XS07G0086500/XS08G0246100/XS09G0003700/XS09G0168000/XS13G0062200/XSUnG0029800/XSUnG0101700	13
GO:0004004	ATP-dependent RNA helicase activity|MF	18/1733	82/17622	0.000864524	0.118356	0.115397	XS01G0233700/XS01G0238200/XS01G0370100/XS01G0401400/XS02G0225700/XS02G0226100/XS03G0199600/XS03G0256500/XS05G0176000/XS05G0177900/XS10G0053100/XS12G0126900/XS13G0000800/XS13G0021100/XS13G0055500/XS14G0121300/XSUnG0126600/XSUnG0181100	18
GO:0008186	RNA-dependent ATPase activity|MF	18/1733	82/17622	0.000864524	0.118356	0.115397	XS01G0233700/XS01G0238200/XS01G0370100/XS01G0401400/XS02G0225700/XS02G0226100/XS03G0199600/XS03G0256500/XS05G0176000/XS05G0177900/XS10G0053100/XS12G0126900/XS13G0000800/XS13G0021100/XS13G0055500/XS14G0121300/XSUnG0126600/XSUnG0181100	18
GO:0036473	cell death in response to oxidative stress|BP	11/1733	39/17622	0.00100404	0.133161	0.129832	XS08G0024700/XS10G0009200/XS10G0009300/XS10G0009400/XS10G0114900/XS11G0222000/XS11G0222100/XS11G0222300/XS11G0222500/XS11G0222700/XS15G0107100	11
GO:0030029	actin filament-based process|BP	33/1733	192/17622	0.0010532	0.135448	0.132062	XS01G0125000/XS01G0152600/XS01G0215300/XS01G0286400/XS01G0316200/XS01G0347500/XS02G0138200/XS02G0265500/XS02G0288900/XS03G0074100/XS03G0126800/XS03G0188900/XS04G0080700/XS04G0260000/XS05G0240000/XS06G0079900/XS06G0225000/XS07G0028200/XS07G0071700/XS08G0007000/XS09G0224200/XS10G0103200/XS10G0134600/XS11G0077900/XS12G0010300/XS12G0065200/XS12G0230600/XS13G0042100/XS14G0121300/XS15G0024400/XS15G0107…	33
GO:0000904	cell morphogenesis involved in differentiation|BP	61/1733	419/17622	0.00117843	0.147096	0.143419	XS01G0215300/XS01G0219700/XS01G0246900/XS01G0286400/XS01G0295400/XS01G0295500/XS01G0347500/XS01G0387700/XS02G0051600/XS02G0138200/XS02G0225700/XS02G0226100/XS02G0264100/XS02G0288900/XS03G0010800/XS03G0074100/XS03G0126800/XS03G0172900/XS03G0212600/XS03G0308500/XS04G0060600/XS04G0120000/XS04G0171300/XS04G0235600/XS04G0248800/XS04G0267600/XS04G0281700/XS05G0025000/XS05G0069800/XS05G0156200/XS05G0197…	61
GO:0044242	cellular lipid catabolic process|BP	31/1733	180/17622	0.00142012	0.165584	0.161444	XS01G0005700/XS01G0304100/XS01G0348200/XS01G0377100/XS02G0036200/XS02G0256300/XS03G0021400/XS03G0060500/XS03G0132100/XS03G0146800/XS03G0283800/XS03G0285100/XS04G0079500/XS04G0152000/XS04G0190300/XS04G0191000/XS04G0221500/XS05G0024000/XS05G0151500/XS06G0014000/XS06G0235800/XS07G0221900/XS07G0248200/XS08G0004400/XS08G0037900/XS09G0007400/XS09G0119700/XS11G0084200/XS12G0134500/XS12G0135800/XSUnG0139…	31
GO:0030036	actin cytoskeleton organization|BP	29/1733	165/17622	0.00144359	0.165584	0.161444	XS01G0125000/XS01G0152600/XS01G0215300/XS01G0286400/XS01G0316200/XS01G0347500/XS02G0138200/XS02G0265500/XS02G0288900/XS03G0126800/XS04G0080700/XS04G0260000/XS05G0240000/XS06G0079900/XS06G0225000/XS07G0028200/XS07G0071700/XS08G0007000/XS10G0103200/XS10G0134600/XS11G0077900/XS12G0010300/XS12G0065200/XS12G0230600/XS13G0042100/XS14G0121300/XS15G0107100/XSUnG0056900/XSUnG0141200	29
GO:0003697	single-stranded DNA binding|MF	14/1733	60/17622	0.00169815	0.184794	0.180174	XS01G0377400/XS03G0114800/XS03G0256500/XS03G0269900/XS07G0058600/XS08G0223500/XS09G0222100/XS11G0025500/XS11G0216800/XS12G0247800/XS13G0114100/XS14G0061000/XS15G0056000/XSUnG0224300	14
GO:0006402	mRNA catabolic process|BP	31/1733	184/17622	0.00203283	0.207317	0.202133	XS01G0025400/XS01G0232100/XS01G0233700/XS01G0238200/XS01G0303600/XS01G0370100/XS01G0401400/XS02G0225700/XS02G0226100/XS04G0098100/XS04G0128100/XS04G0172600/XS04G0290100/XS05G0176000/XS05G0177900/XS07G0297400/XS10G0177400/XS10G0180400/XS11G0028400/XS11G0221900/XS12G0035200/XS12G0037900/XS12G0115000/XS12G0138800/XS12G0197400/XS12G0252600/XS13G0081400/XS13G0114100/XS13G0195200/XS14G0121300/XSUnG0181…	31
GO:0031418	L-ascorbic acid binding|MF	15/1733	68/17622	0.00214756	0.207317	0.202133	XS01G0281900/XS03G0187400/XS05G0246100/XS06G0029000/XS10G0009200/XS10G0009300/XS10G0009400/XS10G0114900/XS11G0178900/XS11G0222000/XS11G0222100/XS11G0222300/XS11G0222500/XS11G0222700/XS13G0020800	15
GO:0008026	ATP-dependent helicase activity|MF	22/1733	117/17622	0.00216578	0.207317	0.202133	XS01G0233700/XS01G0238200/XS01G0370100/XS01G0401400/XS02G0225700/XS02G0226100/XS03G0199600/XS03G0247200/XS03G0256500/XS05G0176000/XS05G0177900/XS05G0183500/XS06G0076200/XS10G0053100/XS12G0126900/XS13G0000800/XS13G0021100/XS13G0055500/XS14G0121300/XSUnG0126600/XSUnG0162800/XSUnG0181100	22
GO:0070035	purine NTP-dependent helicase activity|MF	22/1733	117/17622	0.00216578	0.207317	0.202133	XS01G0233700/XS01G0238200/XS01G0370100/XS01G0401400/XS02G0225700/XS02G0226100/XS03G0199600/XS03G0247200/XS03G0256500/XS05G0176000/XS05G0177900/XS05G0183500/XS06G0076200/XS10G0053100/XS12G0126900/XS13G0000800/XS13G0021100/XS13G0055500/XS14G0121300/XSUnG0126600/XSUnG0162800/XSUnG0181100	22
GO:0048193	Golgi vesicle transport|BP	38/1733	240/17622	0.00219822	0.207317	0.202133	XS01G0000500/XS01G0190600/XS01G0210700/XS01G0232100/XS01G0300800/XS02G0166300/XS02G0264100/XS03G0132100/XS03G0283800/XS03G0285100/XS04G0028900/XS04G0046100/XS04G0221500/XS05G0019300/XS05G0037400/XS05G0208100/XS06G0120300/XS08G0092200/XS08G0093800/XS08G0256000/XS09G0003000/XS09G0181300/XS10G0003900/XS10G0154800/XS10G0156700/XS10G0198800/XS11G0192000/XS12G0001900/XS12G0233900/XS12G0254800/XS13G0012…	38
GO:0004386	helicase activity|MF	33/1733	201/17622	0.00229754	0.211973	0.206673	XS01G0000700/XS01G0233700/XS01G0236700/XS01G0238200/XS01G0370100/XS01G0401400/XS02G0067500/XS02G0174400/XS02G0225700/XS02G0226100/XS03G0199600/XS03G0247200/XS03G0256500/XS03G0291600/XS04G0203000/XS05G0176000/XS05G0177900/XS05G0183500/XS06G0076200/XS06G0114900/XS09G0036900/XS10G0053100/XS10G0166400/XS11G0047800/XS12G0126900/XS12G0141200/XS13G0000800/XS13G0021100/XS13G0055500/XS14G0121300/XSUnG0126…	33
GO:0009856	pollination|BP	60/1733	423/17622	0.00238889	0.215712	0.210319	XS01G0044700/XS01G0155900/XS01G0176500/XS01G0246900/XS01G0286400/XS01G0332900/XS01G0387700/XS02G0051600/XS03G0010800/XS03G0255900/XS03G0308500/XS04G0060600/XS04G0119600/XS04G0162400/XS04G0171300/XS04G0221500/XS04G0235600/XS04G0243900/XS04G0248800/XS04G0281700/XS05G0025000/XS05G0037400/XS05G0156200/XS05G0176000/XS05G0197900/XS06G0032800/XS06G0084500/XS06G0126100/XS06G0262800/XS07G0044800/XS07G0109…	60
GO:0005813	centrosome|CC	17/1733	83/17622	0.00262467	0.232065	0.226263	XS01G0053300/XS01G0233700/XS01G0330000/XS02G0192000/XS03G0172900/XS03G0247200/XS03G0271500/XS04G0203500/XS06G0003300/XS08G0154400/XS12G0176600/XS12G0208900/XS13G0154000/XS13G0263200/XS14G0018600/XS14G0024000/XS15G0107100	17
GO:0048868	pollen tube development|BP	40/1733	259/17622	0.00271628	0.232582	0.226767	XS01G0176500/XS01G0246900/XS01G0286400/XS01G0387700/XS02G0051600/XS03G0010800/XS03G0308500/XS04G0060600/XS04G0119600/XS04G0171300/XS04G0235600/XS04G0248800/XS04G0281700/XS05G0025000/XS05G0156200/XS05G0176000/XS05G0197900/XS06G0084500/XS06G0126100/XS07G0044800/XS07G0109900/XS07G0118200/XS07G0269800/XS08G0076800/XS09G0030500/XS09G0031900/XS09G0036900/XS10G0039200/XS10G0097800/XS11G0055300/XS11G0158…	40
GO:0010638	positive regulation of organelle organization|BP	36/1733	227/17622	0.00274823	0.232582	0.226767	XS01G0025400/XS01G0126700/XS01G0152600/XS01G0215300/XS01G0219700/XS01G0301300/XS01G0347500/XS02G0192000/XS02G0225700/XS02G0226100/XS02G0288900/XS03G0106400/XS03G0126800/XS04G0080700/XS04G0153300/XS05G0030300/XS05G0081400/XS05G0103600/XS05G0109700/XS05G0240000/XS06G0079900/XS06G0225000/XS07G0001900/XS08G0115900/XS08G0154400/XS10G0144500/XS11G0028400/XS11G0077900/XS12G0197400/XS12G0237700/XS13G0042…	36
GO:0010089	xylem development|BP	21/1733	112/17622	0.00279492	0.232582	0.226767	XS01G0200000/XS01G0280600/XS03G0151600/XS05G0010200/XS05G0069800/XS05G0164000/XS05G0264100/XS05G0265400/XS05G0265800/XS06G0151600/XS07G0096100/XS10G0157800/XS11G0223900/XS12G0102200/XS13G0015400/XS13G0042100/XS13G0052100/XS13G0200100/XS14G0071700/XS14G0076100/XS14G0076600	21
GO:0051235	maintenance of location|BP	22/1733	121/17622	0.00334085	0.272665	0.265848	XS01G0388800/XS04G0221500/XS05G0142100/XS05G0247200/XS06G0079900/XS06G0084500/XS06G0114900/XS07G0071700/XS08G0154400/XS09G0026800/XS09G0231000/XS11G0011100/XS12G0068800/XS12G0105000/XS12G0116600/XS13G0090000/XS14G0024000/XS14G0121300/XS15G0168100/XSUnG0126200/XSUnG0139600/XSUnG0149500	22
GO:0043021	ribonucleoprotein complex binding|MF	13/1733	58/17622	0.00357166	0.276714	0.269796	XS01G0391700/XS02G0126100/XS02G0225700/XS02G0226100/XS05G0176000/XS05G0177900/XS06G0003300/XS08G0019300/XS08G0251800/XS10G0097900/XS11G0012500/XS12G0126900/XSUnG0181100	13
GO:0044877	protein-containing complex binding|MF	26/1733	152/17622	0.0036223	0.276714	0.269796	XS01G0316200/XS01G0351700/XS01G0391700/XS02G0126100/XS02G0225700/XS02G0226100/XS03G0000500/XS03G0322500/XS04G0080700/XS05G0007100/XS05G0030300/XS05G0176000/XS05G0177900/XS05G0197900/XS05G0240000/XS06G0003300/XS08G0019300/XS08G0251800/XS10G0097900/XS11G0012500/XS11G0055300/XS11G0077900/XS12G0126900/XS12G0230600/XSUnG0181100/XSUnG0222200	26
GO:0051213	dioxygenase activity|MF	36/1733	232/17622	0.00396852	0.288371	0.281162	XS01G0246900/XS01G0281900/XS03G0065800/XS03G0146800/XS03G0187400/XS03G0315700/XS04G0154300/XS04G0239900/XS05G0120500/XS05G0151500/XS05G0246100/XS06G0028000/XS06G0028300/XS06G0029000/XS06G0048000/XS09G0141300/XS10G0009200/XS10G0009300/XS10G0009400/XS10G0029800/XS10G0030000/XS10G0030100/XS10G0114900/XS11G0178900/XS11G0222000/XS11G0222100/XS11G0222300/XS11G0222500/XS11G0222700/XS12G0102200/XS13G0020…	36
GO:0009860	pollen tube growth|BP	32/1733	202/17622	0.00464332	0.310049	0.302297	XS01G0246900/XS01G0286400/XS01G0387700/XS02G0051600/XS03G0010800/XS03G0308500/XS04G0060600/XS04G0171300/XS04G0235600/XS04G0248800/XS04G0281700/XS05G0025000/XS05G0156200/XS05G0197900/XS06G0084500/XS06G0126100/XS07G0109900/XS07G0118200/XS07G0269800/XS08G0076800/XS09G0030500/XS09G0031900/XS10G0039200/XS10G0097800/XS11G0055300/XS11G0158300/XS12G0147900/XS12G0230600/XS14G0039800/XSUnG0056900/XSUnG0162…	32
GO:0007033	vacuole organization|BP	19/1733	102/17622	0.00466468	0.310049	0.302297	XS01G0133200/XS01G0210700/XS01G0232100/XS01G0245200/XS01G0300800/XS01G0332900/XS02G0047100/XS02G0264100/XS03G0203000/XS04G0260000/XS04G0276200/XS05G0081400/XS05G0240000/XS06G0120300/XS08G0046900/XS11G0041900/XS12G0010300/XS12G0051200/XS13G0263200	19
GO:0004497	monooxygenase activity|MF	55/1733	393/17622	0.00468986	0.310049	0.302297	XS01G0005700/XS01G0172500/XS01G0334400/XS01G0348200/XS01G0385100/XS02G0006100/XS02G0006600/XS02G0029100/XS02G0117100/XS02G0256300/XS02G0273900/XS04G0059900/XS04G0060300/XS04G0151800/XS04G0194000/XS04G0233700/XS05G0004000/XS05G0024000/XS05G0026200/XS05G0040700/XS05G0121900/XS06G0002600/XS07G0055300/XS07G0081600/XS07G0207200/XS07G0210600/XS07G0221900/XS07G0267000/XS07G0269300/XS08G0021500/XS08G0021…	55
GO:0070301	cellular response to hydrogen peroxide|BP	13/1733	60/17622	0.00486288	0.310049	0.302297	XS08G0024700/XS08G0047600/XS10G0009200/XS10G0009300/XS10G0009400/XS10G0114900/XS11G0222000/XS11G0222100/XS11G0222300/XS11G0222500/XS11G0222700/XS13G0083400/XS15G0107100	13
GO:0005802	trans-Golgi network|CC	49/1733	343/17622	0.00493643	0.310049	0.302297	XS01G0112300/XS01G0168100/XS01G0231300/XS01G0245200/XS01G0300800/XS01G0332500/XS02G0019600/XS02G0125000/XS02G0264100/XS02G0268700/XS03G0187400/XS03G0243700/XS03G0252100/XS03G0257300/XS03G0283800/XS03G0285100/XS03G0288100/XS03G0303300/XS04G0104700/XS04G0171300/XS04G0228900/XS04G0260000/XS05G0037400/XS05G0039100/XS05G0049200/XS05G0063200/XS05G0095200/XS05G0140300/XS05G0152200/XS05G0208100/XS06G0084…	49
GO:0098657	import into cell|BP	30/1733	187/17622	0.00498573	0.310049	0.302297	XS01G0336100/XS02G0047100/XS02G0138200/XS02G0174400/XS02G0264100/XS03G0203000/XS03G0271500/XS03G0277600/XS04G0203500/XS04G0260000/XS04G0276200/XS05G0037400/XS05G0081400/XS05G0162800/XS05G0195200/XS05G0240000/XS05G0265400/XS06G0045400/XS06G0079900/XS07G0058300/XS07G0267600/XS09G0162300/XS11G0055300/XS12G0010300/XS12G0042400/XS12G0230600/XS12G0233900/XS12G0254800/XS14G0024000/XS14G0108100	30
GO:0000932	P-body|CC	11/1733	47/17622	0.00502058	0.310049	0.302297	XS01G0025400/XS01G0401400/XS04G0128100/XS04G0172600/XS04G0290100/XS05G0177900/XS11G0216800/XS12G0197400/XS12G0252600/XS13G0114100/XSUnG0181100	11
GO:0016553	base conversion or substitution editing|BP	11/1733	47/17622	0.00502058	0.310049	0.302297	XS01G0317500/XS01G0389700/XS03G0081500/XS03G0177500/XS09G0172000/XS11G0170500/XS11G0211900/XS13G0057500/XS13G0083800/XS14G0086600/XSUnG0186400	11
GO:0070603	SWI/SNF superfamily-type complex|CC	11/1733	47/17622	0.00502058	0.310049	0.302297	XS01G0219700/XS02G0047200/XS02G0174400/XS03G0247200/XS03G0322500/XS05G0183500/XS10G0166400/XS12G0014300/XS12G0014500/XS13G0012800/XS14G0069500	11
GO:0044706	multi-multicellular organism process|BP	61/1733	446/17622	0.00505377	0.310049	0.302297	XS01G0044700/XS01G0155900/XS01G0176500/XS01G0246900/XS01G0286400/XS01G0332900/XS01G0387700/XS02G0051600/XS03G0010800/XS03G0203000/XS03G0255900/XS03G0308500/XS04G0060600/XS04G0119600/XS04G0162400/XS04G0171300/XS04G0221500/XS04G0235600/XS04G0243900/XS04G0248800/XS04G0281700/XS05G0025000/XS05G0037400/XS05G0156200/XS05G0176000/XS05G0197900/XS06G0032800/XS06G0084500/XS06G0126100/XS06G0262800/XS07G0044…	61
GO:0051130	positive regulation of cellular component organization|BP	41/1733	277/17622	0.00521734	0.310049	0.302297	XS01G0025400/XS01G0126700/XS01G0152600/XS01G0215300/XS01G0219700/XS01G0301300/XS01G0347500/XS02G0192000/XS02G0225700/XS02G0226100/XS02G0265500/XS02G0288900/XS03G0106400/XS03G0126800/XS04G0080700/XS04G0153300/XS05G0030300/XS05G0081400/XS05G0103600/XS05G0109700/XS05G0240000/XS06G0079900/XS06G0225000/XS07G0001900/XS07G0071700/XS08G0115900/XS08G0154400/XS10G0144500/XS11G0028400/XS11G0077900/XS12G0197…	41
GO:0044089	positive regulation of cellular component biogenesis|BP	21/1733	118/17622	0.00527765	0.310049	0.302297	XS01G0025400/XS01G0152600/XS01G0215300/XS01G0219700/XS01G0347500/XS02G0225700/XS02G0226100/XS02G0265500/XS02G0288900/XS03G0126800/XS04G0080700/XS05G0240000/XS06G0079900/XS06G0225000/XS08G0154400/XS11G0077900/XS12G0197400/XS13G0042100/XS13G0052100/XS14G0024000/XS14G0121300	21
GO:0006401	RNA catabolic process|BP	34/1733	220/17622	0.0053433	0.310049	0.302297	XS01G0025400/XS01G0232100/XS01G0233700/XS01G0238200/XS01G0303600/XS01G0370100/XS01G0401400/XS02G0225700/XS02G0226100/XS03G0199600/XS04G0098100/XS04G0128100/XS04G0172600/XS04G0290100/XS05G0176000/XS05G0177900/XS07G0114100/XS07G0297400/XS10G0177400/XS10G0180400/XS11G0028400/XS11G0221900/XS12G0035200/XS12G0037900/XS12G0115000/XS12G0138800/XS12G0197400/XS12G0252600/XS13G0081400/XS13G0083800/XS13G0114…	34
GO:0045488	pectin metabolic process|BP	30/1733	188/17622	0.00538924	0.310049	0.302297	XS01G0168100/XS01G0215200/XS01G0244900/XS01G0257500/XS01G0297700/XS01G0297800/XS01G0351700/XS01G0397000/XS03G0000500/XS03G0057600/XS03G0168500/XS03G0188900/XS03G0288100/XS03G0303100/XS03G0303300/XS03G0318000/XS03G0328000/XS04G0104700/XS04G0228900/XS05G0058900/XS05G0083300/XS05G0151100/XS06G0225600/XS07G0175500/XS11G0154600/XS12G0101200/XS13G0005700/XS13G0134900/XSUnG0176100/XSUnG0222200	30
GO:0010345	suberin biosynthetic process|BP	12/1733	54/17622	0.00540613	0.310049	0.302297	XS01G0215200/XS01G0397000/XS05G0004000/XS05G0040700/XS08G0038200/XS10G0088100/XS10G0193200/XS11G0171700/XS12G0096600/XS12G0140500/XS13G0030300/XS14G0070900	12
GO:0009968	negative regulation of signal transduction|BP	34/1733	221/17622	0.00573449	0.324496	0.316383	XS01G0025400/XS01G0301300/XS02G0044300/XS03G0199000/XS03G0247200/XS03G0263600/XS04G0060600/XS04G0128100/XS04G0129100/XS04G0162400/XS04G0219700/XS04G0260000/XS04G0260100/XS05G0136000/XS07G0001900/XS07G0071700/XS07G0089700/XS07G0109900/XS08G0063600/XS08G0115900/XS08G0138900/XS09G0185200/XS09G0186400/XS10G0121700/XS12G0010300/XS12G0115000/XS12G0230600/XS13G0141600/XS13G0263200/XS14G0018600/XS15G0132…	34
GO:0140098	catalytic activity, acting on RNA|MF	60/1733	441/17622	0.00603698	0.328473	0.320261	XS01G0012800/XS01G0014100/XS01G0127400/XS01G0233700/XS01G0238200/XS01G0370100/XS01G0401400/XS02G0025200/XS02G0051600/XS02G0060500/XS02G0067500/XS02G0225700/XS02G0226100/XS03G0114800/XS03G0199600/XS03G0255900/XS03G0256500/XS04G0081200/XS04G0167800/XS04G0167900/XS04G0172600/XS04G0231300/XS04G0291800/XS05G0150600/XS05G0176000/XS05G0177900/XS05G0233500/XS05G0260200/XS05G0261600/XS05G0262000/XS06G0114…	60
GO:0043687	post-translational protein modification|BP	21/1733	121/17622	0.0070776	0.370831	0.36156	XS01G0245200/XS01G0347500/XS02G0067500/XS02G0091300/XS03G0219800/XS03G0229300/XS03G0255900/XS04G0153300/XS04G0154300/XS06G0114900/XS07G0058600/XS08G0047600/XS09G0222400/XS10G0003900/XS10G0011700/XS11G0041900/XS12G0115000/XS12G0116600/XS13G0188200/XS14G0121300/XS15G0085000	21
GO:0033043	regulation of organelle organization|BP	54/1733	393/17622	0.00729406	0.37475	0.365381	XS01G0025400/XS01G0126700/XS01G0152600/XS01G0209200/XS01G0215300/XS01G0219700/XS01G0286400/XS01G0301300/XS01G0347500/XS02G0067500/XS02G0192000/XS02G0225700/XS02G0226100/XS02G0265500/XS02G0288900/XS03G0106400/XS03G0126800/XS03G0170300/XS03G0245900/XS04G0060600/XS04G0080700/XS04G0153300/XS05G0030300/XS05G0081400/XS05G0103600/XS05G0109700/XS05G0240000/XS06G0079900/XS06G0225000/XS06G0246300/XS07G0001…	54
GO:0045489	pectin biosynthetic process|BP	12/1733	56/17622	0.00732899	0.37475	0.365381	XS01G0168100/XS01G0215200/XS01G0244900/XS01G0257500/XS01G0397000/XS03G0188900/XS03G0288100/XS04G0104700/XS04G0228900/XS06G0225600/XS07G0175500/XS13G0005700	12
GO:1905393	plant organ formation|BP	44/1733	308/17622	0.0074279	0.375286	0.365903	XS01G0211400/XS01G0280600/XS01G0344200/XS03G0107800/XS03G0338400/XS04G0137400/XS04G0267600/XS05G0025000/XS05G0037400/XS05G0078800/XS05G0112300/XS05G0147600/XS05G0263700/XS05G0264100/XS05G0265400/XS05G0265800/XS06G0014800/XS06G0140700/XS06G0225000/XS07G0072800/XS08G0181800/XS08G0188200/XS10G0054900/XS11G0036500/XS11G0055300/XS12G0027100/XS12G0048500/XS12G0070900/XS12G0208900/XS12G0210500/XS12G0233…	44
GO:0010393	galacturonan metabolic process|BP	30/1733	193/17622	0.00783944	0.391419	0.381633	XS01G0168100/XS01G0215200/XS01G0244900/XS01G0257500/XS01G0297700/XS01G0297800/XS01G0351700/XS01G0397000/XS03G0000500/XS03G0057600/XS03G0168500/XS03G0188900/XS03G0288100/XS03G0303100/XS03G0303300/XS03G0318000/XS03G0328000/XS04G0104700/XS04G0228900/XS05G0058900/XS05G0083300/XS05G0151100/XS06G0225600/XS07G0175500/XS11G0154600/XS12G0101200/XS13G0005700/XS13G0134900/XSUnG0176100/XSUnG0222200	30
GO:0061695	transferase complex, transferring phosphorus-containing groups|CC	20/1733	115/17622	0.00825386	0.402014	0.391963	XS01G0332900/XS02G0060500/XS03G0114800/XS03G0245900/XS04G0221500/XS04G0231300/XS05G0213600/XS06G0127700/XS06G0260100/XS07G0084300/XS09G0186400/XS10G0002600/XS10G0144500/XS12G0233500/XS13G0114100/XS13G0168000/XS14G0018600/XS14G0130400/XS15G0028400/XSUnG0213200	20
GO:0006897	endocytosis|BP	27/1733	170/17622	0.0085024	0.402014	0.391963	XS01G0336100/XS02G0047100/XS02G0138200/XS02G0174400/XS02G0264100/XS03G0203000/XS03G0271500/XS04G0203500/XS04G0260000/XS04G0276200/XS05G0037400/XS05G0081400/XS05G0162800/XS05G0195200/XS05G0240000/XS05G0265400/XS06G0045400/XS06G0079900/XS09G0162300/XS11G0055300/XS12G0010300/XS12G0042400/XS12G0230600/XS12G0233900/XS12G0254800/XS14G0024000/XS14G0108100	27
GO:0010648	negative regulation of cell communication|BP	34/1733	227/17622	0.00862	0.402014	0.391963	XS01G0025400/XS01G0301300/XS02G0044300/XS03G0199000/XS03G0247200/XS03G0263600/XS04G0060600/XS04G0128100/XS04G0129100/XS04G0162400/XS04G0219700/XS04G0260000/XS04G0260100/XS05G0136000/XS07G0001900/XS07G0071700/XS07G0089700/XS07G0109900/XS08G0063600/XS08G0115900/XS08G0138900/XS09G0185200/XS09G0186400/XS10G0121700/XS12G0010300/XS12G0115000/XS12G0230600/XS13G0141600/XS13G0263200/XS14G0018600/XS15G0132…	34
GO:0023057	negative regulation of signaling|BP	34/1733	227/17622	0.00862	0.402014	0.391963	XS01G0025400/XS01G0301300/XS02G0044300/XS03G0199000/XS03G0247200/XS03G0263600/XS04G0060600/XS04G0128100/XS04G0129100/XS04G0162400/XS04G0219700/XS04G0260000/XS04G0260100/XS05G0136000/XS07G0001900/XS07G0071700/XS07G0089700/XS07G0109900/XS08G0063600/XS08G0115900/XS08G0138900/XS09G0185200/XS09G0186400/XS10G0121700/XS12G0010300/XS12G0115000/XS12G0230600/XS13G0141600/XS13G0263200/XS14G0018600/XS15G0132…	34
GO:1902905	positive regulation of supramolecular fiber organization|BP	15/1733	79/17622	0.00938138	0.428436	0.417724	XS01G0152600/XS01G0215300/XS01G0347500/XS02G0288900/XS03G0126800/XS04G0080700/XS05G0240000/XS06G0079900/XS06G0225000/XS08G0154400/XS11G0077900/XS13G0042100/XS13G0154000/XS14G0024000/XS14G0121300	15
GO:0043565	sequence-specific DNA binding|MF	62/1733	468/17622	0.00938844	0.428436	0.417724	XS01G0126700/XS01G0275200/XS01G0301300/XS01G0363800/XS01G0385800/XS01G0389800/XS02G0025200/XS02G0047200/XS02G0091300/XS02G0265500/XS03G0079300/XS03G0087600/XS03G0106400/XS03G0317700/XS03G0323300/XS04G0043800/XS04G0070000/XS04G0154300/XS04G0181200/XS04G0265400/XS05G0078800/XS05G0136000/XS05G0195100/XS06G0006500/XS06G0047300/XS06G0074700/XS06G0151600/XS07G0001900/XS07G0095700/XS07G0096100/XS07G0110…	62
GO:0061025	membrane fusion|BP	13/1733	65/17622	0.00975903	0.44061	0.429594	XS01G0133200/XS01G0232100/XS01G0320900/XS02G0047100/XS03G0178100/XS04G0046100/XS04G0276200/XS06G0084500/XS06G0120300/XS08G0046900/XS09G0003000/XS11G0192000/XS14G0077600	13
GO:0043543	protein acylation|BP	22/1733	133/17622	0.0104218	0.455812	0.444417	XS01G0267500/XS01G0301300/XS02G0125000/XS03G0106400/XS03G0132100/XS03G0245900/XS03G0247200/XS03G0283800/XS03G0285100/XS04G0166800/XS05G0078800/XS05G0183500/XS07G0001900/XS07G0161400/XS08G0216200/XS09G0001400/XS09G0231000/XS11G0202600/XS12G0126900/XS13G0202700/XS13G0236300/XSUnG0162800	22
GO:0048029	monosaccharide binding|MF	15/1733	80/17622	0.0105254	0.455812	0.444417	XS01G0281900/XS03G0187400/XS05G0246100/XS06G0029000/XS10G0009200/XS10G0009300/XS10G0009400/XS10G0114900/XS11G0178900/XS11G0222000/XS11G0222100/XS11G0222300/XS11G0222500/XS11G0222700/XS13G0020800	15
GO:0051495	positive regulation of cytoskeleton organization|BP	15/1733	80/17622	0.0105254	0.455812	0.444417	XS01G0152600/XS01G0215300/XS01G0347500/XS02G0288900/XS03G0126800/XS04G0080700/XS05G0240000/XS06G0079900/XS06G0225000/XS08G0154400/XS11G0077900/XS13G0042100/XS13G0154000/XS14G0024000/XS14G0121300	15
GO:1901136	carbohydrate derivative catabolic process|BP	17/1733	95/17622	0.010743	0.46054	0.449026	XS01G0118200/XS01G0286600/XS01G0332500/XS03G0025900/XS03G0026000/XS03G0060500/XS03G0219800/XS03G0247500/XS04G0166800/XS05G0145000/XS05G0167400/XS09G0012700/XS10G0174700/XS11G0211900/XS13G0188200/XS14G0086600/XSUnG0045400	17
GO:0006399	tRNA metabolic process|BP	31/1733	206/17622	0.0109954	0.466644	0.454977	XS01G0012800/XS01G0014100/XS01G0127400/XS01G0246900/XS01G0268300/XS01G0269600/XS02G0051600/XS02G0060500/XS04G0167800/XS04G0167900/XS04G0291800/XS05G0150600/XS05G0176000/XS05G0233500/XS05G0260200/XS05G0262000/XS07G0011900/XS07G0266200/XS07G0282500/XS08G0040200/XS09G0025500/XS09G0231000/XS10G0113200/XS10G0113500/XS10G0154300/XS11G0224400/XS12G0042400/XS12G0252600/XS14G0121300/XS15G0110200/XSUnG0083…	31
GO:0032273	positive regulation of protein polymerization|BP	14/1733	74/17622	0.0122126	0.475508	0.463619	XS01G0152600/XS01G0215300/XS01G0347500/XS02G0288900/XS03G0126800/XS04G0080700/XS05G0240000/XS06G0079900/XS06G0225000/XS08G0154400/XS11G0077900/XS13G0042100/XS14G0024000/XS14G0121300	14
GO:1904949	ATPase complex|CC	14/1733	74/17622	0.0122126	0.475508	0.463619	XS01G0219700/XS02G0047200/XS02G0174400/XS03G0247200/XS03G0322500/XS05G0183500/XS05G0240900/XS08G0004400/XS10G0166400/XS12G0014300/XS12G0014500/XS12G0254800/XS13G0012800/XS14G0069500	14
GO:0055029	nuclear DNA-directed RNA polymerase complex|CC	14/1733	75/17622	0.0136959	0.523654	0.510562	XS02G0060500/XS03G0114800/XS03G0245900/XS04G0231300/XS06G0127700/XS06G0260100/XS07G0084300/XS09G0186400/XS10G0002600/XS10G0144500/XS13G0114100/XS14G0130400/XS15G0028400/XSUnG0213200	14
GO:0010048	vernalization response|BP	13/1733	68/17622	0.0141635	0.534132	0.520778	XS02G0056800/XS02G0057300/XS02G0057500/XS02G0057600/XS02G0115200/XS04G0098100/XS05G0265500/XS07G0025400/XS10G0152600/XS11G0065100/XS11G0084200/XS12G0184500/XSUnG0099600	13
GO:0000139	Golgi membrane|CC	56/1733	425/17622	0.0144367	0.534132	0.520778	XS01G0000500/XS01G0112300/XS01G0168100/XS01G0231300/XS01G0232100/XS01G0244900/XS01G0245200/XS01G0257500/XS01G0330000/XS02G0125000/XS02G0264100/XS03G0188900/XS03G0230500/XS03G0243700/XS03G0252100/XS03G0262100/XS03G0271500/XS03G0283800/XS03G0285100/XS03G0288100/XS03G0303300/XS04G0104700/XS04G0203500/XS04G0228900/XS04G0260100/XS05G0016100/XS05G0037400/XS05G0063200/XS05G0095200/XS05G0208100/XS05G0208…	56
GO:0031365	N-terminal protein amino acid modification|BP	12/1733	61/17622	0.0144956	0.534132	0.520778	XS01G0238500/XS03G0132100/XS03G0142600/XS04G0166800/XS08G0216200/XS09G0001400/XS09G0184600/XS09G0205100/XS09G0231000/XS12G0126900/XS13G0202700/XS13G0236300	12
GO:0006418	tRNA aminoacylation for protein translation|BP	11/1733	54/17622	0.0146267	0.534132	0.520778	XS01G0012800/XS01G0014100/XS04G0167800/XS04G0167900/XS05G0233500/XS05G0260200/XS07G0282500/XS10G0113200/XS10G0113500/XS11G0224400/XS15G0110200	11
GO:0020037	heme binding|MF	58/1733	444/17622	0.015296	0.534132	0.520778	XS01G0005700/XS01G0200000/XS01G0348200/XS01G0385100/XS02G0029100/XS02G0053300/XS02G0256300/XS02G0273900/XS03G0151600/XS04G0059900/XS04G0060300/XS04G0194000/XS04G0251100/XS04G0273800/XS05G0004000/XS05G0018600/XS05G0024000/XS05G0026200/XS05G0040700/XS06G0164300/XS07G0055300/XS07G0081600/XS07G0183900/XS07G0207200/XS07G0209000/XS07G0210600/XS07G0221900/XS07G0267000/XS07G0269300/XS08G0021500/XS08G0021…	58
GO:0007015	actin filament organization|BP	21/1733	130/17622	0.0156478	0.534132	0.520778	XS01G0125000/XS01G0152600/XS01G0215300/XS01G0286400/XS01G0316200/XS01G0347500/XS02G0138200/XS02G0288900/XS03G0126800/XS04G0080700/XS05G0240000/XS06G0079900/XS06G0225000/XS08G0007000/XS10G0103200/XS10G0134600/XS11G0077900/XS12G0230600/XS13G0042100/XS14G0121300/XSUnG0056900	21
GO:0001763	morphogenesis of a branching structure|BP	13/1733	69/17622	0.0159271	0.534132	0.520778	XS04G0137400/XS05G0078800/XS05G0264100/XS05G0265400/XS05G0265800/XS08G0181800/XS13G0015400/XS13G0030300/XS14G0076100/XS14G0076600/XS15G0104200/XS15G0168100/XSUnG0162800	13
GO:0016701	oxidoreductase activity, acting on single donors with incorporation of molecular oxygen|MF	13/1733	69/17622	0.0159271	0.534132	0.520778	XS01G0172500/XS03G0065800/XS03G0315700/XS05G0121900/XS05G0151500/XS05G0174500/XS06G0048000/XS10G0001900/XS10G0029800/XS10G0030000/XS10G0030100/XS12G0102200/XS15G0068200	13
GO:0009740	gibberellic acid mediated signaling pathway|BP	20/1733	123/17622	0.0168591	0.534132	0.520778	XS01G0238800/XS01G0294300/XS01G0295400/XS01G0295500/XS01G0301300/XS01G0363800/XS01G0376400/XS01G0389800/XS03G0322700/XS04G0239900/XS05G0069800/XS05G0258700/XS07G0001900/XS07G0022500/XS08G0063600/XS08G0138900/XS12G0105000/XS12G0115000/XS13G0141600/XS13G0157500	20
GO:0010476	gibberellin mediated signaling pathway|BP	20/1733	123/17622	0.0168591	0.534132	0.520778	XS01G0238800/XS01G0294300/XS01G0295400/XS01G0295500/XS01G0301300/XS01G0363800/XS01G0376400/XS01G0389800/XS03G0322700/XS04G0239900/XS05G0069800/XS05G0258700/XS07G0001900/XS07G0022500/XS08G0063600/XS08G0138900/XS12G0105000/XS12G0115000/XS13G0141600/XS13G0157500	20
GO:0000428	DNA-directed RNA polymerase complex|CC	14/1733	77/17622	0.0170757	0.534132	0.520778	XS02G0060500/XS03G0114800/XS03G0245900/XS04G0231300/XS06G0127700/XS06G0260100/XS07G0084300/XS09G0186400/XS10G0002600/XS10G0144500/XS13G0114100/XS14G0130400/XS15G0028400/XSUnG0213200	14
GO:0030880	RNA polymerase complex|CC	14/1733	77/17622	0.0170757	0.534132	0.520778	XS02G0060500/XS03G0114800/XS03G0245900/XS04G0231300/XS06G0127700/XS06G0260100/XS07G0084300/XS09G0186400/XS10G0002600/XS10G0144500/XS13G0114100/XS14G0130400/XS15G0028400/XSUnG0213200	14
GO:0030133	transport vesicle|CC	17/1733	100/17622	0.0174939	0.534132	0.520778	XS01G0000500/XS01G0232100/XS03G0074100/XS04G0046100/XS04G0260000/XS04G0262300/XS05G0081400/XS06G0084500/XS08G0110600/XS08G0115900/XS09G0181300/XS09G0224200/XS10G0198800/XS12G0010300/XS12G0135000/XS13G0184400/XS14G0108100	17
GO:1902533	positive regulation of intracellular signal transduction|BP	15/1733	85/17622	0.017977	0.540293	0.526785	XS01G0286400/XS02G0007300/XS02G0265500/XS03G0247200/XS04G0260000/XS08G0115900/XS10G0054900/XS11G0028400/XS12G0010300/XS12G0230600/XS13G0195200/XS13G0263200/XS15G0107100/XS15G0148700/XSUnG0192000	15
GO:0048443	stamen development|BP	33/1733	231/17622	0.0184805	0.540293	0.526785	XS01G0032500/XS01G0211400/XS01G0238800/XS01G0301300/XS01G0344200/XS03G0106400/XS03G0338400/XS04G0143800/XS05G0025000/XS05G0044800/XS05G0083300/XS05G0112300/XS05G0147600/XS05G0151100/XS05G0258700/XS05G0263700/XS05G0264100/XS05G0265400/XS06G0014800/XS07G0001900/XS07G0094600/XS07G0221900/XS07G0269800/XS09G0174200/XS10G0030100/XS10G0039200/XS10G0192500/XS11G0100700/XS11G0230200/XS12G0027100/XS12G0160…	33
GO:0048466	androecium development|BP	33/1733	231/17622	0.0184805	0.540293	0.526785	XS01G0032500/XS01G0211400/XS01G0238800/XS01G0301300/XS01G0344200/XS03G0106400/XS03G0338400/XS04G0143800/XS05G0025000/XS05G0044800/XS05G0083300/XS05G0112300/XS05G0147600/XS05G0151100/XS05G0258700/XS05G0263700/XS05G0264100/XS05G0265400/XS06G0014800/XS07G0001900/XS07G0094600/XS07G0221900/XS07G0269800/XS09G0174200/XS10G0030100/XS10G0039200/XS10G0192500/XS11G0100700/XS11G0230200/XS12G0027100/XS12G0160…	33
GO:0012506	vesicle membrane|CC	26/1733	173/17622	0.0189511	0.540293	0.526785	XS01G0000500/XS01G0139800/XS01G0232100/XS01G0249100/XS02G0125000/XS03G0129000/XS03G0189000/XS03G0283800/XS03G0285100/XS04G0260000/XS04G0262300/XS04G0267600/XS05G0030300/XS05G0044800/XS06G0034100/XS06G0079900/XS08G0115900/XS09G0181300/XS09G0220400/XS09G0221600/XS09G0232100/XS10G0198800/XS12G0010300/XS14G0029800/XS14G0108100/XS15G0148700	26
GO:0090406	pollen tube|CC	14/1733	78/17622	0.0189871	0.540293	0.526785	XS01G0257500/XS01G0387700/XS03G0168500/XS03G0188900/XS03G0308500/XS04G0162400/XS04G0285600/XS05G0037400/XS07G0109900/XS09G0030500/XS09G0031900/XS11G0055300/XS12G0233900/XS13G0239400	14
GO:0048528	post-embryonic root development|BP	31/1733	215/17622	0.0194335	0.540293	0.526785	XS01G0017900/XS01G0211400/XS01G0280600/XS03G0247200/XS03G0336200/XS04G0072500/XS04G0239500/XS04G0260000/XS05G0037400/XS06G0140700/XS06G0151600/XS07G0074300/XS07G0160900/XS08G0092200/XS08G0093800/XS08G0188200/XS09G0090100/XS10G0054900/XS10G0121700/XS11G0055300/XS12G0010300/XS12G0208900/XS12G0233900/XS13G0015400/XS14G0071700/XS14G0100800/XS15G0014300/XS15G0031900/XS15G0104200/XSUnG0053500/XSUnG0130…	31
GO:0005815	microtubule organizing center|CC	22/1733	141/17622	0.0197853	0.540293	0.526785	XS01G0053300/XS01G0125000/XS01G0233700/XS01G0330000/XS02G0192000/XS02G0265500/XS03G0172900/XS03G0247200/XS03G0271500/XS04G0203500/XS06G0003300/XS07G0071700/XS08G0154400/XS08G0168900/XS12G0176600/XS12G0208900/XS12G0233500/XS13G0154000/XS13G0263200/XS14G0018600/XS14G0024000/XS15G0107100	22
GO:0051493	regulation of cytoskeleton organization|BP	20/1733	125/17622	0.0198417	0.540293	0.526785	XS01G0152600/XS01G0215300/XS01G0286400/XS01G0347500/XS02G0192000/XS02G0265500/XS02G0288900/XS03G0126800/XS04G0060600/XS04G0080700/XS05G0240000/XS06G0079900/XS06G0225000/XS08G0154400/XS11G0077900/XS13G0042100/XS13G0154000/XS14G0024000/XS14G0121300/XS15G0107100	20
GO:0071370	cellular response to gibberellin stimulus|BP	20/1733	125/17622	0.0198417	0.540293	0.526785	XS01G0238800/XS01G0294300/XS01G0295400/XS01G0295500/XS01G0301300/XS01G0363800/XS01G0376400/XS01G0389800/XS03G0322700/XS04G0239900/XS05G0069800/XS05G0258700/XS07G0001900/XS07G0022500/XS08G0063600/XS08G0138900/XS12G0105000/XS12G0115000/XS13G0141600/XS13G0157500	20
GO:0060284	regulation of cell development|BP	15/1733	86/17622	0.019859	0.540293	0.526785	XS01G0209200/XS01G0245200/XS01G0246900/XS02G0138200/XS03G0010800/XS03G0308500/XS05G0240000/XS08G0076800/XS09G0030500/XS09G0031900/XS10G0097800/XS12G0230600/XS12G0254800/XS13G0263200/XS15G0107100	15
GO:0016197	endosomal transport|BP	13/1733	71/17622	0.019949	0.540293	0.526785	XS04G0129100/XS04G0221500/XS04G0256400/XS05G0037400/XS05G0081400/XS05G0208100/XS05G0208200/XS12G0176600/XS12G0233900/XS12G0254800/XS14G0024000/XS15G0148700/XSUnG0126200	13
GO:0071695	anatomical structure maturation|BP	61/1733	478/17622	0.0205715	0.540293	0.526785	XS01G0210700/XS01G0275200/XS01G0295400/XS01G0295500/XS01G0346200/XS01G0347500/XS01G0366500/XS01G0376400/XS02G0007000/XS02G0036200/XS02G0044300/XS03G0000500/XS03G0065800/XS03G0074100/XS03G0144400/XS03G0187400/XS03G0256600/XS03G0261000/XS03G0300000/XS03G0322700/XS03G0338400/XS04G0242400/XS04G0267600/XS05G0037400/XS05G0083300/XS05G0089600/XS05G0151100/XS05G0152200/XS05G0240000/XS06G0014800/XS06G0027…	61
GO:0044433	cytoplasmic vesicle part|CC	47/1733	354/17622	0.0207385	0.540293	0.526785	XS01G0000500/XS01G0112300/XS01G0139800/XS01G0232100/XS01G0249100/XS02G0125000/XS03G0129000/XS03G0189000/XS03G0243700/XS03G0283800/XS03G0285100/XS03G0338400/XS04G0046100/XS04G0260000/XS04G0262300/XS05G0030300/XS05G0037400/XS05G0044800/XS05G0147600/XS05G0208100/XS05G0208200/XS05G0264100/XS05G0265400/XS06G0034100/XS06G0044500/XS06G0045400/XS06G0079900/XS07G0256100/XS08G0115900/XS09G0162300/XS09G0181…	47
GO:0010223	secondary shoot formation|BP	12/1733	64/17622	0.0208147	0.540293	0.526785	XS04G0137400/XS05G0078800/XS05G0264100/XS05G0265400/XS05G0265800/XS08G0181800/XS13G0015400/XS13G0030300/XS14G0076100/XS14G0076600/XS15G0104200/XSUnG0162800	12
GO:0010346	shoot axis formation|BP	12/1733	64/17622	0.0208147	0.540293	0.526785	XS04G0137400/XS05G0078800/XS05G0264100/XS05G0265400/XS05G0265800/XS08G0181800/XS13G0015400/XS13G0030300/XS14G0076100/XS14G0076600/XS15G0104200/XSUnG0162800	12
GO:0015629	actin cytoskeleton|CC	12/1733	64/17622	0.0208147	0.540293	0.526785	XS01G0125000/XS01G0215300/XS03G0074100/XS03G0245900/XS03G0280300/XS04G0080700/XS05G0240000/XS06G0079900/XS09G0224200/XS10G0134600/XS11G0077900/XS15G0107100	12
GO:0010119	regulation of stomatal movement|BP	19/1733	118/17622	0.0214276	0.540293	0.526785	XS01G0137000/XS03G0161600/XS03G0261000/XS04G0003000/XS04G0003700/XS04G0014600/XS04G0242400/XS06G0084500/XS07G0013800/XS07G0029300/XS09G0003700/XS09G0185200/XS09G0202100/XS10G0097800/XS10G0103200/XS13G0141600/XS13G0194600/XS15G0170000/XSUnG0012000	19
GO:0009910	negative regulation of flower development|BP	11/1733	57/17622	0.021515	0.540293	0.526785	XS01G0363800/XS02G0115200/XS03G0269900/XS04G0098100/XS04G0154300/XS06G0246300/XS08G0050700/XS09G0186400/XS11G0065100/XS11G0084200/XS13G0168000	11
GO:0010769	regulation of cell morphogenesis involved in differentiation|BP	11/1733	57/17622	0.021515	0.540293	0.526785	XS01G0246900/XS02G0138200/XS03G0010800/XS03G0308500/XS08G0076800/XS09G0030500/XS09G0031900/XS10G0097800/XS12G0230600/XS13G0263200/XS15G0107100	11
GO:1902275	regulation of chromatin organization|BP	15/1733	87/17622	0.0218868	0.544744	0.531125	XS01G0126700/XS01G0219700/XS01G0301300/XS02G0225700/XS02G0226100/XS03G0106400/XS07G0001900/XS10G0186600/XS11G0028400/XS12G0034300/XS12G0237700/XS13G0168000/XS13G0223400/XS14G0121300/XS15G0028400	15
GO:0009062	fatty acid catabolic process|BP	17/1733	103/17622	0.022887	0.564724	0.550605	XS01G0304100/XS01G0377100/XS02G0036200/XS03G0021400/XS03G0132100/XS03G0283800/XS03G0285100/XS04G0152000/XS04G0190300/XS04G0191000/XS04G0221500/XS06G0014000/XS06G0235800/XS07G0248200/XS08G0004400/XS12G0134500/XS12G0135800	17
GO:0009555	pollen development|BP	62/1733	490/17622	0.0231002	0.566689	0.552521	XS01G0211400/XS01G0301300/XS01G0344200/XS01G0387700/XS02G0141700/XS03G0042100/XS03G0106400/XS03G0129000/XS03G0215200/XS03G0215400/XS03G0338400/XS04G0060600/XS04G0154300/XS04G0221500/XS04G0268300/XS05G0025000/XS05G0040700/XS05G0044800/XS05G0083300/XS05G0112300/XS05G0121900/XS05G0147600/XS05G0151100/XS05G0197900/XS05G0263700/XS05G0264100/XS05G0265400/XS06G0006500/XS06G0014800/XS07G0001900/XS07G0021…	62
GO:0071669	plant-type cell wall organization or biogenesis|BP	55/1733	428/17622	0.0237627	0.579592	0.565102	XS01G0168100/XS01G0215200/XS01G0244900/XS01G0286400/XS01G0304800/XS01G0397000/XS03G0178100/XS03G0336200/XS05G0025000/XS05G0031000/XS05G0058900/XS05G0083300/XS05G0151100/XS05G0152200/XS05G0156200/XS05G0240000/XS05G0252400/XS06G0030000/XS06G0205500/XS06G0225600/XS07G0016700/XS07G0074300/XS07G0095000/XS07G0119400/XS07G0182500/XS07G0269800/XS08G0046900/XS08G0076800/XS10G0039200/XS10G0127500/XS10G0157…	55
GO:2000242	negative regulation of reproductive process|BP	15/1733	89/17622	0.026405	0.609037	0.59381	XS01G0363800/XS02G0115200/XS03G0269900/XS04G0098100/XS04G0154300/XS06G0246300/XS07G0143600/XS08G0050700/XS09G0186400/XS11G0065100/XS11G0084200/XS13G0141600/XS13G0168000/XS14G0018600/XS15G0168600	15
GO:0016706	oxidoreductase activity, acting on paired donors, with incorporation or reduction of molecular oxygen, 2-oxoglutarate as one donor, and incorporation of one atom each of oxygen into both donors|MF	25/1733	170/17622	0.0268216	0.609096	0.593868	XS01G0246900/XS01G0281900/XS03G0146800/XS03G0187400/XS04G0239900/XS05G0120500/XS05G0246100/XS06G0028000/XS06G0028300/XS06G0029000/XS09G0141300/XS10G0009200/XS10G0009300/XS10G0009400/XS10G0114900/XS11G0178900/XS11G0222000/XS11G0222100/XS11G0222300/XS11G0222500/XS11G0222700/XS13G0020800/XS13G0060600/XS13G0168000/XS14G0035100	25
GO:0070925	organelle assembly|BP	25/1733	170/17622	0.0268216	0.609096	0.593868	XS01G0025400/XS01G0133200/XS01G0300800/XS01G0332900/XS02G0047100/XS02G0126100/XS02G0264100/XS03G0172900/XS03G0271500/XS04G0203500/XS04G0260000/XS04G0276200/XS05G0240000/XS06G0079900/XS07G0212500/XS08G0019300/XS11G0041900/XS12G0010300/XS12G0051200/XS12G0197400/XS12G0209400/XS12G0230600/XS12G0254800/XS13G0263200/XSPtG0005700	25
GO:0031334	positive regulation of protein complex assembly|BP	16/1733	97/17622	0.0268675	0.609096	0.593868	XS01G0025400/XS01G0152600/XS01G0215300/XS01G0347500/XS02G0288900/XS03G0126800/XS04G0080700/XS05G0240000/XS06G0079900/XS06G0225000/XS08G0154400/XS11G0077900/XS12G0197400/XS13G0042100/XS14G0024000/XS14G0121300	16
GO:0043038	amino acid activation|BP	11/1733	59/17622	0.0272687	0.609096	0.593868	XS01G0012800/XS01G0014100/XS04G0167800/XS04G0167900/XS05G0233500/XS05G0260200/XS07G0282500/XS10G0113200/XS10G0113500/XS11G0224400/XS15G0110200	11
GO:0043039	tRNA aminoacylation|BP	11/1733	59/17622	0.0272687	0.609096	0.593868	XS01G0012800/XS01G0014100/XS04G0167800/XS04G0167900/XS05G0233500/XS05G0260200/XS07G0282500/XS10G0113200/XS10G0113500/XS11G0224400/XS15G0110200	11
GO:0043410	positive regulation of MAPK cascade|BP	11/1733	59/17622	0.0272687	0.609096	0.593868	XS02G0265500/XS04G0260000/XS08G0115900/XS10G0054900/XS11G0028400/XS12G0010300/XS12G0230600/XS13G0263200/XS15G0107100/XS15G0148700/XSUnG0192000	11
GO:0120025	plasma membrane bounded cell projection|CC	31/1733	221/17622	0.0274626	0.610216	0.59496	XS01G0053300/XS01G0125000/XS01G0257500/XS01G0387700/XS02G0125000/XS03G0074100/XS03G0168500/XS03G0172900/XS03G0188900/XS03G0308500/XS04G0162400/XS04G0221500/XS04G0285600/XS05G0030300/XS05G0037400/XS05G0240000/XS07G0071700/XS07G0109900/XS08G0115900/XS09G0030500/XS09G0031900/XS09G0224200/XS11G0055300/XS12G0230600/XS12G0233500/XS12G0233900/XS12G0254800/XS13G0239400/XS13G0263200/XS14G0018600/XS15G0132…	31
GO:0042995	cell projection|CC	32/1733	230/17622	0.0281497	0.611307	0.596024	XS01G0053300/XS01G0125000/XS01G0215300/XS01G0257500/XS01G0387700/XS02G0125000/XS03G0074100/XS03G0168500/XS03G0172900/XS03G0188900/XS03G0308500/XS04G0162400/XS04G0221500/XS04G0285600/XS05G0030300/XS05G0037400/XS05G0240000/XS07G0071700/XS07G0109900/XS08G0115900/XS09G0030500/XS09G0031900/XS09G0224200/XS11G0055300/XS12G0230600/XS12G0233500/XS12G0233900/XS12G0254800/XS13G0239400/XS13G0263200/XS14G0018…	32
GO:0042327	positive regulation of phosphorylation|BP	15/1733	90/17622	0.0289079	0.611307	0.596024	XS02G0265500/XS03G0271500/XS04G0203500/XS04G0221500/XS04G0260000/XS08G0115900/XS10G0054900/XS11G0028400/XS12G0010300/XS12G0230600/XS13G0263200/XS14G0018600/XS15G0107100/XS15G0148700/XSUnG0192000	15
GO:0042626	ATPase activity, coupled to transmembrane movement of substances|MF	27/1733	188/17622	0.0289688	0.611307	0.596024	XS01G0001900/XS01G0210700/XS01G0286600/XS03G0215200/XS03G0215400/XS03G0262100/XS04G0268300/XS04G0286900/XS05G0101200/XS05G0240900/XS06G0026500/XS06G0027200/XS06G0072700/XS06G0115500/XS07G0086500/XS08G0004400/XS08G0246100/XS09G0003700/XS09G0168000/XS09G0209400/XS10G0088100/XS13G0030300/XS13G0062200/XS13G0149000/XS13G0149200/XSUnG0029800/XSUnG0101700	27
GO:0045010	actin nucleation|BP	12/1733	67/17622	0.0289772	0.611307	0.596024	XS01G0152600/XS01G0215300/XS01G0347500/XS02G0288900/XS03G0126800/XS04G0080700/XS05G0240000/XS06G0079900/XS06G0225000/XS11G0077900/XS13G0042100/XS14G0121300	12
GO:0009100	glycoprotein metabolic process|BP	29/1733	205/17622	0.0290962	0.611307	0.596024	XS01G0190600/XS01G0223300/XS01G0232100/XS01G0245200/XS01G0282100/XS01G0303600/XS02G0264100/XS03G0219800/XS03G0252100/XS03G0269900/XS04G0125500/XS04G0154300/XS04G0166800/XS05G0063200/XS05G0167400/XS08G0256000/XS09G0026800/XS10G0003900/XS10G0174700/XS12G0115000/XS12G0138800/XS12G0239000/XS13G0052900/XS13G0102600/XS13G0188200/XS13G0263200/XS15G0085000/XSUnG0210300/XSUnG0229700	29
GO:0008033	tRNA processing|BP	17/1733	106/17622	0.0294547	0.611651	0.596359	XS01G0127400/XS01G0246900/XS01G0268300/XS01G0269600/XS02G0051600/XS04G0291800/XS05G0150600/XS05G0176000/XS05G0262000/XS07G0011900/XS07G0266200/XS08G0040200/XS09G0025500/XS09G0231000/XS10G0154300/XS12G0252600/XSUnG0083600	17
GO:0043492	ATPase activity, coupled to movement of substances|MF	28/1733	197/17622	0.0299202	0.611651	0.596359	XS01G0001900/XS01G0210700/XS01G0286600/XS03G0215200/XS03G0215400/XS03G0262100/XS04G0268300/XS04G0286900/XS05G0101200/XS05G0240900/XS06G0026500/XS06G0027200/XS06G0072700/XS06G0115500/XS07G0086500/XS08G0004400/XS08G0246100/XS09G0003700/XS09G0168000/XS09G0209400/XS10G0088100/XS12G0254800/XS13G0030300/XS13G0062200/XS13G0149000/XS13G0149200/XSUnG0029800/XSUnG0101700	28
GO:0044087	regulation of cellular component biogenesis|BP	28/1733	197/17622	0.0299202	0.611651	0.596359	XS01G0025400/XS01G0152600/XS01G0215300/XS01G0219700/XS01G0347500/XS02G0225700/XS02G0226100/XS02G0265500/XS02G0288900/XS03G0126800/XS03G0276500/XS04G0080700/XS05G0240000/XS05G0252400/XS06G0079900/XS06G0225000/XS08G0154400/XS11G0077900/XS12G0065200/XS12G0197400/XS12G0230600/XS13G0042100/XS13G0052100/XS13G0085100/XS13G0157500/XS14G0018600/XS14G0024000/XS14G0121300	28
GO:0007031	peroxisome organization|BP	13/1733	75/17622	0.030208	0.611651	0.596359	XS01G0377100/XS02G0036200/XS02G0138200/XS03G0132100/XS03G0283800/XS03G0285100/XS04G0152000/XS04G0221500/XS06G0014000/XS06G0235800/XS08G0004400/XS09G0003000/XS13G0022400	13
GO:0004812	aminoacyl-tRNA ligase activity|MF	11/1733	60/17622	0.0305274	0.611651	0.596359	XS01G0012800/XS01G0014100/XS04G0167800/XS04G0167900/XS05G0233500/XS05G0260200/XS07G0282500/XS10G0113200/XS10G0113500/XS11G0224400/XS15G0110200	11
GO:0016875	ligase activity, forming carbon-oxygen bonds|MF	11/1733	60/17622	0.0305274	0.611651	0.596359	XS01G0012800/XS01G0014100/XS04G0167800/XS04G0167900/XS05G0233500/XS05G0260200/XS07G0282500/XS10G0113200/XS10G0113500/XS11G0224400/XS15G0110200	11
GO:0007399	nervous system development|BP	31/1733	223/17622	0.0306444	0.611651	0.596359	XS01G0209200/XS01G0219700/XS01G0245200/XS01G0336100/XS02G0047200/XS02G0138200/XS02G0225700/XS02G0226100/XS03G0084200/XS03G0172900/XS03G0245900/XS03G0247200/XS03G0322500/XS05G0030300/XS05G0162800/XS05G0167400/XS05G0240000/XS06G0079900/XS06G0127700/XS08G0092200/XS08G0093800/XS12G0007100/XS12G0042400/XS12G0230600/XS12G0254800/XS13G0154000/XS13G0195200/XS13G0263200/XS14G0018600/XS14G0024000/XS15G0107…	31
GO:0048581	negative regulation of post-embryonic development|BP	23/1733	156/17622	0.0318181	0.611651	0.596359	XS01G0172200/XS01G0294300/XS01G0304800/XS01G0330000/XS01G0363800/XS02G0115200/XS03G0269900/XS04G0098100/XS04G0154300/XS04G0239500/XS06G0246300/XS07G0143600/XS08G0050700/XS09G0186400/XS11G0065100/XS11G0084200/XS12G0105000/XS13G0141600/XS13G0168000/XS13G0194600/XSUnG0012000/XSUnG0139600/XSUnG0162800	23
GO:0045490	pectin catabolic process|BP	18/1733	115/17622	0.0318324	0.611651	0.596359	XS01G0297700/XS01G0297800/XS01G0351700/XS03G0000500/XS03G0057600/XS03G0168500/XS03G0288100/XS03G0303100/XS03G0303300/XS03G0318000/XS03G0328000/XS05G0058900/XS05G0083300/XS05G0151100/XS11G0154600/XS12G0101200/XSUnG0176100/XSUnG0222200	18
GO:0060322	head development|BP	12/1733	68/17622	0.0321516	0.611651	0.596359	XS02G0047200/XS03G0247200/XS03G0322500/XS05G0030300/XS05G0162800/XS05G0167400/XS06G0127700/XS08G0021500/XS12G0007100/XS12G0230600/XS13G0195200/XS13G0263200	12
GO:0003682	chromatin binding|MF	49/1733	382/17622	0.0322457	0.611651	0.596359	XS01G0238800/XS01G0301300/XS01G0389800/XS01G0401400/XS02G0036200/XS02G0047200/XS02G0174400/XS02G0203300/XS02G0225700/XS02G0226100/XS03G0106400/XS03G0161600/XS03G0234200/XS03G0235000/XS03G0247200/XS03G0280200/XS03G0322500/XS04G0120000/XS04G0202700/XS04G0260500/XS05G0010200/XS05G0164000/XS05G0177900/XS05G0258700/XS07G0001900/XS07G0040200/XS07G0094600/XS07G0262200/XS09G0022000/XS09G0023500/XS09G0222…	49
GO:0042545	cell wall modification|BP	37/1733	276/17622	0.0323491	0.611651	0.596359	XS01G0257500/XS01G0286600/XS01G0297700/XS01G0297800/XS01G0304800/XS03G0057600/XS03G0168500/XS03G0188900/XS03G0303100/XS03G0303300/XS03G0318000/XS03G0328000/XS03G0336200/XS05G0025000/XS05G0083300/XS05G0151100/XS05G0156200/XS05G0265400/XS06G0045400/XS07G0074300/XS07G0182500/XS07G0269800/XS08G0076800/XS10G0039200/XS11G0019100/XS11G0036600/XS11G0055300/XS11G0100700/XS11G0154600/XS11G0158300/XS12G0147…	37
GO:0007010	cytoskeleton organization|BP	57/1733	454/17622	0.0324086	0.611651	0.596359	XS01G0125000/XS01G0152600/XS01G0215300/XS01G0233700/XS01G0286400/XS01G0316200/XS01G0347500/XS02G0138200/XS02G0192000/XS02G0265500/XS02G0288900/XS03G0126800/XS03G0129000/XS03G0172900/XS03G0247200/XS03G0271500/XS03G0322000/XS03G0322100/XS04G0060600/XS04G0080700/XS04G0203500/XS04G0260000/XS05G0026200/XS05G0208100/XS05G0233500/XS05G0240000/XS06G0079900/XS06G0205500/XS06G0207700/XS06G0225000/XS07G0028…	57
GO:0031401	positive regulation of protein modification process|BP	21/1733	140/17622	0.0330452	0.611651	0.596359	XS01G0126700/XS01G0301300/XS02G0265500/XS03G0106400/XS03G0170300/XS03G0271500/XS04G0203500/XS04G0260000/XS07G0001900/XS08G0110600/XS08G0115900/XS10G0054900/XS11G0028400/XS12G0010300/XS12G0230600/XS12G0237700/XS13G0263200/XS14G0018600/XS15G0107100/XS15G0148700/XSUnG0192000	21
GO:0051338	regulation of transferase activity|BP	24/1733	165/17622	0.0331691	0.611651	0.596359	XS01G0125000/XS02G0265500/XS03G0107800/XS03G0201800/XS03G0313500/XS04G0219700/XS04G0221500/XS04G0260000/XS05G0176000/XS05G0213600/XS06G0127700/XS07G0035300/XS07G0071700/XS08G0115900/XS10G0054900/XS12G0010300/XS12G0048500/XS12G0230600/XS13G0263200/XS14G0018600/XS15G0107100/XS15G0148700/XSUnG0099600/XSUnG0192000	24
GO:0000785	chromatin|CC	30/1733	216/17622	0.0333709	0.611651	0.596359	XS01G0112800/XS01G0219700/XS01G0401400/XS02G0047200/XS02G0174400/XS02G0225700/XS02G0226100/XS03G0079300/XS03G0247200/XS03G0322500/XS04G0098100/XS04G0202700/XS04G0211300/XS05G0176000/XS05G0177900/XS05G0183500/XS08G0047600/XS09G0222100/XS10G0166400/XS10G0179000/XS10G0214100/XS12G0014300/XS12G0014500/XS12G0039500/XS12G0116600/XS13G0012800/XS13G0029100/XS14G0069500/XS14G0121300/XSUnG0181100	30
GO:0016682	oxidoreductase activity, acting on diphenols and related substances as donors, oxygen as acceptor|MF	11/1733	61/17622	0.0340544	0.620287	0.604779	XS06G0028000/XS06G0028300/XS06G0029000/XS09G0243800/XS12G0045900/XS12G0046100/XS12G0055300/XS13G0211600/XS14G0081900/XS14G0099100/XSUnG0231500	11
GO:0051258	protein polymerization|BP	22/1733	149/17622	0.0346752	0.62739	0.611705	XS01G0152600/XS01G0215300/XS01G0347500/XS02G0288900/XS03G0126800/XS03G0147300/XS03G0271500/XS03G0322000/XS03G0322100/XS04G0080700/XS04G0203500/XS05G0240000/XS06G0079900/XS06G0207700/XS06G0225000/XS08G0154400/XS11G0077900/XS12G0036900/XS13G0025900/XS13G0042100/XS14G0024000/XS14G0121300	22
GO:0090696	post-embryonic plant organ development|BP	53/1733	420/17622	0.0350304	0.62739	0.611705	XS01G0017900/XS01G0211400/XS01G0280600/XS01G0344200/XS03G0107800/XS03G0247200/XS03G0336200/XS03G0338400/XS04G0072500/XS04G0239500/XS04G0260000/XS04G0286200/XS05G0025000/XS05G0037400/XS05G0112300/XS05G0147600/XS05G0263700/XS05G0264100/XS06G0014800/XS06G0140700/XS06G0151600/XS06G0225000/XS07G0072800/XS07G0074300/XS07G0160900/XS08G0092200/XS08G0093800/XS08G0188200/XS09G0090100/XS10G0054900/XS10G0121…	53
GO:0022604	regulation of cell morphogenesis|BP	21/1733	141/17622	0.0353656	0.62739	0.611705	XS01G0125000/XS01G0246900/XS02G0047000/XS02G0138200/XS03G0010800/XS03G0271500/XS03G0308500/XS04G0203500/XS05G0252400/XS06G0018900/XS06G0079900/XS07G0071700/XS08G0076800/XS09G0030500/XS09G0031900/XS10G0097800/XS11G0042400/XS12G0079000/XS12G0230600/XS13G0263200/XS15G0107100	21
GO:0043549	regulation of kinase activity|BP	21/1733	141/17622	0.0353656	0.62739	0.611705	XS01G0125000/XS02G0265500/XS03G0201800/XS03G0313500/XS04G0219700/XS04G0221500/XS04G0260000/XS05G0213600/XS06G0127700/XS07G0035300/XS07G0071700/XS08G0115900/XS10G0054900/XS12G0010300/XS12G0230600/XS13G0263200/XS14G0018600/XS15G0107100/XS15G0148700/XSUnG0099600/XSUnG0192000	21
GO:0042578	phosphoric ester hydrolase activity|MF	45/1733	349/17622	0.035991	0.62739	0.611705	XS01G0044700/XS01G0347500/XS01G0367400/XS03G0204500/XS04G0079500/XS04G0219700/XS04G0229300/XS05G0065100/XS05G0099500/XS05G0136000/XS05G0140200/XS05G0140300/XS05G0197900/XS06G0085400/XS06G0088700/XS06G0119000/XS06G0122300/XS06G0262800/XS07G0013800/XS07G0063900/XS08G0143600/XS09G0119700/XS09G0122000/XS09G0185200/XS09G0235500/XS09G0235800/XS10G0010600/XS10G0154300/XS11G0217100/XS12G0027100/XS12G0065…	45
GO:0051020	GTPase binding|MF	13/1733	77/17622	0.0365731	0.62739	0.611705	XS01G0246900/XS01G0300800/XS03G0187400/XS04G0167900/XS05G0037400/XS05G0233500/XS06G0079900/XS07G0160900/XS11G0019100/XS12G0043100/XS12G0176600/XS12G0233900/XS14G0159100	13
GO:0046903	secretion|BP	22/1733	150/17622	0.0370046	0.62739	0.611705	XS01G0286400/XS02G0007000/XS02G0192000/XS02G0264100/XS03G0178100/XS03G0203000/XS05G0240000/XS06G0079900/XS06G0084500/XS06G0120300/XS08G0046900/XS08G0110600/XS08G0154400/XS09G0069000/XS12G0111000/XS12G0180300/XS13G0263200/XS14G0006900/XS14G0024000/XS14G0039800/XS14G0039900/XSUnG0029800	22
GO:0005798	Golgi-associated vesicle|CC	14/1733	85/17622	0.0371774	0.62739	0.611705	XS01G0000500/XS01G0232100/XS01G0300800/XS04G0046100/XS04G0260000/XS08G0115900/XS09G0181300/XS09G0220400/XS09G0221600/XS10G0198800/XS12G0010300/XS12G0233900/XS13G0263200/XS14G0108100	14
GO:0032271	regulation of protein polymerization|BP	14/1733	85/17622	0.0371774	0.62739	0.611705	XS01G0152600/XS01G0215300/XS01G0347500/XS02G0288900/XS03G0126800/XS04G0080700/XS05G0240000/XS06G0079900/XS06G0225000/XS08G0154400/XS11G0077900/XS13G0042100/XS14G0024000/XS14G0121300	14
GO:0019829	cation-transporting ATPase activity|MF	16/1733	101/17622	0.0374966	0.62739	0.611705	XS01G0210700/XS01G0286600/XS03G0215200/XS03G0215400/XS03G0262100/XS04G0268300/XS04G0286900/XS06G0115500/XS07G0086500/XS08G0246100/XS09G0003700/XS09G0168000/XS13G0030300/XS13G0062200/XSUnG0029800/XSUnG0101700	16
GO:0032270	positive regulation of cellular protein metabolic process|BP	28/1733	201/17622	0.0375101	0.62739	0.611705	XS01G0053300/XS01G0126700/XS01G0301300/XS01G0330000/XS02G0265500/XS03G0106400/XS03G0170300/XS03G0271500/XS04G0203500/XS04G0260000/XS04G0287900/XS07G0001900/XS08G0110600/XS08G0115900/XS08G0251800/XS09G0175100/XS10G0054900/XS11G0028400/XS12G0010300/XS12G0230600/XS12G0237700/XS13G0002200/XS13G0114100/XS13G0263200/XS14G0018600/XS15G0107100/XS15G0148700/XSUnG0192000	28
GO:0030659	cytoplasmic vesicle membrane|CC	24/1733	167/17622	0.0375214	0.62739	0.611705	XS01G0000500/XS01G0139800/XS01G0232100/XS01G0249100/XS02G0125000/XS03G0129000/XS03G0189000/XS03G0283800/XS03G0285100/XS04G0260000/XS04G0262300/XS05G0030300/XS05G0044800/XS06G0034100/XS08G0115900/XS09G0181300/XS09G0220400/XS09G0221600/XS09G0232100/XS10G0198800/XS12G0010300/XS14G0029800/XS14G0108100/XS15G0148700	24
GO:0016791	phosphatase activity|MF	39/1733	297/17622	0.0379239	0.62739	0.611705	XS01G0044700/XS01G0347500/XS01G0367400/XS03G0204500/XS04G0079500/XS04G0219700/XS04G0229300/XS05G0065100/XS05G0099500/XS05G0136000/XS05G0140200/XS05G0140300/XS05G0197900/XS06G0085400/XS06G0088700/XS06G0119000/XS06G0122300/XS06G0262800/XS07G0063900/XS08G0143600/XS09G0185200/XS09G0235500/XS09G0235800/XS10G0010600/XS11G0217100/XS12G0027100/XS12G0065100/XS12G0096600/XS12G0103700/XS12G0153100/XS12G0230…	39
GO:0010118	stomatal movement|BP	25/1733	176/17622	0.038756	0.627472	0.611785	XS01G0001900/XS01G0137000/XS03G0161600/XS03G0261000/XS04G0003000/XS04G0003700/XS04G0014600/XS04G0046100/XS04G0242400/XS06G0084500/XS07G0013800/XS07G0029300/XS09G0003700/XS09G0185200/XS09G0202100/XS09G0209400/XS10G0097800/XS10G0103200/XS10G0160000/XS11G0055300/XS11G0221900/XS13G0141600/XS13G0194600/XS15G0170000/XSUnG0012000	25
GO:0030838	positive regulation of actin filament polymerization|BP	12/1733	70/17622	0.0392323	0.627472	0.611785	XS01G0152600/XS01G0215300/XS01G0347500/XS02G0288900/XS03G0126800/XS04G0080700/XS05G0240000/XS06G0079900/XS06G0225000/XS11G0077900/XS13G0042100/XS14G0121300	12
GO:0097237	cellular response to toxic substance|BP	13/1733	78/17622	0.0400903	0.627472	0.611785	XS08G0024700/XS08G0047600/XS10G0009200/XS10G0009300/XS10G0009400/XS10G0114900/XS11G0222000/XS11G0222100/XS11G0222300/XS11G0222500/XS11G0222700/XS13G0083400/XS15G0107100	13
GO:0006888	ER to Golgi vesicle-mediated transport|BP	17/1733	110/17622	0.0402655	0.627472	0.611785	XS01G0000500/XS01G0232100/XS01G0300800/XS02G0166300/XS02G0264100/XS05G0019300/XS06G0120300/XS09G0003000/XS09G0181300/XS10G0198800/XS11G0192000/XS12G0233900/XS13G0149000/XS13G0149200/XS13G0154000/XS13G0172100/XSUnG0141200	17
GO:0009739	response to gibberellin|BP	32/1733	237/17622	0.0404617	0.627472	0.611785	XS01G0238800/XS01G0294300/XS01G0295400/XS01G0295500/XS01G0301300/XS01G0363800/XS01G0376400/XS01G0389800/XS02G0096100/XS03G0247200/XS03G0280200/XS03G0322700/XS04G0239900/XS05G0069800/XS05G0258700/XS06G0006500/XS07G0001900/XS07G0022500/XS07G0094600/XS07G0262200/XS08G0050700/XS08G0063600/XS08G0138900/XS09G0222100/XS10G0174600/XS11G0202600/XS12G0105000/XS12G0115000/XS12G0237700/XS13G0030300/XS13G0141…	32
GO:0001934	positive regulation of protein phosphorylation|BP	14/1733	86/17622	0.0405449	0.627472	0.611785	XS02G0265500/XS03G0271500/XS04G0203500/XS04G0260000/XS08G0115900/XS10G0054900/XS11G0028400/XS12G0010300/XS12G0230600/XS13G0263200/XS14G0018600/XS15G0107100/XS15G0148700/XSUnG0192000	14
GO:0022853	active ion transmembrane transporter activity|MF	16/1733	102/17622	0.0405721	0.627472	0.611785	XS01G0210700/XS01G0286600/XS03G0215200/XS03G0215400/XS03G0262100/XS04G0268300/XS04G0286900/XS06G0115500/XS07G0086500/XS08G0246100/XS09G0003700/XS09G0168000/XS13G0030300/XS13G0062200/XSUnG0029800/XSUnG0101700	16
GO:0042625	ATPase coupled ion transmembrane transporter activity|MF	16/1733	102/17622	0.0405721	0.627472	0.611785	XS01G0210700/XS01G0286600/XS03G0215200/XS03G0215400/XS03G0262100/XS04G0268300/XS04G0286900/XS06G0115500/XS07G0086500/XS08G0246100/XS09G0003700/XS09G0168000/XS13G0030300/XS13G0062200/XSUnG0029800/XSUnG0101700	16
GO:0046906	tetrapyrrole binding|MF	59/1733	479/17622	0.0413552	0.627472	0.611785	XS01G0005700/XS01G0200000/XS01G0348200/XS01G0385100/XS02G0029100/XS02G0053300/XS02G0256300/XS02G0273900/XS03G0151600/XS04G0059900/XS04G0060300/XS04G0194000/XS04G0251100/XS04G0273800/XS05G0004000/XS05G0018600/XS05G0024000/XS05G0026200/XS05G0040700/XS06G0164300/XS07G0055300/XS07G0081600/XS07G0183900/XS07G0207200/XS07G0209000/XS07G0210600/XS07G0212500/XS07G0221900/XS07G0267000/XS07G0269300/XS08G0021…	59
GO:0033044	regulation of chromosome organization|BP	26/1733	186/17622	0.0421876	0.627472	0.611785	XS01G0126700/XS01G0209200/XS01G0219700/XS01G0301300/XS02G0067500/XS02G0192000/XS02G0225700/XS02G0226100/XS03G0106400/XS03G0126800/XS03G0170300/XS03G0245900/XS05G0109700/XS06G0246300/XS07G0001900/XS10G0186600/XS11G0028400/XS12G0034300/XS12G0116600/XS12G0237700/XS13G0168000/XS13G0195200/XS13G0223400/XS14G0121300/XS15G0028400/XSUnG0224300	26
GO:0031406	carboxylic acid binding|MF	24/1733	169/17622	0.0422849	0.627472	0.611785	XS01G0168700/XS01G0281900/XS03G0187400/XS03G0249500/XS03G0292600/XS05G0081800/XS05G0246100/XS06G0029000/XS06G0048800/XS07G0221400/XS08G0115900/XS09G0149000/XS10G0009200/XS10G0009300/XS10G0009400/XS10G0114900/XS10G0152600/XS11G0178900/XS11G0222000/XS11G0222100/XS11G0222300/XS11G0222500/XS11G0222700/XS13G0020800	24
GO:0016131	brassinosteroid metabolic process|BP	13/1733	79/17622	0.0438394	0.632229	0.616423	XS01G0348200/XS03G0037800/XS05G0026200/XS05G0095200/XS06G0140700/XS07G0221900/XS11G0004800/XS12G0017900/XS12G0018200/XS12G0018600/XS12G0026900/XS12G0092200/XS14G0043700	13
GO:0010562	positive regulation of phosphorus metabolic process|BP	15/1733	95/17622	0.0440952	0.632229	0.616423	XS02G0265500/XS03G0271500/XS04G0203500/XS04G0221500/XS04G0260000/XS08G0115900/XS10G0054900/XS11G0028400/XS12G0010300/XS12G0230600/XS13G0263200/XS14G0018600/XS15G0107100/XS15G0148700/XSUnG0192000	15
GO:0016050	vesicle organization|BP	15/1733	95/17622	0.0440952	0.632229	0.616423	XS01G0232100/XS01G0320900/XS02G0047100/XS02G0138200/XS02G0264100/XS03G0178100/XS03G0203000/XS04G0046100/XS04G0260000/XS04G0276200/XS06G0084500/XS06G0120300/XS08G0046900/XS11G0192000/XS12G0010300	15
GO:0045937	positive regulation of phosphate metabolic process|BP	15/1733	95/17622	0.0440952	0.632229	0.616423	XS02G0265500/XS03G0271500/XS04G0203500/XS04G0221500/XS04G0260000/XS08G0115900/XS10G0054900/XS11G0028400/XS12G0010300/XS12G0230600/XS13G0263200/XS14G0018600/XS15G0107100/XS15G0148700/XSUnG0192000	15
GO:0004650	polygalacturonase activity|MF	11/1733	64/17622	0.0463378	0.655525	0.639136	XS01G0351700/XS01G0366500/XS03G0000500/XS03G0165600/XS03G0256600/XS03G0308300/XS05G0083300/XS05G0151100/XS09G0121800/XS11G0100700/XSUnG0222200	11
GO:0019915	lipid storage|BP	11/1733	64/17622	0.0463378	0.655525	0.639136	XS05G0142100/XS06G0114900/XS09G0026800/XS09G0231000/XS12G0068800/XS12G0105000/XS12G0116600/XS14G0121300/XS15G0168100/XSUnG0139600/XSUnG0149500	11
GO:0071900	regulation of protein serine/threonine kinase activity|BP	16/1733	104/17622	0.0472583	0.659751	0.643256	XS02G0265500/XS03G0201800/XS03G0313500/XS04G0219700/XS04G0260000/XS06G0127700/XS07G0035300/XS07G0071700/XS08G0115900/XS10G0054900/XS12G0010300/XS12G0230600/XS13G0263200/XS15G0148700/XSUnG0099600/XSUnG0192000	16
GO:0043177	organic acid binding|MF	24/1733	171/17622	0.0474786	0.660653	0.644136	XS01G0168700/XS01G0281900/XS03G0187400/XS03G0249500/XS03G0292600/XS05G0081800/XS05G0246100/XS06G0029000/XS06G0048800/XS07G0221400/XS08G0115900/XS09G0149000/XS10G0009200/XS10G0009300/XS10G0009400/XS10G0114900/XS10G0152600/XS11G0178900/XS11G0222000/XS11G0222100/XS11G0222300/XS11G0222500/XS11G0222700/XS13G0020800	24
GO:0051248	negative regulation of protein metabolic process|BP	21/1733	146/17622	0.0488091	0.666689	0.650021	XS01G0025400/XS01G0301300/XS02G0047200/XS03G0106400/XS04G0121200/XS04G0167900/XS04G0219700/XS05G0030300/XS05G0233500/XS07G0001900/XS07G0071700/XS12G0034300/XS12G0065200/XS12G0197400/XS12G0230600/XS12G0233500/XS13G0168000/XS13G0223400/XS13G0263200/XS14G0052000/XSUnG0099600	21
GO:0005681	spliceosomal complex|CC	23/1733	163/17622	0.0489436	0.666689	0.650021	XS01G0034100/XS01G0233700/XS01G0401400/XS03G0084200/XS03G0095800/XS03G0171300/XS03G0256500/XS05G0153400/XS05G0177900/XS08G0047600/XS08G0160100/XS08G0223500/XS09G0112400/XS10G0053100/XS11G0028400/XS12G0007100/XS12G0020500/XS12G0252600/XS14G0052000/XS14G0061000/XS14G0121300/XS15G0029300/XSUnG0181100	23
GO:0097435	supramolecular fiber organization|BP	32/1733	241/17622	0.0491066	0.666689	0.650021	XS01G0125000/XS01G0152600/XS01G0215300/XS01G0233700/XS01G0286400/XS01G0316200/XS01G0347500/XS02G0138200/XS02G0288900/XS03G0126800/XS03G0172900/XS03G0271500/XS03G0322000/XS03G0322100/XS04G0080700/XS04G0203500/XS05G0240000/XS06G0079900/XS06G0207700/XS06G0225000/XS08G0007000/XS08G0154400/XS10G0103200/XS10G0134600/XS11G0077900/XS12G0065200/XS12G0230600/XS13G0042100/XS13G0154000/XS14G0024000/XS14G0121…	32
GO:0009827	plant-type cell wall modification|BP	18/1733	121/17622	0.0491357	0.666689	0.650021	XS01G0304800/XS03G0336200/XS05G0025000/XS05G0083300/XS05G0151100/XS05G0156200/XS07G0074300/XS07G0182500/XS07G0269800/XS08G0076800/XS10G0039200/XS11G0036600/XS11G0055300/XS11G0100700/XS11G0158300/XS12G0147900/XS13G0066800/XSUnG0228900	18
GO:0051247	positive regulation of protein metabolic process|BP	29/1733	215/17622	0.049686	0.666689	0.650021	XS01G0053300/XS01G0126700/XS01G0301300/XS01G0330000/XS02G0264100/XS02G0265500/XS03G0106400/XS03G0170300/XS03G0271500/XS04G0203500/XS04G0260000/XS04G0287900/XS07G0001900/XS08G0110600/XS08G0115900/XS08G0251800/XS09G0175100/XS10G0054900/XS11G0028400/XS12G0010300/XS12G0230600/XS12G0237700/XS13G0002200/XS13G0114100/XS13G0263200/XS14G0018600/XS15G0107100/XS15G0148700/XSUnG0192000	29

## Sheet: Supplementary Table 5
Supplementary Table 5. GO enrichment of genes specifically expressed in leaf.
GO	Description	GeneRatio	BgRatio	pvalue	p.adjust	qvalue	geneID	Count
GO:0098796	membrane protein complex|CC	123/2857	482/17622	8.02001e-08	0.000364429	0.000347393	XS01G0004600/XS01G0046100/XS01G0163500/XS01G0194300/XS01G0217100/XS01G0228500/XS01G0234200/XS01G0234400/XS01G0273300/XS01G0283200/XS01G0290200/XS01G0369300/XS01G0381700/XS01G0409700/XS02G0000100/XS02G0051500/XS02G0054800/XS02G0080200/XS03G0001400/XS03G0137600/XS03G0213800/XS03G0217000/XS03G0223800/XS03G0232700/XS03G0251200/XS03G0299800/XS03G0321400/XS04G0029200/XS04G0030300/XS04G0065500/XS04G0104…	123
GO:0006661	phosphatidylinositol biosynthetic process|BP	26/2857	70/17622	1.84069e-05	0.0181446	0.0172964	XS01G0046100/XS01G0110400/XS01G0194300/XS01G0234400/XS02G0112900/XS03G0152500/XS04G0157300/XS05G0144900/XS06G0246100/XS07G0008200/XS08G0075500/XS08G0109000/XS08G0139800/XS08G0243500/XS10G0011400/XS10G0178100/XS10G0178300/XS11G0155900/XS11G0157200/XS11G0157800/XS11G0220300/XS12G0191100/XS14G0027700/XS14G0080100/XSUnG0032800/XSUnG0093300	26
GO:0007067	NA	44/2857	146/17622	1.84508e-05	0.0181446	0.0172964	XS01G0129800/XS01G0182400/XS01G0183100/XS01G0183400/XS01G0300200/XS01G0375500/XS01G0376000/XS02G0055400/XS02G0078600/XS02G0135700/XS02G0205300/XS02G0206700/XS03G0265200/XS04G0056500/XS04G0057500/XS04G0229600/XS05G0179300/XS05G0266100/XS06G0082600/XS07G0008700/XS07G0079600/XS07G0092500/XS07G0092700/XS07G0108400/XS07G0191800/XS08G0100500/XS08G0191900/XS08G0205400/XS09G0183800/XS11G0047000/XS11G0118…	44
GO:0046474	glycerophospholipid biosynthetic process|BP	44/2857	148/17622	2.67597e-05	0.0181446	0.0172964	XS01G0046100/XS01G0110400/XS01G0194300/XS01G0234400/XS01G0295000/XS01G0369000/XS01G0390500/XS02G0112900/XS03G0152500/XS03G0244100/XS04G0047500/XS04G0157300/XS05G0038100/XS05G0038200/XS05G0144900/XS06G0126000/XS06G0246100/XS07G0008200/XS08G0075500/XS08G0109000/XS08G0139800/XS08G0140400/XS08G0140600/XS08G0243500/XS10G0011400/XS10G0160400/XS10G0178100/XS10G0178300/XS11G0155900/XS11G0157200/XS11G0157…	44
GO:0008654	phospholipid biosynthetic process|BP	82/2857	329/17622	2.82904e-05	0.0181446	0.0172964	XS01G0000100/XS01G0046100/XS01G0080500/XS01G0110400/XS01G0141700/XS01G0194300/XS01G0207600/XS01G0231800/XS01G0234400/XS01G0238600/XS01G0295000/XS01G0304400/XS01G0323000/XS01G0369000/XS01G0390500/XS02G0023500/XS02G0080200/XS02G0112900/XS03G0031100/XS03G0095200/XS03G0095300/XS03G0152500/XS03G0212000/XS03G0244100/XS04G0047500/XS04G0054000/XS04G0054100/XS04G0054400/XS04G0055200/XS04G0055600/XS04G0157…	82
GO:0007219	Notch signaling pathway|BP	15/2857	31/17622	3.01165e-05	0.0181446	0.0172964	XS03G0011300/XS04G0079700/XS04G0104100/XS04G0192700/XS04G0227900/XS05G0243100/XS06G0084400/XS08G0081100/XS09G0231600/XS11G0034300/XS12G0024100/XS12G0155400/XS13G0138600/XSUnG0011100/XSUnG0224400	15
GO:0006497	protein lipidation|BP	28/2857	80/17622	3.19447e-05	0.0181446	0.0172964	XS01G0046100/XS01G0194300/XS01G0234400/XS01G0273300/XS02G0019400/XS02G0145400/XS03G0217000/XS04G0157300/XS04G0202800/XS04G0227900/XS05G0110600/XS05G0164700/XS06G0246100/XS06G0259800/XS07G0008200/XS08G0114800/XS08G0243500/XS09G0162400/XS09G0228100/XS10G0011400/XS10G0203400/XS11G0157200/XS11G0157800/XS13G0139200/XS14G0027700/XS14G0033600/XSUnG0093300/XSUnG0143600	28
GO:0042158	lipoprotein biosynthetic process|BP	28/2857	80/17622	3.19447e-05	0.0181446	0.0172964	XS01G0046100/XS01G0194300/XS01G0234400/XS01G0273300/XS02G0019400/XS02G0145400/XS03G0217000/XS04G0157300/XS04G0202800/XS04G0227900/XS05G0110600/XS05G0164700/XS06G0246100/XS06G0259800/XS07G0008200/XS08G0114800/XS08G0243500/XS09G0162400/XS09G0228100/XS10G0011400/XS10G0203400/XS11G0157200/XS11G0157800/XS13G0139200/XS14G0027700/XS14G0033600/XSUnG0093300/XSUnG0143600	28
GO:0017004	cytochrome complex assembly|BP	13/2857	25/17622	3.90866e-05	0.0197344	0.0188119	XS01G0207600/XS01G0348000/XS03G0247100/XS04G0278500/XS05G0002800/XS05G0066600/XS05G0066900/XS11G0186400/XS12G0071100/XS14G0030400/XS15G0115700/XSPtG0001500/XSPtG0005100	13
GO:0044436	thylakoid part|CC	105/2857	450/17622	4.70339e-05	0.0213722	0.0203731	XS01G0053000/XS01G0080500/XS01G0104300/XS01G0170900/XS01G0202800/XS01G0207600/XS01G0295000/XS01G0309700/XS01G0328300/XS01G0401800/XS02G0027900/XS02G0071500/XS02G0080200/XS03G0075900/XS03G0091100/XS03G0213800/XS03G0289000/XS03G0321400/XS03G0335400/XS04G0001900/XS04G0045800/XS04G0046000/XS04G0134500/XS04G0167000/XS04G0171900/XS04G0198500/XS04G0274600/XS05G0002800/XS05G0008000/XS05G0066600/XS05G0066…	105
GO:0009535	chloroplast thylakoid membrane|CC	96/2857	409/17622	7.71463e-05	0.0292127	0.0278471	XS01G0053000/XS01G0080500/XS01G0104300/XS01G0170900/XS01G0202800/XS01G0207600/XS01G0295000/XS01G0309700/XS01G0328300/XS01G0401800/XS02G0071500/XS02G0080200/XS03G0091100/XS03G0213800/XS03G0289000/XS03G0321400/XS04G0001900/XS04G0045800/XS04G0046000/XS04G0134500/XS04G0167000/XS04G0171900/XS04G0274600/XS05G0002800/XS05G0008000/XS05G0066600/XS05G0066900/XS05G0150700/XS05G0246900/XS06G0009000/XS06G0022…	96
GO:0055035	plastid thylakoid membrane|CC	96/2857	409/17622	7.71463e-05	0.0292127	0.0278471	XS01G0053000/XS01G0080500/XS01G0104300/XS01G0170900/XS01G0202800/XS01G0207600/XS01G0295000/XS01G0309700/XS01G0328300/XS01G0401800/XS02G0071500/XS02G0080200/XS03G0091100/XS03G0213800/XS03G0289000/XS03G0321400/XS04G0001900/XS04G0045800/XS04G0046000/XS04G0134500/XS04G0167000/XS04G0171900/XS04G0274600/XS05G0002800/XS05G0008000/XS05G0066600/XS05G0066900/XS05G0150700/XS05G0246900/XS06G0009000/XS06G0022…	96
GO:0034357	photosynthetic membrane|CC	99/2857	427/17622	9.87402e-05	0.0312282	0.0297683	XS01G0053000/XS01G0080500/XS01G0104300/XS01G0170900/XS01G0202800/XS01G0207600/XS01G0295000/XS01G0309700/XS01G0328300/XS01G0401800/XS02G0071500/XS02G0080200/XS03G0091100/XS03G0213800/XS03G0289000/XS03G0321400/XS04G0001900/XS04G0045800/XS04G0046000/XS04G0134500/XS04G0167000/XS04G0171900/XS04G0198500/XS04G0274600/XS05G0002800/XS05G0008000/XS05G0066600/XS05G0066900/XS05G0150700/XS05G0246900/XS06G0009…	99
GO:0070588	calcium ion transmembrane transport|BP	22/2857	60/17622	9.92706e-05	0.0312282	0.0297683	XS02G0001500/XS03G0228700/XS03G0236200/XS03G0236800/XS03G0251200/XS04G0104100/XS06G0058600/XS06G0058800/XS06G0059100/XS06G0059200/XS06G0070000/XS06G0070100/XS06G0147000/XS06G0147300/XS06G0154500/XS08G0112000/XS09G0001100/XS15G0098900/XS15G0099200/XS15G0120500/XS15G0132800/XSUnG0219800	22
GO:0042157	lipoprotein metabolic process|BP	29/2857	89/17622	0.000103188	0.0312282	0.0297683	XS01G0046100/XS01G0194300/XS01G0234400/XS01G0273300/XS02G0019400/XS02G0145400/XS03G0217000/XS04G0157300/XS04G0202800/XS04G0227900/XS05G0110600/XS05G0164700/XS06G0246100/XS06G0259800/XS07G0008200/XS08G0114800/XS08G0243500/XS09G0162400/XS09G0228100/XS10G0011400/XS10G0203400/XS11G0157200/XS11G0157800/XS13G0139200/XS14G0027700/XS14G0033600/XSUnG0093300/XSUnG0143600/XSUnG0200700	29
GO:0042651	thylakoid membrane|CC	98/2857	423/17622	0.000109958	0.0312282	0.0297683	XS01G0053000/XS01G0080500/XS01G0104300/XS01G0170900/XS01G0202800/XS01G0207600/XS01G0295000/XS01G0309700/XS01G0328300/XS01G0401800/XS02G0071500/XS02G0080200/XS03G0091100/XS03G0213800/XS03G0289000/XS03G0321400/XS04G0001900/XS04G0045800/XS04G0046000/XS04G0134500/XS04G0167000/XS04G0171900/XS04G0274600/XS05G0002800/XS05G0008000/XS05G0066600/XS05G0066900/XS05G0150700/XS05G0246900/XS06G0009000/XS06G0022…	98
GO:0009521	photosystem|CC	29/2857	91/17622	0.000160286	0.0382924	0.0365023	XS02G0080200/XS03G0213800/XS03G0321400/XS04G0198500/XS05G0150700/XS06G0009000/XS06G0022000/XS07G0069900/XS10G0204800/XS11G0025600/XS13G0219300/XS15G0130400/XS15G0143600/XSPtG0000300/XSPtG0001600/XSPtG0002300/XSPtG0002700/XSPtG0004200/XSPtG0004600/XSPtG0004700/XSPtG0004800/XSPtG0004900/XSPtG0005400/XSPtG0005900/XSPtG0006000/XSPtG0006100/XSPtG0009400/XSUnG0045100/XSUnG0211300	29
GO:0045017	glycerolipid biosynthetic process|BP	51/2857	192/17622	0.00016854	0.0382924	0.0365023	XS01G0046100/XS01G0110400/XS01G0180100/XS01G0181000/XS01G0181400/XS01G0194300/XS01G0234400/XS01G0295000/XS01G0369000/XS01G0390500/XS02G0112900/XS03G0152500/XS03G0244100/XS04G0047500/XS04G0157300/XS05G0038100/XS05G0038200/XS05G0144900/XS06G0126000/XS06G0246100/XS07G0008200/XS07G0282300/XS08G0075500/XS08G0109000/XS08G0139800/XS08G0140400/XS08G0140600/XS08G0243500/XS09G0085200/XS10G0011400/XS10G0160…	51
GO:0009668	plastid membrane organization|BP	38/2857	132/17622	0.000192484	0.0397566	0.0378981	XS01G0080500/XS01G0207600/XS01G0238600/XS01G0241100/XS02G0023500/XS03G0244100/XS03G0277200/XS03G0299800/XS04G0112700/XS05G0038100/XS05G0038200/XS05G0067500/XS05G0246900/XS06G0013800/XS07G0069900/XS07G0246300/XS07G0255100/XS07G0297900/XS11G0023100/XS11G0025700/XS11G0158800/XS12G0013600/XS12G0044800/XS12G0239200/XS13G0003600/XS13G0015700/XS13G0021900/XS13G0047500/XS13G0051100/XS13G0052300/XS13G0185…	38
GO:0010027	thylakoid membrane organization|BP	38/2857	132/17622	0.000192484	0.0397566	0.0378981	XS01G0080500/XS01G0207600/XS01G0238600/XS01G0241100/XS02G0023500/XS03G0244100/XS03G0277200/XS03G0299800/XS04G0112700/XS05G0038100/XS05G0038200/XS05G0067500/XS05G0246900/XS06G0013800/XS07G0069900/XS07G0246300/XS07G0255100/XS07G0297900/XS11G0023100/XS11G0025700/XS11G0158800/XS12G0013600/XS12G0044800/XS12G0239200/XS13G0003600/XS13G0015700/XS13G0021900/XS13G0047500/XS13G0051100/XS13G0052300/XS13G0185…	38
GO:0044403	symbiont process|BP	93/2857	404/17622	0.000206243	0.0407464	0.0388416	XS01G0003900/XS01G0032100/XS01G0127600/XS01G0163500/XS01G0186700/XS01G0300200/XS01G0361500/XS01G0372000/XS01G0378300/XS01G0383500/XS01G0389200/XS02G0018800/XS02G0279100/XS03G0007900/XS03G0008300/XS03G0030200/XS03G0031500/XS03G0157800/XS03G0202800/XS03G0250700/XS03G0260000/XS03G0264800/XS03G0333400/XS04G0077600/XS04G0176900/XS04G0192700/XS04G0198900/XS04G0199100/XS04G0204500/XS04G0227900/XS04G0236…	93
GO:0019722	calcium-mediated signaling|BP	23/2857	67/17622	0.000219532	0.0415647	0.0396217	XS01G0272900/XS01G0373000/XS02G0001500/XS03G0236200/XS03G0236800/XS04G0104100/XS04G0165500/XS06G0013000/XS06G0058600/XS06G0058800/XS06G0059100/XS06G0059200/XS06G0070000/XS06G0070100/XS06G0147000/XS06G0147300/XS06G0154500/XS08G0196000/XS13G0068000/XS13G0132200/XS15G0098900/XS15G0099200/XS15G0120500	23
GO:0000911	cytokinesis by cell plate formation|BP	44/2857	161/17622	0.000231813	0.0421343	0.0401646	XS01G0005000/XS01G0106400/XS01G0263900/XS01G0300200/XS01G0364400/XS01G0371600/XS01G0375500/XS01G0376000/XS01G0401800/XS02G0055400/XS02G0078600/XS02G0112900/XS02G0123200/XS02G0135700/XS03G0174100/XS03G0223800/XS04G0134400/XS04G0285300/XS05G0032100/XS05G0148800/XS06G0013000/XS06G0063800/XS06G0182500/XS07G0092500/XS07G0115800/XS07G0115900/XS08G0091000/XS08G0135200/XS09G0137200/XS10G0070800/XS11G0084…	44
GO:0006260	DNA replication|BP	80/2857	340/17622	0.000270006	0.0471887	0.0449827	XS01G0032100/XS01G0112600/XS01G0203900/XS01G0275800/XS01G0319400/XS01G0372000/XS01G0375500/XS01G0376000/XS01G0384400/XS02G0078600/XS02G0100300/XS03G0148600/XS03G0172100/XS03G0242800/XS03G0263900/XS03G0265200/XS03G0267100/XS03G0297400/XS03G0325800/XS04G0029800/XS04G0123300/XS04G0172100/XS04G0198400/XS04G0232600/XS04G0236600/XS04G0263100/XS04G0275900/XS05G0007800/XS05G0069900/XS05G0127800/XS05G0148…	80
GO:1902410	mitotic cytokinetic process|BP	47/2857	177/17622	0.00029947	0.0487157	0.0464384	XS01G0005000/XS01G0106400/XS01G0263900/XS01G0300200/XS01G0364400/XS01G0371600/XS01G0375500/XS01G0376000/XS01G0401800/XS02G0055400/XS02G0078600/XS02G0112900/XS02G0123200/XS02G0135700/XS03G0174100/XS03G0223800/XS04G0134400/XS04G0285300/XS05G0000800/XS05G0032100/XS05G0148800/XS06G0013000/XS06G0063800/XS06G0182500/XS07G0092500/XS07G0115800/XS07G0115900/XS08G0091000/XS08G0135200/XS08G0221400/XS09G0137…	47
GO:0003755	peptidyl-prolyl cis-trans isomerase activity|MF	21/2857	60/17622	0.000300185	0.0487157	0.0464384	XS01G0006200/XS01G0301800/XS02G0022200/XS02G0149200/XS03G0260000/XS03G0292200/XS03G0335400/XS05G0046900/XS06G0198000/XS06G0198100/XS07G0134100/XS08G0011200/XS10G0212900/XS11G0224100/XS12G0035800/XS13G0010600/XS13G0067500/XS14G0143500/XS14G0176500/XS15G0124700/XSUnG0033200	21
GO:0061024	membrane organization|BP	72/2857	301/17622	0.000320501	0.0502192	0.0478715	XS01G0080500/XS01G0163500/XS01G0207600/XS01G0238600/XS01G0241100/XS01G0305500/XS01G0322800/XS01G0381700/XS02G0023500/XS03G0003600/XS03G0223800/XS03G0244100/XS03G0252000/XS03G0277200/XS03G0299800/XS04G0112700/XS04G0134400/XS04G0172100/XS04G0198900/XS04G0199100/XS05G0032100/XS05G0038100/XS05G0038200/XS05G0067500/XS05G0076500/XS05G0246900/XS06G0013800/XS07G0069900/XS07G0213000/XS07G0246300/XS07G0255…	72
GO:0032506	cytokinetic process|BP	48/2857	183/17622	0.000353251	0.0524938	0.0500399	XS01G0005000/XS01G0106400/XS01G0263900/XS01G0300200/XS01G0364400/XS01G0371600/XS01G0375500/XS01G0376000/XS01G0401800/XS02G0055400/XS02G0078600/XS02G0112900/XS02G0123200/XS02G0135700/XS03G0174100/XS03G0223800/XS04G0134400/XS04G0285300/XS05G0000800/XS05G0032100/XS05G0148800/XS06G0013000/XS06G0063800/XS06G0182500/XS07G0092500/XS07G0092700/XS07G0115800/XS07G0115900/XS08G0091000/XS08G0135200/XS08G0221…	48
GO:0009523	photosystem II|CC	23/2857	69/17622	0.000358122	0.0524938	0.0500399	XS02G0080200/XS03G0213800/XS03G0321400/XS04G0198500/XS05G0150700/XS06G0022000/XS07G0069900/XS11G0025600/XS13G0219300/XS15G0130400/XS15G0143600/XSPtG0000300/XSPtG0001600/XSPtG0002300/XSPtG0004600/XSPtG0004700/XSPtG0004800/XSPtG0004900/XSPtG0005900/XSPtG0006000/XSPtG0006100/XSUnG0045100/XSUnG0211300	23
GO:0016032	viral process|BP	66/2857	274/17622	0.000454168	0.0644919	0.061477	XS01G0003900/XS01G0032100/XS01G0127600/XS01G0163500/XS01G0186700/XS01G0361500/XS01G0383500/XS01G0389200/XS02G0018800/XS02G0279100/XS03G0008300/XS03G0030200/XS03G0031500/XS03G0157800/XS03G0202800/XS03G0260000/XS04G0176900/XS04G0192700/XS04G0198900/XS04G0199100/XS04G0227900/XS04G0236600/XS05G0018300/XS05G0076500/XS05G0105800/XS05G0263900/XS06G0123500/XS06G0135600/XS06G0182000/XS06G0194000/XS06G0259…	66
GO:0010583	response to cyclopentenone|BP	12/2857	27/17622	0.000508975	0.0645659	0.0615476	XS01G0000800/XS01G0364400/XS02G0078600/XS03G0174100/XS04G0134400/XS05G0148800/XS08G0091000/XS11G0011300/XS11G0023100/XS13G0018800/XS13G0169400/XS15G0009400	12
GO:0006644	phospholipid metabolic process|BP	92/2857	410/17622	0.000550996	0.0658875	0.0628074	XS01G0000100/XS01G0046100/XS01G0080500/XS01G0098700/XS01G0110400/XS01G0141700/XS01G0155500/XS01G0194300/XS01G0207600/XS01G0231800/XS01G0234400/XS01G0238600/XS01G0295000/XS01G0304400/XS01G0323000/XS01G0369000/XS01G0390500/XS01G0399600/XS02G0023500/XS02G0080200/XS02G0112900/XS03G0031100/XS03G0095200/XS03G0095300/XS03G0152500/XS03G0212000/XS03G0244100/XS04G0047500/XS04G0054000/XS04G0054100/XS04G0054…	92
GO:0009894	regulation of catabolic process|BP	58/2857	236/17622	0.000574064	0.0665653	0.0634535	XS01G0186700/XS01G0198500/XS01G0364000/XS02G0004000/XS02G0016000/XS02G0023500/XS02G0055400/XS02G0069100/XS02G0112900/XS03G0011500/XS03G0030200/XS03G0031500/XS03G0053500/XS03G0057900/XS03G0081400/XS03G0092900/XS03G0247000/XS03G0286900/XS03G0329700/XS04G0104100/XS04G0229600/XS05G0040200/XS05G0140700/XS06G0162600/XS06G0236700/XS07G0002900/XS07G0003000/XS07G0034100/XS07G0061700/XS07G0240200/XS07G0241…	58
GO:0044419	interspecies interaction between organisms|BP	100/2857	453/17622	0.000591493	0.0665653	0.0634535	XS01G0003900/XS01G0032100/XS01G0127600/XS01G0163500/XS01G0186700/XS01G0300200/XS01G0349200/XS01G0361500/XS01G0372000/XS01G0378300/XS01G0383500/XS01G0389200/XS02G0018800/XS02G0041800/XS02G0117400/XS02G0279100/XS03G0007900/XS03G0008300/XS03G0030200/XS03G0031500/XS03G0157800/XS03G0202800/XS03G0250700/XS03G0260000/XS03G0264800/XS03G0333400/XS04G0077600/XS04G0176900/XS04G0192700/XS04G0198900/XS04G0199…	100
GO:0016859	cis-trans isomerase activity|MF	22/2857	67/17622	0.000602718	0.0665653	0.0634535	XS01G0006200/XS01G0299800/XS01G0301800/XS02G0022200/XS02G0149200/XS03G0260000/XS03G0292200/XS03G0335400/XS05G0046900/XS06G0198000/XS06G0198100/XS07G0134100/XS08G0011200/XS10G0212900/XS11G0224100/XS12G0035800/XS13G0010600/XS13G0067500/XS14G0143500/XS14G0176500/XS15G0124700/XSUnG0033200	22
GO:0004970	ionotropic glutamate receptor activity|MF	15/2857	39/17622	0.00069297	0.0665653	0.0634535	XS02G0001500/XS03G0236200/XS03G0236800/XS06G0058600/XS06G0058800/XS06G0059100/XS06G0059200/XS06G0070000/XS06G0070100/XS06G0070200/XS06G0147000/XS06G0147300/XS15G0098900/XS15G0099200/XS15G0120500	15
GO:0005230	extracellular ligand-gated ion channel activity|MF	15/2857	39/17622	0.00069297	0.0665653	0.0634535	XS02G0001500/XS03G0236200/XS03G0236800/XS06G0058600/XS06G0058800/XS06G0059100/XS06G0059200/XS06G0070000/XS06G0070100/XS06G0070200/XS06G0147000/XS06G0147300/XS15G0098900/XS15G0099200/XS15G0120500	15
GO:0008066	glutamate receptor activity|MF	15/2857	39/17622	0.00069297	0.0665653	0.0634535	XS02G0001500/XS03G0236200/XS03G0236800/XS06G0058600/XS06G0058800/XS06G0059100/XS06G0059200/XS06G0070000/XS06G0070100/XS06G0070200/XS06G0147000/XS06G0147300/XS15G0098900/XS15G0099200/XS15G0120500	15
GO:0022824	transmitter-gated ion channel activity|MF	15/2857	39/17622	0.00069297	0.0665653	0.0634535	XS02G0001500/XS03G0236200/XS03G0236800/XS06G0058600/XS06G0058800/XS06G0059100/XS06G0059200/XS06G0070000/XS06G0070100/XS06G0070200/XS06G0147000/XS06G0147300/XS15G0098900/XS15G0099200/XS15G0120500	15
GO:0022835	transmitter-gated channel activity|MF	15/2857	39/17622	0.00069297	0.0665653	0.0634535	XS02G0001500/XS03G0236200/XS03G0236800/XS06G0058600/XS06G0058800/XS06G0059100/XS06G0059200/XS06G0070000/XS06G0070100/XS06G0070200/XS06G0147000/XS06G0147300/XS15G0098900/XS15G0099200/XS15G0120500	15
GO:0030594	neurotransmitter receptor activity|MF	15/2857	39/17622	0.00069297	0.0665653	0.0634535	XS02G0001500/XS03G0236200/XS03G0236800/XS06G0058600/XS06G0058800/XS06G0059100/XS06G0059200/XS06G0070000/XS06G0070100/XS06G0070200/XS06G0147000/XS06G0147300/XS15G0098900/XS15G0099200/XS15G0120500	15
GO:0019684	photosynthesis, light reaction|BP	53/2857	213/17622	0.0007114	0.0665653	0.0634535	XS01G0080500/XS01G0141700/XS01G0170900/XS01G0207600/XS02G0080200/XS02G0217300/XS02G0222200/XS02G0289900/XS03G0031100/XS03G0321400/XS04G0112700/XS04G0167000/XS04G0171900/XS05G0045700/XS05G0066600/XS05G0066900/XS05G0246900/XS06G0022000/XS07G0005100/XS07G0069900/XS07G0246300/XS08G0080700/XS08G0256600/XS09G0063800/XS09G0178100/XS10G0160400/XS10G0204800/XS11G0025600/XS11G0158800/XS12G0222600/XS12G0239…	53
GO:0061640	cytoskeleton-dependent cytokinesis|BP	56/2857	228/17622	0.000717803	0.0665653	0.0634535	XS01G0005000/XS01G0106400/XS01G0263900/XS01G0300200/XS01G0364000/XS01G0364400/XS01G0371600/XS01G0375500/XS01G0376000/XS01G0401800/XS02G0055400/XS02G0078600/XS02G0112900/XS02G0123200/XS02G0135700/XS02G0288500/XS03G0174100/XS03G0223800/XS03G0259000/XS04G0134400/XS04G0285300/XS04G0289000/XS05G0000800/XS05G0032100/XS05G0148800/XS06G0013000/XS06G0063800/XS06G0182500/XS07G0092500/XS07G0092700/XS07G0115…	56
GO:0006506	GPI anchor biosynthetic process|BP	12/2857	28/17622	0.000760201	0.0670364	0.0639026	XS01G0046100/XS01G0194300/XS01G0234400/XS04G0157300/XS06G0246100/XS07G0008200/XS08G0243500/XS10G0011400/XS11G0157200/XS11G0157800/XS14G0027700/XSUnG0093300	12
GO:0019932	second-messenger-mediated signaling|BP	27/2857	90/17622	0.000771809	0.0670364	0.0639026	XS01G0272900/XS01G0373000/XS02G0001500/XS03G0236200/XS03G0236800/XS04G0104100/XS04G0165500/XS06G0013000/XS06G0058600/XS06G0058800/XS06G0059100/XS06G0059200/XS06G0070000/XS06G0070100/XS06G0147000/XS06G0147300/XS06G0154500/XS08G0196000/XS11G0205900/XS12G0091000/XS13G0068000/XS13G0132200/XS13G0156200/XS15G0098900/XS15G0099200/XS15G0120500/XS15G0132800	27
GO:0015979	photosynthesis|BP	78/2857	341/17622	0.000781894	0.0670364	0.0639026	XS01G0080500/XS01G0141700/XS01G0170900/XS01G0202800/XS01G0207600/XS02G0080200/XS02G0217300/XS02G0222200/XS02G0289900/XS03G0031100/XS03G0213800/XS03G0321400/XS04G0112700/XS04G0167000/XS04G0171900/XS04G0198500/XS05G0045700/XS05G0066600/XS05G0066900/XS05G0150700/XS05G0246900/XS05G0262900/XS06G0009000/XS06G0022000/XS06G0057900/XS06G0133800/XS07G0005100/XS07G0069900/XS07G0246300/XS08G0080700/XS08G0256…	78
GO:0009657	plastid organization|BP	76/2857	332/17622	0.000884985	0.0741595	0.0706927	XS01G0080500/XS01G0141700/XS01G0170900/XS01G0207600/XS01G0238600/XS01G0241100/XS01G0264000/XS01G0293200/XS01G0354500/XS01G0389200/XS01G0403900/XS02G0023500/XS02G0071500/XS02G0080200/XS03G0031100/XS03G0244100/XS03G0277200/XS03G0299800/XS04G0001900/XS04G0027400/XS04G0027500/XS04G0107900/XS04G0112700/XS04G0239200/XS04G0253500/XS05G0008000/XS05G0038100/XS05G0038200/XS05G0042600/XS05G0065700/XS05G0067…	76
GO:0071230	cellular response to amino acid stimulus|BP	14/2857	36/17622	0.000912656	0.0741595	0.0706927	XS02G0001500/XS03G0236200/XS03G0236800/XS06G0058600/XS06G0058800/XS06G0059100/XS06G0059200/XS06G0070000/XS06G0070100/XS06G0147000/XS06G0147300/XS15G0098900/XS15G0099200/XS15G0120500	14
GO:0070838	divalent metal ion transport|BP	49/2857	196/17622	0.000990227	0.0789402	0.07525	XS02G0001500/XS03G0228700/XS03G0236200/XS03G0236800/XS03G0251200/XS03G0331700/XS04G0007200/XS04G0065500/XS04G0104100/XS05G0256300/XS06G0009000/XS06G0058600/XS06G0058800/XS06G0059100/XS06G0059200/XS06G0070000/XS06G0070100/XS06G0147000/XS06G0147300/XS06G0154500/XS07G0078100/XS07G0213000/XS07G0253300/XS08G0010000/XS08G0112000/XS09G0001100/XS09G0178100/XS09G0184400/XS09G0184700/XS10G0052800/XS10G0053…	49
GO:0006974	cellular response to DNA damage stimulus|BP	106/2857	492/17622	0.00100979	0.0791117	0.0754134	XS01G0186700/XS01G0243500/XS01G0364000/XS01G0364400/XS01G0369000/XS01G0372000/XS01G0375500/XS01G0376000/XS01G0384400/XS02G0100300/XS02G0112900/XS02G0135700/XS02G0203600/XS02G0279100/XS03G0008300/XS03G0011500/XS03G0030200/XS03G0031500/XS03G0092900/XS03G0095100/XS03G0157800/XS03G0214400/XS03G0263100/XS03G0267100/XS03G0325800/XS04G0104100/XS04G0154600/XS04G0189000/XS04G0192700/XS04G0198400/XS04G0202…	106
GO:0031329	regulation of cellular catabolic process|BP	50/2857	202/17622	0.00111915	0.0847192	0.0807588	XS01G0198500/XS02G0004000/XS02G0023500/XS02G0055400/XS02G0069100/XS02G0112900/XS03G0011500/XS03G0030200/XS03G0031500/XS03G0053500/XS03G0081400/XS03G0092900/XS03G0247000/XS03G0286900/XS03G0329700/XS04G0104100/XS04G0229600/XS05G0040200/XS05G0140700/XS06G0162600/XS06G0236700/XS07G0002900/XS07G0003000/XS07G0034100/XS07G0061700/XS07G0240200/XS07G0241000/XS08G0038700/XS08G0104900/XS08G0112000/XS08G0168…	50
GO:0002682	regulation of immune system process|BP	92/2857	419/17622	0.00114224	0.0847192	0.0807588	XS01G0000800/XS01G0032100/XS01G0170200/XS01G0186700/XS01G0330300/XS02G0001500/XS02G0184000/XS02G0279100/XS03G0053800/XS03G0091100/XS03G0178900/XS03G0187700/XS03G0278100/XS03G0301400/XS03G0325800/XS04G0019300/XS04G0019500/XS04G0104100/XS04G0154600/XS04G0167000/XS04G0204500/XS04G0217600/XS04G0236600/XS04G0257200/XS05G0040200/XS06G0013800/XS06G0032500/XS06G0058600/XS06G0058800/XS06G0059100/XS06G0059…	92
GO:0007017	microtubule-based process|BP	76/2857	335/17622	0.00115594	0.0847192	0.0807588	XS01G0003900/XS01G0005000/XS01G0209100/XS01G0263900/XS01G0300200/XS01G0363400/XS01G0364000/XS01G0364400/XS01G0371600/XS01G0375500/XS01G0376000/XS02G0002500/XS02G0002700/XS02G0055400/XS02G0078600/XS02G0123200/XS02G0290000/XS03G0000700/XS03G0174100/XS04G0015700/XS04G0134400/XS04G0198900/XS04G0199100/XS04G0229600/XS04G0263100/XS04G0285300/XS05G0148800/XS05G0248700/XS05G0266700/XS05G0267200/XS06G0063…	76
GO:0043902	positive regulation of multi-organism process|BP	24/2857	79/17622	0.00121617	0.0859421	0.0819245	XS01G0383500/XS01G0405900/XS02G0055400/XS03G0030200/XS03G0031500/XS03G0157800/XS03G0202800/XS03G0250700/XS03G0260000/XS04G0198900/XS04G0199100/XS04G0227900/XS04G0256700/XS05G0105800/XS09G0022100/XS10G0020200/XS10G0041300/XS11G0118600/XS12G0037200/XS12G0087400/XS13G0026400/XS14G0176500/XSUnG0111300/XSUnG0174900	24
GO:0005262	calcium channel activity|MF	17/2857	49/17622	0.00122936	0.0859421	0.0819245	XS02G0001500/XS03G0236200/XS03G0236800/XS04G0104100/XS06G0058600/XS06G0058800/XS06G0059100/XS06G0059200/XS06G0070000/XS06G0070100/XS06G0147000/XS06G0147300/XS09G0001100/XS15G0098900/XS15G0099200/XS15G0120500/XS15G0132800	17
GO:0072511	divalent inorganic cation transport|BP	49/2857	198/17622	0.00125233	0.0862213	0.0821907	XS02G0001500/XS03G0228700/XS03G0236200/XS03G0236800/XS03G0251200/XS03G0331700/XS04G0007200/XS04G0065500/XS04G0104100/XS05G0256300/XS06G0009000/XS06G0058600/XS06G0058800/XS06G0059100/XS06G0059200/XS06G0070000/XS06G0070100/XS06G0147000/XS06G0147300/XS06G0154500/XS07G0078100/XS07G0213000/XS07G0253300/XS08G0010000/XS08G0112000/XS09G0001100/XS09G0178100/XS09G0184400/XS09G0184700/XS10G0052800/XS10G0053…	49
GO:0000281	mitotic cytokinesis|BP	53/2857	219/17622	0.0013992	0.0928767	0.0885349	XS01G0005000/XS01G0106400/XS01G0263900/XS01G0300200/XS01G0364400/XS01G0371600/XS01G0375500/XS01G0376000/XS01G0401800/XS02G0055400/XS02G0078600/XS02G0112900/XS02G0123200/XS02G0135700/XS02G0288500/XS03G0174100/XS03G0223800/XS03G0259000/XS04G0134400/XS04G0285300/XS04G0289000/XS05G0000800/XS05G0032100/XS05G0148800/XS06G0013000/XS06G0063800/XS06G0182500/XS07G0092500/XS07G0115800/XS07G0115900/XS08G0091…	53
GO:0016197	endosomal transport|BP	22/2857	71/17622	0.00143666	0.0928767	0.0885349	XS01G0003900/XS01G0232700/XS01G0302800/XS01G0381700/XS02G0112900/XS02G0200600/XS03G0223800/XS04G0198900/XS04G0199100/XS05G0076500/XS06G0084400/XS07G0019000/XS08G0123800/XS08G0245300/XS10G0004200/XS10G0049200/XS12G0235000/XS13G0252900/XS14G0175000/XS15G0017400/XS15G0154100/XSUnG0137600	22
GO:0006605	protein targeting|BP	95/2857	438/17622	0.00144013	0.0928767	0.0885349	XS01G0283200/XS01G0290200/XS01G0309700/XS01G0381700/XS02G0009500/XS02G0051500/XS02G0145400/XS03G0003600/XS03G0020000/XS03G0031100/XS03G0064800/XS03G0091100/XS03G0137600/XS03G0137700/XS03G0188000/XS03G0223800/XS03G0231400/XS03G0278100/XS03G0292200/XS04G0065500/XS04G0134400/XS04G0167000/XS04G0237600/XS04G0239200/XS04G0257200/XS05G0067500/XS05G0123200/XS05G0246900/XS05G0255900/XS06G0013800/XS06G0021…	95
GO:0009247	glycolipid biosynthetic process|BP	26/2857	89/17622	0.00147071	0.0928767	0.0885349	XS01G0000100/XS01G0046100/XS01G0194300/XS01G0234400/XS01G0399600/XS02G0125800/XS03G0188300/XS04G0157300/XS06G0013000/XS06G0176100/XS06G0246100/XS07G0008200/XS08G0243500/XS09G0022900/XS10G0011400/XS11G0157200/XS11G0157800/XS12G0061400/XS12G0238400/XS13G0032400/XS14G0027700/XS14G0104600/XS15G0026300/XS15G0096900/XSUnG0025800/XSUnG0093300	26
GO:1903047	mitotic cell cycle process|BP	99/2857	460/17622	0.00150547	0.0928767	0.0885349	XS01G0005000/XS01G0106400/XS01G0112600/XS01G0186700/XS01G0263900/XS01G0300200/XS01G0364400/XS01G0371600/XS01G0375500/XS01G0376000/XS01G0386600/XS01G0401800/XS02G0055400/XS02G0078600/XS02G0112900/XS02G0123200/XS02G0135700/XS02G0279100/XS02G0288500/XS03G0000700/XS03G0092900/XS03G0174100/XS03G0223800/XS03G0259000/XS03G0263900/XS03G0265200/XS03G0325800/XS04G0134400/XS04G0154600/XS04G0198900/XS04G0199…	99
GO:0015276	ligand-gated ion channel activity|MF	18/2857	54/17622	0.00151252	0.0928767	0.0885349	XS02G0001500/XS03G0236200/XS03G0236800/XS06G0058600/XS06G0058800/XS06G0059100/XS06G0059200/XS06G0070000/XS06G0070100/XS06G0070200/XS06G0147000/XS06G0147300/XS09G0001100/XS15G0098900/XS15G0099200/XS15G0120500/XS15G0132800/XS15G0180500	18
GO:0022834	ligand-gated channel activity|MF	18/2857	54/17622	0.00151252	0.0928767	0.0885349	XS02G0001500/XS03G0236200/XS03G0236800/XS06G0058600/XS06G0058800/XS06G0059100/XS06G0059200/XS06G0070000/XS06G0070100/XS06G0070200/XS06G0147000/XS06G0147300/XS09G0001100/XS15G0098900/XS15G0099200/XS15G0120500/XS15G0132800/XS15G0180500	18
GO:0046185	aldehyde catabolic process|BP	18/2857	54/17622	0.00151252	0.0928767	0.0885349	XS02G0082300/XS02G0203600/XS02G0252100/XS03G0022500/XS03G0091100/XS05G0107100/XS06G0120400/XS08G0019200/XS08G0087600/XS08G0138200/XS10G0027900/XS10G0138700/XS12G0060200/XS12G0071100/XS12G0135300/XS13G0264100/XS14G0006400/XS15G0008700	18
GO:0048524	positive regulation of viral process|BP	14/2857	38/17622	0.00168935	0.102352	0.0975674	XS01G0383500/XS03G0030200/XS03G0031500/XS03G0157800/XS03G0202800/XS03G0260000/XS04G0198900/XS04G0199100/XS04G0227900/XS05G0105800/XS10G0020200/XS12G0037200/XS14G0176500/XSUnG0174900	14
GO:0009250	glucan biosynthetic process|BP	62/2857	267/17622	0.00174563	0.10437	0.0994914	XS01G0221200/XS01G0230600/XS01G0241100/XS01G0288600/XS01G0358500/XS01G0363400/XS01G0364400/XS01G0369000/XS01G0398800/XS02G0290000/XS03G0053800/XS03G0130200/XS03G0244100/XS03G0259000/XS04G0063800/XS04G0167000/XS04G0264000/XS04G0289000/XS05G0038100/XS05G0038200/XS05G0040200/XS05G0246900/XS05G0248700/XS05G0266700/XS05G0267200/XS06G0005600/XS06G0131200/XS06G0263800/XS06G0263900/XS07G0008200/XS07G0008…	62
GO:0005509	calcium ion binding|MF	67/2857	293/17622	0.00177227	0.104587	0.0996975	XS01G0024400/XS01G0091100/XS01G0157000/XS01G0222000/XS01G0272900/XS01G0300900/XS01G0304400/XS01G0385600/XS01G0385900/XS01G0387400/XS02G0254900/XS02G0255100/XS02G0255200/XS02G0255500/XS03G0057400/XS03G0251200/XS03G0290100/XS03G0321400/XS04G0009000/XS04G0009600/XS04G0019300/XS04G0019500/XS04G0109300/XS04G0118700/XS04G0165300/XS04G0165500/XS05G0040200/XS06G0090800/XS06G0259800/XS07G0001000/XS07G0065…	67
GO:0008173	RNA methyltransferase activity|MF	17/2857	51/17622	0.00202379	0.114376	0.109029	XS01G0306800/XS03G0188000/XS03G0227700/XS03G0231400/XS04G0095700/XS04G0223500/XS04G0238700/XS04G0288600/XS06G0265700/XS09G0202700/XS12G0025800/XS12G0060200/XS13G0138600/XS13G0187700/XS14G0094600/XSUnG0106700/XSUnG0248700	17
GO:0000910	cytokinesis|BP	56/2857	238/17622	0.00207359	0.114376	0.109029	XS01G0005000/XS01G0106400/XS01G0263900/XS01G0300200/XS01G0364000/XS01G0364400/XS01G0371600/XS01G0375500/XS01G0376000/XS01G0401800/XS02G0055400/XS02G0078600/XS02G0112900/XS02G0123200/XS02G0135700/XS02G0288500/XS03G0174100/XS03G0223800/XS03G0259000/XS04G0134400/XS04G0285300/XS04G0289000/XS05G0000800/XS05G0032100/XS05G0148800/XS06G0013000/XS06G0063800/XS06G0182500/XS07G0092500/XS07G0092700/XS07G0115…	56
GO:0009438	methylglyoxal metabolic process|BP	16/2857	47/17622	0.00212216	0.114376	0.109029	XS02G0082300/XS02G0252100/XS03G0022500/XS03G0091100/XS05G0107100/XS06G0120400/XS08G0087600/XS08G0138200/XS10G0027900/XS10G0138700/XS12G0060200/XS12G0071100/XS12G0135300/XS13G0264100/XS14G0006400/XS15G0008700	16
GO:0051596	methylglyoxal catabolic process|BP	16/2857	47/17622	0.00212216	0.114376	0.109029	XS02G0082300/XS02G0252100/XS03G0022500/XS03G0091100/XS05G0107100/XS06G0120400/XS08G0087600/XS08G0138200/XS10G0027900/XS10G0138700/XS12G0060200/XS12G0071100/XS12G0135300/XS13G0264100/XS14G0006400/XS15G0008700	16
GO:0008380	RNA splicing|BP	82/2857	374/17622	0.00213951	0.114376	0.109029	XS01G0127600/XS01G0225900/XS01G0301800/XS01G0339000/XS01G0361500/XS01G0371900/XS01G0394200/XS02G0045900/XS02G0069100/XS02G0149200/XS03G0030200/XS03G0031500/XS03G0045800/XS03G0113900/XS03G0157800/XS03G0187700/XS03G0202800/XS03G0260000/XS03G0304600/XS03G0333400/XS04G0012700/XS04G0131900/XS04G0154200/XS04G0154600/XS04G0202900/XS04G0206100/XS04G0227900/XS04G0285300/XS05G0027400/XS05G0040200/XS05G0084…	82
GO:0046467	membrane lipid biosynthetic process|BP	30/2857	110/17622	0.00220818	0.116674	0.11122	XS01G0000100/XS01G0046100/XS01G0194300/XS01G0234400/XS01G0399600/XS02G0125800/XS03G0188300/XS04G0148900/XS04G0157300/XS05G0102000/XS06G0013000/XS06G0076500/XS06G0176100/XS06G0246100/XS07G0008200/XS08G0243500/XS09G0022900/XS10G0011400/XS11G0016200/XS11G0157200/XS11G0157800/XS12G0061400/XS12G0238400/XS13G0032400/XS14G0027700/XS14G0104600/XS15G0026300/XS15G0096900/XSUnG0025800/XSUnG0093300	30
GO:0006816	calcium ion transport|BP	31/2857	115/17622	0.00229814	0.11975	0.114152	XS02G0001500/XS03G0228700/XS03G0236200/XS03G0236800/XS03G0251200/XS04G0065500/XS04G0104100/XS05G0256300/XS06G0058600/XS06G0058800/XS06G0059100/XS06G0059200/XS06G0070000/XS06G0070100/XS06G0147000/XS06G0147300/XS06G0154500/XS07G0078100/XS07G0213000/XS08G0112000/XS09G0001100/XS10G0052800/XS10G0053700/XS12G0055200/XS14G0103100/XS15G0098900/XS15G0099200/XS15G0120500/XS15G0132800/XS15G0180500/XSUnG0219…	31
GO:0044451	nucleoplasm part|CC	85/2857	392/17622	0.00249919	0.127575	0.121611	XS01G0127600/XS01G0198500/XS01G0266100/XS01G0275100/XS01G0320300/XS01G0358200/XS01G0361500/XS01G0364000/XS01G0386600/XS01G0394200/XS01G0399700/XS01G0399900/XS02G0045900/XS02G0135700/XS03G0030200/XS03G0031500/XS03G0052700/XS03G0132800/XS03G0157800/XS03G0187700/XS03G0202800/XS03G0260000/XS03G0265200/XS03G0286900/XS03G0325800/XS03G0333400/XS04G0154600/XS04G0176900/XS04G0189000/XS04G0227900/XS04G0245…	85
GO:0043903	regulation of symbiosis, encompassing mutualism through parasitism|BP	20/2857	65/17622	0.00254167	0.127575	0.121611	XS01G0383500/XS03G0030200/XS03G0031500/XS03G0157800/XS03G0202800/XS03G0250700/XS03G0260000/XS04G0176900/XS04G0198900/XS04G0199100/XS04G0227900/XS05G0105800/XS06G0084400/XS06G0265200/XS10G0020200/XS11G0023100/XS12G0037200/XS14G0176500/XS15G0154100/XSUnG0174900	20
GO:0051052	regulation of DNA metabolic process|BP	55/2857	235/17622	0.00255639	0.127575	0.121611	XS01G0032100/XS01G0112600/XS01G0203900/XS01G0273800/XS01G0275800/XS01G0372000/XS01G0375500/XS01G0376000/XS01G0383500/XS01G0384400/XS01G0409300/XS02G0078600/XS02G0135700/XS03G0204900/XS03G0265200/XS03G0267100/XS03G0297400/XS03G0325800/XS04G0172100/XS04G0189000/XS04G0198400/XS04G0229600/XS04G0236600/XS04G0263100/XS05G0148800/XS06G0059500/XS06G0182500/XS06G0247800/XS06G0259700/XS07G0092500/XS08G0100…	55
GO:0042023	DNA endoreduplication|BP	22/2857	74/17622	0.00258294	0.127575	0.121611	XS01G0203900/XS01G0375500/XS01G0376000/XS02G0078600/XS03G0263900/XS03G0265200/XS03G0297400/XS04G0172100/XS04G0232600/XS05G0127800/XS06G0125200/XS07G0092500/XS10G0030400/XS10G0178300/XS11G0118600/XS12G0024100/XS12G0250400/XS13G0077900/XS15G0000800/XS15G0102400/XS15G0173200/XSUnG0067100	22
GO:0006275	regulation of DNA replication|BP	32/2857	121/17622	0.00274131	0.129382	0.123333	XS01G0032100/XS01G0112600/XS01G0203900/XS01G0372000/XS01G0375500/XS01G0376000/XS02G0078600/XS03G0265200/XS03G0297400/XS03G0325800/XS04G0172100/XS04G0236600/XS04G0263100/XS05G0148800/XS06G0059500/XS06G0182500/XS06G0259700/XS07G0092500/XS08G0124900/XS08G0125200/XS09G0201200/XS10G0013600/XS10G0060400/XS10G0197800/XS13G0069800/XS15G0023600/XS15G0102400/XS15G0112300/XS15G0171700/XS15G0173200/XSUnG0067…	32
GO:0019252	starch biosynthetic process|BP	32/2857	121/17622	0.00274131	0.129382	0.123333	XS01G0230600/XS01G0241100/XS01G0358500/XS01G0369000/XS03G0130200/XS03G0244100/XS04G0264000/XS05G0038100/XS05G0038200/XS05G0246900/XS05G0248700/XS05G0266700/XS05G0267200/XS06G0005600/XS07G0008300/XS07G0116700/XS07G0246300/XS09G0178100/XS10G0052600/XS10G0160400/XS11G0177200/XS12G0142100/XS12G0222600/XS12G0238400/XS13G0051100/XS13G0106100/XS13G0108100/XS13G0242200/XS14G0011500/XS15G0026300/XS15G0053…	32
GO:0031365	N-terminal protein amino acid modification|BP	19/2857	61/17622	0.00275903	0.129382	0.123333	XS01G0238600/XS01G0297900/XS02G0019400/XS02G0145400/XS04G0202800/XS04G0227900/XS05G0110600/XS05G0141800/XS05G0164700/XS06G0259800/XS08G0188100/XS08G0188400/XS09G0126300/XS09G0126400/XS09G0162400/XS10G0203400/XS13G0139200/XS14G0033600/XSUnG0143600	19
GO:0061136	regulation of proteasomal protein catabolic process|BP	19/2857	61/17622	0.00275903	0.129382	0.123333	XS02G0004000/XS02G0055400/XS03G0092900/XS03G0286900/XS03G0329700/XS04G0104100/XS04G0229600/XS05G0140700/XS07G0003000/XS07G0034100/XS07G0061700/XS08G0112000/XS08G0244400/XS09G0238400/XS10G0213700/XS11G0000300/XS12G0136900/XS13G0147100/XS14G0004000	19
GO:0002218	activation of innate immune response|BP	42/2857	170/17622	0.00276189	0.129382	0.123333	XS01G0170200/XS01G0186700/XS01G0330300/XS02G0001500/XS02G0184000/XS02G0279100/XS03G0053800/XS03G0178900/XS03G0301400/XS04G0019300/XS04G0019500/XS04G0154600/XS06G0058600/XS06G0058800/XS06G0059100/XS06G0059200/XS06G0070000/XS06G0070100/XS06G0154500/XS06G0244600/XS07G0034100/XS07G0061700/XS07G0218600/XS08G0112000/XS09G0003400/XS09G0241800/XS09G0242300/XS10G0022600/XS10G0145700/XS12G0035700/XS12G0254…	42
GO:0004222	metalloendopeptidase activity|MF	18/2857	57/17622	0.00298277	0.136241	0.129872	XS01G0024400/XS01G0230000/XS01G0322800/XS03G0278500/XS04G0112700/XS05G0107100/XS07G0116700/XS08G0074400/XS08G0074500/XS08G0235500/XS09G0022100/XS11G0073500/XS11G0073700/XS12G0045600/XS12G0239200/XS12G0256400/XS13G0057700/XS14G0017900	18
GO:1904062	regulation of cation transmembrane transport|BP	18/2857	57/17622	0.00298277	0.136241	0.129872	XS01G0239800/XS02G0080200/XS03G0003600/XS03G0107900/XS03G0125500/XS03G0126500/XS03G0309500/XS06G0154500/XS07G0005100/XS08G0006000/XS08G0080700/XS08G0112000/XS08G0140400/XS08G0140600/XS10G0050600/XS10G0160400/XS10G0182300/XS12G0253000	18
GO:0006505	GPI anchor metabolic process|BP	12/2857	32/17622	0.00300131	0.136241	0.129872	XS01G0046100/XS01G0194300/XS01G0234400/XS04G0157300/XS06G0246100/XS07G0008200/XS08G0243500/XS10G0011400/XS11G0157200/XS11G0157800/XS14G0027700/XSUnG0093300	12
GO:0042176	regulation of protein catabolic process|BP	27/2857	98/17622	0.00305823	0.136241	0.129872	XS01G0186700/XS01G0364000/XS02G0004000/XS02G0016000/XS02G0055400/XS03G0057900/XS03G0092900/XS03G0286900/XS03G0329700/XS04G0104100/XS04G0229600/XS05G0140700/XS07G0003000/XS07G0034100/XS07G0061700/XS08G0112000/XS08G0244400/XS09G0022100/XS09G0238400/XS10G0213700/XS11G0000300/XS12G0136900/XS13G0147100/XS14G0004000/XS15G0154100/XSUnG0155900/XSUnG0195100	27
GO:1903311	regulation of mRNA metabolic process|BP	27/2857	98/17622	0.00305823	0.136241	0.129872	XS01G0198500/XS02G0023500/XS02G0045900/XS03G0030200/XS03G0031500/XS03G0202800/XS03G0247000/XS04G0154200/XS04G0227900/XS05G0040200/XS05G0243100/XS07G0002900/XS07G0143000/XS07G0240200/XS10G0063200/XS10G0092300/XS12G0035600/XS12G0037200/XS12G0155400/XS12G0192600/XS13G0138600/XS13G0146900/XS14G0044800/XS14G0048000/XS15G0169600/XSUnG0011100/XSUnG0107000	27
GO:0009767	photosynthetic electron transport chain|BP	22/2857	75/17622	0.00310563	0.137009	0.130605	XS02G0080200/XS02G0217300/XS02G0222200/XS02G0289900/XS04G0171900/XS07G0005100/XS07G0246300/XS09G0063800/XS09G0178100/XS10G0204800/XS11G0025600/XS11G0158800/XS12G0239200/XS13G0219300/XS13G0259700/XS13G0260000/XS15G0143600/XSPtG0004800/XSPtG0004900/XSPtG0006200/XSPtG0009400/XSUnG0121100	22
GO:0051726	regulation of cell cycle|BP	87/2857	406/17622	0.00318049	0.138854	0.132363	XS01G0008800/XS01G0112600/XS01G0127600/XS01G0186700/XS01G0203900/XS01G0239800/XS01G0372000/XS01G0375500/XS01G0376000/XS01G0386600/XS02G0055400/XS02G0065500/XS02G0078600/XS02G0135700/XS02G0279100/XS03G0023000/XS03G0107900/XS03G0187700/XS03G0263900/XS03G0265200/XS03G0267100/XS03G0297400/XS03G0325800/XS04G0154600/XS04G0172100/XS04G0198900/XS04G0199100/XS04G0219600/XS04G0232600/XS04G0263100/XS05G0000…	87
GO:0043200	response to amino acid|BP	17/2857	53/17622	0.00320855	0.138854	0.132363	XS01G0287700/XS02G0001500/XS03G0022500/XS03G0236200/XS03G0236800/XS06G0058600/XS06G0058800/XS06G0059100/XS06G0059200/XS06G0070000/XS06G0070100/XS06G0147000/XS06G0147300/XS07G0162900/XS15G0098900/XS15G0099200/XS15G0120500	17
GO:0072657	protein localization to membrane|BP	50/2857	212/17622	0.00330149	0.141528	0.134912	XS01G0305500/XS01G0309700/XS01G0409700/XS02G0051500/XS02G0145400/XS02G0217200/XS02G0222100/XS03G0003600/XS03G0091100/XS03G0278100/XS04G0134400/XS04G0167000/XS04G0257200/XS05G0192600/XS05G0246900/XS05G0255900/XS06G0013800/XS06G0032500/XS06G0123500/XS07G0006900/XS07G0036100/XS07G0192200/XS07G0213000/XS07G0246300/XS08G0024400/XS08G0025100/XS08G0087600/XS08G0091000/XS08G0114800/XS10G0116000/XS10G0160…	50
GO:0006650	glycerophospholipid metabolic process|BP	48/2857	202/17622	0.00336523	0.142912	0.136232	XS01G0046100/XS01G0110400/XS01G0194300/XS01G0234400/XS01G0295000/XS01G0369000/XS01G0390500/XS02G0112900/XS03G0152500/XS03G0244100/XS04G0047500/XS04G0157300/XS04G0192000/XS05G0038100/XS05G0038200/XS05G0144900/XS06G0126000/XS06G0246100/XS07G0008200/XS08G0075500/XS08G0109000/XS08G0139800/XS08G0140400/XS08G0140600/XS08G0243500/XS09G0210600/XS10G0011400/XS10G0160400/XS10G0178100/XS10G0178300/XS11G0155…	48
GO:0006089	lactate metabolic process|BP	16/2857	49/17622	0.00343004	0.143763	0.137042	XS02G0082300/XS02G0252100/XS03G0022500/XS03G0091100/XS05G0107100/XS06G0120400/XS08G0087600/XS08G0138200/XS08G0140700/XS10G0027900/XS10G0138700/XS12G0060200/XS12G0071100/XS13G0264100/XS14G0006400/XS15G0008700	16
GO:0071395	cellular response to jasmonic acid stimulus|BP	44/2857	182/17622	0.00345292	0.143763	0.137042	XS01G0159400/XS01G0170200/XS01G0282300/XS01G0330300/XS02G0001500/XS03G0057300/XS03G0099700/XS03G0177700/XS03G0254200/XS03G0308200/XS04G0060500/XS04G0154800/XS04G0167000/XS04G0204500/XS05G0042400/XS06G0013800/XS06G0032500/XS06G0058600/XS06G0058800/XS06G0059100/XS06G0059200/XS06G0070000/XS06G0070100/XS06G0088100/XS07G0036100/XS07G0078100/XS07G0246300/XS08G0024400/XS09G0098300/XS09G0098500/XS10G0116…	44
GO:0050776	regulation of immune response|BP	83/2857	386/17622	0.00353512	0.144717	0.137952	XS01G0000800/XS01G0032100/XS01G0170200/XS01G0186700/XS01G0330300/XS02G0001500/XS02G0184000/XS02G0279100/XS03G0053800/XS03G0091100/XS03G0178900/XS03G0278100/XS03G0301400/XS04G0019300/XS04G0019500/XS04G0104100/XS04G0154600/XS04G0167000/XS04G0204500/XS04G0217600/XS04G0236600/XS04G0257200/XS06G0013800/XS06G0032500/XS06G0058600/XS06G0058800/XS06G0059100/XS06G0059200/XS06G0059500/XS06G0070000/XS06G0070…	83
GO:0019243	methylglyoxal catabolic process to D-lactate via S-lactoyl-glutathione|BP	15/2857	45/17622	0.00363818	0.1463	0.139461	XS02G0082300/XS02G0252100/XS03G0022500/XS03G0091100/XS05G0107100/XS06G0120400/XS08G0087600/XS08G0138200/XS10G0027900/XS10G0138700/XS12G0060200/XS12G0071100/XS13G0264100/XS14G0006400/XS15G0008700	15
GO:0061727	methylglyoxal catabolic process to lactate|BP	15/2857	45/17622	0.00363818	0.1463	0.139461	XS02G0082300/XS02G0252100/XS03G0022500/XS03G0091100/XS05G0107100/XS06G0120400/XS08G0087600/XS08G0138200/XS10G0027900/XS10G0138700/XS12G0060200/XS12G0071100/XS13G0264100/XS14G0006400/XS15G0008700	15
GO:0000226	microtubule cytoskeleton organization|BP	61/2857	270/17622	0.00368653	0.146944	0.140075	XS01G0005000/XS01G0209100/XS01G0263900/XS01G0300200/XS01G0363400/XS01G0364000/XS01G0364400/XS01G0371600/XS01G0375500/XS01G0376000/XS02G0055400/XS02G0078600/XS02G0123200/XS02G0290000/XS03G0000700/XS03G0174100/XS04G0015700/XS04G0134400/XS04G0198900/XS04G0199100/XS04G0229600/XS04G0285300/XS05G0148800/XS05G0248700/XS05G0266700/XS05G0267200/XS06G0063800/XS06G0064300/XS06G0082600/XS06G0097000/XS06G0182…	61
GO:0030855	epithelial cell differentiation|BP	20/2857	67/17622	0.00375897	0.148528	0.141585	XS03G0043600/XS04G0172100/XS05G0148800/XS06G0084400/XS06G0154500/XS06G0177800/XS06G0265200/XS10G0158600/XS11G0215800/XS12G0015700/XS12G0031100/XS12G0040700/XS13G0000300/XS13G0069800/XS13G0138600/XS14G0048000/XS15G0000800/XS15G0005800/XS15G0173200/XSUnG0196800	20
GO:1905368	peptidase complex|CC	23/2857	81/17622	0.00398308	0.151801	0.144705	XS01G0127600/XS01G0186700/XS01G0275100/XS02G0016000/XS02G0279100/XS03G0057900/XS03G0286900/XS03G0329700/XS05G0118000/XS06G0125200/XS07G0034100/XS07G0061700/XS08G0112000/XS09G0123600/XS09G0238400/XS10G0112300/XS10G0155500/XS11G0073500/XS12G0045600/XS12G0218300/XS13G0077900/XS13G0191300/XSUnG0145200	23
GO:0004871	NA	17/2857	54/17622	0.00398781	0.151801	0.144705	XS01G0256000/XS01G0273300/XS01G0279800/XS01G0373000/XS02G0054800/XS03G0217000/XS03G0277300/XS03G0299800/XS03G0309500/XS08G0006000/XS08G0196000/XS10G0112300/XS10G0137700/XS10G0182300/XS13G0099400/XS15G0172800/XSUnG0070100	17
GO:0009864	induced systemic resistance, jasmonic acid mediated signaling pathway|BP	12/2857	33/17622	0.00403044	0.151801	0.144705	XS01G0170200/XS01G0330300/XS02G0001500/XS06G0058600/XS06G0058800/XS06G0059100/XS06G0059200/XS06G0070000/XS06G0070100/XS12G0254900/XS14G0087000/XS15G0098900	12
GO:0000375	RNA splicing, via transesterification reactions|BP	56/2857	245/17622	0.00404224	0.151801	0.144705	XS01G0371900/XS02G0045900/XS03G0030200/XS03G0031500/XS03G0045800/XS03G0113900/XS03G0157800/XS03G0187700/XS03G0260000/XS04G0131900/XS04G0154200/XS04G0154600/XS04G0206100/XS04G0227900/XS04G0285300/XS05G0027400/XS05G0040200/XS05G0084000/XS05G0084400/XS05G0243100/XS07G0143000/XS07G0243300/XS08G0024400/XS08G0060600/XS08G0135200/XS09G0176300/XS09G0236600/XS10G0004000/XS10G0020200/XS10G0063200/XS10G0070…	56
GO:0031349	positive regulation of defense response|BP	53/2857	230/17622	0.00424799	0.15822	0.150824	XS01G0170200/XS01G0186700/XS01G0330300/XS01G0405900/XS02G0001500/XS02G0184000/XS02G0279100/XS03G0053800/XS03G0178900/XS03G0301400/XS04G0019300/XS04G0019500/XS04G0154600/XS04G0256700/XS06G0058600/XS06G0058800/XS06G0059100/XS06G0059200/XS06G0070000/XS06G0070100/XS06G0154500/XS06G0244600/XS07G0006900/XS07G0034100/XS07G0061700/XS07G0218600/XS08G0112000/XS09G0003400/XS09G0241800/XS09G0242300/XS10G0022…	53
GO:0070646	protein modification by small protein removal|BP	28/2857	105/17622	0.00429443	0.15865	0.151233	XS01G0275100/XS01G0288600/XS01G0308800/XS01G0381700/XS02G0055400/XS02G0135700/XS03G0090100/XS03G0173000/XS03G0286900/XS05G0079300/XS05G0140700/XS06G0059500/XS06G0131200/XS06G0265500/XS07G0045500/XS07G0061700/XS07G0062000/XS08G0244400/XS08G0250300/XS09G0105800/XS09G0162400/XS10G0213700/XS11G0000300/XS11G0014200/XS11G0220500/XS12G0136900/XS13G0063200/XS14G0004000	28
GO:0000775	chromosome, centromeric region|CC	20/2857	68/17622	0.00452926	0.165975	0.158216	XS01G0129800/XS01G0183100/XS01G0275100/XS02G0055400/XS02G0205300/XS02G0206700/XS04G0104100/XS04G0151400/XS04G0229600/XS05G0119900/XS09G0183800/XS10G0091700/XS10G0194800/XS11G0004000/XS11G0004200/XS12G0040700/XS13G0013500/XS13G0018800/XS15G0023600/XSUnG0195100	20
GO:0002253	activation of immune response|BP	44/2857	185/17622	0.004754	0.172817	0.164739	XS01G0170200/XS01G0186700/XS01G0330300/XS02G0001500/XS02G0184000/XS02G0279100/XS03G0053800/XS03G0178900/XS03G0301400/XS04G0019300/XS04G0019500/XS04G0104100/XS04G0154600/XS06G0058600/XS06G0058800/XS06G0059100/XS06G0059200/XS06G0070000/XS06G0070100/XS06G0154500/XS06G0244600/XS07G0034100/XS07G0061700/XS07G0218600/XS08G0112000/XS09G0003400/XS09G0241800/XS09G0242300/XS10G0022600/XS10G0145700/XS12G0035…	44
GO:0006261	DNA-dependent DNA replication|BP	53/2857	232/17622	0.00511194	0.184354	0.175736	XS01G0203900/XS01G0372000/XS01G0375500/XS01G0376000/XS01G0384400/XS02G0078600/XS02G0100300/XS03G0242800/XS03G0263900/XS03G0265200/XS03G0267100/XS03G0297400/XS03G0325800/XS04G0029800/XS04G0172100/XS04G0232600/XS04G0263100/XS05G0007800/XS05G0127800/XS05G0148800/XS06G0038000/XS06G0059500/XS06G0125200/XS06G0182500/XS06G0259700/XS07G0092500/XS07G0183300/XS07G0261300/XS08G0085700/XS08G0125200/XS08G0150…	53
GO:0044433	cytoplasmic vesicle part|CC	76/2857	354/17622	0.0052888	0.185406	0.176739	XS01G0065400/XS01G0163500/XS01G0277500/XS01G0308600/XS01G0336700/XS01G0364000/XS01G0381700/XS01G0409700/XS02G0018800/XS02G0217200/XS02G0222100/XS03G0000700/XS03G0223800/XS03G0232700/XS03G0239200/XS03G0274700/XS04G0045800/XS04G0046000/XS04G0070700/XS04G0163500/XS04G0172100/XS04G0198900/XS04G0199100/XS04G0239200/XS05G0076500/XS05G0143400/XS05G0192600/XS06G0034300/XS06G0036200/XS06G0039600/XS06G0077…	76
GO:0009867	jasmonic acid mediated signaling pathway|BP	43/2857	181/17622	0.0053213	0.185406	0.176739	XS01G0159400/XS01G0170200/XS01G0282300/XS01G0330300/XS02G0001500/XS03G0099700/XS03G0177700/XS03G0254200/XS03G0308200/XS04G0060500/XS04G0154800/XS04G0167000/XS04G0204500/XS05G0042400/XS06G0013800/XS06G0032500/XS06G0058600/XS06G0058800/XS06G0059100/XS06G0059200/XS06G0070000/XS06G0070100/XS06G0088100/XS07G0036100/XS07G0078100/XS07G0246300/XS08G0024400/XS09G0098300/XS09G0098500/XS10G0116000/XS10G0160…	43
GO:0016572	histone phosphorylation|BP	12/2857	34/17622	0.00532444	0.185406	0.176739	XS01G0263900/XS02G0055400/XS05G0148800/XS06G0059500/XS06G0236700/XS07G0092500/XS08G0205400/XS10G0013600/XS13G0018800/XS13G0056800/XS15G0023600/XSUnG0021000	12
GO:0008237	metallopeptidase activity|MF	26/2857	97/17622	0.0053779	0.185406	0.176739	XS01G0024400/XS01G0230000/XS01G0297900/XS01G0322800/XS02G0003400/XS03G0278500/XS04G0112700/XS05G0107100/XS07G0061700/XS07G0116700/XS08G0074400/XS08G0074500/XS08G0188100/XS08G0188400/XS08G0235500/XS09G0022100/XS09G0211700/XS11G0014200/XS11G0073500/XS11G0073700/XS12G0045600/XS12G0239200/XS12G0256400/XS13G0057700/XS14G0010700/XS14G0017900	26
GO:0098662	inorganic cation transmembrane transport|BP	63/2857	285/17622	0.00538593	0.185406	0.176739	XS01G0004600/XS01G0239800/XS02G0001500/XS02G0080200/XS03G0003600/XS03G0107900/XS03G0125500/XS03G0126500/XS03G0228700/XS03G0236200/XS03G0236800/XS03G0251200/XS03G0309500/XS04G0065500/XS04G0104100/XS04G0165100/XS06G0008100/XS06G0013000/XS06G0058600/XS06G0058800/XS06G0059100/XS06G0059200/XS06G0070000/XS06G0070100/XS06G0147000/XS06G0147300/XS06G0154500/XS06G0174700/XS07G0005100/XS07G0027600/XS07G0052…	63
GO:0019288	isopentenyl diphosphate biosynthetic process, methylerythritol 4-phosphate pathway|BP	36/2857	146/17622	0.00547824	0.187166	0.178417	XS01G0080500/XS01G0141700/XS01G0207600/XS01G0231800/XS01G0238600/XS01G0323000/XS01G0369000/XS02G0023500/XS02G0080200/XS03G0031100/XS03G0095200/XS03G0095300/XS03G0212000/XS03G0244100/XS04G0167000/XS04G0274600/XS05G0007900/XS05G0038100/XS05G0038200/XS05G0045700/XS07G0005100/XS07G0246300/XS07G0262800/XS09G0178100/XS10G0027900/XS10G0160400/XS12G0087800/XS12G0109000/XS13G0010600/XS13G0015700/XS13G0035…	36
GO:0045088	regulation of innate immune response|BP	76/2857	355/17622	0.00568535	0.188914	0.180082	XS01G0000800/XS01G0170200/XS01G0186700/XS01G0330300/XS02G0001500/XS02G0184000/XS02G0279100/XS03G0053800/XS03G0091100/XS03G0178900/XS03G0278100/XS03G0301400/XS04G0019300/XS04G0019500/XS04G0154600/XS04G0167000/XS04G0204500/XS04G0217600/XS04G0257200/XS06G0013800/XS06G0032500/XS06G0058600/XS06G0058800/XS06G0059100/XS06G0059200/XS06G0059500/XS06G0070000/XS06G0070100/XS06G0154500/XS06G0244600/XS07G0006…	76
GO:0090150	establishment of protein localization to membrane|BP	46/2857	197/17622	0.00569568	0.188914	0.180082	XS01G0305500/XS01G0309700/XS02G0051500/XS02G0145400/XS03G0003600/XS03G0091100/XS03G0278100/XS04G0134400/XS04G0167000/XS04G0257200/XS05G0246900/XS05G0255900/XS06G0013800/XS06G0032500/XS06G0123500/XS07G0006900/XS07G0036100/XS07G0192200/XS07G0213000/XS07G0246300/XS08G0024400/XS08G0025100/XS08G0087600/XS08G0091000/XS08G0114800/XS10G0116000/XS10G0160400/XS10G0215300/XS11G0159900/XS12G0019400/XS12G0024…	46
GO:0042182	ketone catabolic process|BP	19/2857	65/17622	0.00600035	0.196463	0.187279	XS02G0082300/XS02G0252100/XS03G0022500/XS03G0091100/XS03G0297500/XS05G0024400/XS05G0107100/XS06G0120400/XS08G0087600/XS08G0138200/XS10G0027900/XS10G0138700/XS12G0060200/XS12G0071100/XS12G0135300/XS13G0264100/XS14G0006400/XS15G0008700/XS15G0073700	19
GO:0050792	regulation of viral process|BP	17/2857	56/17622	0.00601373	0.196463	0.187279	XS01G0383500/XS03G0030200/XS03G0031500/XS03G0157800/XS03G0202800/XS03G0260000/XS04G0176900/XS04G0198900/XS04G0199100/XS04G0227900/XS05G0105800/XS06G0265200/XS10G0020200/XS12G0037200/XS14G0176500/XS15G0154100/XSUnG0174900	17
GO:0016604	nuclear body|CC	40/2857	167/17622	0.00605395	0.196463	0.187279	XS01G0198500/XS01G0358200/XS01G0364000/XS01G0386600/XS01G0394200/XS02G0045900/XS02G0135700/XS03G0187700/XS03G0260000/XS03G0265200/XS03G0325800/XS03G0333400/XS04G0154600/XS04G0176900/XS04G0227900/XS05G0040200/XS05G0079300/XS07G0143000/XS07G0243300/XS10G0004000/XS10G0063200/XS10G0154500/XS10G0210800/XS10G0213700/XS11G0045100/XS11G0080000/XS11G0150800/XS11G0220500/XS12G0035700/XS12G0136900/XS13G0069…	40
GO:0009240	isopentenyl diphosphate biosynthetic process|BP	37/2857	152/17622	0.00613947	0.196463	0.187279	XS01G0080500/XS01G0141700/XS01G0207600/XS01G0231800/XS01G0238600/XS01G0323000/XS01G0369000/XS02G0023500/XS02G0080200/XS03G0031100/XS03G0095200/XS03G0095300/XS03G0212000/XS03G0244100/XS04G0167000/XS04G0274600/XS05G0007900/XS05G0038100/XS05G0038200/XS05G0045700/XS05G0266100/XS07G0005100/XS07G0246300/XS07G0262800/XS09G0178100/XS10G0027900/XS10G0160400/XS12G0087800/XS12G0109000/XS13G0010600/XS13G0015…	37
GO:0046490	isopentenyl diphosphate metabolic process|BP	37/2857	152/17622	0.00613947	0.196463	0.187279	XS01G0080500/XS01G0141700/XS01G0207600/XS01G0231800/XS01G0238600/XS01G0323000/XS01G0369000/XS02G0023500/XS02G0080200/XS03G0031100/XS03G0095200/XS03G0095300/XS03G0212000/XS03G0244100/XS04G0167000/XS04G0274600/XS05G0007900/XS05G0038100/XS05G0038200/XS05G0045700/XS05G0266100/XS07G0005100/XS07G0246300/XS07G0262800/XS09G0178100/XS10G0027900/XS10G0160400/XS12G0087800/XS12G0109000/XS13G0010600/XS13G0015…	37
GO:0006281	DNA repair|BP	87/2857	416/17622	0.00630819	0.198732	0.189442	XS01G0243500/XS01G0364400/XS01G0369000/XS01G0372000/XS01G0375500/XS01G0376000/XS02G0100300/XS02G0112900/XS02G0135700/XS03G0008300/XS03G0011500/XS03G0030200/XS03G0031500/XS03G0092900/XS03G0095100/XS03G0157800/XS03G0214400/XS03G0267100/XS03G0325800/XS04G0154600/XS04G0189000/XS04G0192700/XS04G0198400/XS04G0202900/XS04G0229600/XS04G0256700/XS04G0275900/XS05G0007800/XS05G0105800/XS05G0147000/XS05G0198…	87
GO:0010243	response to organonitrogen compound|BP	99/2857	482/17622	0.00646906	0.198732	0.189442	XS01G0002700/XS01G0281800/XS01G0282300/XS01G0287700/XS01G0367200/XS01G0387400/XS02G0001500/XS02G0004000/XS02G0072400/XS02G0117400/XS02G0117700/XS02G0118300/XS03G0022500/XS03G0099700/XS03G0100100/XS03G0232400/XS03G0236200/XS03G0236800/XS03G0245500/XS03G0263100/XS03G0278100/XS03G0325800/XS03G0329700/XS03G0330300/XS04G0167000/XS04G0204500/XS04G0205900/XS04G0240000/XS05G0042400/XS05G0062600/XS05G0202…	99
GO:0030117	membrane coat|CC	16/2857	52/17622	0.00657277	0.198732	0.189442	XS01G0409700/XS03G0232700/XS04G0172100/XS04G0198900/XS04G0199100/XS05G0076500/XS06G0077600/XS08G0155500/XS08G0183600/XS09G0155400/XS10G0183000/XS11G0136000/XS11G0195500/XS13G0159700/XS14G0113600/XS15G0173200	16
GO:0048475	coated membrane|CC	16/2857	52/17622	0.00657277	0.198732	0.189442	XS01G0409700/XS03G0232700/XS04G0172100/XS04G0198900/XS04G0199100/XS05G0076500/XS06G0077600/XS08G0155500/XS08G0183600/XS09G0155400/XS10G0183000/XS11G0136000/XS11G0195500/XS13G0159700/XS14G0113600/XS15G0173200	16
GO:0045786	negative regulation of cell cycle|BP	39/2857	163/17622	0.00678338	0.198732	0.189442	XS01G0127600/XS01G0186700/XS01G0375500/XS01G0376000/XS01G0386600/XS02G0065500/XS02G0279100/XS03G0023000/XS03G0187700/XS03G0265200/XS03G0297400/XS03G0325800/XS04G0154600/XS04G0172100/XS04G0198900/XS04G0199100/XS04G0219600/XS04G0232600/XS05G0148800/XS05G0243100/XS07G0034100/XS07G0061700/XS08G0080600/XS08G0100500/XS08G0104900/XS08G0124900/XS08G0140600/XS09G0072700/XS09G0106200/XS10G0178300/XS13G0077…	39
GO:0006643	membrane lipid metabolic process|BP	35/2857	143/17622	0.0068977	0.198732	0.189442	XS01G0000100/XS01G0046100/XS01G0194300/XS01G0234400/XS01G0399600/XS02G0125800/XS03G0188300/XS04G0148900/XS04G0157300/XS04G0258700/XS05G0102000/XS06G0013000/XS06G0076500/XS06G0176100/XS06G0246100/XS07G0008200/XS08G0243500/XS09G0022900/XS09G0210600/XS10G0011400/XS11G0016200/XS11G0157200/XS11G0157800/XS12G0061400/XS12G0238400/XS13G0032400/XS14G0027700/XS14G0036800/XS14G0065900/XS14G0104600/XS15G0026…	35
GO:0006498	N-terminal protein lipidation|BP	12/2857	35/17622	0.0069279	0.198732	0.189442	XS02G0019400/XS02G0145400/XS04G0202800/XS04G0227900/XS05G0110600/XS05G0164700/XS06G0259800/XS09G0162400/XS10G0203400/XS13G0139200/XS14G0033600/XSUnG0143600	12
GO:0006499	N-terminal protein myristoylation|BP	12/2857	35/17622	0.0069279	0.198732	0.189442	XS02G0019400/XS02G0145400/XS04G0202800/XS04G0227900/XS05G0110600/XS05G0164700/XS06G0259800/XS09G0162400/XS10G0203400/XS13G0139200/XS14G0033600/XSUnG0143600	12
GO:0018377	protein myristoylation|BP	12/2857	35/17622	0.0069279	0.198732	0.189442	XS02G0019400/XS02G0145400/XS04G0202800/XS04G0227900/XS05G0110600/XS05G0164700/XS06G0259800/XS09G0162400/XS10G0203400/XS13G0139200/XS14G0033600/XSUnG0143600	12
GO:0030120	vesicle coat|CC	12/2857	35/17622	0.0069279	0.198732	0.189442	XS01G0409700/XS03G0232700/XS04G0172100/XS05G0076500/XS06G0077600/XS08G0183600/XS10G0183000/XS11G0136000/XS11G0195500/XS13G0159700/XS14G0113600/XS15G0173200	12
GO:0045995	regulation of embryonic development|BP	12/2857	35/17622	0.0069279	0.198732	0.189442	XS01G0381700/XS02G0060600/XS02G0112900/XS03G0263100/XS04G0172100/XS04G0240000/XS05G0000800/XS07G0093400/XS08G0242100/XS09G0227900/XS12G0035700/XS15G0173200	12
GO:0098660	inorganic ion transmembrane transport|BP	71/2857	331/17622	0.00698771	0.198732	0.189442	XS01G0004600/XS01G0027800/XS01G0239800/XS01G0270300/XS02G0001500/XS02G0080200/XS03G0003600/XS03G0107900/XS03G0125500/XS03G0126500/XS03G0228700/XS03G0236200/XS03G0236800/XS03G0251200/XS03G0309500/XS04G0065500/XS04G0104100/XS04G0165100/XS06G0008100/XS06G0013000/XS06G0058600/XS06G0058800/XS06G0059100/XS06G0059200/XS06G0070000/XS06G0070100/XS06G0147000/XS06G0147300/XS06G0154500/XS06G0174700/XS07G0003…	71
GO:0000377	RNA splicing, via transesterification reactions with bulged adenosine as nucleophile|BP	54/2857	241/17622	0.00714465	0.198732	0.189442	XS01G0371900/XS02G0045900/XS03G0030200/XS03G0031500/XS03G0045800/XS03G0113900/XS03G0157800/XS03G0187700/XS03G0260000/XS04G0131900/XS04G0154200/XS04G0154600/XS04G0206100/XS04G0227900/XS04G0285300/XS05G0027400/XS05G0040200/XS05G0084000/XS05G0084400/XS05G0243100/XS07G0143000/XS07G0243300/XS08G0024400/XS08G0060600/XS08G0135200/XS09G0176300/XS10G0004000/XS10G0020200/XS10G0063200/XS10G0070800/XS11G0008…	54
GO:0099023	tethering complex|CC	15/2857	48/17622	0.00715496	0.198732	0.189442	XS01G0163500/XS01G0323900/XS01G0381100/XS01G0381700/XS02G0125600/XS03G0232400/XS03G0303800/XS06G0120900/XS07G0100000/XS09G0236400/XS12G0012400/XS12G0235000/XSUnG0024900/XSUnG0134600/XSUnG0221800	15
GO:0000724	double-strand break repair via homologous recombination|BP	26/2857	99/17622	0.00715842	0.198732	0.189442	XS01G0364400/XS01G0372000/XS01G0375500/XS01G0376000/XS02G0112900/XS02G0135700/XS03G0214400/XS03G0267100/XS03G0325800/XS04G0189000/XS04G0198400/XS05G0147000/XS05G0243100/XS06G0029600/XS06G0059500/XS07G0061700/XS07G0298600/XS08G0100500/XS09G0137200/XS10G0147600/XS10G0176700/XS11G0045100/XS13G0191300/XS15G0009400/XS15G0102400/XSUnG0180400	26
GO:0000725	recombinational repair|BP	26/2857	99/17622	0.00715842	0.198732	0.189442	XS01G0364400/XS01G0372000/XS01G0375500/XS01G0376000/XS02G0112900/XS02G0135700/XS03G0214400/XS03G0267100/XS03G0325800/XS04G0189000/XS04G0198400/XS05G0147000/XS05G0243100/XS06G0029600/XS06G0059500/XS07G0061700/XS07G0298600/XS08G0100500/XS09G0137200/XS10G0147600/XS10G0176700/XS11G0045100/XS13G0191300/XS15G0009400/XS15G0102400/XSUnG0180400	26
GO:0051225	spindle assembly|BP	19/2857	66/17622	0.00717254	0.198732	0.189442	XS01G0375500/XS01G0376000/XS02G0055400/XS02G0078600/XS03G0174100/XS04G0134400/XS04G0198900/XS04G0199100/XS04G0229600/XS05G0148800/XS06G0097000/XS07G0092500/XS08G0091000/XS09G0107200/XS11G0084300/XS13G0018800/XS15G0057000/XSUnG0114100/XSUnG0229400	19
GO:1903050	regulation of proteolysis involved in cellular protein catabolic process|BP	19/2857	66/17622	0.00717254	0.198732	0.189442	XS02G0004000/XS02G0055400/XS03G0092900/XS03G0286900/XS03G0329700/XS04G0104100/XS04G0229600/XS05G0140700/XS07G0003000/XS07G0034100/XS07G0061700/XS08G0112000/XS08G0244400/XS09G0238400/XS10G0213700/XS11G0000300/XS12G0136900/XS13G0147100/XS14G0004000	19
GO:0071417	cellular response to organonitrogen compound|BP	22/2857	80/17622	0.00723016	0.199114	0.189806	XS02G0001500/XS03G0236200/XS03G0236800/XS03G0325800/XS06G0058600/XS06G0058800/XS06G0059100/XS06G0059200/XS06G0070000/XS06G0070100/XS06G0147000/XS06G0147300/XS06G0154500/XS07G0003000/XS09G0184400/XS09G0184700/XS10G0152400/XS11G0073500/XS14G0031400/XS15G0098900/XS15G0099200/XS15G0120500	22
GO:0009658	chloroplast organization|BP	53/2857	236/17622	0.00729566	0.199708	0.190372	XS01G0080500/XS01G0264000/XS01G0293200/XS01G0354500/XS01G0389200/XS01G0403900/XS02G0023500/XS02G0071500/XS03G0031100/XS03G0244100/XS03G0277200/XS04G0001900/XS04G0027400/XS04G0027500/XS04G0107900/XS04G0112700/XS05G0038100/XS05G0038200/XS05G0042600/XS05G0065700/XS05G0067500/XS05G0084000/XS05G0084400/XS05G0246900/XS06G0006300/XS07G0005100/XS07G0255100/XS07G0262800/XS08G0074500/XS08G0125200/XS09G0176…	53
GO:0022900	electron transport chain|BP	32/2857	129/17622	0.00772416	0.209363	0.199575	XS01G0228500/XS02G0080200/XS02G0217300/XS02G0222200/XS02G0289900/XS04G0018000/XS04G0019600/XS04G0171900/XS05G0110600/XS07G0005100/XS07G0246300/XS08G0156900/XS09G0063800/XS09G0178100/XS10G0204800/XS11G0025600/XS11G0158800/XS12G0105800/XS12G0239200/XS13G0219300/XS13G0259700/XS13G0260000/XS14G0009500/XS14G0085400/XS15G0143600/XSMtG0001300/XSPtG0004800/XSPtG0004900/XSPtG0006200/XSPtG0009300/XSPtG0009…	32
GO:0051656	establishment of organelle localization|BP	34/2857	139/17622	0.00774052	0.209363	0.199575	XS01G0003900/XS01G0080500/XS01G0364000/XS02G0023500/XS03G0244100/XS04G0104100/XS04G0172100/XS04G0198900/XS04G0199100/XS04G0243200/XS05G0038100/XS05G0038200/XS05G0065700/XS05G0246900/XS06G0006300/XS06G0082600/XS06G0154500/XS07G0005100/XS08G0155500/XS10G0183000/XS11G0025700/XS11G0158800/XS12G0044800/XS13G0015700/XS13G0047500/XS13G0051100/XS13G0063200/XS13G0185000/XS13G0242200/XS14G0004400/XS14G0100…	34
GO:0098797	plasma membrane protein complex|CC	18/2857	62/17622	0.00795175	0.213803	0.203809	XS01G0273300/XS01G0409700/XS02G0054800/XS03G0217000/XS03G0299800/XS04G0029200/XS04G0030300/XS04G0104100/XS05G0246900/XS06G0077600/XS06G0120400/XS08G0081100/XS08G0156900/XS10G0022600/XS10G0023700/XS10G0183000/XS13G0159700/XS14G0113600	18
GO:0045089	positive regulation of innate immune response|BP	48/2857	211/17622	0.00805093	0.215197	0.205137	XS01G0170200/XS01G0186700/XS01G0330300/XS02G0001500/XS02G0184000/XS02G0279100/XS03G0053800/XS03G0178900/XS03G0301400/XS04G0019300/XS04G0019500/XS04G0154600/XS06G0058600/XS06G0058800/XS06G0059100/XS06G0059200/XS06G0070000/XS06G0070100/XS06G0154500/XS06G0244600/XS07G0006900/XS07G0034100/XS07G0061700/XS07G0218600/XS08G0112000/XS09G0003400/XS09G0241800/XS09G0242300/XS10G0022600/XS10G0116200/XS10G0145…	48
GO:0033365	protein localization to organelle|BP	93/2857	453/17622	0.0082148	0.218293	0.208088	XS01G0003900/XS01G0051000/XS01G0283200/XS01G0290200/XS01G0305500/XS01G0309700/XS01G0381700/XS02G0009400/XS02G0051500/XS02G0055400/XS03G0020000/XS03G0031100/XS03G0053800/XS03G0064800/XS03G0137600/XS03G0137700/XS03G0188000/XS03G0223800/XS03G0231400/XS03G0292200/XS03G0303800/XS04G0065500/XS04G0229600/XS04G0237600/XS04G0239200/XS04G0243200/XS05G0000800/XS05G0061900/XS05G0067500/XS05G0123200/XS05G0246…	93
GO:0032270	positive regulation of cellular protein metabolic process|BP	46/2857	201/17622	0.00834619	0.22039	0.210088	XS01G0000800/XS01G0239800/XS01G0264000/XS02G0004000/XS02G0055400/XS02G0112900/XS02G0288000/XS03G0000700/XS03G0030200/XS03G0031500/XS03G0092900/XS03G0107900/XS03G0132800/XS03G0176900/XS03G0202800/XS03G0329700/XS04G0104100/XS04G0227800/XS04G0227900/XS04G0229600/XS05G0000800/XS05G0035500/XS05G0266100/XS06G0121100/XS06G0154500/XS06G0236700/XS07G0034100/XS07G0061700/XS07G0078100/XS07G0162900/XS08G0035…	46
GO:0006289	nucleotide-excision repair|BP	19/2857	67/17622	0.00852374	0.22039	0.210088	XS01G0243500/XS02G0100300/XS03G0011500/XS03G0030200/XS03G0031500/XS03G0157800/XS03G0267100/XS04G0189000/XS05G0105800/XS06G0008900/XS08G0080600/XS08G0085700/XS10G0020200/XS10G0176700/XS10G0213700/XS12G0136900/XS12G0185100/XS14G0004000/XSUnG0174900	19
GO:1903362	regulation of cellular protein catabolic process|BP	19/2857	67/17622	0.00852374	0.22039	0.210088	XS02G0004000/XS02G0055400/XS03G0092900/XS03G0286900/XS03G0329700/XS04G0104100/XS04G0229600/XS05G0140700/XS07G0003000/XS07G0034100/XS07G0061700/XS08G0112000/XS08G0244400/XS09G0238400/XS10G0213700/XS11G0000300/XS12G0136900/XS13G0147100/XS14G0004000	19
GO:0005543	phospholipid binding|MF	35/2857	145/17622	0.00863325	0.22039	0.210088	XS01G0065400/XS01G0302800/XS01G0309400/XS01G0385600/XS01G0385900/XS01G0390500/XS02G0018800/XS02G0216500/XS02G0216700/XS03G0132800/XS03G0137700/XS03G0224400/XS03G0239200/XS03G0254500/XS04G0015100/XS04G0016300/XS04G0109300/XS04G0118700/XS04G0198900/XS04G0199100/XS05G0001700/XS06G0114600/XS06G0259800/XS07G0019700/XS07G0266100/XS07G0296000/XS09G0107000/XS09G0210600/XS10G0081100/XS11G0072000/XS11G0188…	35
GO:0002684	positive regulation of immune system process|BP	56/2857	254/17622	0.00877553	0.222108	0.211725	XS01G0170200/XS01G0186700/XS01G0330300/XS02G0001500/XS02G0184000/XS02G0279100/XS03G0053800/XS03G0178900/XS03G0187700/XS03G0301400/XS03G0325800/XS04G0019300/XS04G0019500/XS04G0104100/XS04G0154600/XS04G0204500/XS05G0040200/XS06G0058600/XS06G0058800/XS06G0059100/XS06G0059200/XS06G0070000/XS06G0070100/XS06G0154500/XS06G0244600/XS07G0006900/XS07G0034100/XS07G0061700/XS07G0078100/XS07G0218600/XS08G0112…	56
GO:0046471	phosphatidylglycerol metabolic process|BP	15/2857	49/17622	0.00879831	0.222108	0.211725	XS01G0295000/XS01G0369000/XS03G0244100/XS04G0192000/XS05G0038100/XS05G0038200/XS06G0126000/XS08G0140400/XS08G0140600/XS10G0160400/XS13G0015700/XS13G0242200/XS15G0045300/XS15G0111900/XSUnG0218800	15
GO:0007051	spindle organization|BP	25/2857	96/17622	0.00922552	0.2312	0.220392	XS01G0375500/XS01G0376000/XS02G0055400/XS02G0078600/XS03G0174100/XS04G0134400/XS04G0198900/XS04G0199100/XS04G0229600/XS05G0148800/XS06G0097000/XS06G0182500/XS07G0092500/XS08G0091000/XS09G0107200/XS11G0084300/XS11G0220500/XS12G0040700/XS12G0235600/XS13G0018800/XS13G0029500/XS14G0103500/XS15G0057000/XSUnG0114100/XSUnG0229400	25
GO:0030111	regulation of Wnt signaling pathway|BP	11/2857	32/17622	0.00936196	0.2312	0.220392	XS01G0186700/XS02G0279100/XS03G0092900/XS04G0192700/XS04G0229600/XS06G0265200/XS07G0034100/XS07G0061700/XS09G0231600/XS12G0035700/XS13G0077900	11
GO:1900056	negative regulation of leaf senescence|BP	11/2857	32/17622	0.00936196	0.2312	0.220392	XS01G0024400/XS01G0065400/XS01G0403900/XS01G0405900/XS03G0239200/XS05G0127800/XS06G0114600/XS12G0254900/XS12G0256400/XS13G0057700/XS14G0087000	11
GO:1905622	negative regulation of leaf development|BP	11/2857	32/17622	0.00936196	0.2312	0.220392	XS01G0024400/XS01G0065400/XS01G0403900/XS01G0405900/XS03G0239200/XS05G0127800/XS06G0114600/XS12G0254900/XS12G0256400/XS13G0057700/XS14G0087000	11
GO:0006664	glycolipid metabolic process|BP	27/2857	106/17622	0.00953325	0.232898	0.222011	XS01G0000100/XS01G0046100/XS01G0194300/XS01G0234400/XS01G0399600/XS02G0125800/XS03G0188300/XS04G0157300/XS06G0013000/XS06G0176100/XS06G0246100/XS07G0008200/XS08G0243500/XS09G0022900/XS10G0011400/XS11G0157200/XS11G0157800/XS12G0061400/XS12G0238400/XS13G0032400/XS14G0027700/XS14G0036800/XS14G0104600/XS15G0026300/XS15G0096900/XSUnG0025800/XSUnG0093300	27
GO:0008375	acetylglucosaminyltransferase activity|MF	14/2857	45/17622	0.00960518	0.233401	0.22249	XS01G0168800/XS01G0194300/XS02G0005500/XS03G0070000/XS03G0229800/XS04G0255600/XS05G0240700/XS06G0225700/XS06G0246100/XS08G0109000/XS11G0157200/XS11G0157800/XSUnG0093300/XSUnG0207400	14
GO:0016570	histone modification|BP	74/2857	352/17622	0.00978627	0.235285	0.224286	XS01G0000800/XS01G0112600/XS01G0127600/XS01G0263900/XS01G0266100/XS01G0275100/XS01G0320300/XS01G0375500/XS01G0376000/XS02G0055400/XS02G0135700/XS02G0288500/XS03G0132800/XS03G0202800/XS03G0204900/XS03G0266600/XS03G0286900/XS03G0330700/XS04G0029800/XS04G0030200/XS04G0151400/XS04G0227900/XS04G0263100/XS05G0107100/XS05G0148800/XS06G0059500/XS06G0088300/XS06G0088900/XS06G0163200/XS06G0182500/XS06G0236…	74
GO:0043484	regulation of RNA splicing|BP	15/2857	50/17622	0.0107269	0.255461	0.243519	XS01G0394200/XS02G0045900/XS04G0154200/XS04G0227900/XS05G0040200/XS05G0243100/XS07G0143000/XS10G0063200/XS12G0037200/XS12G0155400/XS13G0146900/XS14G0044800/XS14G0048000/XSUnG0011100/XSUnG0174900	15
GO:0048584	positive regulation of response to stimulus|BP	92/2857	452/17622	0.0107379	0.255461	0.243519	XS01G0027800/XS01G0170200/XS01G0186700/XS01G0313900/XS01G0330300/XS01G0405900/XS02G0001500/XS02G0004000/XS02G0184000/XS02G0279100/XS03G0053800/XS03G0092900/XS03G0132800/XS03G0178900/XS03G0202800/XS03G0224400/XS03G0299800/XS03G0301400/XS04G0019300/XS04G0019500/XS04G0079700/XS04G0104100/XS04G0154600/XS04G0204500/XS04G0227900/XS04G0229600/XS04G0256700/XS05G0253400/XS06G0058600/XS06G0058800/XS06G0059…	92
GO:0050778	positive regulation of immune response|BP	53/2857	241/17622	0.0110857	0.257007	0.244993	XS01G0170200/XS01G0186700/XS01G0330300/XS02G0001500/XS02G0184000/XS02G0279100/XS03G0053800/XS03G0178900/XS03G0301400/XS04G0019300/XS04G0019500/XS04G0104100/XS04G0154600/XS04G0204500/XS06G0058600/XS06G0058800/XS06G0059100/XS06G0059200/XS06G0070000/XS06G0070100/XS06G0154500/XS06G0244600/XS07G0006900/XS07G0034100/XS07G0061700/XS07G0078100/XS07G0218600/XS08G0112000/XS09G0003400/XS09G0241800/XS09G0242…	53
GO:0051247	positive regulation of protein metabolic process|BP	48/2857	215/17622	0.0114521	0.264155	0.251806	XS01G0000800/XS01G0239800/XS01G0264000/XS02G0004000/XS02G0055400/XS02G0112900/XS02G0288000/XS03G0000700/XS03G0030200/XS03G0031500/XS03G0092900/XS03G0107900/XS03G0132800/XS03G0176900/XS03G0202800/XS03G0329700/XS04G0104100/XS04G0227800/XS04G0227900/XS04G0229600/XS05G0000800/XS05G0035500/XS05G0266100/XS06G0121100/XS06G0154500/XS06G0236700/XS07G0034100/XS07G0061700/XS07G0078100/XS07G0162900/XS08G0035…	48
GO:0000413	protein peptidyl-prolyl isomerization|BP	11/2857	33/17622	0.0120277	0.274643	0.261804	XS01G0301800/XS02G0022200/XS02G0149200/XS03G0260000/XS03G0292200/XS07G0134100/XS08G0011200/XS10G0212900/XS11G0224100/XS14G0176500/XSUnG0033200	11
GO:0060070	canonical Wnt signaling pathway|BP	11/2857	33/17622	0.0120277	0.274643	0.261804	XS01G0186700/XS02G0279100/XS03G0092900/XS04G0104100/XS04G0192700/XS04G0229600/XS06G0265200/XS07G0034100/XS07G0061700/XS09G0231600/XS13G0077900	11
GO:0016607	nuclear speck|CC	26/2857	103/17622	0.0121787	0.276701	0.263766	XS01G0358200/XS01G0364000/XS01G0386600/XS01G0394200/XS02G0045900/XS03G0260000/XS03G0333400/XS04G0154600/XS04G0227900/XS05G0040200/XS05G0079300/XS07G0143000/XS10G0004000/XS10G0063200/XS11G0080000/XS11G0150800/XS11G0220500/XS12G0035700/XS13G0076200/XS13G0138600/XS13G0146900/XS13G0147100/XS13G0175000/XS14G0048000/XS14G0176500/XSUnG0198500	26
GO:0016579	protein deubiquitination|BP	17/2857	60/17622	0.0125403	0.279867	0.266784	XS01G0275100/XS02G0055400/XS02G0135700/XS03G0090100/XS03G0286900/XS05G0140700/XS06G0059500/XS07G0061700/XS08G0244400/XS09G0162400/XS10G0213700/XS11G0000300/XS11G0014200/XS11G0220500/XS12G0136900/XS13G0063200/XS14G0004000	17
GO:0051260	protein homooligomerization|BP	17/2857	60/17622	0.0125403	0.279867	0.266784	XS03G0251200/XS03G0267100/XS04G0114500/XS04G0198900/XS04G0199100/XS04G0225200/XS06G0121700/XS10G0128900/XS10G0129200/XS10G0215300/XS11G0073500/XS12G0035700/XS12G0060400/XS13G0080000/XS14G0100100/XS15G0180500/XSUnG0180400	17
GO:0016482	cytosolic transport|BP	13/2857	42/17622	0.012917	0.280125	0.26703	XS01G0003900/XS02G0200600/XS03G0223800/XS04G0239200/XS05G0076500/XS07G0213000/XS08G0123800/XS10G0004200/XS12G0235000/XS13G0252900/XS15G0017400/XS15G0154100/XSUnG0137600	13
GO:0009895	negative regulation of catabolic process|BP	15/2857	51/17622	0.0129723	0.280125	0.26703	XS01G0198500/XS01G0364000/XS02G0023500/XS02G0112900/XS03G0081400/XS04G0104100/XS07G0003000/XS08G0168200/XS10G0092300/XS12G0192600/XS14G0044800/XSUnG0060100/XSUnG0107000/XSUnG0195100/XSUnG0200700	15
GO:0005982	starch metabolic process|BP	36/2857	154/17622	0.0130246	0.280125	0.26703	XS01G0221200/XS01G0230600/XS01G0241100/XS01G0358500/XS01G0369000/XS03G0130200/XS03G0244100/XS04G0264000/XS05G0038100/XS05G0038200/XS05G0087300/XS05G0246900/XS05G0248700/XS05G0266700/XS05G0267200/XS06G0005600/XS07G0008300/XS07G0116700/XS07G0246300/XS08G0033300/XS09G0178100/XS10G0052600/XS10G0160400/XS11G0177200/XS12G0111200/XS12G0142100/XS12G0222600/XS12G0238400/XS13G0051100/XS13G0106100/XS13G0108…	36
GO:0046488	phosphatidylinositol metabolic process|BP	27/2857	109/17622	0.0138506	0.290134	0.276571	XS01G0046100/XS01G0110400/XS01G0194300/XS01G0234400/XS02G0112900/XS03G0152500/XS04G0157300/XS05G0144900/XS06G0246100/XS07G0008200/XS08G0075500/XS08G0109000/XS08G0139800/XS08G0243500/XS10G0011400/XS10G0178100/XS10G0178300/XS11G0155900/XS11G0157200/XS11G0157800/XS11G0220300/XS12G0091000/XS12G0191100/XS14G0027700/XS14G0080100/XSUnG0032800/XSUnG0093300	27
GO:0048585	negative regulation of response to stimulus|BP	93/2857	462/17622	0.0138554	0.290134	0.276571	XS01G0000800/XS01G0032100/XS01G0133500/XS01G0186700/XS01G0285500/XS01G0308800/XS01G0309400/XS02G0004000/XS02G0013000/XS02G0049900/XS02G0200600/XS02G0279100/XS03G0092900/XS03G0224400/XS03G0263100/XS03G0267100/XS03G0299800/XS03G0325800/XS03G0333600/XS04G0104100/XS04G0112000/XS04G0134400/XS04G0156500/XS04G0167000/XS04G0192700/XS04G0202900/XS04G0204500/XS04G0236600/XS04G0240000/XS04G0255400/XS05G0007…	93
GO:0006283	transcription-coupled nucleotide-excision repair|BP	12/2857	38/17622	0.0140761	0.293403	0.279687	XS01G0243500/XS03G0030200/XS03G0031500/XS03G0157800/XS04G0189000/XS05G0105800/XS10G0020200/XS10G0176700/XS10G0213700/XS12G0136900/XS14G0004000/XSUnG0174900	12
GO:0098655	cation transmembrane transport|BP	68/2857	325/17622	0.0142282	0.293434	0.279716	XS01G0004600/XS01G0239800/XS01G0250800/XS01G0286700/XS02G0001500/XS02G0080200/XS03G0003600/XS03G0107900/XS03G0125500/XS03G0126500/XS03G0228700/XS03G0236200/XS03G0236800/XS03G0251200/XS03G0309500/XS04G0065500/XS04G0104100/XS04G0165100/XS06G0008100/XS06G0008600/XS06G0008700/XS06G0013000/XS06G0058600/XS06G0058800/XS06G0059100/XS06G0059200/XS06G0070000/XS06G0070100/XS06G0147000/XS06G0147300/XS06G0154…	68
GO:0009902	chloroplast relocation|BP	20/2857	75/17622	0.0143278	0.293434	0.279716	XS01G0080500/XS02G0023500/XS03G0244100/XS05G0038100/XS05G0038200/XS05G0065700/XS05G0246900/XS06G0006300/XS07G0005100/XS11G0025700/XS11G0158800/XS12G0044800/XS13G0015700/XS13G0047500/XS13G0051100/XS13G0185000/XS13G0242200/XS14G0004400/XS15G0179600/XSUnG0138000	20
GO:0051667	establishment of plastid localization|BP	20/2857	75/17622	0.0143278	0.293434	0.279716	XS01G0080500/XS02G0023500/XS03G0244100/XS05G0038100/XS05G0038200/XS05G0065700/XS05G0246900/XS06G0006300/XS07G0005100/XS11G0025700/XS11G0158800/XS12G0044800/XS13G0015700/XS13G0047500/XS13G0051100/XS13G0185000/XS13G0242200/XS14G0004400/XS15G0179600/XSUnG0138000	20
GO:0006368	transcription elongation from RNA polymerase II promoter|BP	14/2857	47/17622	0.0143505	0.293434	0.279716	XS01G0127600/XS01G0275100/XS01G0361500/XS03G0030200/XS03G0031500/XS03G0157800/XS03G0202800/XS05G0105800/XS09G0229800/XS10G0020200/XS10G0194800/XS12G0034700/XS15G0021600/XSUnG0174900	14
GO:0046486	glycerolipid metabolic process|BP	55/2857	255/17622	0.0144005	0.293434	0.279716	XS01G0046100/XS01G0110400/XS01G0180100/XS01G0181000/XS01G0181400/XS01G0194300/XS01G0234400/XS01G0295000/XS01G0369000/XS01G0390500/XS02G0112900/XS03G0152500/XS03G0244100/XS04G0047500/XS04G0157300/XS04G0192000/XS05G0038100/XS05G0038200/XS05G0144900/XS06G0126000/XS06G0246100/XS07G0008200/XS07G0282300/XS08G0075500/XS08G0109000/XS08G0139800/XS08G0140400/XS08G0140600/XS08G0243500/XS09G0085200/XS09G0210…	55
GO:0022839	ion gated channel activity|MF	24/2857	95/17622	0.0154242	0.31289	0.298263	XS02G0000100/XS02G0001500/XS02G0100100/XS03G0236200/XS03G0236800/XS04G0070700/XS06G0058600/XS06G0058800/XS06G0059100/XS06G0059200/XS06G0070000/XS06G0070100/XS06G0070200/XS06G0147000/XS06G0147300/XS09G0001100/XS11G0023100/XS13G0045300/XS15G0098900/XS15G0099200/XS15G0120500/XS15G0132800/XS15G0180500/XSUnG0214800	24
GO:0030658	transport vesicle membrane|CC	15/2857	52/17622	0.0155667	0.313382	0.298732	XS01G0336700/XS03G0223800/XS04G0172100/XS05G0076500/XS05G0143400/XS06G0077600/XS06G0082800/XS10G0152400/XS11G0136000/XS11G0195500/XS13G0159700/XS13G0217800/XS13G0252900/XS14G0113600/XS15G0173200	15
GO:0044786	cell cycle DNA replication|BP	26/2857	105/17622	0.0155863	0.313382	0.298732	XS01G0203900/XS01G0375500/XS01G0376000/XS02G0078600/XS03G0263900/XS03G0265200/XS03G0297400/XS04G0029800/XS04G0172100/XS04G0232600/XS05G0127800/XS06G0125200/XS07G0092500/XS08G0085700/XS10G0030400/XS10G0176700/XS10G0178300/XS11G0118600/XS12G0024100/XS12G0250400/XS13G0069800/XS13G0077900/XS15G0000800/XS15G0102400/XS15G0173200/XSUnG0067100	26
GO:0006783	heme biosynthetic process|BP	13/2857	43/17622	0.0158327	0.316932	0.302116	XS01G0223200/XS01G0349500/XS02G0266700/XS03G0091100/XS05G0090800/XS07G0295900/XS08G0087600/XS09G0063800/XS15G0008700/XS15G0115700/XSUnG0053100/XSUnG0119700/XSUnG0167300	13
GO:0051049	regulation of transport|BP	70/2857	338/17622	0.0163115	0.318894	0.303986	XS01G0000800/XS01G0010700/XS01G0091100/XS01G0163500/XS01G0239800/XS01G0381700/XS02G0004000/XS02G0080200/XS02G0145400/XS02G0184000/XS03G0003600/XS03G0107900/XS03G0125500/XS03G0126500/XS03G0132800/XS03G0260000/XS03G0274700/XS03G0309500/XS04G0070700/XS04G0172100/XS04G0198900/XS04G0199100/XS04G0239200/XS05G0119900/XS05G0256300/XS06G0013000/XS06G0154500/XS07G0005100/XS07G0143300/XS07G0183300/XS07G0192…	70
GO:0009055	electron transfer activity|MF	39/2857	172/17622	0.0164997	0.318894	0.303986	XS01G0214800/XS01G0228500/XS01G0265200/XS01G0377700/XS01G0378200/XS02G0217300/XS02G0222200/XS03G0244000/XS03G0263700/XS04G0171900/XS04G0273400/XS05G0129600/XS06G0013500/XS06G0122700/XS07G0013700/XS08G0138200/XS08G0156900/XS08G0227500/XS09G0117400/XS09G0178100/XS10G0155000/XS11G0025600/XS12G0067900/XS12G0107900/XS13G0219300/XS13G0235700/XS14G0009500/XS14G0085400/XS14G0143900/XS15G0143600/XSMtG0001…	39
GO:0015085	calcium ion transmembrane transporter activity|MF	20/2857	76/17622	0.0165602	0.318894	0.303986	XS02G0001500/XS03G0236200/XS03G0236800/XS04G0104100/XS06G0058600/XS06G0058800/XS06G0059100/XS06G0059200/XS06G0070000/XS06G0070100/XS06G0147000/XS06G0147300/XS09G0001100/XS09G0062000/XS10G0020700/XS15G0098900/XS15G0099200/XS15G0120500/XS15G0132800/XSUnG0219800	20
GO:0019750	chloroplast localization|BP	20/2857	76/17622	0.0165602	0.318894	0.303986	XS01G0080500/XS02G0023500/XS03G0244100/XS05G0038100/XS05G0038200/XS05G0065700/XS05G0246900/XS06G0006300/XS07G0005100/XS11G0025700/XS11G0158800/XS12G0044800/XS13G0015700/XS13G0047500/XS13G0051100/XS13G0185000/XS13G0242200/XS14G0004400/XS15G0179600/XSUnG0138000	20
GO:0051644	plastid localization|BP	20/2857	76/17622	0.0165602	0.318894	0.303986	XS01G0080500/XS02G0023500/XS03G0244100/XS05G0038100/XS05G0038200/XS05G0065700/XS05G0246900/XS06G0006300/XS07G0005100/XS11G0025700/XS11G0158800/XS12G0044800/XS13G0015700/XS13G0047500/XS13G0051100/XS13G0185000/XS13G0242200/XS14G0004400/XS15G0179600/XSUnG0138000	20
GO:0009524	phragmoplast|CC	30/2857	126/17622	0.0171693	0.32438	0.309216	XS01G0106400/XS01G0182400/XS01G0183400/XS01G0300200/XS01G0401800/XS02G0055400/XS03G0177700/XS04G0134400/XS06G0097000/XS07G0053200/XS07G0092500/XS07G0293900/XS08G0091000/XS08G0205400/XS09G0236400/XS11G0068600/XS11G0084300/XS11G0164800/XS12G0235600/XS13G0018800/XS13G0045400/XS13G0131600/XS13G0171100/XS15G0057000/XS15G0112300/XS15G0143300/XS15G0171700/XSUnG0021000/XSUnG0196800/XSUnG0214800	30
GO:0006486	protein glycosylation|BP	41/2857	183/17622	0.017305	0.32438	0.309216	XS01G0237900/XS01G0381700/XS02G0005500/XS03G0043600/XS03G0229800/XS03G0288200/XS03G0303800/XS04G0065500/XS04G0079700/XS04G0104100/XS04G0172100/XS04G0255600/XS04G0285300/XS05G0043800/XS05G0046900/XS06G0022200/XS06G0239900/XS06G0266200/XS07G0008200/XS08G0135200/XS08G0250300/XS09G0162400/XS11G0004700/XS11G0080700/XS11G0080800/XS11G0090100/XS12G0032400/XS12G0043400/XS12G0061400/XS13G0148500/XS14G0018…	41
GO:0043413	macromolecule glycosylation|BP	41/2857	183/17622	0.017305	0.32438	0.309216	XS01G0237900/XS01G0381700/XS02G0005500/XS03G0043600/XS03G0229800/XS03G0288200/XS03G0303800/XS04G0065500/XS04G0079700/XS04G0104100/XS04G0172100/XS04G0255600/XS04G0285300/XS05G0043800/XS05G0046900/XS06G0022200/XS06G0239900/XS06G0266200/XS07G0008200/XS08G0135200/XS08G0250300/XS09G0162400/XS11G0004700/XS11G0080700/XS11G0080800/XS11G0090100/XS12G0032400/XS12G0043400/XS12G0061400/XS13G0148500/XS14G0018…	41
GO:0000288	nuclear-transcribed mRNA catabolic process, deadenylation-dependent decay|BP	14/2857	48/17622	0.0173133	0.32438	0.309216	XS01G0386600/XS03G0030200/XS03G0031500/XS03G0247000/XS07G0240200/XS08G0035700/XS08G0250100/XS09G0236600/XS12G0034700/XS12G0035600/XS12G0119500/XS12G0120100/XS13G0108700/XS13G0194300	14
GO:0009522	photosystem I|CC	12/2857	39/17622	0.0174054	0.32438	0.309216	XS03G0213800/XS06G0009000/XS06G0022000/XS07G0069900/XS10G0204800/XS15G0130400/XSPtG0002700/XSPtG0004200/XSPtG0005400/XSPtG0009400/XSUnG0045100/XSUnG0211300	12
GO:0016569	covalent chromatin modification|BP	78/2857	383/17622	0.0174183	0.32438	0.309216	XS01G0000800/XS01G0112600/XS01G0127600/XS01G0263900/XS01G0266100/XS01G0275100/XS01G0320300/XS01G0375500/XS01G0376000/XS02G0055400/XS02G0135700/XS02G0288500/XS03G0132800/XS03G0187700/XS03G0202800/XS03G0204900/XS03G0266600/XS03G0286900/XS03G0330700/XS04G0029800/XS04G0030200/XS04G0151400/XS04G0227900/XS04G0263100/XS05G0107100/XS05G0148800/XS06G0059500/XS06G0088300/XS06G0088900/XS06G0163200/XS06G0182…	78
GO:0043161	proteasome-mediated ubiquitin-dependent protein catabolic process|BP	47/2857	215/17622	0.0177373	0.325636	0.310414	XS01G0041200/XS01G0186700/XS01G0305500/XS02G0004000/XS02G0016000/XS02G0055400/XS02G0200600/XS02G0279100/XS03G0092900/XS03G0147400/XS03G0265200/XS03G0286900/XS03G0329700/XS04G0104100/XS04G0192700/XS04G0229600/XS05G0140700/XS06G0008900/XS06G0125200/XS07G0003000/XS07G0034100/XS07G0061700/XS07G0079400/XS08G0112000/XS08G0140800/XS08G0168200/XS08G0244400/XS09G0183800/XS09G0231600/XS09G0238400/XS10G0004…	47
GO:0051640	organelle localization|BP	45/2857	205/17622	0.0186506	0.338826	0.322987	XS01G0003900/XS01G0080500/XS01G0163500/XS01G0279800/XS01G0323900/XS01G0364000/XS02G0023500/XS02G0055400/XS03G0020000/XS03G0244100/XS04G0104100/XS04G0134400/XS04G0172100/XS04G0198900/XS04G0199100/XS04G0243200/XS05G0038100/XS05G0038200/XS05G0065700/XS05G0246900/XS06G0006300/XS06G0082600/XS06G0154500/XS07G0005100/XS07G0213000/XS08G0091000/XS08G0155500/XS10G0183000/XS11G0025700/XS11G0068600/XS11G0158…	45
GO:0016616	oxidoreductase activity, acting on the CH-OH group of donors, NAD or NADP as acceptor|MF	58/2857	275/17622	0.0190249	0.338826	0.322987	XS01G0139500/XS01G0237300/XS01G0252500/XS01G0254900/XS01G0311500/XS01G0311600/XS01G0311700/XS01G0312300/XS01G0313700/XS01G0397900/XS01G0398100/XS02G0000200/XS02G0001300/XS02G0005900/XS02G0042900/XS02G0081700/XS02G0203600/XS02G0287600/XS03G0005200/XS03G0026400/XS03G0095300/XS03G0134800/XS03G0135000/XS03G0310000/XS04G0027400/XS04G0027500/XS04G0125600/XS04G0180200/XS04G0225200/XS05G0102000/XS05G0102…	58
GO:0000271	polysaccharide biosynthetic process|BP	88/2857	440/17622	0.0190566	0.338826	0.322987	XS01G0068400/XS01G0221200/XS01G0230600/XS01G0241100/XS01G0288500/XS01G0288600/XS01G0358500/XS01G0363400/XS01G0364300/XS01G0364400/XS01G0369000/XS01G0381700/XS01G0398800/XS02G0226000/XS02G0290000/XS03G0053800/XS03G0130200/XS03G0244100/XS03G0259000/XS03G0272800/XS03G0295900/XS03G0309500/XS04G0063800/XS04G0064100/XS04G0167000/XS04G0264000/XS04G0289000/XS05G0038100/XS05G0038200/XS05G0040200/XS05G0043…	88
GO:0006655	phosphatidylglycerol biosynthetic process|BP	13/2857	44/17622	0.0192227	0.338826	0.322987	XS01G0295000/XS01G0369000/XS03G0244100/XS05G0038100/XS05G0038200/XS06G0126000/XS08G0140400/XS08G0140600/XS10G0160400/XS13G0015700/XS13G0242200/XS15G0045300/XSUnG0218800	13
GO:0007050	cell cycle arrest|BP	13/2857	44/17622	0.0192227	0.338826	0.322987	XS01G0186700/XS01G0375500/XS01G0376000/XS02G0065500/XS02G0279100/XS03G0187700/XS07G0034100/XS07G0061700/XS08G0104900/XS09G0072700/XS13G0077900/XS13G0147100/XS14G0044800	13
GO:0030176	integral component of endoplasmic reticulum membrane|CC	13/2857	44/17622	0.0192227	0.338826	0.322987	XS01G0046100/XS01G0234200/XS01G0234400/XS02G0051500/XS04G0157300/XS05G0050300/XS05G0233600/XS08G0114800/XS08G0243500/XS11G0090100/XS12G0032400/XS14G0065900/XS15G0088500	13
GO:0031227	intrinsic component of endoplasmic reticulum membrane|CC	13/2857	44/17622	0.0192227	0.338826	0.322987	XS01G0046100/XS01G0234200/XS01G0234400/XS02G0051500/XS04G0157300/XS05G0050300/XS05G0233600/XS08G0114800/XS08G0243500/XS11G0090100/XS12G0032400/XS14G0065900/XS15G0088500	13
GO:0031330	negative regulation of cellular catabolic process|BP	13/2857	44/17622	0.0192227	0.338826	0.322987	XS01G0198500/XS02G0023500/XS02G0112900/XS03G0081400/XS04G0104100/XS07G0003000/XS08G0168200/XS10G0092300/XS12G0192600/XS14G0044800/XSUnG0060100/XSUnG0107000/XSUnG0200700	13
GO:0006487	protein N-linked glycosylation|BP	21/2857	82/17622	0.019363	0.338826	0.322987	XS01G0381700/XS02G0005500/XS03G0043600/XS04G0172100/XS04G0255600/XS05G0046900/XS06G0022200/XS06G0239900/XS07G0008200/XS09G0162400/XS11G0004700/XS11G0080700/XS11G0080800/XS11G0090100/XS12G0032400/XS12G0043400/XS15G0088500/XS15G0173200/XS15G0179800/XSUnG0194400/XSUnG0245200	21
GO:0007034	vacuolar transport|BP	28/2857	117/17622	0.0194698	0.338826	0.322987	XS01G0163500/XS01G0232700/XS01G0381700/XS03G0137700/XS03G0223800/XS03G0292200/XS04G0065500/XS04G0198900/XS04G0199100/XS04G0239200/XS05G0076500/XS06G0084400/XS07G0019000/XS07G0213000/XS07G0293900/XS08G0120100/XS08G0123800/XS08G0245300/XS10G0049200/XS10G0175200/XS11G0014200/XS11G0188200/XS13G0211300/XS13G0252900/XS14G0175000/XS15G0154100/XSUnG0200700/XSUnG0245200	28
GO:0060627	regulation of vesicle-mediated transport|BP	16/2857	58/17622	0.019548	0.338826	0.322987	XS01G0010700/XS01G0163500/XS01G0381700/XS02G0004000/XS04G0172100/XS04G0198900/XS04G0199100/XS04G0239200/XS06G0154500/XS07G0183300/XS09G0183800/XS10G0183000/XS12G0020700/XS13G0095900/XS15G0154100/XS15G0173200	16
GO:0010207	photosystem II assembly|BP	22/2857	87/17622	0.0195765	0.338826	0.322987	XS01G0080500/XS01G0141700/XS01G0170900/XS01G0207600/XS02G0080200/XS03G0031100/XS04G0112700/XS05G0045700/XS05G0066600/XS05G0066900/XS05G0246900/XS07G0005100/XS07G0069900/XS07G0246300/XS08G0256600/XS11G0158800/XS12G0222600/XS13G0047500/XS13G0051100/XS13G0185000/XS14G0004400/XSUnG0138000	22
GO:0018205	peptidyl-lysine modification|BP	66/2857	319/17622	0.0196022	0.338826	0.322987	XS01G0000800/XS01G0112600/XS01G0127600/XS01G0266100/XS01G0275100/XS01G0288600/XS01G0375500/XS01G0376000/XS01G0381700/XS02G0055400/XS02G0288500/XS03G0095100/XS03G0132800/XS03G0173000/XS03G0202800/XS03G0204900/XS03G0266600/XS03G0325800/XS04G0029800/XS04G0151400/XS04G0227900/XS04G0263100/XS05G0038100/XS05G0038200/XS05G0079300/XS05G0148800/XS06G0059500/XS06G0131200/XS06G0163200/XS06G0182500/XS06G0265…	66
GO:1903509	liposaccharide metabolic process|BP	27/2857	112/17622	0.0196108	0.338826	0.322987	XS01G0000100/XS01G0046100/XS01G0194300/XS01G0234400/XS01G0399600/XS02G0125800/XS03G0188300/XS04G0157300/XS06G0013000/XS06G0176100/XS06G0246100/XS07G0008200/XS08G0243500/XS09G0022900/XS10G0011400/XS11G0157200/XS11G0157800/XS12G0061400/XS12G0238400/XS13G0032400/XS14G0027700/XS14G0036800/XS14G0104600/XS15G0026300/XS15G0096900/XSUnG0025800/XSUnG0093300	27
GO:0031331	positive regulation of cellular catabolic process|BP	23/2857	92/17622	0.019708	0.339217	0.32336	XS02G0004000/XS02G0055400/XS03G0030200/XS03G0031500/XS03G0053500/XS03G0092900/XS03G0247000/XS03G0329700/XS04G0104100/XS04G0229600/XS05G0040200/XS06G0236700/XS07G0034100/XS07G0241000/XS08G0038700/XS08G0104900/XS08G0112000/XS09G0022100/XS09G0238400/XS13G0000300/XS13G0138600/XS13G0146900/XS13G0147100	23
GO:0006612	protein targeting to membrane|BP	38/2857	169/17622	0.0201704	0.345866	0.329697	XS01G0309700/XS02G0051500/XS02G0145400/XS03G0003600/XS03G0091100/XS03G0278100/XS04G0134400/XS04G0167000/XS04G0257200/XS05G0246900/XS05G0255900/XS06G0013800/XS06G0032500/XS06G0123500/XS07G0006900/XS07G0036100/XS07G0192200/XS07G0213000/XS07G0246300/XS08G0024400/XS08G0025100/XS08G0087600/XS08G0091000/XS08G0114800/XS10G0116000/XS10G0160400/XS10G0215300/XS11G0159900/XS12G0071400/XS12G0109000/XS12G0203…	38
GO:0034250	positive regulation of cellular amide metabolic process|BP	12/2857	40/17622	0.0212923	0.361016	0.344139	XS01G0264000/XS02G0288000/XS03G0030200/XS03G0031500/XS05G0035500/XS05G0266100/XS06G0121100/XS08G0035700/XS09G0072700/XS09G0145800/XS11G0224700/XSUnG0196800	12
GO:0048024	regulation of mRNA splicing, via spliceosome|BP	12/2857	40/17622	0.0212923	0.361016	0.344139	XS02G0045900/XS04G0154200/XS04G0227900/XS05G0040200/XS05G0243100/XS07G0143000/XS10G0063200/XS12G0037200/XS12G0155400/XS13G0146900/XS14G0048000/XSUnG0011100	12
GO:2000024	regulation of leaf development|BP	20/2857	78/17622	0.0218324	0.363873	0.346863	XS01G0024400/XS01G0065400/XS01G0296900/XS01G0340300/XS01G0403900/XS01G0405900/XS03G0239200/XS03G0263100/XS04G0240000/XS04G0253500/XS05G0127800/XS06G0114600/XS09G0144900/XS12G0087400/XS12G0254900/XS12G0256400/XS13G0052300/XS13G0057700/XS14G0087000/XS15G0169600	20
GO:0030660	Golgi-associated vesicle membrane|CC	16/2857	59/17622	0.0228994	0.378382	0.360693	XS03G0223800/XS03G0232700/XS04G0070700/XS04G0172100/XS05G0076500/XS05G0143400/XS06G0077600/XS08G0183600/XS09G0155400/XS10G0152400/XS11G0136000/XS11G0195500/XS13G0159700/XS13G0252900/XS14G0113600/XS15G0173200	16
GO:0042168	heme metabolic process|BP	13/2857	45/17622	0.0231298	0.378597	0.360899	XS01G0223200/XS01G0349500/XS02G0266700/XS03G0091100/XS05G0090800/XS07G0295900/XS08G0087600/XS09G0063800/XS15G0008700/XS15G0115700/XSUnG0053100/XSUnG0119700/XSUnG0167300	13
GO:0010959	regulation of metal ion transport|BP	11/2857	36/17622	0.0235075	0.378597	0.360899	XS01G0239800/XS03G0003600/XS03G0107900/XS05G0256300/XS06G0013000/XS06G0154500/XS07G0277400/XS07G0278300/XS08G0112000/XS10G0052800/XS10G0053700	11
GO:0000502	proteasome complex|CC	17/2857	64/17622	0.0236526	0.378597	0.360899	XS01G0186700/XS02G0016000/XS02G0279100/XS03G0057900/XS03G0329700/XS06G0125200/XS07G0034100/XS07G0061700/XS08G0112000/XS09G0238400/XS10G0112300/XS10G0155500/XS11G0073500/XS12G0218300/XS13G0077900/XS13G0191300/XSUnG0145200	17
GO:0030662	coated vesicle membrane|CC	17/2857	64/17622	0.0236526	0.378597	0.360899	XS01G0409700/XS03G0223800/XS03G0232700/XS04G0172100/XS05G0076500/XS05G0143400/XS06G0077600/XS08G0183600/XS09G0155400/XS10G0152400/XS10G0183000/XS11G0136000/XS11G0195500/XS13G0159700/XS13G0252900/XS14G0113600/XS15G0173200	17
GO:1902749	regulation of cell cycle G2/M phase transition|BP	17/2857	64/17622	0.0236526	0.378597	0.360899	XS01G0112600/XS01G0375500/XS01G0376000/XS01G0386600/XS02G0078600/XS03G0263900/XS03G0267100/XS03G0325800/XS07G0045500/XS07G0092500/XS09G0072700/XS09G0201200/XS12G0035700/XS15G0112300/XSUnG0021000/XSUnG0180400/XSUnG0196800	17
GO:0009101	glycoprotein biosynthetic process|BP	41/2857	187/17622	0.0242751	0.378597	0.360899	XS01G0237900/XS01G0381700/XS02G0005500/XS03G0043600/XS03G0229800/XS03G0288200/XS03G0303800/XS04G0065500/XS04G0079700/XS04G0104100/XS04G0172100/XS04G0255600/XS04G0285300/XS05G0043800/XS05G0046900/XS06G0022200/XS06G0239900/XS06G0266200/XS07G0008200/XS08G0135200/XS08G0250300/XS09G0162400/XS11G0004700/XS11G0080700/XS11G0080800/XS11G0090100/XS12G0032400/XS12G0043400/XS12G0061400/XS13G0148500/XS14G0018…	41
GO:0032879	regulation of localization|BP	80/2857	400/17622	0.0244122	0.378597	0.360899	XS01G0000800/XS01G0010700/XS01G0091100/XS01G0163500/XS01G0239800/XS01G0381700/XS01G0409700/XS02G0004000/XS02G0080200/XS02G0145400/XS02G0184000/XS03G0003600/XS03G0107900/XS03G0125500/XS03G0126500/XS03G0132800/XS03G0228700/XS03G0260000/XS03G0274700/XS03G0309500/XS04G0070700/XS04G0172100/XS04G0198900/XS04G0199100/XS04G0229600/XS04G0239200/XS05G0000800/XS05G0119900/XS05G0256300/XS06G0013000/XS06G0154…	80
GO:0009956	radial pattern formation|BP	14/2857	50/17622	0.0246052	0.379676	0.361927	XS01G0346800/XS01G0346900/XS03G0023000/XS05G0189700/XS07G0093400/XS07G0196700/XS08G0242100/XS09G0085200/XS09G0227900/XS10G0163600/XS11G0229200/XS12G0071700/XS12G0249300/XS13G0037900	14
GO:0007127	meiosis I|BP	26/2857	109/17622	0.0246488	0.379676	0.361927	XS01G0260700/XS01G0364000/XS01G0372000/XS01G0384400/XS02G0055400/XS02G0112900/XS02G0135700/XS03G0214400/XS03G0325800/XS04G0198400/XS04G0229600/XS05G0007800/XS05G0107100/XS05G0148800/XS06G0059500/XS07G0261300/XS08G0140400/XS08G0140600/XS08G0250300/XS09G0183800/XS11G0045100/XS11G0118600/XS13G0059000/XS15G0000800/XSUnG0032800/XSUnG0109500	26
GO:0022836	gated channel activity|MF	24/2857	99/17622	0.0250139	0.383997	0.366046	XS02G0000100/XS02G0001500/XS02G0100100/XS03G0236200/XS03G0236800/XS04G0070700/XS06G0058600/XS06G0058800/XS06G0059100/XS06G0059200/XS06G0070000/XS06G0070100/XS06G0070200/XS06G0147000/XS06G0147300/XS09G0001100/XS11G0023100/XS13G0045300/XS15G0098900/XS15G0099200/XS15G0120500/XS15G0132800/XS15G0180500/XSUnG0214800	24
GO:0005102	signaling receptor binding|MF	39/2857	177/17622	0.0255245	0.390516	0.37226	XS01G0120300/XS01G0288500/XS01G0373000/XS01G0385400/XS01G0409700/XS02G0054800/XS02G0072400/XS02G0200600/XS02G0250700/XS03G0169000/XS03G0260000/XS03G0278100/XS03G0299800/XS04G0030200/XS04G0092400/XS04G0227900/XS05G0111400/XS05G0202400/XS06G0148700/XS06G0154500/XS06G0162600/XS06G0163200/XS06G0260200/XS07G0021400/XS07G0091300/XS08G0067800/XS08G0112000/XS08G0196000/XS08G0211000/XS10G0029300/XS10G0215…	39
GO:0060429	epithelium development|BP	28/2857	120/17622	0.0267256	0.404803	0.38588	XS01G0239800/XS03G0043600/XS04G0104100/XS04G0172100/XS05G0148800/XS06G0084400/XS06G0154500/XS06G0177800/XS06G0265200/XS07G0002900/XS07G0183300/XS10G0158600/XS11G0215800/XS12G0015700/XS12G0031100/XS12G0040700/XS12G0155400/XS13G0000300/XS13G0069800/XS13G0138600/XS13G0146900/XS14G0048000/XS14G0100100/XS15G0000800/XS15G0005800/XS15G0173200/XSUnG0011100/XSUnG0196800	28
GO:0140013	meiotic nuclear division|BP	40/2857	183/17622	0.0270186	0.407839	0.388774	XS01G0260700/XS01G0364000/XS01G0372000/XS01G0384400/XS02G0055400/XS02G0112900/XS02G0135700/XS03G0214400/XS03G0246400/XS03G0263900/XS03G0325800/XS04G0198400/XS04G0219600/XS04G0229600/XS05G0007800/XS05G0107100/XS05G0148800/XS06G0029600/XS06G0059500/XS06G0097000/XS07G0092500/XS07G0261300/XS08G0114800/XS08G0125200/XS08G0140400/XS08G0140600/XS08G0250300/XS09G0183800/XS11G0045100/XS11G0084300/XS11G0118…	40
GO:0016810	hydrolase activity, acting on carbon-nitrogen (but not peptide) bonds|MF	27/2857	115/17622	0.0271055	0.407839	0.388774	XS01G0238600/XS01G0313700/XS02G0003400/XS02G0078900/XS02G0139600/XS02G0139700/XS02G0141900/XS03G0022500/XS04G0027400/XS04G0027500/XS04G0113700/XS04G0217600/XS04G0258700/XS05G0016400/XS05G0129000/XS05G0164700/XS06G0265200/XS08G0083000/XS09G0126300/XS09G0126400/XS09G0212100/XS09G0226000/XS11G0078800/XS12G0117300/XS13G0000300/XS13G0005300/XS13G0035800	27
GO:0010564	regulation of cell cycle process|BP	48/2857	226/17622	0.0272591	0.408618	0.389516	XS01G0112600/XS01G0186700/XS01G0203900/XS01G0372000/XS01G0375500/XS01G0376000/XS01G0386600/XS02G0055400/XS02G0078600/XS02G0135700/XS02G0279100/XS03G0263900/XS03G0265200/XS03G0267100/XS03G0297400/XS03G0325800/XS04G0172100/XS04G0198900/XS04G0199100/XS04G0219600/XS05G0000800/XS05G0266100/XS07G0034100/XS07G0045500/XS07G0061700/XS07G0092500/XS08G0100500/XS08G0114800/XS09G0072700/XS09G0201200/XS11G0118…	48
GO:1905369	endopeptidase complex|CC	17/2857	65/17622	0.0273371	0.408618	0.389516	XS01G0186700/XS02G0016000/XS02G0279100/XS03G0057900/XS03G0329700/XS06G0125200/XS07G0034100/XS07G0061700/XS08G0112000/XS09G0238400/XS10G0112300/XS10G0155500/XS11G0073500/XS12G0218300/XS13G0077900/XS13G0191300/XSUnG0145200	17
GO:0016055	Wnt signaling pathway|BP	13/2857	46/17622	0.0275956	0.409786	0.390629	XS01G0186700/XS02G0279100/XS03G0092900/XS04G0104100/XS04G0192700/XS04G0229600/XS06G0265200/XS07G0034100/XS07G0061700/XS09G0183800/XS09G0231600/XS12G0035700/XS13G0077900	13
GO:0198738	cell-cell signaling by wnt|BP	13/2857	46/17622	0.0275956	0.409786	0.390629	XS01G0186700/XS02G0279100/XS03G0092900/XS04G0104100/XS04G0192700/XS04G0229600/XS06G0265200/XS07G0034100/XS07G0061700/XS09G0183800/XS09G0231600/XS12G0035700/XS13G0077900	13
GO:0009896	positive regulation of catabolic process|BP	25/2857	105/17622	0.0277546	0.410804	0.3916	XS02G0004000/XS02G0055400/XS03G0030200/XS03G0031500/XS03G0053500/XS03G0092900/XS03G0247000/XS03G0329700/XS04G0104100/XS04G0229600/XS05G0040200/XS06G0236700/XS07G0034100/XS07G0241000/XS08G0038700/XS08G0104900/XS08G0112000/XS09G0022100/XS09G0238400/XS13G0000300/XS13G0138600/XS13G0146900/XS13G0147100/XS15G0154100/XSUnG0155900	25
GO:0005261	cation channel activity|MF	21/2857	85/17622	0.0283662	0.416943	0.397452	XS02G0001500/XS03G0236200/XS03G0236800/XS04G0104100/XS06G0013000/XS06G0058600/XS06G0058800/XS06G0059100/XS06G0059200/XS06G0070000/XS06G0070100/XS06G0147000/XS06G0147300/XS09G0001100/XS10G0216900/XS15G0098900/XS15G0099200/XS15G0120500/XS15G0132800/XS15G0180500/XSUnG0214800	21
GO:0005798	Golgi-associated vesicle|CC	21/2857	85/17622	0.0283662	0.416943	0.397452	XS03G0223800/XS03G0232700/XS04G0070700/XS04G0104100/XS04G0172100/XS04G0285800/XS05G0001700/XS05G0076500/XS05G0143400/XS06G0077600/XS08G0081100/XS08G0183600/XS09G0155400/XS10G0152400/XS11G0136000/XS11G0195500/XS13G0095900/XS13G0159700/XS13G0252900/XS14G0113600/XS15G0173200	21
GO:0002252	immune effector process|BP	49/2857	232/17622	0.0284446	0.416943	0.397452	XS01G0170200/XS01G0330300/XS01G0354100/XS01G0354700/XS01G0354900/XS01G0372000/XS01G0378300/XS02G0001500/XS03G0264800/XS03G0278100/XS04G0077600/XS04G0104100/XS04G0189000/XS05G0018300/XS05G0040200/XS06G0029600/XS06G0032500/XS06G0058600/XS06G0058800/XS06G0059100/XS06G0059200/XS06G0070000/XS06G0070100/XS06G0154500/XS06G0194000/XS07G0005400/XS07G0061600/XS07G0078100/XS08G0024400/XS09G0241800/XS09G0242…	49
GO:0072331	signal transduction by p53 class mediator|BP	11/2857	37/17622	0.0286917	0.419213	0.399615	XS01G0186700/XS02G0279100/XS04G0227900/XS07G0034100/XS07G0061700/XS09G0229800/XS13G0069800/XS13G0077900/XS13G0147100/XS14G0044800/XSUnG0114100	11
GO:0050684	regulation of mRNA processing|BP	14/2857	51/17622	0.0290069	0.422459	0.40271	XS02G0045900/XS03G0202800/XS04G0154200/XS04G0227900/XS05G0040200/XS05G0243100/XS07G0143000/XS10G0063200/XS12G0037200/XS12G0155400/XS13G0146900/XS14G0048000/XS15G0169600/XSUnG0011100	14
GO:0005216	ion channel activity|MF	28/2857	121/17622	0.0295588	0.426456	0.40652	XS02G0000100/XS02G0001500/XS02G0100100/XS03G0001400/XS03G0236200/XS03G0236800/XS04G0070700/XS04G0104100/XS06G0013000/XS06G0058600/XS06G0058800/XS06G0059100/XS06G0059200/XS06G0070000/XS06G0070100/XS06G0070200/XS06G0147000/XS06G0147300/XS09G0001100/XS10G0216900/XS13G0013600/XS13G0045300/XS15G0098900/XS15G0099200/XS15G0120500/XS15G0132800/XS15G0180500/XSUnG0214800	28
GO:0008289	lipid binding|MF	62/2857	304/17622	0.0302716	0.426456	0.40652	XS01G0065400/XS01G0142700/XS01G0288500/XS01G0302800/XS01G0309000/XS01G0309400/XS01G0385400/XS01G0385600/XS01G0385900/XS01G0390500/XS01G0409700/XS02G0018800/XS02G0216500/XS02G0216700/XS03G0000100/XS03G0112700/XS03G0132800/XS03G0137700/XS03G0208300/XS03G0224400/XS03G0239200/XS03G0254500/XS04G0015100/XS04G0016300/XS04G0045800/XS04G0046000/XS04G0070700/XS04G0109300/XS04G0118700/XS04G0198900/XS04G0199…	62
GO:0061982	meiosis I cell cycle process|BP	26/2857	111/17622	0.0304908	0.426456	0.40652	XS01G0260700/XS01G0364000/XS01G0372000/XS01G0384400/XS02G0055400/XS02G0112900/XS02G0135700/XS03G0214400/XS03G0325800/XS04G0198400/XS04G0229600/XS05G0007800/XS05G0107100/XS05G0148800/XS06G0059500/XS07G0261300/XS08G0140400/XS08G0140600/XS08G0250300/XS09G0183800/XS11G0045100/XS11G0118600/XS13G0059000/XS15G0000800/XSUnG0032800/XSUnG0109500	26
GO:0070085	glycosylation|BP	44/2857	206/17622	0.0305748	0.426456	0.40652	XS01G0237900/XS01G0364400/XS01G0381700/XS02G0005500/XS03G0043600/XS03G0229800/XS03G0288200/XS03G0303800/XS04G0063800/XS04G0065500/XS04G0079700/XS04G0104100/XS04G0172100/XS04G0255600/XS04G0285300/XS05G0043800/XS05G0046900/XS06G0022200/XS06G0239900/XS06G0266200/XS07G0008200/XS08G0135200/XS08G0250300/XS09G0162400/XS11G0004700/XS11G0080700/XS11G0080800/XS11G0090100/XS12G0032400/XS12G0043400/XS12G0061…	44
GO:0015267	channel activity|MF	38/2857	174/17622	0.0308734	0.426456	0.40652	XS01G0369300/XS02G0000100/XS02G0001500/XS02G0100100/XS03G0001400/XS03G0236200/XS03G0236800/XS04G0070700/XS04G0104100/XS06G0013000/XS06G0034300/XS06G0036200/XS06G0058600/XS06G0058800/XS06G0059100/XS06G0059200/XS06G0070000/XS06G0070100/XS06G0070200/XS06G0147000/XS06G0147300/XS08G0001800/XS09G0001100/XS09G0002800/XS09G0003400/XS10G0136900/XS10G0162000/XS10G0216900/XS11G0023100/XS13G0013600/XS13G0045…	38
GO:0022803	passive transmembrane transporter activity|MF	38/2857	174/17622	0.0308734	0.426456	0.40652	XS01G0369300/XS02G0000100/XS02G0001500/XS02G0100100/XS03G0001400/XS03G0236200/XS03G0236800/XS04G0070700/XS04G0104100/XS06G0013000/XS06G0034300/XS06G0036200/XS06G0058600/XS06G0058800/XS06G0059100/XS06G0059200/XS06G0070000/XS06G0070100/XS06G0070200/XS06G0147000/XS06G0147300/XS08G0001800/XS09G0001100/XS09G0002800/XS09G0003400/XS10G0136900/XS10G0162000/XS10G0216900/XS11G0023100/XS13G0013600/XS13G0045…	38
GO:0030162	regulation of proteolysis|BP	24/2857	101/17622	0.0312687	0.426456	0.40652	XS02G0004000/XS02G0055400/XS03G0092900/XS03G0286900/XS03G0329700/XS04G0104100/XS04G0229600/XS05G0061900/XS05G0140700/XS07G0003000/XS07G0034100/XS07G0061700/XS08G0112000/XS08G0244400/XS09G0022100/XS09G0238400/XS10G0108900/XS10G0213700/XS11G0000300/XS11G0073500/XS12G0136900/XS13G0000300/XS13G0147100/XS14G0004000	24
GO:0008283	cell proliferation|BP	82/2857	416/17622	0.0315396	0.426456	0.40652	XS01G0127600/XS01G0263900/XS01G0300200/XS01G0364400/XS01G0375500/XS01G0376000/XS01G0409300/XS02G0067600/XS02G0078600/XS02G0108600/XS02G0200600/XS02G0217200/XS02G0222100/XS03G0132800/XS03G0228700/XS03G0247000/XS03G0263900/XS03G0265200/XS03G0299800/XS03G0325800/XS04G0029800/XS04G0104100/XS04G0134400/XS04G0189000/XS04G0192700/XS04G0263100/XS05G0046900/XS05G0127800/XS05G0148800/XS05G0192600/XS05G0223…	82
GO:0010948	negative regulation of cell cycle process|BP	22/2857	91/17622	0.0318192	0.426456	0.40652	XS01G0186700/XS01G0386600/XS02G0279100/XS03G0265200/XS03G0297400/XS03G0325800/XS04G0172100/XS04G0198900/XS04G0199100/XS07G0034100/XS07G0061700/XS08G0100500/XS09G0072700/XS13G0077900/XS13G0147100/XS14G0044800/XS14G0103500/XS15G0102400/XS15G0173200/XSUnG0067100/XSUnG0155900/XSUnG0195100	22
GO:0006081	cellular aldehyde metabolic process|BP	66/2857	327/17622	0.031924	0.426456	0.40652	XS01G0080500/XS01G0141700/XS01G0207600/XS01G0231800/XS01G0237300/XS01G0238600/XS01G0293200/XS01G0323000/XS01G0369000/XS02G0023500/XS02G0080200/XS02G0082300/XS02G0203600/XS02G0252100/XS03G0022500/XS03G0031100/XS03G0091100/XS03G0095200/XS03G0095300/XS03G0212000/XS03G0244100/XS04G0167000/XS04G0274600/XS05G0007900/XS05G0038100/XS05G0038200/XS05G0045700/XS05G0107100/XS06G0120400/XS06G0163200/XS07G0005…	66
GO:0052542	defense response by callose deposition|BP	20/2857	81/17622	0.0320413	0.426456	0.40652	XS01G0106400/XS01G0286700/XS03G0091100/XS03G0126700/XS03G0274700/XS03G0278100/XS05G0209700/XS06G0032500/XS07G0001000/XS07G0143300/XS08G0087600/XS09G0184400/XS09G0184700/XS10G0022600/XS12G0070800/XS13G0034800/XS13G0040000/XS14G0160900/XS15G0008700/XS15G0165600	20
GO:0018022	peptidyl-lysine methylation|BP	39/2857	180/17622	0.0325665	0.426456	0.40652	XS01G0000800/XS01G0112600/XS01G0266100/XS01G0375500/XS01G0376000/XS02G0055400/XS02G0288500/XS03G0132800/XS03G0202800/XS03G0266600/XS04G0029800/XS04G0151400/XS04G0227900/XS04G0263100/XS05G0038100/XS05G0038200/XS05G0148800/XS06G0059500/XS06G0163200/XS06G0182500/XS07G0078100/XS07G0092500/XS08G0125200/XS08G0245300/XS09G0137200/XS10G0013600/XS10G0061200/XS10G0061400/XS10G0070800/XS11G0084300/XS12G0055…	39
GO:0010155	regulation of proton transport|BP	13/2857	47/17622	0.0326599	0.426456	0.40652	XS02G0080200/XS03G0125500/XS03G0126500/XS03G0309500/XS07G0005100/XS08G0006000/XS08G0080700/XS08G0140400/XS08G0140600/XS10G0050600/XS10G0160400/XS10G0182300/XS12G0253000	13
GO:0030244	cellulose biosynthetic process|BP	25/2857	107/17622	0.034315	0.44172	0.421071	XS01G0221200/XS01G0288600/XS01G0363400/XS01G0364400/XS01G0398800/XS02G0290000/XS03G0053800/XS03G0259000/XS04G0063800/XS04G0167000/XS04G0289000/XS05G0040200/XS06G0131200/XS06G0263800/XS06G0263900/XS07G0008200/XS09G0212100/XS11G0072000/XS13G0135000/XS14G0033600/XS14G0074200/XS14G0107800/XS15G0009400/XSUnG0109500/XSUnG0214800	25
GO:0045727	positive regulation of translation|BP	11/2857	38/17622	0.0346462	0.444724	0.423934	XS01G0264000/XS02G0288000/XS03G0030200/XS03G0031500/XS05G0035500/XS06G0121100/XS08G0035700/XS09G0072700/XS09G0145800/XS11G0224700/XSUnG0196800	11
GO:0006470	protein dephosphorylation|BP	33/2857	149/17622	0.0350776	0.448428	0.427466	XS01G0080500/XS01G0170900/XS04G0028600/XS04G0227800/XS05G0065700/XS05G0119900/XS05G0246900/XS05G0266100/XS06G0013800/XS06G0051300/XS07G0005400/XS08G0024400/XS08G0100500/XS09G0093400/XS09G0208300/XS11G0158800/XS12G0022600/XS12G0250500/XS13G0013500/XS13G0015500/XS13G0015600/XS13G0032800/XS13G0047500/XS13G0051100/XS13G0096600/XS13G0185000/XS14G0004400/XS14G0047500/XS14G0106500/XSUnG0097000/XSUnG0100…	33
GO:0051259	protein complex oligomerization|BP	23/2857	97/17622	0.0352484	0.448428	0.427466	XS03G0251200/XS03G0267100/XS03G0325800/XS04G0092400/XS04G0114500/XS04G0198900/XS04G0199100/XS04G0225200/XS06G0121700/XS08G0235500/XS09G0208600/XS10G0128900/XS10G0129200/XS10G0215300/XS11G0011300/XS11G0073500/XS11G0090100/XS12G0035700/XS12G0060400/XS13G0080000/XS14G0100100/XS15G0180500/XSUnG0180400	23
GO:0000793	condensed chromosome|CC	16/2857	62/17622	0.0355563	0.448428	0.427466	XS01G0129800/XS01G0183100/XS02G0055400/XS03G0177700/XS03G0325800/XS04G0229600/XS05G0147000/XS08G0232400/XS09G0106200/XS09G0183800/XS11G0148700/XS13G0059000/XS15G0023600/XS15G0102400/XSUnG0109500/XSUnG0195100	16
GO:0009504	cell plate|CC	16/2857	62/17622	0.0355563	0.448428	0.427466	XS01G0363400/XS01G0401800/XS02G0055400/XS02G0290000/XS03G0223800/XS03G0337700/XS04G0134400/XS05G0032100/XS06G0263800/XS06G0263900/XS07G0293900/XS08G0091000/XS10G0023700/XS13G0131600/XS15G0112300/XSUnG0214800	16
GO:0000075	cell cycle checkpoint|BP	22/2857	92/17622	0.0356256	0.448428	0.427466	XS01G0186700/XS01G0375500/XS01G0376000/XS02G0279100/XS03G0265200/XS03G0325800/XS04G0154600/XS04G0219600/XS05G0148800/XS05G0243100/XS07G0034100/XS07G0061700/XS08G0080600/XS08G0100500/XS08G0124900/XS09G0106200/XS13G0077900/XS13G0147100/XS14G0044800/XS14G0103500/XSUnG0155900/XSUnG0195100	22
GO:0004197	cysteine-type endopeptidase activity|MF	22/2857	92/17622	0.0356256	0.448428	0.427466	XS02G0159800/XS02G0160400/XS02G0160500/XS02G0221800/XS02G0222300/XS02G0222400/XS02G0222600/XS02G0226300/XS03G0286900/XS05G0140700/XS06G0053000/XS06G0053200/XS06G0053300/XS07G0030100/XS08G0244400/XS10G0213700/XS11G0000300/XS12G0136900/XS13G0063200/XS13G0082700/XS14G0004000/XS14G0024800	22
GO:0035967	cellular response to topologically incorrect protein|BP	22/2857	92/17622	0.0356256	0.448428	0.427466	XS01G0296600/XS02G0013000/XS02G0200600/XS03G0091100/XS03G0157200/XS05G0050300/XS05G0209400/XS07G0001000/XS08G0087600/XS08G0104900/XS08G0168200/XS10G0004200/XS10G0116000/XS10G0215300/XS11G0074200/XS12G0071400/XS12G0097700/XS12G0203200/XS13G0000300/XS13G0147200/XS15G0008700/XSUnG0137600	22
GO:0051274	beta-glucan biosynthetic process|BP	28/2857	123/17622	0.0359078	0.44971	0.428687	XS01G0221200/XS01G0288600/XS01G0363400/XS01G0364400/XS01G0398800/XS02G0290000/XS03G0053800/XS03G0259000/XS04G0063800/XS04G0167000/XS04G0289000/XS05G0040200/XS06G0131200/XS06G0263800/XS06G0263900/XS07G0008200/XS09G0212100/XS10G0022600/XS10G0023700/XS11G0072000/XS13G0076200/XS13G0135000/XS14G0033600/XS14G0074200/XS14G0107800/XS15G0009400/XSUnG0109500/XSUnG0214800	28
GO:0061630	ubiquitin protein ligase activity|MF	21/2857	87/17622	0.0359253	0.44971	0.428687	XS01G0041200/XS01G0177800/XS01G0243200/XS02G0200600/XS04G0192000/XS04G0192700/XS04G0255400/XS05G0219300/XS07G0091300/XS08G0140800/XS09G0231600/XS10G0004200/XS12G0034700/XS12G0044000/XS13G0022600/XS13G0129600/XS13G0147100/XS13G0173900/XS15G0111900/XS15G0182300/XSUnG0137600	21
GO:0000209	protein polyubiquitination|BP	19/2857	77/17622	0.0362233	0.452194	0.431055	XS01G0177800/XS01G0186700/XS02G0200600/XS02G0279100/XS03G0090100/XS03G0265200/XS05G0219300/XS07G0034100/XS07G0061700/XS07G0108400/XS08G0140800/XS08G0168200/XS09G0176200/XS10G0004200/XS13G0000300/XS13G0077900/XS13G0129600/XS13G0173900/XSUnG0137600	19
GO:0051604	protein maturation|BP	27/2857	118/17622	0.0366296	0.456013	0.434696	XS01G0230000/XS01G0297900/XS01G0322800/XS01G0371900/XS02G0226300/XS03G0011300/XS03G0268300/XS04G0104100/XS05G0118000/XS05G0141800/XS06G0021200/XS07G0053400/XS09G0022100/XS09G0123600/XS10G0027900/XS10G0055000/XS10G0069700/XS10G0203400/XS11G0034300/XS12G0044800/XS12G0045600/XS12G0104400/XS13G0077900/XS13G0257100/XS14G0143000/XS14G0143200/XS15G0069800	27
GO:0016571	histone methylation|BP	44/2857	209/17622	0.038021	0.470261	0.448277	XS01G0000800/XS01G0112600/XS01G0266100/XS01G0275100/XS01G0375500/XS01G0376000/XS02G0055400/XS02G0135700/XS02G0288500/XS03G0132800/XS03G0202800/XS03G0266600/XS03G0330700/XS04G0029800/XS04G0151400/XS04G0227900/XS04G0263100/XS05G0148800/XS06G0059500/XS06G0163200/XS06G0182500/XS07G0078100/XS07G0092500/XS08G0125200/XS08G0245300/XS09G0137200/XS09G0162400/XS10G0013600/XS10G0061200/XS10G0061400/XS10G0070…	44
GO:0010388	NA	13/2857	48/17622	0.0383601	0.470261	0.448277	XS01G0275100/XS01G0308800/XS02G0055400/XS02G0135700/XS06G0059500/XS07G0045500/XS09G0162400/XS10G0069700/XS10G0112300/XS11G0220500/XS13G0077900/XS14G0085000/XS14G0143000	13
GO:0016278	lysine N-methyltransferase activity|MF	13/2857	48/17622	0.0383601	0.470261	0.448277	XS01G0266100/XS01G0364000/XS03G0011500/XS03G0132800/XS04G0151400/XS05G0038100/XS05G0038200/XS07G0166700/XS10G0091700/XS11G0004000/XS11G0004200/XS14G0113600/XS15G0023600	13
GO:0016279	protein-lysine N-methyltransferase activity|MF	13/2857	48/17622	0.0383601	0.470261	0.448277	XS01G0266100/XS01G0364000/XS03G0011500/XS03G0132800/XS04G0151400/XS05G0038100/XS05G0038200/XS07G0166700/XS10G0091700/XS11G0004000/XS11G0004200/XS14G0113600/XS15G0023600	13
GO:1905114	cell surface receptor signaling pathway involved in cell-cell signaling|BP	13/2857	48/17622	0.0383601	0.470261	0.448277	XS01G0186700/XS02G0279100/XS03G0092900/XS04G0104100/XS04G0192700/XS04G0229600/XS06G0265200/XS07G0034100/XS07G0061700/XS09G0183800/XS09G0231600/XS12G0035700/XS13G0077900	13
GO:0080135	regulation of cellular response to stress|BP	43/2857	204/17622	0.0391814	0.474774	0.45258	XS01G0027800/XS02G0004000/XS03G0091100/XS03G0267100/XS03G0278100/XS03G0325800/XS04G0167000/XS04G0229600/XS04G0257200/XS05G0061900/XS06G0013800/XS06G0032500/XS06G0247800/XS07G0006900/XS07G0036100/XS07G0192200/XS07G0213000/XS07G0246300/XS08G0024400/XS08G0087600/XS08G0100500/XS08G0104900/XS08G0112000/XS08G0124900/XS09G0120800/XS09G0183800/XS09G0229800/XS10G0116000/XS10G0160400/XS10G0215300/XS12G0071…	43
GO:0022838	substrate-specific channel activity|MF	35/2857	161/17622	0.0393398	0.475425	0.4532	XS02G0000100/XS02G0001500/XS02G0100100/XS03G0001400/XS03G0236200/XS03G0236800/XS04G0070700/XS04G0104100/XS06G0013000/XS06G0034300/XS06G0036200/XS06G0058600/XS06G0058800/XS06G0059100/XS06G0059200/XS06G0070000/XS06G0070100/XS06G0070200/XS06G0147000/XS06G0147300/XS08G0001800/XS09G0001100/XS09G0002800/XS10G0136900/XS10G0162000/XS10G0216900/XS13G0013600/XS13G0045300/XS14G0165200/XS15G0098900/XS15G0099…	35
GO:0035266	meristem growth|BP	31/2857	140/17622	0.0401912	0.481961	0.45943	XS01G0069800/XS01G0120300/XS01G0224800/XS01G0263600/XS01G0296900/XS02G0078600/XS02G0250700/XS03G0227100/XS03G0244100/XS03G0274700/XS03G0278100/XS04G0118700/XS04G0253500/XS05G0253400/XS06G0064300/XS06G0148700/XS06G0199600/XS06G0260200/XS07G0162900/XS07G0244200/XS08G0033600/XS10G0158600/XS11G0047200/XS11G0071600/XS11G0071700/XS12G0031100/XS12G0070800/XS13G0052300/XS14G0112100/XS15G0102400/XSUnG0025…	31
GO:0000023	maltose metabolic process|BP	21/2857	88/17622	0.0402208	0.481961	0.45943	XS01G0230600/XS01G0241100/XS01G0358500/XS01G0369000/XS03G0244100/XS05G0038100/XS05G0038200/XS05G0246900/XS05G0248700/XS05G0266700/XS05G0267200/XS07G0116700/XS08G0033300/XS10G0052600/XS12G0222600/XS13G0051100/XS13G0106100/XS14G0011500/XS15G0026300/XS15G0053500/XS15G0143600	21
GO:0070008	serine-type exopeptidase activity|MF	15/2857	58/17622	0.0402601	0.481961	0.45943	XS05G0003900/XS05G0142700/XS05G0263800/XS05G0264200/XS05G0265900/XS05G0267800/XS06G0126500/XS07G0090500/XS07G0090600/XS07G0090700/XS07G0212700/XS12G0017300/XS12G0116400/XSUnG0014700/XSUnG0053000	15
GO:0098687	chromosomal region|CC	27/2857	119/17622	0.0403048	0.481961	0.45943	XS01G0129800/XS01G0183100/XS01G0275100/XS01G0383500/XS02G0055400/XS02G0205300/XS02G0206700/XS04G0104100/XS04G0151400/XS04G0189000/XS04G0229600/XS05G0119900/XS08G0080600/XS08G0085700/XS08G0124900/XS09G0183800/XS10G0091700/XS10G0194800/XS11G0004000/XS11G0004200/XS12G0040700/XS13G0013500/XS13G0018800/XS13G0022600/XS13G0069800/XS15G0023600/XSUnG0195100	27
GO:0009968	negative regulation of signal transduction|BP	46/2857	221/17622	0.0410855	0.490007	0.4671	XS01G0000800/XS01G0186700/XS01G0285500/XS01G0308800/XS02G0004000/XS02G0200600/XS02G0279100/XS03G0092900/XS03G0224400/XS03G0299800/XS04G0104100/XS04G0156500/XS04G0192700/XS04G0202900/XS04G0255400/XS05G0119900/XS05G0243100/XS06G0084400/XS06G0154500/XS06G0265200/XS07G0009500/XS07G0028400/XS07G0034100/XS07G0061700/XS07G0063500/XS08G0100500/XS08G0112000/XS08G0139800/XS09G0001900/XS09G0229800/XS09G0231…	46
GO:0006457	protein folding|BP	56/2857	276/17622	0.0412612	0.490814	0.46787	XS01G0004200/XS01G0006200/XS01G0296600/XS01G0301800/XS02G0022200/XS02G0051500/XS02G0071500/XS02G0149200/XS02G0279900/XS03G0031100/XS03G0031200/XS03G0148600/XS03G0172100/XS03G0260000/XS03G0292200/XS03G0294700/XS03G0335300/XS03G0335400/XS04G0001900/XS04G0019300/XS04G0019500/XS04G0121500/XS04G0123300/XS04G0157300/XS04G0220300/XS04G0263500/XS05G0046900/XS05G0061900/XS05G0069900/XS05G0108600/XS06G0162…	56
GO:0051651	maintenance of location in cell|BP	11/2857	39/17622	0.0414194	0.490934	0.467984	XS01G0051000/XS03G0053800/XS04G0134400/XS08G0091000/XS08G0123800/XS10G0081100/XS10G0152400/XS11G0229200/XS12G0249300/XS13G0037900/XS15G0017400	11
GO:0008757	S-adenosylmethionine-dependent methyltransferase activity|MF	41/2857	194/17622	0.0416066	0.490934	0.467984	XS01G0171400/XS01G0218100/XS01G0266100/XS01G0306800/XS01G0342900/XS01G0343300/XS01G0364000/XS02G0288500/XS03G0011500/XS03G0084900/XS03G0132800/XS03G0227700/XS03G0231400/XS04G0055900/XS04G0095700/XS04G0151400/XS04G0238700/XS04G0288600/XS05G0038100/XS05G0038200/XS05G0041400/XS05G0209800/XS06G0265700/XS07G0036100/XS07G0166700/XS08G0124800/XS10G0013600/XS10G0066800/XS10G0091700/XS11G0004000/XS11G0004…	41
GO:0009100	glycoprotein metabolic process|BP	43/2857	205/17622	0.042053	0.491231	0.468267	XS01G0209100/XS01G0237900/XS01G0381700/XS02G0005500/XS03G0043600/XS03G0229800/XS03G0288200/XS03G0303800/XS04G0065500/XS04G0079700/XS04G0104100/XS04G0172100/XS04G0255600/XS04G0285300/XS05G0043800/XS05G0046900/XS06G0022200/XS06G0239900/XS06G0266200/XS07G0008200/XS08G0126900/XS08G0135200/XS08G0250300/XS09G0162400/XS11G0004700/XS11G0080700/XS11G0080800/XS11G0090100/XS12G0032400/XS12G0043400/XS12G0061…	43
GO:0032940	secretion by cell|BP	29/2857	130/17622	0.0422156	0.491866	0.468872	XS01G0003900/XS01G0163500/XS01G0323900/XS02G0018800/XS02G0217200/XS02G0222100/XS03G0232400/XS03G0260000/XS04G0104100/XS04G0134400/XS04G0198900/XS04G0199100/XS05G0192600/XS06G0154500/XS07G0019700/XS07G0053200/XS07G0213000/XS08G0091000/XS09G0236400/XS10G0183000/XS10G0202600/XS11G0068600/XS12G0012400/XS12G0020700/XS14G0100100/XS14G0175000/XS15G0154100/XS15G0173200/XSUnG0134600	29
GO:0010648	negative regulation of cell communication|BP	47/2857	227/17622	0.0425891	0.493686	0.470607	XS01G0000800/XS01G0186700/XS01G0285500/XS01G0308800/XS02G0004000/XS02G0200600/XS02G0279100/XS03G0092900/XS03G0224400/XS03G0299800/XS04G0104100/XS04G0156500/XS04G0192700/XS04G0202900/XS04G0255400/XS05G0119900/XS05G0243100/XS06G0084400/XS06G0154500/XS06G0177800/XS06G0265200/XS07G0009500/XS07G0028400/XS07G0034100/XS07G0061700/XS07G0063500/XS08G0100500/XS08G0112000/XS08G0139800/XS09G0001900/XS09G0229…	47
GO:0023057	negative regulation of signaling|BP	47/2857	227/17622	0.0425891	0.493686	0.470607	XS01G0000800/XS01G0186700/XS01G0285500/XS01G0308800/XS02G0004000/XS02G0200600/XS02G0279100/XS03G0092900/XS03G0224400/XS03G0299800/XS04G0104100/XS04G0156500/XS04G0192700/XS04G0202900/XS04G0255400/XS05G0119900/XS05G0243100/XS06G0084400/XS06G0154500/XS06G0177800/XS06G0265200/XS07G0009500/XS07G0028400/XS07G0034100/XS07G0061700/XS07G0063500/XS08G0100500/XS08G0112000/XS08G0139800/XS09G0001900/XS09G0229…	47
GO:0006779	porphyrin-containing compound biosynthetic process|BP	28/2857	125/17622	0.0432325	0.497497	0.474241	XS01G0223200/XS01G0349500/XS01G0403900/XS02G0080200/XS02G0266700/XS03G0091100/XS03G0213800/XS05G0090800/XS05G0253400/XS06G0057900/XS07G0005100/XS07G0246300/XS07G0295900/XS08G0087600/XS09G0063800/XS10G0027900/XS10G0160400/XS11G0047200/XS13G0242200/XS13G0259700/XS13G0260000/XS15G0008700/XS15G0115700/XS15G0121400/XS15G0179600/XSUnG0053100/XSUnG0119700/XSUnG0167300	28
GO:0046873	metal ion transmembrane transporter activity|MF	46/2857	222/17622	0.0439409	0.504211	0.48064	XS02G0001500/XS02G0017700/XS02G0218900/XS03G0236200/XS03G0236800/XS03G0331700/XS04G0007200/XS04G0104100/XS05G0195800/XS06G0008100/XS06G0013000/XS06G0058600/XS06G0058800/XS06G0059100/XS06G0059200/XS06G0070000/XS06G0070100/XS06G0147000/XS06G0147300/XS06G0207100/XS06G0235700/XS07G0253300/XS09G0001100/XS09G0062000/XS09G0184400/XS09G0184700/XS10G0020700/XS10G0124200/XS10G0216900/XS12G0054100/XS12G0164…	46
GO:0061013	regulation of mRNA catabolic process|BP	13/2857	49/17622	0.0447304	0.508137	0.484383	XS01G0198500/XS02G0023500/XS03G0030200/XS03G0031500/XS03G0247000/XS07G0002900/XS07G0240200/XS10G0092300/XS12G0035600/XS12G0192600/XS13G0138600/XS14G0044800/XSUnG0107000	13
GO:0061659	ubiquitin-like protein ligase activity|MF	21/2857	89/17622	0.0448806	0.508572	0.484797	XS01G0041200/XS01G0177800/XS01G0243200/XS02G0200600/XS04G0192000/XS04G0192700/XS04G0255400/XS05G0219300/XS07G0091300/XS08G0140800/XS09G0231600/XS10G0004200/XS12G0034700/XS12G0044000/XS13G0022600/XS13G0129600/XS13G0147100/XS13G0173900/XS15G0111900/XS15G0182300/XSUnG0137600	21
GO:0006399	tRNA metabolic process|BP	43/2857	206/17622	0.045081	0.508792	0.485008	XS01G0231800/XS01G0260700/XS02G0046000/XS02G0252100/XS02G0264300/XS03G0020000/XS03G0031100/XS03G0224600/XS03G0231400/XS03G0252000/XS03G0277200/XS03G0279600/XS04G0001900/XS04G0113700/XS04G0221000/XS04G0229600/XS04G0266800/XS04G0274600/XS04G0288600/XS05G0016400/XS05G0067500/XS05G0084000/XS05G0084400/XS06G0002800/XS07G0262800/XS08G0074500/XS08G0140600/XS09G0183800/XS11G0023100/XS11G0025700/XS11G0076…	43
GO:0005764	lysosome|CC	26/2857	115/17622	0.0452546	0.508792	0.485008	XS01G0163500/XS01G0209100/XS01G0302800/XS01G0381700/XS02G0221800/XS02G0222300/XS02G0222400/XS02G0222600/XS03G0003600/XS04G0104100/XS04G0239200/XS05G0192600/XS06G0053000/XS06G0053200/XS06G0053300/XS07G0030100/XS08G0123800/XS08G0126900/XS10G0152400/XS12G0116400/XS13G0082700/XS13G0159700/XS13G0256900/XS14G0024800/XSUnG0014700/XSUnG0200700	26
GO:0019941	modification-dependent protein catabolic process|BP	62/2857	311/17622	0.0454838	0.508792	0.485008	XS01G0041200/XS01G0186700/XS01G0243200/XS01G0305500/XS01G0322800/XS01G0335200/XS02G0004000/XS02G0016000/XS02G0055400/XS02G0200600/XS02G0279100/XS03G0092900/XS03G0147400/XS03G0177700/XS03G0265200/XS03G0286900/XS03G0329700/XS04G0104100/XS04G0192700/XS04G0229600/XS05G0110600/XS05G0140700/XS06G0008900/XS06G0084400/XS06G0125200/XS07G0003000/XS07G0034100/XS07G0052100/XS07G0061700/XS07G0079400/XS08G0112…	62
GO:0005769	early endosome|CC	14/2857	54/17622	0.0456383	0.508792	0.485008	XS01G0163500/XS01G0363400/XS02G0290000/XS03G0023000/XS03G0331700/XS04G0239200/XS06G0039600/XS06G0263800/XS06G0263900/XS07G0253300/XS08G0123800/XS13G0095900/XS14G0175000/XSUnG0150400	14
GO:1900055	regulation of leaf senescence|BP	14/2857	54/17622	0.0456383	0.508792	0.485008	XS01G0024400/XS01G0065400/XS01G0340300/XS01G0403900/XS01G0405900/XS03G0239200/XS05G0127800/XS06G0114600/XS09G0144900/XS12G0087400/XS12G0254900/XS12G0256400/XS13G0057700/XS14G0087000	14
GO:0009627	systemic acquired resistance|BP	44/2857	212/17622	0.0467798	0.513447	0.489445	XS02G0117400/XS02G0117700/XS02G0118300/XS02G0197600/XS03G0301400/XS04G0112000/XS04G0167000/XS04G0204500/XS04G0217600/XS05G0009000/XS05G0256400/XS05G0260500/XS06G0013800/XS06G0032500/XS06G0059500/XS07G0063500/XS07G0246300/XS08G0024400/XS08G0030400/XS09G0072700/XS09G0184400/XS09G0184700/XS09G0241800/XS09G0242300/XS10G0116000/XS10G0160400/XS10G0212600/XS10G0215300/XS11G0090600/XS11G0180500/XS12G0071…	44
GO:0019682	glyceraldehyde-3-phosphate metabolic process|BP	44/2857	212/17622	0.0467798	0.513447	0.489445	XS01G0080500/XS01G0141700/XS01G0207600/XS01G0231800/XS01G0238600/XS01G0293200/XS01G0323000/XS01G0369000/XS02G0023500/XS02G0080200/XS03G0031100/XS03G0095200/XS03G0095300/XS03G0212000/XS03G0244100/XS04G0167000/XS04G0274600/XS05G0007900/XS05G0038100/XS05G0038200/XS05G0045700/XS07G0005100/XS07G0246300/XS07G0262800/XS08G0034200/XS09G0178100/XS10G0027900/XS10G0160400/XS11G0150600/XS12G0087800/XS12G0109…	44
GO:0061647	histone H3-K9 modification|BP	28/2857	126/17622	0.047284	0.516192	0.492061	XS01G0000800/XS01G0112600/XS01G0375500/XS01G0376000/XS02G0055400/XS02G0288500/XS03G0132800/XS03G0266600/XS04G0029800/XS04G0151400/XS04G0263100/XS05G0148800/XS06G0059500/XS06G0163200/XS06G0182500/XS07G0078100/XS07G0092500/XS08G0125200/XS08G0245300/XS09G0137200/XS10G0013600/XS10G0070800/XS11G0084300/XS12G0055200/XS15G0112300/XS15G0169600/XS15G0171700/XSUnG0106400	28
GO:0030133	transport vesicle|CC	23/2857	100/17622	0.0481658	0.516192	0.492061	XS01G0003900/XS01G0279800/XS01G0336700/XS01G0409700/XS03G0223800/XS04G0160800/XS04G0172100/XS05G0001700/XS05G0076500/XS05G0143400/XS06G0077600/XS06G0082800/XS07G0045500/XS07G0183300/XS10G0152400/XS10G0183000/XS11G0136000/XS11G0195500/XS13G0159700/XS13G0217800/XS13G0252900/XS14G0113600/XS15G0173200	23
GO:0043687	post-translational protein modification|BP	27/2857	121/17622	0.0484662	0.51738	0.493194	XS01G0046100/XS01G0275100/XS01G0372000/XS02G0005500/XS02G0135700/XS03G0095100/XS03G0325800/XS04G0157300/XS04G0172100/XS04G0198400/XS06G0022200/XS06G0059500/XS06G0239900/XS07G0008200/XS07G0220300/XS08G0024400/XS08G0243500/XS09G0228100/XS10G0030400/XS10G0081100/XS11G0004700/XS11G0090100/XS11G0157200/XS14G0031500/XS15G0000800/XS15G0088500/XS15G0173200	27
GO:0010498	proteasomal protein catabolic process|BP	49/2857	240/17622	0.0485044	0.51738	0.493194	XS01G0041200/XS01G0186700/XS01G0305500/XS02G0004000/XS02G0016000/XS02G0055400/XS02G0200600/XS02G0279100/XS03G0092900/XS03G0147400/XS03G0265200/XS03G0286900/XS03G0329700/XS04G0104100/XS04G0192700/XS04G0225200/XS04G0229600/XS05G0140700/XS06G0008900/XS06G0125200/XS07G0003000/XS07G0034100/XS07G0061700/XS07G0079400/XS08G0112000/XS08G0140800/XS08G0168200/XS08G0244400/XS09G0183800/XS09G0231600/XS09G0238…	49
GO:0018208	peptidyl-proline modification|BP	11/2857	40/17622	0.0490538	0.519581	0.495292	XS01G0301800/XS02G0022200/XS02G0149200/XS03G0260000/XS03G0292200/XS07G0134100/XS08G0011200/XS10G0212900/XS11G0224100/XS14G0176500/XSUnG0033200	11
GO:0019882	antigen processing and presentation|BP	11/2857	40/17622	0.0490538	0.519581	0.495292	XS01G0003900/XS01G0032100/XS01G0186700/XS02G0279100/XS04G0172100/XS04G0236600/XS07G0034100/XS07G0061700/XS13G0077900/XS13G0159700/XS15G0173200	11
GO:0032204	regulation of telomere maintenance|BP	11/2857	40/17622	0.0490538	0.519581	0.495292	XS01G0383500/XS01G0384400/XS02G0135700/XS04G0189000/XS04G0198400/XS06G0059500/XS08G0250300/XS10G0069700/XS13G0059000/XS13G0069800/XS13G0175000	11

## Sheet: Supplementary Table 6
Supplementary Table 6. Data (node pairs and PCC values) for regenerating the TO-GCN subnetwork related to fatty acid biosynthesis in fruit.
Source geneID	Target geneID	PCC
XS01G0336800	XS01G0332300	0.800451
XS01G0336800	XS07G0051900	0.833134
XS01G0336800	XS03G0026700	0.887784
XS01G0336800	XS08G0006700	0.847164
XS01G0336800	XS03G0323300	0.902108
XS01G0336800	XS10G0140100	0.819881
XS01G0336800	XS12G0072400	0.831624
XS01G0336800	XS09G0185100	0.900808
XS01G0336800	XS07G0251500	0.880127
XS01G0336800	XS13G0248000	0.831714
XS01G0336800	XS13G0120200	0.898025
XS01G0336800	XS02G0073500	0.882948
XS01G0336800	XSUnG0225500	0.900519
XS01G0336800	XS05G0035700	0.883272
XS01G0336800	XS13G0135300	0.908015
XS01G0336800	XS09G0230700	0.808434
XS01G0336800	XS03G0176700	0.950885
XS01G0336800	XS11G0214400	0.808295
XS01G0336800	XS02G0103900	0.882531
XS01G0336800	XS07G0040000	0.815551
XS01G0336800	XS13G0009700	0.875804
XS01G0336800	XS06G0006700	0.955941
XS01G0336800	XS08G0203300	0.858495
XS01G0336800	XS05G0153200	0.854591
XS01G0336800	XS12G0232600	0.836603
XS01G0336800	XS07G0094600	0.815967
XS01G0336800	XS03G0161600	0.91875
XS01G0336800	XS03G0318400	0.864348
XS01G0336800	XS12G0072300	0.802765
XS01G0336800	XS07G0024600	0.946309
XS01G0336800	XS08G0019100	0.829153
XS01G0336800	XS13G0120800	0.870998
XS01G0336800	XS06G0048100	0.840487
XS01G0336800	XS02G0029200	0.807644
XS01G0336800	XSUnG0221700	0.900398
XS01G0336800	XS14G0106200	0.813628
XS01G0336800	XS04G0079800	0.868609
XS01G0336800	XS07G0243200	0.905044
XS01G0336800	XS07G0261900	0.845385
XS01G0336800	XS06G0063900	0.824237
XS01G0336800	XS10G0093600	0.942033
XS01G0336800	XS09G0218100	0.889258
XS01G0336800	XS12G0166900	0.892885
XS01G0336800	XS06G0078700	0.811783
XS01G0336800	XS05G0020000	0.86305
XS01G0336800	XS06G0051600	0.80635
XS01G0336800	XS01G0315800	0.822766
XS01G0336800	XS01G0152900	0.885988
XS01G0336800	XS13G0066000	0.902885
XS01G0336800	XS13G0141400	0.85399
XS01G0336800	XS06G0147900	0.814415
XS01G0336800	XS12G0045100	0.861154
XS01G0336800	XS08G0146400	0.889543
XS01G0336800	XS07G0072300	0.857705
XS01G0336800	XS14G0040600	0.92873
XS01G0336800	XS14G0021600	0.831694
XS01G0336800	XS06G0002500	0.892207
XS01G0336800	XS08G0200900	0.90858
XS01G0336800	XS10G0090900	0.919347
XS01G0336800	XS12G0125600	0.848094
XS01G0336800	XS06G0005000	0.82062
XS01G0336800	XS01G0295400	0.94992
XS01G0336800	XSUnG0067800	0.86391
XS01G0336800	XS06G0151800	0.854621
XS01G0336800	XS12G0116200	0.808885
XS01G0336800	XS11G0198200	0.832128
XS01G0336800	XSUnG0149500	0.908593
XS01G0336800	XS05G0021800	0.871079
XS01G0336800	XS05G0130400	0.845118
XS01G0336800	XS09G0022000	0.932879
XS01G0336800	XS01G0356200	0.885072
XS01G0336800	XS06G0084600	0.805823
XS01G0336800	XS04G0004100	0.924586
XS01G0336800	XS07G0027700	0.875646
XS01G0336800	XS13G0120300	0.815097
XS01G0336800	XS14G0092800	0.853356
XS01G0336800	XS07G0129900	0.800559
XS01G0336800	XS03G0186900	0.863118
XS01G0336800	XS05G0050200	0.860961
XS01G0336800	XS03G0147200	0.819747
XS01G0336800	XS08G0166300	0.826202
XS01G0336800	XS13G0062600	0.874561
XS01G0336800	XS01G0305100	0.82775
XS01G0336800	XS14G0002500	0.874631
XS01G0336800	XS13G0176400	0.856366
XS01G0336800	XS11G0010500	0.900177
XS01G0336800	XS07G0001400	0.859347
XS01G0336800	XS08G0215600	0.90649
XS01G0336800	XS12G0236800	0.803135
XS01G0336800	XS03G0019600	0.971638
XS01G0336800	XS04G0165000	0.922513
XS01G0336800	XS10G0120300	0.807184
XS01G0336800	XS11G0188400	0.870829
XS01G0336800	XS04G0151900	0.837412
XS01G0336800	XS04G0234100	0.903469
XS01G0336800	XSUnG0107300	0.924844
XS01G0336800	XS05G0104700	0.812775
XS01G0336800	XS05G0164600	0.888302
XS01G0336800	XS05G0258700	0.837209
XS01G0336800	XS14G0069300	0.911517
XS01G0336800	XS01G0363100	0.816921
XS01G0336800	XS07G0222000	0.836979
XS01G0336800	XS06G0122800	0.869715
XS01G0336800	XS01G0122700	0.850736
XS01G0336800	XS10G0122100	0.868677
XS01G0336800	XS06G0148800	0.84373
XS01G0336800	XS09G0023500	0.878682
XS01G0336800	XS08G0226600	0.943842
XS01G0336800	XS06G0039700	0.803404
XS01G0336800	XS01G0275200	0.919539
XS01G0336800	XS06G0064900	0.894963
XS01G0336800	XSUnG0143000	0.975789
XS01G0336800	XS01G0228100	0.81767
XS01G0336800	XS11G0179800	0.870103
XS01G0336800	XS09G0218500	0.833706
XS01G0336800	XS01G0383000	0.831537
XS01G0336800	XS06G0094800	0.862334
XS01G0336800	XS14G0007700	0.834547
XS01G0336800	XS05G0049800	0.932964
XS01G0336800	XSUnG0053700	0.947578
XS01G0336800	XS10G0030700	0.813509
XS01G0336800	XS14G0021500	0.907642
XS01G0336800	XS10G0037400	0.832815
XS01G0336800	XSUnG0229600	0.9271
XS01G0336800	XS13G0011400	0.814126
XS01G0336800	XS01G0378400	0.920675
XS01G0336800	XS14G0126900	0.816563
XS01G0336800	XS07G0196100	0.835804
XS01G0336800	XS11G0117600	0.801848
XS01G0336800	XS11G0052500	0.834855
XS01G0336800	XS01G0384000	0.91673
XS01G0336800	XS13G0120700	0.858094
XS01G0332300	XS07G0051900	0.809118
XS01G0332300	XS03G0323300	0.927099
XS01G0332300	XS05G0045100	0.850183
XS01G0332300	XS10G0140100	0.812497
XS01G0332300	XS12G0072400	0.903311
XS01G0332300	XS09G0185100	0.821244
XS01G0332300	XS13G0248000	0.861085
XS01G0332300	XS13G0120200	0.838473
XS01G0332300	XS02G0073500	0.82724
XS01G0332300	XS01G0380300	0.885469
XS01G0332300	XS09G0230700	0.898245
XS01G0332300	XS13G0163900	0.845862
XS01G0332300	XS02G0103900	0.870281
XS01G0332300	XS08G0203300	0.904686
XS01G0332300	XS07G0094600	0.875727
XS01G0332300	XS03G0161600	0.868874
XS01G0332300	XS12G0072300	0.874252
XS01G0332300	XS08G0019100	0.829626
XS01G0332300	XS06G0048100	0.822567
XS01G0332300	XSUnG0221700	0.801321
XS01G0332300	XS04G0079800	0.865142
XS01G0332300	XS10G0093600	0.822013
XS01G0332300	XS06G0051600	0.82668
XS01G0332300	XS01G0283000	0.886549
XS01G0332300	XS11G0198400	0.84075
XS01G0332300	XS11G0215200	0.810657
XS01G0332300	XS12G0125600	0.837154
XS01G0332300	XS01G0358600	0.848251
XS01G0332300	XS06G0005000	0.878554
XS01G0332300	XS12G0116200	0.880089
XS01G0332300	XS03G0231300	0.848578
XS01G0332300	XS05G0130400	0.851297
XS01G0332300	XS01G0356200	0.875712
XS01G0332300	XS04G0004100	0.809163
XS01G0332300	XS13G0120300	0.828455
XS01G0332300	XS14G0092800	0.874142
XS01G0332300	XS05G0253700	0.863681
XS01G0332300	XS05G0050200	0.839837
XS01G0332300	XS03G0147200	0.858359
XS01G0332300	XS13G0062600	0.848167
XS01G0332300	XS14G0002500	0.849407
XS01G0332300	XS11G0010500	0.843135
XS01G0332300	XS07G0001400	0.800449
XS01G0332300	XS12G0236800	0.821434
XS01G0332300	XS06G0059900	0.868679
XS01G0332300	XS04G0234100	0.863092
XS01G0332300	XS05G0258700	0.899387
XS01G0332300	XS14G0069300	0.848867
XS01G0332300	XS06G0122800	0.87641
XS01G0332300	XSUnG0143000	0.82288
XS01G0332300	XS01G0228100	0.856931
XS01G0332300	XS11G0179800	0.90104
XS01G0332300	XS09G0218500	0.856652
XS01G0332300	XS01G0383000	0.802116
XS01G0332300	XS06G0094800	0.806347
XS01G0332300	XS14G0007700	0.836563
XS01G0332300	XS05G0049800	0.935508
XS01G0332300	XS05G0040600	0.811692
XS01G0332300	XS13G0011400	0.904222
XS01G0332300	XS11G0081600	0.892706
XS01G0332300	XS07G0196100	0.88335
XS01G0332300	XS01G0384000	0.876224
XS03G0026700	XS10G0140100	0.802287
XS03G0026700	XS03G0201900	0.866518
XS03G0026700	XS09G0185100	0.825048
XS03G0026700	XS07G0251500	0.839269
XS03G0026700	XS13G0248000	0.845546
XS03G0026700	XS02G0073500	0.912415
XS03G0026700	XSUnG0225500	0.836495
XS03G0026700	XS05G0035700	0.92194
XS03G0026700	XSUnG0020700	0.881885
XS03G0026700	XS07G0262200	0.930915
XS03G0026700	XS03G0176700	0.816984
XS03G0026700	XS13G0163900	0.810622
XS03G0026700	XS07G0040000	0.814744
XS03G0026700	XS08G0046300	0.855299
XS03G0026700	XS06G0006700	0.94822
XS03G0026700	XS10G0177600	0.817141
XS03G0026700	XS05G0153200	0.838409
XS03G0026700	XS03G0161600	0.841043
XS03G0026700	XS07G0033800	0.947765
XS03G0026700	XS02G0157400	0.860802
XS03G0026700	XS06G0165000	0.877079
XS03G0026700	XS04G0133900	0.879638
XS03G0026700	XS03G0318400	0.851132
XS03G0026700	XS07G0024600	0.873404
XS03G0026700	XS03G0219200	0.94239
XS03G0026700	XS08G0019100	0.872371
XS03G0026700	XS13G0120800	0.865963
XS03G0026700	XS06G0048100	0.867162
XS03G0026700	XS02G0029200	0.94622
XS03G0026700	XSUnG0221700	0.927337
XS03G0026700	XS14G0106200	0.883798
XS03G0026700	XS04G0079800	0.805279
XS03G0026700	XS07G0243200	0.854316
XS03G0026700	XS07G0261900	0.906776
XS03G0026700	XS06G0063900	0.804539
XS03G0026700	XS10G0093600	0.846533
XS03G0026700	XS03G0057800	0.851878
XS03G0026700	XS05G0020000	0.890811
XS03G0026700	XS06G0051600	0.872049
XS03G0026700	XS01G0315800	0.879104
XS03G0026700	XS13G0066000	0.825671
XS03G0026700	XS13G0141400	0.879483
XS03G0026700	XS06G0147900	0.935155
XS03G0026700	XS12G0045100	0.925775
XS03G0026700	XS08G0146400	0.864638
XS03G0026700	XS01G0238800	0.873863
XS03G0026700	XS07G0072300	0.849069
XS03G0026700	XS14G0040600	0.848407
XS03G0026700	XS12G0065900	0.837238
XS03G0026700	XS01G0213800	0.869993
XS03G0026700	XS15G0015200	0.864863
XS03G0026700	XS13G0243500	0.826027
XS03G0026700	XS14G0059400	0.869007
XS03G0026700	XS12G0125600	0.883757
XS03G0026700	XS12G0221500	0.875116
XS03G0026700	XS01G0295400	0.905423
XS03G0026700	XSUnG0067800	0.921294
XS03G0026700	XS07G0095700	0.869129
XS03G0026700	XS01G0341200	0.883704
XS03G0026700	XS12G0013000	0.925265
XS03G0026700	XS05G0130400	0.863679
XS03G0026700	XS01G0356200	0.8256
XS03G0026700	XS14G0070900	0.871302
XS03G0026700	XS10G0177300	0.931007
XS03G0026700	XS03G0019500	0.829869
XS03G0026700	XS04G0004100	0.906511
XS03G0026700	XS07G0027700	0.89686
XS03G0026700	XS13G0120300	0.881143
XS03G0026700	XS07G0012400	0.880893
XS03G0026700	XS05G0253700	0.815893
XS03G0026700	XS03G0147200	0.847901
XS03G0026700	XS13G0062600	0.80874
XS03G0026700	XS01G0188800	0.846773
XS03G0026700	XS12G0015900	0.844244
XS03G0026700	XS14G0002500	0.838327
XS03G0026700	XS11G0010500	0.905733
XS03G0026700	XS08G0056400	0.891637
XS03G0026700	XS07G0001400	0.858569
XS03G0026700	XS08G0215600	0.890524
XS03G0026700	XS10G0174600	0.867319
XS03G0026700	XS12G0236800	0.874197
XS03G0026700	XS08G0238900	0.829958
XS03G0026700	XS03G0019600	0.86723
XS03G0026700	XS11G0215300	0.933111
XS03G0026700	XS02G0157100	0.846922
XS03G0026700	XS04G0165000	0.885657
XS03G0026700	XS07G0075700	0.858097
XS03G0026700	XS11G0188400	0.864759
XS03G0026700	XS11G0097700	0.806132
XS03G0026700	XS04G0151900	0.924151
XS03G0026700	XS04G0234100	0.872372
XS03G0026700	XSUnG0107300	0.850301
XS03G0026700	XS05G0104700	0.948013
XS03G0026700	XS05G0258700	0.821221
XS03G0026700	XS06G0122800	0.85182
XS03G0026700	XS06G0148800	0.918541
XS03G0026700	XS08G0226600	0.850911
XS03G0026700	XS01G0275200	0.867478
XS03G0026700	XSUnG0143000	0.878193
XS03G0026700	XS11G0179800	0.865311
XS03G0026700	XS09G0218500	0.858384
XS03G0026700	XSUnG0259700	0.817475
XS03G0026700	XS01G0383000	0.891627
XS03G0026700	XS06G0094800	0.82948
XS03G0026700	XS03G0202000	0.866871
XS03G0026700	XS14G0007700	0.869011
XS03G0026700	XS03G0245600	0.83804
XS03G0026700	XS05G0049800	0.812246
XS03G0026700	XSUnG0053700	0.90521
XS03G0026700	XS12G0060700	0.936162
XS03G0026700	XS10G0030700	0.900393
XS03G0026700	XS02G0096100	0.847176
XS03G0026700	XS14G0021500	0.942483
XS03G0026700	XS01G0284700	0.876543
XS03G0026700	XS05G0040600	0.872782
XS03G0026700	XSUnG0229600	0.851485
XS03G0026700	XS01G0378400	0.858333
XS03G0026700	XS13G0015400	0.808653
XS03G0026700	XS01G0384000	0.918478
XS03G0026700	XS13G0120700	0.928953
XS03G0026700	XS10G0074200	0.87306
XS08G0006700	XS04G0203300	0.835434
XS08G0006700	XS07G0251500	0.835417
XS08G0006700	XSUnG0168600	0.836105
XS08G0006700	XS01G0006300	0.810634
XS08G0006700	XS13G0135300	0.849561
XS08G0006700	XSUnG0020700	0.859492
XS08G0006700	XS03G0176700	0.854343
XS08G0006700	XS03G0158700	0.941853
XS08G0006700	XS01G0376800	0.807322
XS08G0006700	XS13G0009700	0.876467
XS08G0006700	XS12G0232600	0.895687
XS08G0006700	XS07G0024600	0.811133
XS08G0006700	XS13G0120800	0.917695
XS08G0006700	XS14G0106200	0.860982
XS08G0006700	XS07G0243200	0.936302
XS08G0006700	XS10G0093600	0.816031
XS08G0006700	XS09G0218100	0.829008
XS08G0006700	XS12G0166900	0.940743
XS08G0006700	XS02G0268100	0.847609
XS08G0006700	XS01G0152900	0.936835
XS08G0006700	XS13G0066000	0.832306
XS08G0006700	XS13G0141400	0.895857
XS08G0006700	XS11G0051300	0.803291
XS08G0006700	XS08G0146400	0.829976
XS08G0006700	XS14G0040600	0.881453
XS08G0006700	XS14G0021600	0.887899
XS08G0006700	XS06G0002500	0.91423
XS08G0006700	XS04G0029000	0.876824
XS08G0006700	XS10G0090900	0.891997
XS08G0006700	XS01G0295400	0.812434
XS08G0006700	XSUnG0149500	0.811828
XS08G0006700	XS05G0021800	0.896924
XS08G0006700	XS09G0022000	0.853435
XS08G0006700	XS02G0069200	0.849567
XS08G0006700	XS07G0027700	0.859553
XS08G0006700	XS06G0152300	0.853264
XS08G0006700	XS03G0186900	0.894474
XS08G0006700	XS08G0166300	0.895857
XS08G0006700	XS01G0188800	0.866307
XS08G0006700	XS12G0015900	0.81754
XS08G0006700	XS03G0019600	0.875648
XS08G0006700	XS03G0253200	0.859768
XS08G0006700	XS04G0172500	0.845092
XS08G0006700	XS03G0020100	0.829969
XS08G0006700	XS07G0075800	0.836475
XS08G0006700	XSUnG0107300	0.831024
XS08G0006700	XS05G0164600	0.828157
XS08G0006700	XS01G0363100	0.87492
XS08G0006700	XS01G0122700	0.961102
XS08G0006700	XS08G0226600	0.929264
XS08G0006700	XS01G0275200	0.942705
XS08G0006700	XS06G0064900	0.966386
XS08G0006700	XSUnG0143000	0.846858
XS08G0006700	XS10G0051400	0.8528
XS08G0006700	XS01G0212400	0.841114
XS08G0006700	XSUnG0053700	0.819203
XS08G0006700	XS14G0021500	0.801987
XS08G0006700	XS10G0037400	0.845865
XS08G0006700	XSUnG0229600	0.879394
XS08G0006700	XS14G0126900	0.810895
XS08G0006700	XS02G0058000	0.905104
XS08G0006700	XS11G0117600	0.877273
XS03G0323300	XS07G0051900	0.886186
XS03G0323300	XS10G0140100	0.80279
XS03G0323300	XS12G0072400	0.884263
XS03G0323300	XS09G0185100	0.907003
XS03G0323300	XS13G0248000	0.852849
XS03G0323300	XS13G0120200	0.9397
XS03G0323300	XS02G0073500	0.881996
XS03G0323300	XSUnG0225500	0.896818
XS03G0323300	XS01G0380300	0.847822
XS03G0323300	XS05G0035700	0.808477
XS03G0323300	XS13G0135300	0.802226
XS03G0323300	XS09G0230700	0.887493
XS03G0323300	XS03G0176700	0.880782
XS03G0323300	XS13G0163900	0.812284
XS03G0323300	XS11G0214400	0.809914
XS03G0323300	XS02G0103900	0.891616
XS03G0323300	XS06G0006700	0.854814
XS03G0323300	XS08G0203300	0.909539
XS03G0323300	XS07G0094600	0.852459
XS03G0323300	XS03G0161600	0.883153
XS03G0323300	XS09G0028700	0.807489
XS03G0323300	XS12G0072300	0.849801
XS03G0323300	XS07G0024600	0.825003
XS03G0323300	XS08G0019100	0.812765
XS03G0323300	XS06G0048100	0.835775
XS03G0323300	XSUnG0221700	0.861057
XS03G0323300	XS04G0079800	0.906987
XS03G0323300	XS07G0243200	0.8447
XS03G0323300	XS07G0261900	0.807396
XS03G0323300	XS10G0093600	0.913592
XS03G0323300	XS09G0218100	0.860538
XS03G0323300	XS06G0051600	0.810159
XS03G0323300	XS01G0315800	0.80508
XS03G0323300	XS13G0066000	0.843947
XS03G0323300	XS11G0198400	0.844326
XS03G0323300	XS11G0215200	0.910883
XS03G0323300	XS08G0146400	0.822902
XS03G0323300	XS14G0040600	0.832917
XS03G0323300	XS12G0125600	0.85326
XS03G0323300	XS01G0358600	0.815626
XS03G0323300	XS06G0005000	0.857978
XS03G0323300	XS01G0295400	0.870802
XS03G0323300	XSUnG0067800	0.830666
XS03G0323300	XS06G0151800	0.82708
XS03G0323300	XS12G0116200	0.850679
XS03G0323300	XS11G0198200	0.853263
XS03G0323300	XSUnG0149500	0.86988
XS03G0323300	XS05G0130400	0.846494
XS03G0323300	XS09G0022000	0.82052
XS03G0323300	XS01G0356200	0.896166
XS03G0323300	XS04G0004100	0.85787
XS03G0323300	XS13G0120300	0.82261
XS03G0323300	XS14G0092800	0.907325
XS03G0323300	XS07G0129900	0.840473
XS03G0323300	XS05G0050200	0.848166
XS03G0323300	XS03G0147200	0.837244
XS03G0323300	XS13G0062600	0.927198
XS03G0323300	XS13G0034900	0.824291
XS03G0323300	XS14G0002500	0.882708
XS03G0323300	XS13G0176400	0.844577
XS03G0323300	XS11G0010500	0.889798
XS03G0323300	XS07G0001400	0.845693
XS03G0323300	XS08G0215600	0.822165
XS03G0323300	XS12G0236800	0.804666
XS03G0323300	XS03G0019600	0.867163
XS03G0323300	XS04G0165000	0.861827
XS03G0323300	XS06G0059900	0.855487
XS03G0323300	XS05G0264400	0.824418
XS03G0323300	XS04G0234100	0.889128
XS03G0323300	XSUnG0107300	0.829897
XS03G0323300	XS05G0164600	0.838163
XS03G0323300	XS05G0258700	0.871397
XS03G0323300	XS14G0069300	0.91338
XS03G0323300	XS06G0122800	0.885884
XS03G0323300	XS10G0122100	0.822213
XS03G0323300	XS09G0023500	0.82691
XS03G0323300	XS08G0226600	0.828677
XS03G0323300	XS04G0212600	0.84979
XS03G0323300	XSUnG0143000	0.885531
XS03G0323300	XS01G0228100	0.847142
XS03G0323300	XS11G0179800	0.895351
XS03G0323300	XS09G0218500	0.848457
XS03G0323300	XS01G0383000	0.879266
XS03G0323300	XS06G0094800	0.878454
XS03G0323300	XS14G0007700	0.838371
XS03G0323300	XS05G0049800	0.95296
XS03G0323300	XS05G0058300	0.839893
XS03G0323300	XSUnG0053700	0.877118
XS03G0323300	XS14G0021500	0.845153
XS03G0323300	XS13G0011400	0.868352
XS03G0323300	XS11G0081600	0.859892
XS03G0323300	XS01G0378400	0.872005
XS03G0323300	XS07G0196100	0.873631
XS03G0323300	XS11G0117600	0.829923
XS03G0323300	XS01G0384000	0.885671
XS12G0072400	XS07G0051900	0.922606
XS12G0072400	XS10G0140100	0.95799
XS12G0072400	XS09G0185100	0.900685
XS12G0072400	XS13G0248000	0.945749
XS12G0072400	XS13G0120200	0.927237
XS12G0072400	XS02G0073500	0.894299
XS12G0072400	XSUnG0225500	0.863056
XS12G0072400	XS01G0380300	0.974192
XS12G0072400	XS05G0035700	0.820245
XS12G0072400	XS09G0230700	0.991575
XS12G0072400	XS03G0176700	0.809777
XS12G0072400	XS13G0163900	0.957551
XS12G0072400	XS02G0103900	0.944603
XS12G0072400	XS07G0040000	0.810588
XS12G0072400	XS08G0203300	0.958414
XS12G0072400	XS07G0094600	0.989362
XS12G0072400	XS03G0161600	0.910852
XS12G0072400	XS09G0028700	0.845673
XS12G0072400	XS06G0165000	0.847583
XS12G0072400	XS04G0133900	0.810092
XS12G0072400	XS12G0072300	0.996116
XS12G0072400	XS07G0024600	0.810152
XS12G0072400	XS08G0019100	0.950743
XS12G0072400	XS06G0048100	0.902263
XS12G0072400	XSUnG0221700	0.873493
XS12G0072400	XS04G0079800	0.959057
XS12G0072400	XS07G0261900	0.870545
XS12G0072400	XS06G0063900	0.812941
XS12G0072400	XS10G0093600	0.909165
XS12G0072400	XS09G0218100	0.855535
XS12G0072400	XS05G0020000	0.867153
XS12G0072400	XS06G0051600	0.898225
XS12G0072400	XS01G0315800	0.856948
XS12G0072400	XS08G0001700	0.871098
XS12G0072400	XS01G0283000	0.914883
XS12G0072400	XS11G0198400	0.971423
XS12G0072400	XS06G0147900	0.810498
XS12G0072400	XS11G0215200	0.834587
XS12G0072400	XS01G0238800	0.849845
XS12G0072400	XS07G0072300	0.863256
XS12G0072400	XS01G0213800	0.821989
XS12G0072400	XS13G0243500	0.84474
XS12G0072400	XS14G0059400	0.847462
XS12G0072400	XS12G0125600	0.928086
XS12G0072400	XS01G0358600	0.970774
XS12G0072400	XS06G0005000	0.988057
XS12G0072400	XS12G0221500	0.818456
XS12G0072400	XS01G0295400	0.860279
XS12G0072400	XSUnG0067800	0.833562
XS12G0072400	XS07G0095700	0.860499
XS12G0072400	XS12G0116200	0.991031
XS12G0072400	XS03G0231300	0.933413
XS12G0072400	XS05G0130400	0.940182
XS12G0072400	XS09G0022000	0.800744
XS12G0072400	XS01G0356200	0.922933
XS12G0072400	XS07G0096100	0.917483
XS12G0072400	XS13G0120300	0.902107
XS12G0072400	XS14G0092800	0.948699
XS12G0072400	XS01G0241900	0.803068
XS12G0072400	XS05G0253700	0.872996
XS12G0072400	XS05G0050200	0.894686
XS12G0072400	XS03G0147200	0.949454
XS12G0072400	XS13G0062600	0.885021
XS12G0072400	XS14G0002500	0.968709
XS12G0072400	XS11G0010500	0.898274
XS12G0072400	XS07G0001400	0.855605
XS12G0072400	XS08G0215600	0.836591
XS12G0072400	XS12G0236800	0.884341
XS12G0072400	XS03G0019600	0.818808
XS12G0072400	XS02G0157100	0.88813
XS12G0072400	XS04G0165000	0.808474
XS12G0072400	XS07G0075700	0.865932
XS12G0072400	XS11G0188400	0.820287
XS12G0072400	XS06G0059900	0.990457
XS12G0072400	XS04G0151900	0.815526
XS12G0072400	XS04G0234100	0.887617
XS12G0072400	XSUnG0107300	0.886326
XS12G0072400	XS05G0258700	0.980419
XS12G0072400	XS14G0069300	0.959684
XS12G0072400	XS06G0122800	0.952992
XS12G0072400	XS10G0202400	0.90539
XS12G0072400	XS06G0148800	0.864249
XS12G0072400	XSUnG0143000	0.831917
XS12G0072400	XS01G0228100	0.989262
XS12G0072400	XS11G0179800	0.931973
XS12G0072400	XS09G0218500	0.931891
XS12G0072400	XS01G0383000	0.82488
XS12G0072400	XS06G0094800	0.832871
XS12G0072400	XS14G0007700	0.939105
XS12G0072400	XS13G0200100	0.89893
XS12G0072400	XS05G0049800	0.923931
XS12G0072400	XSUnG0053700	0.847367
XS12G0072400	XS14G0021500	0.849532
XS12G0072400	XS01G0284700	0.818391
XS12G0072400	XS05G0040600	0.887556
XS12G0072400	XS13G0011400	0.998019
XS12G0072400	XS11G0081600	0.978291
XS12G0072400	XS07G0196100	0.995257
XS12G0072400	XS01G0384000	0.913745
XS12G0072400	XS13G0120700	0.868057
XS12G0072400	XS10G0074200	0.847173
XS09G0185100	XS07G0051900	0.975818
XS09G0185100	XS10G0140100	0.830212
XS09G0185100	XS03G0201900	0.827488
XS09G0185100	XS07G0251500	0.857393
XS09G0185100	XS13G0248000	0.937841
XS09G0185100	XS13G0120200	0.971007
XS09G0185100	XS02G0073500	0.93928
XS09G0185100	XSUnG0225500	0.989426
XS09G0185100	XS01G0380300	0.803933
XS09G0185100	XS05G0035700	0.948128
XS09G0185100	XS09G0230700	0.862093
XS09G0185100	XS03G0176700	0.904823
XS09G0185100	XS13G0163900	0.898377
XS09G0185100	XS11G0214400	0.956839
XS09G0185100	XS02G0103900	0.981598
XS09G0185100	XS07G0040000	0.829139
XS09G0185100	XS08G0046300	0.831182
XS09G0185100	XS01G0324000	0.944757
XS09G0185100	XS06G0006700	0.917715
XS09G0185100	XS01G0359300	0.910932
XS09G0185100	XS08G0203300	0.900083
XS09G0185100	XS05G0153200	0.850001
XS09G0185100	XS07G0094600	0.899091
XS09G0185100	XS03G0161600	0.900059
XS09G0185100	XS09G0028700	0.934712
XS09G0185100	XS06G0165000	0.890605
XS09G0185100	XS04G0133900	0.863819
XS09G0185100	XS12G0072300	0.876995
XS09G0185100	XS08G0019100	0.901738
XS09G0185100	XS06G0048100	0.904467
XS09G0185100	XS02G0029200	0.808145
XS09G0185100	XS03G0023700	0.843298
XS09G0185100	XSUnG0221700	0.9621
XS09G0185100	XS14G0106200	0.816161
XS09G0185100	XS04G0079800	0.873005
XS09G0185100	XS07G0243200	0.88576
XS09G0185100	XS07G0261900	0.9377
XS09G0185100	XS06G0063900	0.963817
XS09G0185100	XS10G0093600	0.95672
XS09G0185100	XS09G0218100	0.818025
XS09G0185100	XS03G0057800	0.826243
XS09G0185100	XS06G0078700	0.857978
XS09G0185100	XS05G0020000	0.904474
XS09G0185100	XS06G0051600	0.904569
XS09G0185100	XS01G0315800	0.955568
XS09G0185100	XS08G0001700	0.92245
XS09G0185100	XS13G0066000	0.941119
XS09G0185100	XS11G0198400	0.822573
XS09G0185100	XS06G0147900	0.879835
XS09G0185100	XS01G0331600	0.881004
XS09G0185100	XS12G0045100	0.823871
XS09G0185100	XS11G0215200	0.81985
XS09G0185100	XS01G0238800	0.881705
XS09G0185100	XS07G0072300	0.950602
XS09G0185100	XS14G0040600	0.874641
XS09G0185100	XS12G0065900	0.837438
XS09G0185100	XS06G0002500	0.838258
XS09G0185100	XS08G0200900	0.818759
XS09G0185100	XS04G0029000	0.805014
XS09G0185100	XS01G0213800	0.883832
XS09G0185100	XS15G0015200	0.828772
XS09G0185100	XS10G0090900	0.830625
XS09G0185100	XS13G0243500	0.878959
XS09G0185100	XS14G0059400	0.887608
XS09G0185100	XS12G0125600	0.947498
XS09G0185100	XS01G0358600	0.843717
XS09G0185100	XS04G0231700	0.939453
XS09G0185100	XS06G0005000	0.905942
XS09G0185100	XS12G0221500	0.870291
XS09G0185100	XS01G0295400	0.946898
XS09G0185100	XSUnG0067800	0.900795
XS09G0185100	XS06G0151800	0.918825
XS09G0185100	XS07G0095700	0.910096
XS09G0185100	XS12G0116200	0.894104
XS09G0185100	XS11G0198200	0.892476
XS09G0185100	XSUnG0149500	0.898571
XS09G0185100	XS01G0341200	0.814991
XS09G0185100	XS12G0013000	0.846102
XS09G0185100	XS05G0130400	0.938224
XS09G0185100	XS09G0022000	0.893747
XS09G0185100	XS01G0356200	0.978423
XS09G0185100	XS06G0084600	0.95668
XS09G0185100	XS14G0070900	0.847381
XS09G0185100	XS04G0004100	0.898952
XS09G0185100	XS07G0007100	0.830854
XS09G0185100	XS07G0027700	0.854267
XS09G0185100	XS13G0120300	0.910787
XS09G0185100	XS14G0092800	0.894831
XS09G0185100	XS07G0012400	0.862751
XS09G0185100	XS05G0253700	0.859097
XS09G0185100	XS05G0050200	0.813094
XS09G0185100	XS03G0147200	0.916182
XS09G0185100	XS13G0062600	0.978604
XS09G0185100	XS01G0305100	0.912757
XS09G0185100	XS12G0015900	0.805426
XS09G0185100	XS14G0002500	0.959046
XS09G0185100	XS11G0010500	0.922162
XS09G0185100	XS08G0056400	0.816052
XS09G0185100	XS07G0001400	0.957875
XS09G0185100	XS08G0215600	0.941209
XS09G0185100	XS10G0174600	0.834256
XS09G0185100	XS12G0236800	0.908398
XS09G0185100	XS03G0019600	0.921441
XS09G0185100	XS04G0165000	0.92069
XS09G0185100	XS10G0120300	0.835828
XS09G0185100	XS07G0075700	0.914336
XS09G0185100	XS11G0188400	0.946921
XS09G0185100	XS06G0059900	0.854244
XS09G0185100	XS05G0264400	0.828921
XS09G0185100	XS11G0097700	0.818565
XS09G0185100	XS04G0151900	0.921192
XS09G0185100	XS04G0234100	0.816507
XS09G0185100	XS14G0017000	0.908415
XS09G0185100	XSUnG0107300	0.895483
XS09G0185100	XS05G0104700	0.84445
XS09G0185100	XS05G0258700	0.916057
XS09G0185100	XS14G0069300	0.912684
XS09G0185100	XS01G0363100	0.836867
XS09G0185100	XS07G0222000	0.886249
XS09G0185100	XS06G0122800	0.964925
XS09G0185100	XS10G0122100	0.95328
XS09G0185100	XS10G0202400	0.823748
XS09G0185100	XS06G0148800	0.926025
XS09G0185100	XS09G0023500	0.843571
XS09G0185100	XS06G0039700	0.845384
XS09G0185100	XS06G0064900	0.821278
XS09G0185100	XSUnG0143000	0.8613
XS09G0185100	XS01G0228100	0.90152
XS09G0185100	XS11G0179800	0.937898
XS09G0185100	XS09G0218500	0.942026
XS09G0185100	XS01G0383000	0.862728
XS09G0185100	XS06G0094800	0.977234
XS09G0185100	XS03G0202000	0.813829
XS09G0185100	XS14G0007700	0.935435
XS09G0185100	XS05G0049800	0.910679
XS09G0185100	XS05G0058300	0.806154
XS09G0185100	XSUnG0053700	0.95361
XS09G0185100	XS10G0030700	0.841362
XS09G0185100	XS02G0096100	0.850198
XS09G0185100	XS14G0021500	0.940687
XS09G0185100	XS01G0284700	0.868429
XS09G0185100	XS06G0006500	0.841282
XS09G0185100	XS05G0040600	0.902179
XS09G0185100	XS08G0256900	0.858874
XS09G0185100	XSUnG0229600	0.812169
XS09G0185100	XS13G0011400	0.876294
XS09G0185100	XS03G0069200	0.808316
XS09G0185100	XS11G0081600	0.81508
XS09G0185100	XS01G0378400	0.944794
XS09G0185100	XS07G0196100	0.895632
XS09G0185100	XS11G0052500	0.959202
XS09G0185100	XS01G0384000	0.874271
XS09G0185100	XS13G0120700	0.872191
XS09G0185100	XS10G0074200	0.861196
XS07G0251500	XS07G0051900	0.85172
XS07G0251500	XSUnG0168600	0.916267
XS07G0251500	XS13G0120200	0.85068
XS07G0251500	XSUnG0225500	0.888542
XS07G0251500	XS01G0006300	0.810544
XS07G0251500	XS05G0035700	0.846547
XS07G0251500	XS07G0262200	0.81996
XS07G0251500	XS03G0176700	0.805532
XS07G0251500	XS03G0158700	0.858965
XS07G0251500	XS11G0214400	0.872847
XS07G0251500	XS02G0103900	0.811285
XS07G0251500	XS07G0040000	0.941387
XS07G0251500	XS13G0009700	0.828499
XS07G0251500	XS01G0324000	0.806025
XS07G0251500	XS06G0006700	0.894084
XS07G0251500	XS01G0359300	0.85646
XS07G0251500	XS12G0232600	0.836982
XS07G0251500	XS09G0028700	0.860729
XS07G0251500	XS02G0029200	0.88857
XS07G0251500	XS03G0023700	0.904965
XS07G0251500	XSUnG0221700	0.835801
XS07G0251500	XS14G0106200	0.801863
XS07G0251500	XS07G0243200	0.899976
XS07G0251500	XS07G0261900	0.803817
XS07G0251500	XS10G0093600	0.92849
XS07G0251500	XS09G0218100	0.835367
XS07G0251500	XS12G0166900	0.800124
XS07G0251500	XS05G0020000	0.892482
XS07G0251500	XS01G0315800	0.813596
XS07G0251500	XS13G0066000	0.943708
XS07G0251500	XS01G0331600	0.834188
XS07G0251500	XS12G0045100	0.896515
XS07G0251500	XS11G0051300	0.804474
XS07G0251500	XS07G0072300	0.927321
XS07G0251500	XS14G0040600	0.807806
XS07G0251500	XS06G0002500	0.896081
XS07G0251500	XS08G0200900	0.921432
XS07G0251500	XS04G0029000	0.848546
XS07G0251500	XS10G0090900	0.841781
XS07G0251500	XS04G0231700	0.81627
XS07G0251500	XS01G0295400	0.865359
XS07G0251500	XS11G0200100	0.828563
XS07G0251500	XS06G0151800	0.892934
XS07G0251500	XS11G0198200	0.857171
XS07G0251500	XSUnG0149500	0.892335
XS07G0251500	XS05G0021800	0.808544
XS07G0251500	XS09G0022000	0.88261
XS07G0251500	XS06G0084600	0.842786
XS07G0251500	XS02G0069200	0.830349
XS07G0251500	XS07G0027700	0.89456
XS07G0251500	XS03G0186900	0.861785
XS07G0251500	XS06G0049400	0.865713
XS07G0251500	XS07G0115300	0.818019
XS07G0251500	XS13G0062600	0.841901
XS07G0251500	XS01G0305100	0.835842
XS07G0251500	XS12G0015900	0.887683
XS07G0251500	XS14G0002500	0.857135
XS07G0251500	XS13G0176400	0.804955
XS07G0251500	XS08G0056400	0.835898
XS07G0251500	XS07G0001400	0.827263
XS07G0251500	XS08G0215600	0.954698
XS07G0251500	XS03G0019600	0.917407
XS07G0251500	XS03G0253200	0.864857
XS07G0251500	XS10G0120300	0.836626
XS07G0251500	XS11G0188400	0.852878
XS07G0251500	XS04G0172500	0.888841
XS07G0251500	XS05G0264400	0.851561
XS07G0251500	XS03G0020100	0.803514
XS07G0251500	XS11G0097700	0.917264
XS07G0251500	XS04G0234100	0.817798
XS07G0251500	XS14G0017000	0.834376
XS07G0251500	XSUnG0107300	0.869413
XS07G0251500	XS13G0042100	0.841737
XS07G0251500	XS13G0120600	0.899962
XS07G0251500	XS14G0069300	0.871012
XS07G0251500	XS01G0363100	0.852642
XS07G0251500	XS07G0222000	0.977723
XS07G0251500	XS01G0122700	0.874714
XS07G0251500	XS10G0122100	0.9142
XS07G0251500	XS08G0226600	0.880727
XS07G0251500	XS06G0039700	0.928739
XS07G0251500	XS01G0275200	0.823558
XS07G0251500	XS06G0064900	0.902999
XS07G0251500	XSUnG0143000	0.810028
XS07G0251500	XS03G0245600	0.824764
XS07G0251500	XSUnG0053700	0.923747
XS07G0251500	XS14G0021500	0.879435
XS07G0251500	XSUnG0229600	0.81966
XS07G0251500	XS03G0069200	0.91911
XS07G0251500	XS01G0378400	0.896501
XS07G0251500	XS14G0126900	0.872794
XS07G0251500	XS11G0052500	0.891681
XS07G0251500	XS13G0120700	0.900206
XS13G0248000	XS07G0051900	0.917637
XS13G0248000	XS10G0140100	0.904537
XS13G0248000	XS03G0201900	0.915028
XS13G0248000	XS13G0120200	0.910277
XS13G0248000	XS02G0073500	0.971405
XS13G0248000	XSUnG0225500	0.911043
XS13G0248000	XS01G0380300	0.850307
XS13G0248000	XS05G0035700	0.93207
XS13G0248000	XS09G0230700	0.912767
XS13G0248000	XS03G0176700	0.811326
XS13G0248000	XS13G0163900	0.983535
XS13G0248000	XS11G0214400	0.850023
XS13G0248000	XS02G0103900	0.956977
XS13G0248000	XS08G0046300	0.927141
XS13G0248000	XS01G0324000	0.865322
XS13G0248000	XS06G0006700	0.857131
XS13G0248000	XS10G0177600	0.825382
XS13G0248000	XS08G0203300	0.8991
XS13G0248000	XS05G0153200	0.846032
XS13G0248000	XS07G0094600	0.973955
XS13G0248000	XS03G0161600	0.89902
XS13G0248000	XS07G0033800	0.870398
XS13G0248000	XS02G0157400	0.885743
XS13G0248000	XS09G0028700	0.853123
XS13G0248000	XS06G0165000	0.971949
XS13G0248000	XS04G0133900	0.954055
XS13G0248000	XS12G0072300	0.94365
XS13G0248000	XS08G0019100	0.980671
XS13G0248000	XS06G0048100	0.978279
XS13G0248000	XS02G0029200	0.817469
XS13G0248000	XSUnG0221700	0.963483
XS13G0248000	XS04G0079800	0.916613
XS13G0248000	XS07G0261900	0.972365
XS13G0248000	XS06G0063900	0.912897
XS13G0248000	XS10G0093600	0.884414
XS13G0248000	XS03G0057800	0.895518
XS13G0248000	XS05G0020000	0.919202
XS13G0248000	XS06G0051600	0.989653
XS13G0248000	XS01G0315800	0.960352
XS13G0248000	XS08G0001700	0.954647
XS13G0248000	XS11G0198400	0.850663
XS13G0248000	XS06G0147900	0.940069
XS13G0248000	XS01G0331600	0.808409
XS13G0248000	XS12G0045100	0.808341
XS13G0248000	XS11G0215200	0.830279
XS13G0248000	XS01G0238800	0.972443
XS13G0248000	XS07G0072300	0.896138
XS13G0248000	XS12G0065900	0.867282
XS13G0248000	XS01G0213800	0.961742
XS13G0248000	XS15G0015200	0.918044
XS13G0248000	XS13G0243500	0.937192
XS13G0248000	XS14G0059400	0.967633
XS13G0248000	XS12G0125600	0.994821
XS13G0248000	XS01G0358600	0.923463
XS13G0248000	XS04G0231700	0.832255
XS13G0248000	XS06G0005000	0.978448
XS13G0248000	XS12G0221500	0.955094
XS13G0248000	XS01G0295400	0.906301
XS13G0248000	XSUnG0067800	0.944296
XS13G0248000	XS06G0151800	0.825518
XS13G0248000	XS07G0095700	0.956213
XS13G0248000	XS12G0116200	0.969795
XS13G0248000	XS12G0238100	0.830933
XS13G0248000	XS01G0341200	0.815334
XS13G0248000	XS12G0013000	0.893501
XS13G0248000	XS05G0130400	0.998072
XS13G0248000	XS01G0356200	0.957466
XS13G0248000	XS06G0084600	0.857859
XS13G0248000	XS14G0070900	0.939506
XS13G0248000	XS04G0004100	0.879543
XS13G0248000	XS13G0120300	0.990352
XS13G0248000	XS14G0092800	0.945078
XS13G0248000	XS07G0012400	0.902836
XS13G0248000	XS05G0253700	0.957144
XS13G0248000	XS03G0147200	0.996902
XS13G0248000	XS13G0062600	0.914788
XS13G0248000	XS14G0002500	0.961839
XS13G0248000	XS11G0010500	0.958561
XS13G0248000	XS08G0056400	0.828765
XS13G0248000	XS07G0001400	0.913014
XS13G0248000	XS08G0215600	0.884927
XS13G0248000	XS10G0174600	0.92235
XS13G0248000	XS12G0236800	0.986329
XS13G0248000	XS08G0238900	0.835664
XS13G0248000	XS03G0019600	0.818474
XS13G0248000	XS11G0215300	0.864974
XS13G0248000	XS02G0157100	0.929474
XS13G0248000	XS04G0165000	0.895331
XS13G0248000	XS07G0075700	0.980502
XS13G0248000	XS11G0188400	0.903846
XS13G0248000	XS06G0059900	0.899104
XS13G0248000	XS04G0151900	0.948881
XS13G0248000	XS04G0234100	0.83885
XS13G0248000	XSUnG0107300	0.864265
XS13G0248000	XS05G0104700	0.90327
XS13G0248000	XS05G0258700	0.987812
XS13G0248000	XS14G0069300	0.892516
XS13G0248000	XS06G0122800	0.991164
XS13G0248000	XS10G0122100	0.811019
XS13G0248000	XS10G0202400	0.877539
XS13G0248000	XS06G0148800	0.972474
XS13G0248000	XSUnG0143000	0.819616
XS13G0248000	XS07G0064100	0.81127
XS13G0248000	XS01G0228100	0.955145
XS13G0248000	XS11G0179800	0.986266
XS13G0248000	XS09G0218500	0.9973
XS13G0248000	XS01G0383000	0.903679
XS13G0248000	XS06G0094800	0.92519
XS13G0248000	XS03G0202000	0.89559
XS13G0248000	XS14G0007700	0.997039
XS13G0248000	XS05G0049800	0.874904
XS13G0248000	XS05G0058300	0.834101
XS13G0248000	XSUnG0053700	0.886241
XS13G0248000	XS12G0060700	0.833538
XS13G0248000	XS10G0030700	0.873805
XS13G0248000	XS02G0096100	0.894049
XS13G0248000	XS14G0021500	0.919759
XS13G0248000	XS01G0284700	0.957781
XS13G0248000	XS05G0040600	0.987047
XS13G0248000	XS13G0011400	0.940202
XS13G0248000	XS11G0081600	0.860754
XS13G0248000	XS01G0378400	0.86184
XS13G0248000	XS07G0196100	0.948908
XS13G0248000	XS13G0015400	0.801063
XS13G0248000	XS11G0052500	0.836314
XS13G0248000	XS01G0384000	0.926345
XS13G0248000	XS13G0120700	0.902114
XS13G0248000	XS10G0074200	0.967818
XS13G0120200	XS07G0051900	0.96873
XS13G0120200	XS10G0140100	0.870434
XS13G0120200	XS02G0073500	0.90679
XS13G0120200	XSUnG0225500	0.967611
XS13G0120200	XS01G0380300	0.868835
XS13G0120200	XS05G0035700	0.889338
XS13G0120200	XS09G0230700	0.911919
XS13G0120200	XS03G0176700	0.880427
XS13G0120200	XS13G0163900	0.877735
XS13G0120200	XS11G0214400	0.921651
XS13G0120200	XS02G0103900	0.954961
XS13G0120200	XS07G0040000	0.820363
XS13G0120200	XS01G0324000	0.884125
XS13G0120200	XS06G0006700	0.869491
XS13G0120200	XS01G0359300	0.92063
XS13G0120200	XS08G0203300	0.916092
XS13G0120200	XS05G0153200	0.804502
XS13G0120200	XS07G0094600	0.910384
XS13G0120200	XS03G0161600	0.901006
XS13G0120200	XS09G0028700	0.933415
XS13G0120200	XS06G0165000	0.826021
XS13G0120200	XS12G0072300	0.907405
XS13G0120200	XS08G0019100	0.882245
XS13G0120200	XS06G0048100	0.873779
XS13G0120200	XS03G0023700	0.858451
XS13G0120200	XSUnG0221700	0.907938
XS13G0120200	XS04G0079800	0.92579
XS13G0120200	XS07G0243200	0.880125
XS13G0120200	XS07G0261900	0.876993
XS13G0120200	XS06G0063900	0.89787
XS13G0120200	XS10G0093600	0.967363
XS13G0120200	XS09G0218100	0.903563
XS13G0120200	XS06G0078700	0.838856
XS13G0120200	XS05G0020000	0.892266
XS13G0120200	XS06G0051600	0.858834
XS13G0120200	XS01G0315800	0.890905
XS13G0120200	XS08G0001700	0.865947
XS13G0120200	XS13G0066000	0.908952
XS13G0120200	XS11G0198400	0.891322
XS13G0120200	XS06G0147900	0.812085
XS13G0120200	XS01G0331600	0.816182
XS13G0120200	XS11G0215200	0.861139
XS13G0120200	XS01G0238800	0.819237
XS13G0120200	XS07G0072300	0.916875
XS13G0120200	XS14G0040600	0.850596
XS13G0120200	XS06G0002500	0.847548
XS13G0120200	XS08G0200900	0.84224
XS13G0120200	XS01G0213800	0.811377
XS13G0120200	XS13G0243500	0.806183
XS13G0120200	XS14G0059400	0.820358
XS13G0120200	XS12G0125600	0.914273
XS13G0120200	XS01G0358600	0.859856
XS13G0120200	XS04G0231700	0.904249
XS13G0120200	XS06G0005000	0.914144
XS13G0120200	XS01G0295400	0.922687
XS13G0120200	XSUnG0067800	0.850819
XS13G0120200	XS06G0151800	0.939842
XS13G0120200	XS07G0095700	0.837968
XS13G0120200	XS12G0116200	0.906749
XS13G0120200	XS11G0198200	0.940802
XS13G0120200	XSUnG0149500	0.930345
XS13G0120200	XS03G0231300	0.810144
XS13G0120200	XS05G0130400	0.905876
XS13G0120200	XS09G0022000	0.871059
XS13G0120200	XS01G0356200	0.944493
XS13G0120200	XS06G0084600	0.902229
XS13G0120200	XS07G0096100	0.830318
XS13G0120200	XS04G0004100	0.853694
XS13G0120200	XS07G0027700	0.813323
XS13G0120200	XS13G0120300	0.868629
XS13G0120200	XS14G0092800	0.92471
XS13G0120200	XS01G0241900	0.8102
XS13G0120200	XS05G0050200	0.846145
XS13G0120200	XS03G0147200	0.891253
XS13G0120200	XS13G0062600	0.963212
XS13G0120200	XS01G0305100	0.847389
XS13G0120200	XS14G0002500	0.956115
XS13G0120200	XS13G0176400	0.857495
XS13G0120200	XS11G0010500	0.893282
XS13G0120200	XS07G0001400	0.90475
XS13G0120200	XS08G0215600	0.929054
XS13G0120200	XS12G0236800	0.852915
XS13G0120200	XS03G0019600	0.894141
XS13G0120200	XS03G0253200	0.805152
XS13G0120200	XS04G0165000	0.85175
XS13G0120200	XS10G0120300	0.816169
XS13G0120200	XS07G0075700	0.853877
XS13G0120200	XS11G0188400	0.862865
XS13G0120200	XS06G0059900	0.906489
XS13G0120200	XS05G0264400	0.902736
XS13G0120200	XS04G0151900	0.849482
XS13G0120200	XS04G0234100	0.85913
XS13G0120200	XS14G0017000	0.835678
XS13G0120200	XSUnG0107300	0.892081
XS13G0120200	XS05G0258700	0.911189
XS13G0120200	XS14G0069300	0.96159
XS13G0120200	XS01G0363100	0.811557
XS13G0120200	XS07G0222000	0.876177
XS13G0120200	XS06G0122800	0.937185
XS13G0120200	XS10G0122100	0.922192
XS13G0120200	XS10G0202400	0.843371
XS13G0120200	XS06G0148800	0.863606
XS13G0120200	XS08G0226600	0.81093
XS13G0120200	XS06G0039700	0.821025
XS13G0120200	XS06G0064900	0.820586
XS13G0120200	XSUnG0143000	0.847735
XS13G0120200	XS01G0228100	0.91884
XS13G0120200	XS11G0179800	0.906692
XS13G0120200	XS09G0218500	0.905046
XS13G0120200	XS01G0383000	0.848985
XS13G0120200	XS06G0094800	0.922573
XS13G0120200	XS14G0007700	0.905754
XS13G0120200	XS05G0049800	0.914931
XS13G0120200	XS05G0058300	0.816013
XS13G0120200	XSUnG0053700	0.936766
XS13G0120200	XS14G0021500	0.903879
XS13G0120200	XS06G0006500	0.819111
XS13G0120200	XS05G0040600	0.851128
XS13G0120200	XS08G0256900	0.820796
XS13G0120200	XS13G0011400	0.906166
XS13G0120200	XS03G0069200	0.81583
XS13G0120200	XS11G0081600	0.877921
XS13G0120200	XS01G0378400	0.93822
XS13G0120200	XS07G0196100	0.918338
XS13G0120200	XS11G0117600	0.806385
XS13G0120200	XS11G0052500	0.911867
XS13G0120200	XS01G0384000	0.861283
XS13G0120200	XS13G0120700	0.856525
XSUnG0225500	XS07G0051900	0.964465
XSUnG0225500	XS10G0140100	0.804187
XSUnG0225500	XS03G0201900	0.81159
XSUnG0225500	XS02G0073500	0.93514
XSUnG0225500	XS05G0035700	0.946317
XSUnG0225500	XS09G0230700	0.828658
XSUnG0225500	XS03G0176700	0.880672
XSUnG0225500	XS13G0163900	0.860022
XSUnG0225500	XS11G0214400	0.976713
XSUnG0225500	XS02G0103900	0.947029
XSUnG0225500	XS07G0040000	0.841378
XSUnG0225500	XS08G0046300	0.813963
XSUnG0225500	XS01G0324000	0.956198
XSUnG0225500	XS06G0006700	0.93431
XSUnG0225500	XS01G0359300	0.924107
XSUnG0225500	XS08G0203300	0.85376
XSUnG0225500	XS05G0153200	0.821009
XSUnG0225500	XS07G0094600	0.865439
XSUnG0225500	XS03G0161600	0.858657
XSUnG0225500	XS09G0028700	0.943954
XSUnG0225500	XS06G0165000	0.87123
XSUnG0225500	XS04G0133900	0.847814
XSUnG0225500	XS12G0072300	0.840659
XSUnG0225500	XS08G0019100	0.876675
XSUnG0225500	XS06G0048100	0.886007
XSUnG0225500	XS02G0029200	0.817109
XSUnG0225500	XS03G0023700	0.871584
XSUnG0225500	XSUnG0221700	0.956698
XSUnG0225500	XS14G0106200	0.804784
XSUnG0225500	XS04G0079800	0.860098
XSUnG0225500	XS07G0243200	0.887981
XSUnG0225500	XS07G0261900	0.927625
XSUnG0225500	XS06G0063900	0.949573
XSUnG0225500	XS10G0093600	0.951826
XSUnG0225500	XS09G0218100	0.819284
XSUnG0225500	XS03G0057800	0.838668
XSUnG0225500	XS06G0078700	0.815464
XSUnG0225500	XS05G0020000	0.904637
XSUnG0225500	XS06G0051600	0.879973
XSUnG0225500	XS01G0315800	0.949209
XSUnG0225500	XS08G0001700	0.901301
XSUnG0225500	XS13G0066000	0.960143
XSUnG0225500	XS06G0147900	0.875571
XSUnG0225500	XS01G0331600	0.909041
XSUnG0225500	XS12G0045100	0.818538
XSUnG0225500	XS11G0215200	0.828455
XSUnG0225500	XS01G0238800	0.86211
XSUnG0225500	XS07G0072300	0.944395
XSUnG0225500	XS14G0040600	0.868742
XSUnG0225500	XS12G0065900	0.82883
XSUnG0225500	XS06G0002500	0.839189
XSUnG0225500	XS08G0200900	0.824478
XSUnG0225500	XS01G0213800	0.867033
XSUnG0225500	XS15G0015200	0.815984
XSUnG0225500	XS10G0090900	0.811191
XSUnG0225500	XS13G0243500	0.839551
XSUnG0225500	XS14G0059400	0.863568
XSUnG0225500	XS12G0125600	0.931306
XSUnG0225500	XS01G0358600	0.81121
XSUnG0225500	XS04G0231700	0.936704
XSUnG0225500	XS06G0005000	0.873375
XSUnG0225500	XS12G0221500	0.851765
XSUnG0225500	XS01G0295400	0.934052
XSUnG0225500	XSUnG0067800	0.897772
XSUnG0225500	XS06G0151800	0.942406
XSUnG0225500	XS07G0095700	0.884108
XSUnG0225500	XS12G0116200	0.857041
XSUnG0225500	XS11G0198200	0.929587
XSUnG0225500	XSUnG0149500	0.905552
XSUnG0225500	XS01G0341200	0.809866
XSUnG0225500	XS12G0013000	0.822172
XSUnG0225500	XS05G0130400	0.910853
XSUnG0225500	XS09G0022000	0.870141
XSUnG0225500	XS01G0356200	0.943112
XSUnG0225500	XS06G0084600	0.959671
XSUnG0225500	XS14G0070900	0.831478
XSUnG0225500	XS04G0004100	0.884413
XSUnG0225500	XS07G0007100	0.852331
XSUnG0225500	XS07G0027700	0.886839
XSUnG0225500	XS13G0120300	0.889954
XSUnG0225500	XS14G0092800	0.874115
XSUnG0225500	XS07G0012400	0.850949
XSUnG0225500	XS05G0253700	0.80623
XSUnG0225500	XS03G0147200	0.886128
XSUnG0225500	XS06G0049400	0.805858
XSUnG0225500	XS13G0062600	0.976369
XSUnG0225500	XS01G0305100	0.926819
XSUnG0225500	XS12G0015900	0.842142
XSUnG0225500	XS14G0002500	0.93863
XSUnG0225500	XS13G0176400	0.83493
XSUnG0225500	XS11G0010500	0.911986
XSUnG0225500	XS08G0056400	0.840962
XSUnG0225500	XS07G0001400	0.932343
XSUnG0225500	XS08G0215600	0.962917
XSUnG0225500	XS10G0174600	0.82555
XSUnG0225500	XS12G0236800	0.884299
XSUnG0225500	XS03G0019600	0.91697
XSUnG0225500	XS11G0215300	0.813625
XSUnG0225500	XS03G0253200	0.800489
XSUnG0225500	XS04G0165000	0.907735
XSUnG0225500	XS10G0120300	0.86075
XSUnG0225500	XS07G0075700	0.896172
XSUnG0225500	XS11G0188400	0.935547
XSUnG0225500	XS06G0059900	0.819827
XSUnG0225500	XS05G0264400	0.862821
XSUnG0225500	XS11G0097700	0.848312
XSUnG0225500	XS04G0151900	0.917579
XSUnG0225500	XS04G0234100	0.806779
XSUnG0225500	XS14G0017000	0.879963
XSUnG0225500	XSUnG0107300	0.877073
XSUnG0225500	XS05G0104700	0.831782
XSUnG0225500	XS05G0258700	0.880905
XSUnG0225500	XS13G0120600	0.829354
XSUnG0225500	XS14G0069300	0.90164
XSUnG0225500	XS01G0363100	0.854301
XSUnG0225500	XS07G0222000	0.91258
XSUnG0225500	XS06G0122800	0.937045
XSUnG0225500	XS10G0122100	0.954431
XSUnG0225500	XS06G0148800	0.915258
XSUnG0225500	XS09G0023500	0.839511
XSUnG0225500	XS06G0039700	0.855497
XSUnG0225500	XS06G0064900	0.836632
XSUnG0225500	XSUnG0143000	0.842053
XSUnG0225500	XS01G0228100	0.869497
XSUnG0225500	XS11G0179800	0.907865
XSUnG0225500	XS09G0218500	0.917627
XSUnG0225500	XS01G0383000	0.875014
XSUnG0225500	XS06G0094800	0.969718
XSUnG0225500	XS03G0202000	0.803376
XSUnG0225500	XS14G0007700	0.915172
XSUnG0225500	XS03G0245600	0.844622
XSUnG0225500	XS05G0049800	0.87426
XSUnG0225500	XS05G0058300	0.823103
XSUnG0225500	XSUnG0053700	0.956631
XSUnG0225500	XS10G0030700	0.810377
XSUnG0225500	XS02G0096100	0.846224
XSUnG0225500	XS14G0021500	0.938351
XSUnG0225500	XS01G0284700	0.848374
XSUnG0225500	XS06G0006500	0.854906
XSUnG0225500	XS05G0040600	0.87963
XSUnG0225500	XS08G0256900	0.885645
XSUnG0225500	XS13G0011400	0.835014
XSUnG0225500	XS03G0069200	0.835891
XSUnG0225500	XS01G0378400	0.975568
XSUnG0225500	XS07G0196100	0.861266
XSUnG0225500	XS11G0052500	0.962353
XSUnG0225500	XS01G0384000	0.85281
XSUnG0225500	XS13G0120700	0.869805
XSUnG0225500	XS10G0074200	0.837292
XS05G0035700	XS07G0051900	0.888901
XS05G0035700	XS10G0140100	0.809722
XS05G0035700	XS03G0201900	0.926586
XS05G0035700	XS02G0073500	0.953546
XS05G0035700	XS07G0262200	0.819023
XS05G0035700	XS03G0176700	0.873578
XS05G0035700	XS13G0163900	0.88835
XS05G0035700	XS11G0214400	0.906292
XS05G0035700	XS02G0103900	0.92466
XS05G0035700	XS07G0040000	0.817444
XS05G0035700	XS08G0046300	0.921756
XS05G0035700	XS01G0324000	0.946548
XS05G0035700	XS06G0006700	0.945309
XS05G0035700	XS10G0177600	0.884071
XS05G0035700	XS01G0359300	0.825974
XS05G0035700	XS08G0203300	0.82058
XS05G0035700	XS05G0153200	0.911594
XS05G0035700	XS07G0094600	0.856532
XS05G0035700	XS03G0161600	0.888155
XS05G0035700	XS07G0033800	0.8996
XS05G0035700	XS02G0157400	0.881066
XS05G0035700	XS09G0028700	0.846794
XS05G0035700	XS06G0165000	0.947815
XS05G0035700	XS04G0133900	0.939697
XS05G0035700	XS03G0318400	0.804349
XS05G0035700	XS12G0072300	0.807565
XS05G0035700	XS08G0019100	0.909955
XS05G0035700	XS13G0120800	0.866569
XS05G0035700	XS06G0048100	0.929024
XS05G0035700	XS02G0029200	0.907066
XS05G0035700	XS03G0023700	0.834268
XS05G0035700	XSUnG0221700	0.984289
XS05G0035700	XS14G0106200	0.875953
XS05G0035700	XS04G0079800	0.826839
XS05G0035700	XS07G0243200	0.876606
XS05G0035700	XS07G0261900	0.973084
XS05G0035700	XS06G0063900	0.967952
XS05G0035700	XS10G0093600	0.901078
XS05G0035700	XS03G0057800	0.894731
XS05G0035700	XS05G0020000	0.950949
XS05G0035700	XS06G0051600	0.939021
XS05G0035700	XS01G0315800	0.976587
XS05G0035700	XS08G0001700	0.907654
XS05G0035700	XS13G0066000	0.89763
XS05G0035700	XS06G0147900	0.964647
XS05G0035700	XS01G0331600	0.894999
XS05G0035700	XS12G0045100	0.903272
XS05G0035700	XS08G0146400	0.853746
XS05G0035700	XS01G0238800	0.940435
XS05G0035700	XS07G0072300	0.938151
XS05G0035700	XS14G0040600	0.892105
XS05G0035700	XS12G0065900	0.931228
XS05G0035700	XS01G0213800	0.947148
XS05G0035700	XS15G0015200	0.925613
XS05G0035700	XS10G0090900	0.820455
XS05G0035700	XS13G0243500	0.922564
XS05G0035700	XS14G0059400	0.945295
XS05G0035700	XS12G0125600	0.955183
XS05G0035700	XS01G0358600	0.803615
XS05G0035700	XS04G0231700	0.86129
XS05G0035700	XS06G0005000	0.865038
XS05G0035700	XS12G0221500	0.939215
XS05G0035700	XS01G0295400	0.965892
XS05G0035700	XSUnG0067800	0.952343
XS05G0035700	XS06G0151800	0.901372
XS05G0035700	XS07G0095700	0.951038
XS05G0035700	XS12G0116200	0.847531
XS05G0035700	XS11G0198200	0.834868
XS05G0035700	XSUnG0149500	0.812081
XS05G0035700	XS01G0341200	0.944668
XS05G0035700	XS12G0013000	0.942949
XS05G0035700	XS05G0130400	0.94373
XS05G0035700	XS09G0022000	0.83984
XS05G0035700	XS01G0356200	0.943825
XS05G0035700	XS06G0084600	0.921457
XS05G0035700	XS14G0070900	0.93331
XS05G0035700	XS10G0177300	0.846338
XS05G0035700	XS02G0097200	0.820954
XS05G0035700	XS03G0019500	0.820108
XS05G0035700	XS04G0004100	0.945527
XS05G0035700	XS07G0007100	0.877064
XS05G0035700	XS07G0027700	0.919188
XS05G0035700	XS13G0120300	0.94199
XS05G0035700	XS14G0092800	0.85977
XS05G0035700	XS07G0012400	0.947677
XS05G0035700	XS05G0253700	0.879798
XS05G0035700	XS03G0147200	0.917894
XS05G0035700	XS13G0062600	0.91071
XS05G0035700	XS01G0305100	0.89975
XS05G0035700	XS12G0015900	0.87814
XS05G0035700	XS14G0002500	0.915394
XS05G0035700	XS11G0010500	0.929224
XS05G0035700	XS08G0056400	0.904138
XS05G0035700	XS07G0001400	0.954836
XS05G0035700	XS08G0215600	0.948512
XS05G0035700	XS10G0174600	0.936074
XS05G0035700	XS12G0236800	0.945086
XS05G0035700	XS08G0238900	0.874574
XS05G0035700	XS03G0019600	0.889765
XS05G0035700	XS11G0215300	0.92013
XS05G0035700	XS02G0157100	0.837626
XS05G0035700	XS04G0165000	0.92855
XS05G0035700	XS07G0075700	0.952593
XS05G0035700	XS11G0188400	0.94926
XS05G0035700	XS11G0097700	0.867211
XS05G0035700	XS04G0151900	0.986634
XS05G0035700	XS14G0017000	0.859726
XS05G0035700	XSUnG0107300	0.88282
XS05G0035700	XS05G0104700	0.946395
XS05G0035700	XS05G0258700	0.886097
XS05G0035700	XS14G0069300	0.83906
XS05G0035700	XS01G0363100	0.855111
XS05G0035700	XS07G0222000	0.844901
XS05G0035700	XS06G0122800	0.942943
XS05G0035700	XS10G0122100	0.892052
XS05G0035700	XS06G0148800	0.973242
XS05G0035700	XS06G0064900	0.808699
XS05G0035700	XSUnG0143000	0.847888
XS05G0035700	XS01G0228100	0.852249
XS05G0035700	XS11G0179800	0.93123
XS05G0035700	XS09G0218500	0.942239
XS05G0035700	XSUnG0259700	0.864014
XS05G0035700	XS01G0383000	0.880116
XS05G0035700	XS06G0094800	0.956566
XS05G0035700	XS03G0202000	0.915872
XS05G0035700	XS14G0007700	0.940907
XS05G0035700	XS03G0245600	0.862698
XS05G0035700	XS05G0049800	0.832734
XS05G0035700	XS05G0058300	0.826065
XS05G0035700	XSUnG0053700	0.955803
XS05G0035700	XS12G0060700	0.874396
XS05G0035700	XS10G0030700	0.918423
XS05G0035700	XS02G0096100	0.937853
XS05G0035700	XS14G0021500	0.979769
XS05G0035700	XS01G0284700	0.939448
XS05G0035700	XS05G0040600	0.941232
XS05G0035700	XS08G0256900	0.804481
XS05G0035700	XSUnG0229600	0.851279
XS05G0035700	XS13G0011400	0.802951
XS05G0035700	XS01G0378400	0.934698
XS05G0035700	XS07G0196100	0.823884
XS05G0035700	XS13G0015400	0.859661
XS05G0035700	XS11G0052500	0.906418
XS05G0035700	XS01G0384000	0.879902
XS05G0035700	XS13G0120700	0.91673
XS05G0035700	XS10G0074200	0.927955
XS13G0135300	XS03G0176700	0.951565
XS13G0135300	XS03G0158700	0.835812
XS13G0135300	XS01G0376800	0.926784
XS13G0135300	XS13G0009700	0.949295
XS13G0135300	XS06G0006700	0.802413
XS13G0135300	XS08G0109100	0.815873
XS13G0135300	XS03G0161600	0.840911
XS13G0135300	XS07G0024600	0.840942
XS13G0135300	XS13G0120800	0.843281
XS13G0135300	XS07G0243200	0.848098
XS13G0135300	XS10G0093600	0.841818
XS13G0135300	XS12G0166900	0.959123
XS13G0135300	XS06G0078700	0.898399
XS13G0135300	XS01G0152900	0.933749
XS13G0135300	XS13G0066000	0.841698
XS13G0135300	XS01G0144000	0.81731
XS13G0135300	XS14G0040600	0.901511
XS13G0135300	XS11G0121400	0.830715
XS13G0135300	XS14G0021600	0.829645
XS13G0135300	XS06G0002500	0.925299
XS13G0135300	XS08G0200900	0.853646
XS13G0135300	XS06G0030900	0.863628
XS13G0135300	XS04G0029000	0.820321
XS13G0135300	XS10G0090900	0.959497
XS13G0135300	XS01G0295400	0.848679
XS13G0135300	XSUnG0149500	0.888082
XS13G0135300	XS05G0021800	0.865847
XS13G0135300	XS09G0022000	0.953647
XS13G0135300	XS02G0069200	0.806341
XS13G0135300	XS04G0004100	0.812019
XS13G0135300	XS05G0043000	0.812662
XS13G0135300	XS07G0129900	0.861458
XS13G0135300	XS03G0186900	0.86529
XS13G0135300	XS05G0050200	0.871755
XS13G0135300	XS06G0049400	0.841234
XS13G0135300	XS07G0115300	0.848533
XS13G0135300	XS13G0176400	0.844972
XS13G0135300	XS03G0019600	0.920427
XS13G0135300	XS03G0253200	0.827894
XS13G0135300	XS04G0165000	0.808513
XS13G0135300	XS10G0120300	0.83178
XS13G0135300	XS14G0017000	0.805004
XS13G0135300	XSUnG0107300	0.854612
XS13G0135300	XS05G0164600	0.928077
XS13G0135300	XS01G0122700	0.866707
XS13G0135300	XS10G0122100	0.836522
XS13G0135300	XS09G0023500	0.908626
XS13G0135300	XS08G0226600	0.876459
XS13G0135300	XS01G0275200	0.877452
XS13G0135300	XS06G0064900	0.902601
XS13G0135300	XSUnG0143000	0.907798
XS13G0135300	XS01G0376400	0.87494
XS13G0135300	XS05G0049800	0.86323
XS13G0135300	XSUnG0053700	0.824504
XS13G0135300	XS10G0037400	0.903179
XS13G0135300	XSUnG0229600	0.916318
XS13G0135300	XS02G0058000	0.905317
XS13G0135300	XS04G0232900	0.843982
XS13G0135300	XS11G0117600	0.826007
XS13G0135300	XSUnG0210500	0.801178
XS03G0176700	XS07G0051900	0.840181
XS03G0176700	XS02G0073500	0.848954
XS03G0176700	XS03G0158700	0.844608
XS03G0176700	XS02G0103900	0.900433
XS03G0176700	XS13G0009700	0.902056
XS03G0176700	XS01G0324000	0.818248
XS03G0176700	XS06G0006700	0.893681
XS03G0176700	XS08G0203300	0.895895
XS03G0176700	XS05G0153200	0.910456
XS03G0176700	XS12G0232600	0.813749
XS03G0176700	XS03G0161600	0.946276
XS03G0176700	XS03G0318400	0.818724
XS03G0176700	XS07G0024600	0.902811
XS03G0176700	XS13G0120800	0.915756
XS03G0176700	XS06G0048100	0.824986
XS03G0176700	XSUnG0221700	0.877686
XS03G0176700	XS14G0106200	0.86494
XS03G0176700	XS04G0079800	0.821368
XS03G0176700	XS07G0243200	0.923094
XS03G0176700	XS07G0261900	0.810079
XS03G0176700	XS06G0063900	0.869218
XS03G0176700	XS10G0093600	0.910246
XS03G0176700	XS09G0218100	0.840136
XS03G0176700	XS12G0166900	0.941217
XS03G0176700	XS06G0078700	0.915152
XS03G0176700	XS05G0020000	0.817244
XS03G0176700	XS01G0315800	0.820831
XS03G0176700	XS01G0152900	0.93522
XS03G0176700	XS13G0066000	0.891541
XS03G0176700	XS13G0141400	0.855121
XS03G0176700	XS05G0104400	0.806508
XS03G0176700	XS12G0045100	0.836958
XS03G0176700	XS08G0146400	0.885715
XS03G0176700	XS07G0072300	0.83958
XS03G0176700	XS14G0040600	0.976276
XS03G0176700	XS14G0021600	0.881515
XS03G0176700	XS06G0002500	0.914242
XS03G0176700	XS08G0200900	0.824706
XS03G0176700	XS04G0029000	0.865677
XS03G0176700	XS10G0090900	0.95822
XS03G0176700	XS12G0125600	0.819715
XS03G0176700	XS01G0295400	0.95256
XS03G0176700	XSUnG0067800	0.839363
XS03G0176700	XS06G0151800	0.846072
XS03G0176700	XSUnG0149500	0.881164
XS03G0176700	XS01G0341200	0.807298
XS03G0176700	XS05G0021800	0.839873
XS03G0176700	XS12G0013000	0.824576
XS03G0176700	XS05G0130400	0.831785
XS03G0176700	XS09G0022000	0.955732
XS03G0176700	XS01G0356200	0.915237
XS03G0176700	XS06G0084600	0.805164
XS03G0176700	XS04G0004100	0.930362
XS03G0176700	XS07G0027700	0.844717
XS03G0176700	XS14G0092800	0.840276
XS03G0176700	XS07G0129900	0.846292
XS03G0176700	XS03G0186900	0.810117
XS03G0176700	XS05G0050200	0.895763
XS03G0176700	XS03G0147200	0.800954
XS03G0176700	XS13G0062600	0.845948
XS03G0176700	XS01G0305100	0.824934
XS03G0176700	XS14G0002500	0.861907
XS03G0176700	XS13G0176400	0.823616
XS03G0176700	XS11G0010500	0.867738
XS03G0176700	XS07G0001400	0.904317
XS03G0176700	XS08G0215600	0.838216
XS03G0176700	XS03G0019600	0.961333
XS03G0176700	XS04G0165000	0.918735
XS03G0176700	XS10G0120300	0.814989
XS03G0176700	XS11G0188400	0.856279
XS03G0176700	XS04G0151900	0.812051
XS03G0176700	XS04G0234100	0.815142
XS03G0176700	XS14G0017000	0.85257
XS03G0176700	XSUnG0107300	0.941193
XS03G0176700	XS05G0164600	0.857818
XS03G0176700	XS05G0258700	0.814988
XS03G0176700	XS14G0069300	0.862395
XS03G0176700	XS01G0363100	0.86102
XS03G0176700	XS06G0122800	0.870184
XS03G0176700	XS01G0122700	0.851834
XS03G0176700	XS10G0122100	0.879618
XS03G0176700	XS06G0148800	0.806181
XS03G0176700	XS09G0023500	0.917663
XS03G0176700	XS08G0226600	0.901835
XS03G0176700	XS01G0275200	0.911881
XS03G0176700	XS06G0064900	0.911114
XS03G0176700	XSUnG0143000	0.965106
XS03G0176700	XS01G0228100	0.801234
XS03G0176700	XS11G0179800	0.86542
XS03G0176700	XS09G0218500	0.810067
XS03G0176700	XS06G0094800	0.867866
XS03G0176700	XS14G0007700	0.803871
XS03G0176700	XS05G0049800	0.933622
XS03G0176700	XSUnG0053700	0.912048
XS03G0176700	XS10G0030700	0.862814
XS03G0176700	XS14G0021500	0.904003
XS03G0176700	XS10G0037400	0.899948
XS03G0176700	XSUnG0229600	0.946887
XS03G0176700	XS01G0378400	0.866602
XS03G0176700	XS07G0196100	0.812259
XS03G0176700	XS02G0058000	0.813231
XS03G0176700	XS04G0232900	0.804745
XS03G0176700	XS11G0117600	0.819945
XS03G0176700	XS11G0052500	0.837695
XS03G0176700	XS01G0384000	0.871761
XS11G0214400	XS07G0051900	0.947368
XS11G0214400	XS02G0073500	0.862373
XS11G0214400	XS02G0103900	0.900363
XS11G0214400	XS07G0040000	0.833783
XS11G0214400	XS01G0324000	0.959173
XS11G0214400	XS06G0006700	0.87657
XS11G0214400	XS01G0359300	0.951045
XS11G0214400	XS09G0028700	0.968702
XS11G0214400	XS06G0165000	0.814814
XS11G0214400	XS01G0328600	0.810543
XS11G0214400	XS08G0019100	0.810224
XS11G0214400	XS08G0193600	0.853308
XS11G0214400	XS06G0048100	0.800575
XS11G0214400	XS03G0023700	0.897019
XS11G0214400	XSUnG0221700	0.902699
XS11G0214400	XS07G0243200	0.826645
XS11G0214400	XS07G0261900	0.888293
XS11G0214400	XS07G0225600	0.841407
XS11G0214400	XS06G0063900	0.934863
XS11G0214400	XS10G0093600	0.901584
XS11G0214400	XS05G0020000	0.859986
XS11G0214400	XS06G0051600	0.813133
XS11G0214400	XS01G0315800	0.923906
XS11G0214400	XS08G0001700	0.89162
XS11G0214400	XS13G0066000	0.948031
XS11G0214400	XS06G0147900	0.833251
XS11G0214400	XS01G0331600	0.953696
XS11G0214400	XS01G0238800	0.803658
XS11G0214400	XS07G0072300	0.935348
XS11G0214400	XS12G0065900	0.816446
XS11G0214400	XS01G0385800	0.851896
XS11G0214400	XS01G0213800	0.818585
XS11G0214400	XS14G0059400	0.80727
XS11G0214400	XS12G0125600	0.87699
XS11G0214400	XS04G0231700	0.971657
XS11G0214400	XS01G0295400	0.863633
XS11G0214400	XSUnG0067800	0.816619
XS11G0214400	XS06G0151800	0.916233
XS11G0214400	XS07G0095700	0.850258
XS11G0214400	XS11G0198200	0.917794
XS11G0214400	XSUnG0149500	0.877693
XS11G0214400	XS06G0050500	0.894288
XS11G0214400	XS05G0130400	0.844916
XS11G0214400	XS09G0022000	0.815327
XS11G0214400	XS01G0356200	0.88938
XS11G0214400	XS06G0084600	0.983952
XS11G0214400	XS02G0097200	0.874611
XS11G0214400	XS07G0007100	0.908084
XS11G0214400	XS07G0027700	0.860192
XS11G0214400	XS13G0120300	0.823195
XS11G0214400	XS01G0241900	0.808841
XS11G0214400	XS07G0012400	0.80895
XS11G0214400	XS03G0147200	0.815152
XS11G0214400	XS06G0049400	0.830465
XS11G0214400	XS07G0047900	0.829209
XS11G0214400	XS13G0062600	0.954934
XS11G0214400	XS01G0305100	0.946808
XS11G0214400	XS12G0015900	0.84271
XS11G0214400	XS14G0002500	0.885151
XS11G0214400	XS11G0010500	0.819957
XS11G0214400	XS01G0049200	0.820345
XS11G0214400	XS13G0014600	0.801434
XS11G0214400	XS08G0056400	0.852502
XS11G0214400	XS07G0001400	0.895101
XS11G0214400	XS08G0215600	0.939743
XS11G0214400	XS12G0236800	0.824763
XS11G0214400	XS08G0160700	0.871549
XS11G0214400	XS03G0019600	0.848062
XS11G0214400	XS04G0165000	0.82749
XS11G0214400	XS10G0120300	0.881054
XS11G0214400	XS07G0075700	0.853891
XS11G0214400	XS11G0188400	0.917461
XS11G0214400	XS05G0264400	0.860239
XS11G0214400	XS11G0097700	0.879359
XS11G0214400	XS04G0151900	0.877098
XS11G0214400	XS14G0017000	0.892586
XS11G0214400	XS14G0022200	0.856793
XS11G0214400	XS05G0258700	0.801505
XS11G0214400	XS13G0120600	0.892791
XS11G0214400	XS14G0069300	0.825232
XS11G0214400	XS01G0363100	0.830019
XS11G0214400	XS07G0222000	0.921418
XS11G0214400	XS06G0122800	0.875022
XS11G0214400	XS10G0122100	0.958689
XS11G0214400	XS06G0148800	0.868433
XS11G0214400	XS06G0039700	0.876605
XS11G0214400	XS11G0179800	0.82533
XS11G0214400	XS09G0218500	0.864105
XS11G0214400	XS06G0094800	0.946096
XS11G0214400	XS14G0007700	0.858455
XS11G0214400	XS03G0245600	0.878656
XS11G0214400	XSUnG0053700	0.912307
XS11G0214400	XS02G0096100	0.823859
XS11G0214400	XS14G0021500	0.87825
XS11G0214400	XS06G0006500	0.922713
XS11G0214400	XS05G0040600	0.817724
XS11G0214400	XS08G0256900	0.95751
XS11G0214400	XS03G0069200	0.87308
XS11G0214400	XS01G0378400	0.939744
XS11G0214400	XS11G0052500	0.981603
XS11G0214400	XS13G0120700	0.817446
XS02G0103900	XS07G0051900	0.96661
XS02G0103900	XS10G0140100	0.874456
XS02G0103900	XS03G0201900	0.822468
XS02G0103900	XS02G0073500	0.922482
XS02G0103900	XS09G0230700	0.903638
XS02G0103900	XS07G0040000	0.825405
XS02G0103900	XS08G0046300	0.829727
XS02G0103900	XS01G0324000	0.887401
XS02G0103900	XS06G0006700	0.870333
XS02G0103900	XS01G0359300	0.863086
XS02G0103900	XS08G0203300	0.937642
XS02G0103900	XS05G0153200	0.849359
XS02G0103900	XS07G0094600	0.939177
XS02G0103900	XS03G0161600	0.93261
XS02G0103900	XS09G0028700	0.90809
XS02G0103900	XS06G0165000	0.895059
XS02G0103900	XS04G0133900	0.864953
XS02G0103900	XS12G0072300	0.924351
XS02G0103900	XS08G0019100	0.930303
XS02G0103900	XS06G0048100	0.912338
XS02G0103900	XS03G0023700	0.803477
XS02G0103900	XSUnG0221700	0.944367
XS02G0103900	XS04G0079800	0.886515
XS02G0103900	XS07G0243200	0.851351
XS02G0103900	XS07G0261900	0.934283
XS02G0103900	XS06G0063900	0.945097
XS02G0103900	XS10G0093600	0.947597
XS02G0103900	XS09G0218100	0.819538
XS02G0103900	XS06G0078700	0.86936
XS02G0103900	XS05G0020000	0.901176
XS02G0103900	XS06G0051600	0.9203
XS02G0103900	XS01G0315800	0.938807
XS02G0103900	XS08G0001700	0.927567
XS02G0103900	XS13G0066000	0.883395
XS02G0103900	XS11G0198400	0.867728
XS02G0103900	XS06G0147900	0.874164
XS02G0103900	XS01G0331600	0.823934
XS02G0103900	XS12G0045100	0.81805
XS02G0103900	XS01G0238800	0.889374
XS02G0103900	XS07G0072300	0.941663
XS02G0103900	XS14G0040600	0.84775
XS02G0103900	XS12G0065900	0.811904
XS02G0103900	XS06G0002500	0.807093
XS02G0103900	XS08G0200900	0.813773
XS02G0103900	XS04G0029000	0.802222
XS02G0103900	XS01G0213800	0.883317
XS02G0103900	XS15G0015200	0.821634
XS02G0103900	XS10G0090900	0.820455
XS02G0103900	XS13G0243500	0.904364
XS02G0103900	XS14G0059400	0.895916
XS02G0103900	XS12G0125600	0.952747
XS02G0103900	XS01G0358600	0.890425
XS02G0103900	XS04G0231700	0.914718
XS02G0103900	XS06G0005000	0.94334
XS02G0103900	XS12G0221500	0.870255
XS02G0103900	XS01G0295400	0.941969
XS02G0103900	XSUnG0067800	0.87977
XS02G0103900	XS06G0151800	0.865628
XS02G0103900	XS07G0095700	0.921314
XS02G0103900	XS12G0116200	0.938012
XS02G0103900	XS11G0198200	0.8247
XS02G0103900	XSUnG0149500	0.870191
XS02G0103900	XS12G0238100	0.81055
XS02G0103900	XS12G0013000	0.848414
XS02G0103900	XS05G0130400	0.957887
XS02G0103900	XS09G0022000	0.897798
XS02G0103900	XS01G0356200	0.993269
XS02G0103900	XS06G0084600	0.919915
XS02G0103900	XS14G0070900	0.846626
XS02G0103900	XS07G0096100	0.800188
XS02G0103900	XS04G0004100	0.890457
XS02G0103900	XS13G0120300	0.921265
XS02G0103900	XS14G0092800	0.907169
XS02G0103900	XS01G0241900	0.823747
XS02G0103900	XS07G0012400	0.84128
XS02G0103900	XS05G0253700	0.901918
XS02G0103900	XS05G0050200	0.865172
XS02G0103900	XS03G0147200	0.943226
XS02G0103900	XS13G0062600	0.953423
XS02G0103900	XS01G0305100	0.858758
XS02G0103900	XS14G0002500	0.974416
XS02G0103900	XS11G0010500	0.912543
XS02G0103900	XS07G0001400	0.957976
XS02G0103900	XS08G0215600	0.902012
XS02G0103900	XS10G0174600	0.828174
XS02G0103900	XS12G0236800	0.921211
XS02G0103900	XS03G0019600	0.897164
XS02G0103900	XS02G0157100	0.832856
XS02G0103900	XS04G0165000	0.900188
XS02G0103900	XS07G0075700	0.919032
XS02G0103900	XS11G0188400	0.936815
XS02G0103900	XS06G0059900	0.901749
XS02G0103900	XS04G0151900	0.903221
XS02G0103900	XS04G0234100	0.830347
XS02G0103900	XS14G0017000	0.907293
XS02G0103900	XSUnG0107300	0.905109
XS02G0103900	XS05G0104700	0.836434
XS02G0103900	XS05G0258700	0.952435
XS02G0103900	XS14G0069300	0.923356
XS02G0103900	XS07G0222000	0.847151
XS02G0103900	XS06G0122800	0.981491
XS02G0103900	XS10G0122100	0.920255
XS02G0103900	XS10G0202400	0.858779
XS02G0103900	XS06G0148800	0.922931
XS02G0103900	XS06G0039700	0.828578
XS02G0103900	XSUnG0143000	0.864457
XS02G0103900	XS01G0228100	0.941477
XS02G0103900	XS11G0179800	0.95448
XS02G0103900	XS09G0218500	0.95779
XS02G0103900	XS01G0383000	0.824075
XS02G0103900	XS06G0094800	0.949822
XS02G0103900	XS03G0202000	0.800172
XS02G0103900	XS14G0007700	0.949635
XS02G0103900	XS05G0049800	0.933525
XS02G0103900	XSUnG0053700	0.931269
XS02G0103900	XS10G0030700	0.854916
XS02G0103900	XS02G0096100	0.825557
XS02G0103900	XS14G0021500	0.921172
XS02G0103900	XS01G0284700	0.873289
XS02G0103900	XS05G0040600	0.915042
XS02G0103900	XSUnG0229600	0.816786
XS02G0103900	XS13G0011400	0.928142
XS02G0103900	XS11G0081600	0.873403
XS02G0103900	XS01G0378400	0.880856
XS02G0103900	XS07G0196100	0.93533
XS02G0103900	XS11G0052500	0.923237
XS02G0103900	XS01G0384000	0.88975
XS02G0103900	XS13G0120700	0.876
XS02G0103900	XS10G0074200	0.877253
XS13G0009700	XS12G0232600	0.869776
XS13G0009700	XS03G0161600	0.823043
XS13G0009700	XS07G0024600	0.833454
XS13G0009700	XS13G0120800	0.846209
XS13G0009700	XS07G0243200	0.865162
XS13G0009700	XS10G0093600	0.825314
XS13G0009700	XS12G0166900	0.967978
XS13G0009700	XS06G0078700	0.85392
XS13G0009700	XS01G0152900	0.878283
XS13G0009700	XS13G0066000	0.827117
XS13G0009700	XS13G0141400	0.836495
XS13G0009700	XS01G0144000	0.82347
XS13G0009700	XS12G0045100	0.82501
XS13G0009700	XS14G0040600	0.875148
XS13G0009700	XS14G0021600	0.877682
XS13G0009700	XS06G0002500	0.961624
XS13G0009700	XS08G0200900	0.884223
XS13G0009700	XS06G0030900	0.822941
XS13G0009700	XS04G0029000	0.885156
XS13G0009700	XS10G0090900	0.965285
XS13G0009700	XS01G0295400	0.8258
XS13G0009700	XSUnG0149500	0.845885
XS13G0009700	XS05G0021800	0.904581
XS13G0009700	XS09G0022000	0.94673
XS13G0009700	XS02G0069200	0.849054
XS13G0009700	XS03G0186900	0.894554
XS13G0009700	XS05G0050200	0.853835
XS13G0009700	XS06G0049400	0.826523
XS13G0009700	XS07G0115300	0.852665
XS13G0009700	XS03G0019600	0.922879
XS13G0009700	XS03G0253200	0.826795
XS13G0009700	XS03G0020100	0.810293
XS13G0009700	XS14G0017000	0.802381
XS13G0009700	XSUnG0107300	0.878876
XS13G0009700	XS05G0164600	0.852258
XS13G0009700	XS01G0363100	0.838541
XS13G0009700	XS01G0122700	0.931213
XS13G0009700	XS10G0122100	0.818526
XS13G0009700	XS09G0023500	0.820836
XS13G0009700	XS08G0226600	0.903315
XS13G0009700	XS01G0275200	0.907288
XS13G0009700	XS06G0064900	0.915475
XS13G0009700	XSUnG0143000	0.873074
XS13G0009700	XS01G0212400	0.833024
XS13G0009700	XSUnG0053700	0.807328
XS13G0009700	XS10G0037400	0.928498
XS13G0009700	XSUnG0229600	0.929992
XS13G0009700	XS14G0126900	0.853352
XS13G0009700	XS02G0058000	0.959032
XS13G0009700	XS04G0232900	0.849925
XS13G0009700	XS11G0117600	0.810839
XS06G0006700	XS07G0051900	0.841174
XS06G0006700	XS03G0201900	0.824277
XS06G0006700	XS02G0073500	0.926981
XS06G0006700	XS07G0040000	0.833934
XS06G0006700	XS05G0153200	0.853824
XS06G0006700	XS03G0161600	0.854028
XS06G0006700	XS07G0033800	0.848532
XS06G0006700	XS09G0028700	0.808598
XS06G0006700	XS06G0165000	0.856397
XS06G0006700	XS04G0133900	0.850144
XS06G0006700	XS03G0318400	0.892098
XS06G0006700	XS07G0024600	0.865603
XS06G0006700	XS03G0219200	0.854366
XS06G0006700	XS08G0019100	0.846835
XS06G0006700	XS13G0120800	0.878589
XS06G0006700	XS06G0048100	0.865822
XS06G0006700	XS02G0029200	0.882955
XS06G0006700	XS03G0023700	0.807275
XS06G0006700	XSUnG0221700	0.953829
XS06G0006700	XS14G0106200	0.868276
XS06G0006700	XS04G0079800	0.81427
XS06G0006700	XS07G0243200	0.891775
XS06G0006700	XS07G0261900	0.914249
XS06G0006700	XS06G0063900	0.877637
XS06G0006700	XS10G0093600	0.912922
XS06G0006700	XS03G0057800	0.83459
XS06G0006700	XS05G0020000	0.885695
XS06G0006700	XS06G0051600	0.855461
XS06G0006700	XS01G0315800	0.901502
XS06G0006700	XS01G0152900	0.81893
XS06G0006700	XS13G0066000	0.931091
XS06G0006700	XS13G0141400	0.836076
XS06G0006700	XS06G0147900	0.903357
XS06G0006700	XS01G0331600	0.860702
XS06G0006700	XS12G0045100	0.894272
XS06G0006700	XS08G0146400	0.879938
XS06G0006700	XS01G0238800	0.84978
XS06G0006700	XS07G0072300	0.890651
XS06G0006700	XS14G0040600	0.898256
XS06G0006700	XS12G0065900	0.832533
XS06G0006700	XS06G0002500	0.826869
XS06G0006700	XS08G0200900	0.831845
XS06G0006700	XS01G0213800	0.855153
XS06G0006700	XS15G0015200	0.832746
XS06G0006700	XS10G0090900	0.870703
XS06G0006700	XS14G0059400	0.840455
XS06G0006700	XS12G0125600	0.89021
XS06G0006700	XS12G0221500	0.845953
XS06G0006700	XS01G0295400	0.94002
XS06G0006700	XSUnG0067800	0.920933
XS06G0006700	XS06G0151800	0.864779
XS06G0006700	XS07G0095700	0.846316
XS06G0006700	XS11G0198200	0.833212
XS06G0006700	XSUnG0149500	0.851269
XS06G0006700	XS01G0341200	0.867629
XS06G0006700	XS12G0013000	0.865963
XS06G0006700	XS05G0130400	0.868373
XS06G0006700	XS09G0022000	0.869137
XS06G0006700	XS01G0356200	0.882408
XS06G0006700	XS06G0084600	0.871378
XS06G0006700	XS14G0070900	0.840049
XS06G0006700	XS10G0177300	0.856426
XS06G0006700	XS03G0019500	0.800855
XS06G0006700	XS04G0004100	0.932176
XS06G0006700	XS07G0007100	0.802753
XS06G0006700	XS07G0027700	0.938343
XS06G0006700	XS13G0120300	0.865737
XS06G0006700	XS14G0092800	0.816867
XS06G0006700	XS03G0186900	0.84186
XS06G0006700	XS07G0012400	0.856249
XS06G0006700	XS03G0147200	0.839051
XS06G0006700	XS13G0062600	0.902412
XS06G0006700	XS01G0305100	0.885135
XS06G0006700	XS12G0015900	0.846468
XS06G0006700	XS14G0002500	0.864891
XS06G0006700	XS11G0010500	0.921941
XS06G0006700	XS08G0056400	0.866672
XS06G0006700	XS07G0001400	0.887866
XS06G0006700	XS08G0215600	0.94309
XS06G0006700	XS10G0174600	0.833873
XS06G0006700	XS12G0236800	0.862417
XS06G0006700	XS03G0019600	0.945768
XS06G0006700	XS11G0215300	0.87367
XS06G0006700	XS04G0165000	0.948744
XS06G0006700	XS10G0120300	0.815916
XS06G0006700	XS07G0075700	0.859023
XS06G0006700	XS11G0188400	0.926635
XS06G0006700	XS07G0075800	0.805254
XS06G0006700	XS11G0097700	0.862697
XS06G0006700	XS04G0151900	0.924421
XS06G0006700	XS04G0234100	0.850652
XS06G0006700	XS14G0017000	0.809449
XS06G0006700	XSUnG0107300	0.870444
XS06G0006700	XS05G0104700	0.896815
XS06G0006700	XS05G0258700	0.824579
XS06G0006700	XS14G0069300	0.845605
XS06G0006700	XS01G0363100	0.839194
XS06G0006700	XS07G0222000	0.861375
XS06G0006700	XS06G0122800	0.879365
XS06G0006700	XS01G0122700	0.825164
XS06G0006700	XS10G0122100	0.881101
XS06G0006700	XS06G0148800	0.915066
XS06G0006700	XS09G0023500	0.880521
XS06G0006700	XS08G0226600	0.872684
XS06G0006700	XS06G0039700	0.808266
XS06G0006700	XS01G0275200	0.873207
XS06G0006700	XS06G0064900	0.859075
XS06G0006700	XSUnG0143000	0.913321
XS06G0006700	XS11G0179800	0.881365
XS06G0006700	XS09G0218500	0.87051
XS06G0006700	XS01G0383000	0.88768
XS06G0006700	XS06G0094800	0.916925
XS06G0006700	XS03G0202000	0.825574
XS06G0006700	XS14G0007700	0.869501
XS06G0006700	XS03G0245600	0.863643
XS06G0006700	XS05G0049800	0.865104
XS06G0006700	XSUnG0053700	0.956396
XS06G0006700	XS12G0060700	0.846334
XS06G0006700	XS10G0030700	0.838677
XS06G0006700	XS02G0096100	0.852047
XS06G0006700	XS14G0021500	0.942794
XS06G0006700	XS01G0284700	0.848492
XS06G0006700	XS05G0040600	0.856162
XS06G0006700	XSUnG0229600	0.882904
XS06G0006700	XS01G0378400	0.953672
XS06G0006700	XS11G0052500	0.87818
XS06G0006700	XS01G0384000	0.89906
XS06G0006700	XS13G0120700	0.887819
XS06G0006700	XS10G0074200	0.832234
XS08G0203300	XS07G0051900	0.90912
XS08G0203300	XS10G0140100	0.918642
XS08G0203300	XS02G0073500	0.876639
XS08G0203300	XS09G0230700	0.954268
XS08G0203300	XS05G0153200	0.817386
XS08G0203300	XS07G0094600	0.936533
XS08G0203300	XS03G0161600	0.961203
XS08G0203300	XS06G0165000	0.811082
XS08G0203300	XS12G0072300	0.942828
XS08G0203300	XS07G0024600	0.852248
XS08G0203300	XS08G0019100	0.899345
XS08G0203300	XS06G0048100	0.870609
XS08G0203300	XSUnG0221700	0.861705
XS08G0203300	XS04G0079800	0.940333
XS08G0203300	XS07G0243200	0.868952
XS08G0203300	XS07G0261900	0.824372
XS08G0203300	XS06G0063900	0.821823
XS08G0203300	XS10G0093600	0.916182
XS08G0203300	XS09G0218100	0.872367
XS08G0203300	XS06G0078700	0.823089
XS08G0203300	XS05G0020000	0.834638
XS08G0203300	XS06G0051600	0.856374
XS08G0203300	XS01G0315800	0.834033
XS08G0203300	XS08G0001700	0.824682
XS08G0203300	XS13G0066000	0.801875
XS08G0203300	XS01G0283000	0.853714
XS08G0203300	XS11G0198400	0.926749
XS08G0203300	XS11G0215200	0.856366
XS08G0203300	XS01G0238800	0.804507
XS08G0203300	XS07G0072300	0.851674
XS08G0203300	XS14G0040600	0.845923
XS08G0203300	XS14G0021600	0.837744
XS08G0203300	XS06G0002500	0.806591
XS08G0203300	XS04G0029000	0.820538
XS08G0203300	XS13G0243500	0.852182
XS08G0203300	XS14G0059400	0.825481
XS08G0203300	XS12G0125600	0.887306
XS08G0203300	XS03G0247400	0.848253
XS08G0203300	XS01G0358600	0.930599
XS08G0203300	XS06G0005000	0.935903
XS08G0203300	XS01G0295400	0.889562
XS08G0203300	XSUnG0067800	0.827775
XS08G0203300	XS06G0151800	0.818378
XS08G0203300	XS07G0095700	0.846608
XS08G0203300	XS12G0116200	0.942018
XS08G0203300	XSUnG0149500	0.80732
XS08G0203300	XS03G0231300	0.890707
XS08G0203300	XS12G0013000	0.813629
XS08G0203300	XS05G0130400	0.903644
XS08G0203300	XS09G0022000	0.859535
XS08G0203300	XS01G0356200	0.934987
XS08G0203300	XS07G0096100	0.866326
[truncated: 13,244 more rows]

## Sheet: Supplementary Table 7
Supplementary Table 7. Data (node pairs and PCC values) for regenerating the TO-GCN subnetwork related to fatty acid biosynthesis in leaf.
Source geneID	Target geneID	PCC
XS04G0029500	XS13G0036300	0.858903
XS07G0101800	XS04G0208000	0.854478
XS07G0101800	XS12G0058100	0.868174
XS12G0241600	XS15G0055900	0.863382
XS08G0226600	XS05G0040600	0.859555
XS15G0091500	XS01G0384000	0.878746
XS02G0287800	XS12G0071700	0.85425
XS09G0085200	XS02G0054100	0.885433
XS09G0085200	XSUnG0010800	0.860063
XS11G0081600	XS14G0070900	0.911354
XS02G0173800	XS08G0243200	0.851993
XS02G0173800	XS05G0102000	0.899331
XS06G0049400	XS06G0091600	0.857446
XS06G0049400	XS06G0122800	0.85367
XS10G0212200	XS03G0307200	0.871197
XS08G0134000	XS09G0228200	0.859125
XS01G0117800	XS01G0378400	0.906874
XS01G0117800	XS05G0264400	0.885684
XS12G0167700	XS11G0124000	0.908619
XS12G0216300	XS07G0039100	0.872057
XS06G0084600	XSUnG0119800	0.855051
XS06G0050500	XS06G0039700	0.852293
XS06G0050500	XS06G0167000	0.85333
XS12G0116200	XS13G0196100	0.881335
XS02G0034900	XS04G0107900	0.879586
XS10G0158800	XS06G0091600	0.851761
XS05G0123400	XS01G0111400	0.871231
XS06G0016100	XS01G0287400	0.870256
XS08G0250600	XS13G0203700	0.854074
XS02G0057100	XS10G0063900	0.851529
XS06G0167000	XS07G0027700	0.861805
XS06G0167000	XS11G0198300	0.859561
XS07G0157100	XS12G0238100	0.857116
XS03G0259200	XS01G0378400	0.859671
XS03G0259200	XS04G0234100	0.853799
XS04G0081800	XS04G0266600	0.888641
XS04G0081800	XS01G0406400	0.915714
XS03G0296800	XS08G0232100	0.894344
XS03G0296800	XS03G0296900	0.892121
XS13G0059900	XS01G0288700	0.853702
XS13G0059900	XS07G0075700	0.860264
XS13G0059900	XS12G0236800	0.877309
XS13G0118900	XS01G0114700	0.85306
XS04G0029000	XS12G0179700	0.880434
XS04G0029000	XS01G0344000	0.907769
XS04G0029000	XS13G0035300	0.866168
XS07G0006100	XS01G0117800	0.897064
XS08G0200900	XS08G0132100	0.867182
XS12G0024100	XS05G0164600	0.873571
XS03G0223300	XSUnG0045500	0.890416
XS03G0223300	XS07G0115300	0.884848
XS04G0205900	XS05G0040600	0.852752
XS04G0205900	XS04G0154800	0.935369
XS04G0205900	XS01G0383000	0.906342
XS04G0205900	XS06G0059900	0.907029
XS02G0057300	XS14G0071700	0.876825
XS04G0107900	XS04G0203300	0.881186
XS06G0147900	XS04G0107900	0.894173
XS06G0147900	XS01G0025200	0.877332
XS05G0239300	XS09G0228200	0.902487
XSUnG0200500	XS10G0209700	0.87307
XS13G0196100	XS13G0057200	0.862555
XS13G0196100	XS13G0203700	0.858495
XS13G0196100	XSUnG0096000	0.884825
XS11G0229200	XS09G0175500	0.897533
XS11G0229200	XS04G0251900	0.922464
XS11G0229200	XS13G0196100	0.861542
XS11G0229200	XS02G0054100	0.879408
XS11G0229200	XSUnG0010800	0.86306
XS11G0229200	XSUnG0096000	0.870539
XS01G0406400	XS04G0266600	0.873556
XS12G0016300	XS07G0057300	0.897813
XS11G0097700	XS12G0157200	0.880215
XS11G0097700	XS13G0184800	0.861395
XS11G0097700	XS09G0156600	0.860165
XS05G0144400	XS12G0157200	0.906725
XS05G0144400	XS13G0184800	0.875132
XS05G0144400	XS11G0097700	0.934648
XS05G0144400	XS03G0020100	0.914779
XS05G0144400	XS10G0044300	0.877316
XS05G0144400	XS04G0128300	0.885495
XS05G0144400	XS07G0006100	0.852803
XS05G0144400	XS01G0241900	0.924417
XS05G0144400	XS01G0113100	0.884698
XS05G0144400	XS10G0090900	0.904322
XS14G0082100	XS12G0157200	0.890197
XS14G0082100	XS11G0097700	0.920646
XS14G0082100	XS04G0128300	0.886211
XS14G0082100	XS05G0144400	0.925089
XS09G0120100	XS11G0041200	0.859128
XS04G0288400	XS07G0072300	0.868625
XS04G0288400	XS05G0066200	0.862239
XS01G0025200	XS10G0163600	0.870835
XS01G0025200	XS13G0052300	0.854016
XS01G0025200	XS07G0093100	0.897269
XS01G0025200	XS05G0008800	0.861991
XS01G0025200	XSUnG0097700	0.9183
XS01G0025200	XS09G0241100	0.859298
XS01G0025200	XS04G0071600	0.884613
XS05G0020000	XSUnG0087000	0.860765
XSUnG0208500	XS12G0041600	0.891052
XS12G0037600	XS02G0138600	0.85207
XS01G0026600	XS01G0341200	0.866571
XS13G0182900	XS15G0003000	0.882848
XS02G0038800	XSUnG0107300	0.873325
XS10G0134900	XS01G0122700	0.851424
XS06G0063900	XS04G0128300	0.850108
XS06G0063900	XS02G0223300	0.853048
XS04G0208000	XS13G0036300	0.85643
XS13G0034300	XS13G0036300	0.884243
XS04G0257300	XS13G0036300	0.954795
XS04G0257300	XS04G0208000	0.894326
XS04G0257300	XS13G0034300	0.864534
XS04G0257300	XS04G0169900	0.856631
XS04G0257300	XS12G0043000	0.855066
XS12G0071700	XS01G0288700	0.859946
XS07G0225800	XS01G0288700	0.850443
XS07G0225600	XS01G0288700	0.863453
XS07G0225600	XS12G0071700	0.860583
XS07G0225600	XS07G0225800	0.953185
XS07G0225600	XS14G0017000	0.874217
XS07G0225600	XS10G0120300	0.859911
XS01G0403900	XS13G0079700	0.870178
XS01G0403900	XS12G0244200	0.904837
XS01G0403900	XS13G0014600	0.854101
XS01G0403900	XS01G0232500	0.875623
XS01G0403900	XS03G0218400	0.850893
XS10G0177300	XS13G0079700	0.876651
XS13G0226800	XS14G0045400	0.862709
XS13G0226800	XS12G0006400	0.893348
XS11G0047200	XS01G0391500	0.850464
XS06G0048100	XS05G0130400	0.853173
XS03G0096200	XSUnG0259700	0.923407
XS10G0174600	XS12G0034800	0.860007
XS10G0167200	XS10G0174600	0.856723
XS10G0167200	XS13G0171400	0.872262
XS01G0190600	XS04G0003400	0.865575
XS01G0190600	XS08G0243200	0.854523
XS01G0190600	XS08G0099500	0.850441
XS01G0190600	XSUnG0182900	0.857905
XS01G0190600	XS01G0287400	0.884527
XS01G0190600	XS07G0051900	0.854755
XS13G0039400	XS07G0216300	0.933923
XS05G0060900	XS15G0055900	0.892443
XS05G0060900	XS13G0059900	0.88353
XS05G0060900	XS01G0358600	0.856013
XS15G0015200	XS15G0055900	0.893237
XS15G0015200	XS01G0284700	0.857216
XS15G0015200	XS10G0027300	0.862968
XS15G0015200	XS13G0059900	0.922188
XS15G0015200	XS13G0176400	0.852379
XS15G0015200	XS13G0061200	0.855851
XS15G0015200	XS01G0358600	0.866993
XS15G0015200	XS05G0060900	0.91804
XS13G0036300	XS04G0169900	0.893445
XS13G0036300	XS12G0043000	0.853787
XS12G0045200	XS13G0036300	0.874362
XS12G0045200	XS04G0169900	0.869316
XS12G0045200	XS13G0251300	0.867463
XS01G0249700	XS08G0231900	0.853368
XS10G0202400	XS14G0145100	0.881145
XS04G0251900	XS09G0175500	0.91111
XS04G0251900	XS09G0085200	0.865559
XS04G0251900	XSUnG0010800	0.886227
XS01G0391500	XS06G0126000	0.871439
XS01G0391500	XSUnG0010800	0.866278
XS01G0191900	XS09G0175500	0.859962
XS01G0191900	XS04G0251900	0.855506
XS01G0191900	XS01G0391500	0.852279
XS03G0113800	XSUnG0259700	0.872367
XS06G0062800	XS01G0201400	0.872078
XS12G0244200	XS06G0062800	0.900122
XS12G0244200	XS01G0091500	0.853905
XS11G0229100	XS06G0062800	0.857943
XS11G0229100	XS12G0244200	0.917655
XS01G0335800	XS10G0158600	0.903607
XS12G0232600	XS13G0011900	0.927334
XS12G0232600	XS12G0015900	0.861027
XS05G0153200	XS08G0162900	0.870883
XS05G0153200	XS02G0073500	0.85311
XS09G0181200	XS13G0053000	0.860471
XS09G0181200	XS06G0019700	0.891783
XS09G0181200	XS05G0253600	0.910503
XS15G0184100	XS14G0050800	0.890651
XS15G0184100	XS11G0198200	0.885981
XS08G0234700	XS15G0184100	0.953748
XS08G0234700	XS14G0050800	0.903159
XS08G0234700	XS04G0154800	0.902906
XS08G0234700	XS01G0383000	0.922776
XS08G0234700	XS06G0039700	0.907432
XS08G0234700	XS11G0198200	0.910174
XS13G0156200	XS15G0184100	0.952952
XS13G0156200	XS14G0050800	0.939467
XS13G0156200	XS04G0154800	0.924459
XS13G0156200	XS01G0383000	0.967388
XS13G0156200	XS06G0039700	0.908647
XS13G0156200	XS08G0234700	0.949526
XS13G0156200	XS11G0198200	0.933477
XS14G0059400	XS15G0184100	0.898335
XS14G0059400	XS14G0050800	0.866965
XS14G0059400	XS05G0040600	0.859756
XS14G0059400	XS04G0154800	0.983725
XS14G0059400	XS01G0383000	0.988542
XS14G0059400	XS06G0039700	0.896376
XS14G0059400	XS08G0234700	0.925325
XS14G0059400	XS04G0205900	0.900226
XS14G0059400	XS13G0120300	0.863028
XS14G0059400	XS11G0198200	0.924463
XS14G0059400	XS13G0156200	0.963703
XS14G0059400	XS02G0233800	0.904043
XS07G0040200	XS15G0184100	0.952092
XS07G0040200	XS14G0050800	0.885101
XS07G0040200	XS01G0383000	0.853388
XS07G0040200	XS08G0234700	0.915438
XS07G0040200	XS13G0156200	0.936085
XS07G0040200	XS14G0059400	0.867854
XS03G0099700	XS05G0182500	0.869662
XS03G0099700	XS05G0058300	0.855782
XS03G0099700	XS02G0073500	0.851835
XS11G0042500	XS11G0052500	0.862864
XS11G0042500	XS12G0179700	0.850564
XS11G0042500	XS01G0305100	0.855235
XS11G0042500	XS03G0099700	0.906637
XS11G0042500	XS12G0238100	0.95413
XS01G0356200	XS02G0058000	0.908656
XS01G0356200	XS06G0059900	0.876219
XS01G0356200	XS11G0215300	0.859496
XS01G0356200	XS13G0120300	0.850734
XS01G0356200	XSUnG0067800	0.876907
XS04G0219600	XS05G0049800	0.860148
XS04G0240600	XS01G0062800	0.855534
XS04G0240600	XS06G0094800	0.864738
XS04G0240600	XS13G0184800	0.886786
XS04G0240600	XS09G0156600	0.887987
XS04G0240600	XS14G0017000	0.853825
XS04G0240600	XS03G0020100	0.89374
XS04G0240600	XS11G0188400	0.853707
XS04G0240600	XS01G0241900	0.881231
XS04G0240600	XS05G0144400	0.880184
XS04G0240600	XS02G0223300	0.897957
XS13G0053600	XS05G0040600	0.911186
XS01G0328600	XS01G0232500	0.857853
XS01G0328600	XS13G0215500	0.882331
XS01G0328600	XS07G0055900	0.8802
XS01G0328600	XS05G0064000	0.855027
XS01G0021800	XS02G0066900	0.855331
XS01G0021800	XS01G0336200	0.854671
XS01G0021800	XS14G0175900	0.853944
XS01G0021800	XSUnG0028600	0.888895
XS01G0021800	XS05G0189700	0.897468
XS01G0021800	XS07G0023200	0.865531
XS01G0021800	XS01G0091500	0.855693
XS01G0021800	XS05G0058500	0.874566
XS01G0021800	XS01G0296900	0.851486
XS01G0021800	XS07G0093100	0.851433
XS01G0021800	XS04G0003400	0.880984
XS01G0021800	XS09G0183200	0.863455
XS01G0021800	XSUnG0100900	0.900733
XS01G0021800	XS04G0260800	0.897236
XS01G0021800	XSUnG0025000	0.859644
XS01G0021800	XS01G0188800	0.867011
XS01G0021800	XS05G0008800	0.850364
XS01G0021800	XS13G0035600	0.885959
XS01G0021800	XS10G0063900	0.853548
XS01G0021800	XS07G0261500	0.875857
XS01G0021800	XS06G0012200	0.85428
XS01G0021800	XS07G0110200	0.85123
XS01G0021800	XS15G0074400	0.897094
XS01G0021800	XS11G0043700	0.851543
XS01G0021800	XS01G0067500	0.859809
XS01G0021800	XS06G0007200	0.885273
XS01G0021800	XS13G0006400	0.854422
XS01G0021800	XS09G0131500	0.921155
XS03G0255800	XS12G0060700	0.891784
XS06G0238400	XS10G0122100	0.852267
XS06G0238400	XS09G0156600	0.877663
XS06G0238400	XS03G0020100	0.901742
XS06G0238400	XS10G0044300	0.912748
XS06G0238400	XS01G0241900	0.865516
XS06G0238400	XS01G0113100	0.88583
XS06G0238400	XS10G0090900	0.857892
XS06G0238400	XS01G0319800	0.856502
XS06G0238400	XS02G0223300	0.86745
XS06G0238400	XS09G0226300	0.86115
XS06G0238400	XS12G0166900	0.852486
XS03G0301000	XS08G0256900	0.920909
XS03G0301000	XS13G0062300	0.948232
XS03G0301000	XS07G0085400	0.917964
XS03G0301000	XS04G0286300	0.945797
XS03G0301000	XS11G0182400	0.931688
XS03G0301000	XS07G0078800	0.908859
XS03G0301000	XS14G0097400	0.897409
XS03G0301000	XS01G0331600	0.882819
XS15G0123100	XS08G0256900	0.916927
XS15G0123100	XS14G0007700	0.858608
XS15G0123100	XS13G0062300	0.922497
XS15G0123100	XS07G0085400	0.912521
XS15G0123100	XS04G0286300	0.921838
XS15G0123100	XS14G0097400	0.926388
XS15G0123100	XS01G0331600	0.851405
XS15G0123100	XS03G0301000	0.887591
XS10G0135900	XS08G0256900	0.934016
XS10G0135900	XS13G0062300	0.95401
XS10G0135900	XS07G0085400	0.937725
XS10G0135900	XS04G0286300	0.93909
XS10G0135900	XS11G0182400	0.909493
XS10G0135900	XS07G0078800	0.858737
XS10G0135900	XS14G0097400	0.943255
XS10G0135900	XS01G0331600	0.872768
XS10G0135900	XS03G0301000	0.969486
XS10G0135900	XS15G0123100	0.927492
XS08G0179100	XS12G0034800	0.86579
XS10G0202000	XS02G0008800	0.874847
XS10G0202000	XS03G0245600	0.894091
XS10G0202000	XS13G0062600	0.891227
XS10G0202000	XS02G0097200	0.861818
XS06G0039700	XS15G0184100	0.861722
XS06G0039700	XS14G0050800	0.877628
XS06G0039700	XS05G0040600	0.872843
XS06G0039700	XS04G0154800	0.858674
XS06G0039700	XS01G0383000	0.911876
XS06G0039700	XS07G0027700	0.906361
XS06G0039700	XS11G0198200	0.961187
XS01G0122700	XS05G0040600	0.901065
XS01G0122700	XS11G0198400	0.884772
XS15G0123600	XS06G0039700	0.883339
XS15G0123600	XS06G0167000	0.861423
XS15G0123600	XS07G0027700	0.851925
XS15G0123600	XS11G0198300	0.86219
XS13G0009700	XS02G0058000	0.879117
XS13G0009700	XS05G0040600	0.887319
XS13G0009700	XS14G0145100	0.860734
XS13G0009700	XS06G0039700	0.870453
XS13G0009700	XS13G0053600	0.877115
XS13G0009700	XS10G0044300	0.858156
XS13G0009700	XS14G0002500	0.89215
XS13G0009700	XS07G0027700	0.861721
XS13G0009700	XS05G0130400	0.888122
XS13G0009700	XS07G0243200	0.915132
XS01G0173300	XS07G0085400	0.851455
XS01G0173300	XS14G0097400	0.862163
XS07G0226100	XSUnG0053700	0.864675
XS07G0226100	XS14G0069300	0.87891
XS04G0154800	XS15G0184100	0.870324
XS04G0154800	XS11G0198200	0.885377
XS15G0102500	XS04G0154800	0.85202
XS07G0117700	XS02G0066900	0.890207
XS07G0117700	XSUnG0028600	0.864013
XS07G0117700	XS03G0297400	0.85974
XS07G0117700	XS10G0163600	0.870063
XS07G0117700	XS12G0249300	0.873331
XS07G0117700	XS07G0023200	0.877046
XS07G0117700	XS04G0197200	0.891059
XS07G0117700	XS03G0274600	0.900603
XS07G0117700	XS05G0058500	0.874193
XS07G0117700	XS13G0052300	0.87938
XS07G0117700	XS01G0392100	0.88752
XS04G0012700	XS14G0175900	0.852792
XS04G0012700	XS07G0023200	0.87159
XS04G0012700	XS07G0117700	0.891191
XS04G0012700	XS10G0063900	0.888318
XS14G0021600	XS07G0023200	0.863489
XS14G0021600	XS13G0052300	0.851784
XS14G0021600	XS07G0093100	0.853049
XS14G0021600	XS15G0074400	0.858933
XS05G0154900	XS13G0053000	0.853726
XS05G0154900	XS14G0175900	0.858142
XS05G0154900	XSUnG0028600	0.870876
XS05G0154900	XS05G0058500	0.861863
XS05G0154900	XS04G0003400	0.875797
XS05G0154900	XSUnG0100900	0.852156
XS05G0154900	XS04G0260800	0.887232
XS03G0158700	XS05G0154900	0.859151
XSUnG0045500	XS01G0384000	0.857136
XS07G0197000	XS01G0384000	0.857222
XS07G0197000	XSUnG0045500	0.888125
XS07G0197000	XS03G0223300	0.889863
XS04G0260800	XS09G0181200	0.864153
XS04G0260800	XS01G0336200	0.883202
XS04G0260800	XSUnG0028600	0.900691
XS04G0260800	XS05G0189700	0.929268
XS04G0260800	XS01G0091500	0.850724
XS04G0260800	XS05G0058500	0.925095
XS04G0260800	XS01G0296900	0.903278
XS04G0260800	XS07G0033700	0.854077
XS04G0260800	XS13G0052300	0.855832
XS04G0260800	XS07G0093100	0.877119
XS04G0260800	XS04G0084500	0.911237
XS04G0260800	XS04G0003400	0.879929
XS04G0260800	XS09G0183200	0.872133
XS04G0260800	XSUnG0100900	0.91481
XS07G0116600	XS13G0079700	0.85973
XS07G0116600	XS01G0144000	0.872113
XS07G0116600	XS07G0055900	0.885252
XS07G0116600	XS08G0179100	0.85735
XS05G0152500	XS10G0130600	0.905963
XS13G0162400	XS10G0130600	0.923279
XS13G0135300	XS05G0152500	0.851732
XS13G0135300	XS14G0001100	0.863301
XS13G0135300	XS13G0162400	0.87127
XS10G0120300	XS01G0384000	0.856747
XS10G0120300	XS06G0094800	0.861218
XS10G0120300	XS07G0225800	0.883415
XS04G0104400	XS05G0006200	0.868996
XS14G0017000	XS01G0384000	0.879349
XS14G0017000	XS01G0288700	0.887227
XS14G0017000	XS06G0094800	0.851835
XS14G0017000	XS13G0184800	0.875394
XS14G0017000	XS06G0064900	0.857555
XS14G0017000	XS10G0122100	0.882309
XS14G0017000	XS07G0225800	0.850257
XS14G0017000	XS09G0156600	0.872741
XS12G0015900	XSUnG0210500	0.881413
XS12G0015900	XS13G0264200	0.866829
XS12G0015900	XS13G0011900	0.879417
XS12G0015900	XS07G0226900	0.897443
XS12G0015900	XS03G0020100	0.873573
XS02G0036700	XS13G0264200	0.850155
XS02G0036700	XS10G0209700	0.868756
XS02G0036700	XS01G0288700	0.870022
XS02G0036700	XS10G0027300	0.870737
XS02G0036700	XSUnG0200500	0.902062
XS02G0036700	XS14G0002500	0.855859
XS02G0036700	XS01G0241900	0.861982
XS02G0036700	XS03G0186900	0.856972
XS02G0036700	XS01G0319800	0.881282
XS13G0061200	XS01G0384000	0.853331
XS13G0061200	XS01G0288700	0.8752
XS13G0061200	XS13G0184800	0.86667
XS13G0061200	XSUnG0143000	0.873595
XS13G0061200	XS10G0122100	0.905755
XS13G0061200	XS14G0017000	0.906501
XS13G0061200	XS03G0020100	0.897606
XS13G0061200	XS13G0059900	0.878713
XS13G0061200	XS10G0044300	0.880663
XS13G0061200	XS13G0176400	0.947856
XS13G0061200	XS01G0241900	0.885236
XS01G0152900	XS01G0384000	0.887351
XS01G0152900	XS04G0154600	0.9534
XS01G0152900	XS14G0031500	0.873305
XS01G0152900	XS06G0064900	0.887061
XS01G0152900	XS10G0122100	0.899858
XS01G0152900	XS09G0156600	0.852018
XS01G0152900	XS08G0072500	0.872472
XS01G0152900	XS13G0179700	0.911633
XS01G0152900	XS08G0169700	0.858613
XS01G0152900	XS12G0006400	0.881632
XS01G0152900	XS01G0319800	0.868649
XS01G0152900	XS04G0265900	0.938559
XS01G0152900	XS09G0226300	0.860664
XS03G0318400	XS01G0384000	0.881081
XS03G0318400	XS04G0265900	0.874505
XS03G0318400	XS08G0001700	0.867359
XS03G0318400	XS09G0105800	0.879551
XS13G0014800	XS01G0384000	0.888413
XS13G0014800	XS01G0180100	0.874826
XS13G0014800	XS13G0184800	0.852264
XS13G0014800	XS10G0120300	0.867929
XS13G0014800	XS08G0169700	0.873409
XS13G0014800	XS07G0072300	0.866953
XS13G0014800	XS04G0265900	0.879512
XS13G0014800	XS08G0001700	0.878913
XS13G0014800	XSUnG0136100	0.868863
XS13G0014800	XS09G0105800	0.873613
XS13G0014800	XS03G0318400	0.856806
XS13G0014800	XS06G0061800	0.927879
XS13G0014800	XS04G0104400	0.889944
XS11G0107200	XS01G0384000	0.915088
XS11G0107200	XS02G0193800	0.866029
XS11G0107200	XS04G0154600	0.891427
XS11G0107200	XSUnG0053700	0.86094
XS11G0107200	XS13G0184800	0.901012
XS11G0107200	XSUnG0143000	0.886416
XS11G0107200	XS06G0064900	0.868604
XS11G0107200	XS10G0122100	0.91733
XS11G0107200	XS09G0156600	0.905756
XS11G0107200	XS03G0020100	0.916027
XS11G0107200	XS11G0188400	0.855303
XS11G0107200	XS02G0069200	0.888088
XS11G0107200	XS13G0061200	0.858506
XS11G0107200	XS12G0006400	0.890459
XS11G0107200	XS12G0125600	0.891829
XS11G0107200	XS01G0319800	0.945287
XS11G0107200	XS07G0072300	0.862336
XS11G0107200	XS02G0223300	0.866182
XS11G0107200	XS04G0265900	0.86003
XS11G0107200	XS09G0226300	0.90462
XS11G0107200	XS01G0152900	0.90394
XS11G0107200	XS08G0001700	0.909455
XS11G0107200	XS12G0166900	0.874649
XS11G0107200	XSUnG0136100	0.915861
XS11G0107200	XS09G0105800	0.93645
XS11G0107200	XS03G0318400	0.883606
XS11G0107200	XS05G0175300	0.867069
XS11G0107200	XS01G0359300	0.895779
XS11G0107200	XS04G0271100	0.899814
XS11G0107200	XS13G0014800	0.882377
XS11G0107200	XS02G0142600	0.903925
XS07G0078100	XS13G0039400	0.854794
XS15G0104800	XS07G0078100	0.859988
XS02G0066500	XS01G0201400	0.865772
XS02G0066500	XS01G0336200	0.855702
XS02G0066500	XS06G0012400	0.850159
XS02G0066500	XS05G0189700	0.912647
XS02G0066500	XS01G0091500	0.86384
XS02G0066500	XS04G0197200	0.863798
XS02G0066500	XS05G0058500	0.863687
XS02G0066500	XS01G0296900	0.861874
XS02G0066500	XS07G0033700	0.857337
XS02G0066500	XS07G0093100	0.856176
XS02G0066500	XS04G0084500	0.867113
XS02G0066500	XS09G0183200	0.886236
XS02G0066500	XSUnG0100900	0.878955
XS02G0066500	XS13G0014600	0.851821
XS02G0066500	XS01G0232500	0.876939
XS02G0066500	XS13G0035600	0.865334
XS02G0066500	XS10G0185900	0.87476
XS02G0066500	XS15G0074400	0.907847
XS02G0066500	XS01G0067500	0.865244
XS02G0066500	XS07G0093400	0.858931
XS02G0066500	XS13G0006400	0.851761
XS02G0066500	XS07G0024600	0.867127
XS02G0066500	XS09G0131500	0.854324
XS02G0066500	XS01G0317300	0.87218
XS02G0066500	XS08G0203300	0.851068
XS02G0066500	XS02G0058100	0.854979
XS02G0056600	XS06G0187000	0.868627
XS02G0056600	XS05G0042400	0.875996
XS02G0056600	XS04G0256100	0.891548
XS01G0383000	XS15G0184100	0.887333
XS01G0383000	XS14G0050800	0.890079
XS01G0383000	XS05G0040600	0.901549
XS01G0383000	XS04G0154800	0.970249
XS01G0383000	XS11G0198200	0.930575
XS02G0233800	XS05G0040600	0.890052
XS02G0233800	XS04G0154800	0.915746
XS02G0233800	XSUnG0046700	0.857506
XS02G0233800	XS01G0383000	0.919291
XS02G0233800	XS13G0053600	0.869488
XS02G0233800	XS06G0059900	0.917936
XS02G0233800	XS11G0215300	0.855366
XS02G0233800	XS04G0205900	0.948195
XS02G0233800	XS13G0174300	0.912089
XS02G0233800	XS13G0120300	0.946479
XS02G0233800	XS02G0157400	0.862174
XS04G0079800	XS02G0058000	0.864762
XS04G0079800	XS05G0040600	0.882539
XS04G0079800	XS01G0383000	0.873543
XS04G0079800	XS06G0039700	0.873198
XS04G0079800	XS06G0059900	0.871509
XS04G0079800	XS02G0157100	0.872662
XS04G0079800	XS11G0215300	0.863082
XS04G0079800	XS13G0174300	0.938308
XS04G0079800	XS13G0120300	0.963217
XS04G0079800	XS07G0027700	0.877414
XS04G0079800	XS01G0356200	0.854758
XS04G0079800	XS02G0233800	0.90169
XS04G0079800	XS11G0215200	0.917809
XS04G0079800	XS02G0157400	0.8717
XS01G0380300	XS01G0383000	0.871445
XS01G0380300	XS02G0157100	0.88967
XS01G0380300	XS13G0174300	0.930884
XS01G0380300	XS02G0233800	0.858929
XS01G0380300	XS04G0079800	0.853365
XS01G0380300	XS02G0157400	0.944927
XS05G0142500	XS02G0008800	0.939913
XS05G0011000	XS02G0008800	0.878394
XS05G0011000	XS13G0120600	0.855696
XS05G0011000	XS05G0142500	0.897802
XS05G0011000	XS13G0120300	0.875791
XS05G0011000	XS02G0097200	0.875483
XS05G0011000	XS06G0165000	0.878104
XS05G0011000	XS09G0028700	0.893503
XS13G0034000	XS04G0154600	0.869745
XS13G0034000	XS06G0091600	0.860869
XS06G0094800	XSUnG0067200	0.850995
XS06G0094800	XS01G0288700	0.895923
XS06G0094800	XS05G0049800	0.889786
XS04G0128300	XSUnG0067200	0.860771
XS04G0128300	XS13G0011900	0.855273
XS04G0128300	XS13G0184800	0.890649
XS04G0128300	XS09G0156600	0.879918
XS04G0128300	XS11G0097700	0.912029
XS04G0128300	XS03G0020100	0.853876
XS04G0128300	XS03G0019600	0.873047
XS04G0128300	XS08G0056400	0.851662
XS04G0128300	XS01G0341200	0.913254
XS01G0049200	XS02G0058000	0.892626
XS01G0049200	XS06G0064900	0.864405
XS01G0049200	XS04G0151900	0.888515
XS01G0049200	XS14G0045400	0.8933
XS01G0049200	XS13G0141400	0.880485
XS12G0006400	XS04G0154600	0.86669
XS12G0006400	XS05G0049800	0.865831
XS12G0006400	XS13G0034000	0.867239
XS12G0006400	XS06G0094800	0.883681
XS12G0006400	XS10G0122100	0.856889
XS12G0006400	XS09G0156600	0.899018
XS12G0006400	XS11G0188400	0.91233
XS12G0006400	XS01G0115500	0.866899
XS15G0181000	XS01G0062800	0.883793
XS15G0181000	XS13G0184800	0.870661
XS15G0181000	XS09G0156600	0.88065
XS15G0181000	XS14G0045400	0.879242
XS15G0181000	XS04G0219600	0.875491
XS15G0181000	XS10G0090900	0.852132
XS15G0181000	XS04G0240600	0.877243
XS07G0074800	XSUnG0028600	0.868283
XS07G0074800	XS03G0297400	0.891604
XS07G0074800	XS13G0037900	0.894849
XS07G0074800	XS01G0392100	0.851377
XS07G0074800	XS06G0019700	0.862068
XS07G0074800	XS05G0253600	0.853788
XS07G0074800	XS10G0152800	0.883788
XS07G0074800	XS05G0121800	0.871938
XS07G0074800	XS07G0261500	0.857743
XS07G0074800	XS01G0245100	0.860306
XS07G0074800	XS03G0212300	0.888826
XS07G0074800	XS02G0268100	0.850153
XS15G0003000	XS13G0192200	0.877124
XS04G0234100	XS01G0378400	0.902568
XS05G0264400	XS01G0378400	0.943808
XS05G0264400	XS01G0284700	0.866285
XS05G0264400	XS04G0234100	0.883655
XS02G0205600	XS01G0378400	0.867621
XS02G0205600	XS04G0234100	0.891068
XS02G0205600	XS05G0264400	0.890406
XS08G0193600	XS05G0142500	0.881301
XS08G0193600	XS08G0056400	0.876152
XS08G0193600	XS13G0120300	0.856041
XS08G0193600	XS01G0356200	0.859742
XS08G0193600	XS04G0132300	0.85183
XS08G0193600	XS01G0341200	0.882449
XS08G0193600	XS03G0096200	0.859079
XS08G0193600	XS11G0215200	0.932267
XS01G0159400	XS02G0008800	0.878226
XS01G0159400	XS02G0097200	0.876324
XS01G0159400	XS08G0193600	0.86823
XS12G0236800	XS07G0222000	0.874264
XS10G0129700	XS12G0236800	0.882116
XS10G0129700	XS09G0218100	0.85019
XS14G0087000	XS03G0245600	0.851377
XS14G0087000	XS01G0331600	0.907082
XS14G0087000	XS15G0003000	0.853124
XSUnG0136100	XS01G0384000	0.934468
XSUnG0136100	XS04G0154600	0.926114
XSUnG0136100	XS06G0094800	0.860282
XSUnG0136100	XS13G0184800	0.868088
XSUnG0136100	XS14G0031500	0.876753
XSUnG0136100	XSUnG0143000	0.873902
XSUnG0136100	XS06G0064900	0.937534
XSUnG0136100	XS10G0122100	0.901709
XSUnG0136100	XS09G0156600	0.868912
XSUnG0136100	XS03G0307200	0.853644
XSUnG0136100	XS11G0188400	0.854862
XSUnG0136100	XS08G0072500	0.883237
XSUnG0136100	XS03G0186900	0.85366
XSUnG0136100	XS02G0069200	0.877152
XSUnG0136100	XS12G0013000	0.894612
XSUnG0136100	XS13G0179700	0.886423
XSUnG0136100	XS08G0169700	0.907837
XSUnG0136100	XS12G0006400	0.886528
XSUnG0136100	XS12G0125600	0.897785
XSUnG0136100	XS01G0100100	0.868613
XSUnG0136100	XS01G0319800	0.869071
XSUnG0136100	XS07G0072300	0.906018
XSUnG0136100	XS04G0265900	0.94819
XSUnG0136100	XS09G0226300	0.85621
XSUnG0136100	XS01G0152900	0.970146
XSUnG0136100	XS08G0001700	0.894915
XSUnG0136100	XS12G0166900	0.874073
XS05G0258600	XS02G0157100	0.850453
XS05G0258600	XS02G0157400	0.852994
XS11G0124000	XS11G0081600	0.87859
XS11G0124000	XS02G0157100	0.873818
XS11G0124000	XS05G0258600	0.914148
XS11G0124000	XS01G0282300	0.855599
XS13G0120300	XS05G0040600	0.898981
XS13G0120300	XS04G0154800	0.875738
XS13G0120300	XS01G0383000	0.886136
XS13G0120300	XS13G0053600	0.859265
XS13G0120300	XS06G0059900	0.928689
XS13G0120300	XS02G0157100	0.876002
XS13G0120300	XS05G0142500	0.864325
XS13G0120300	XS04G0205900	0.914281
XS13G0120300	XS13G0174300	0.894335
XS13G0120300	XS02G0157400	0.874801
XS03G0247400	XS02G0058000	0.857809
XS03G0247400	XS05G0040600	0.891515
XS03G0247400	XS10G0209700	0.851979
XS03G0247400	XS14G0145100	0.874549
XS03G0247400	XS13G0053600	0.867156
XS03G0247400	XS12G0128100	0.871183
XS03G0247400	XS05G0104700	0.852574
XS03G0247400	XS06G0059900	0.876323
XS03G0247400	XS02G0157100	0.887703
XS03G0247400	XS13G0174300	0.887319
XS03G0247400	XS02G0233800	0.858644
XS03G0247400	XS02G0157400	0.866368
XS11G0215200	XS06G0059900	0.877778
XS11G0215200	XS02G0157100	0.853008
XS11G0215200	XS05G0142500	0.884538
XS11G0215200	XS05G0258600	0.88767
XS11G0215200	XS04G0205900	0.905711
XS11G0215200	XS13G0174300	0.862528
XS11G0215200	XS13G0120300	0.934411
XS11G0215200	XS01G0356200	0.864457
XS11G0215200	XS03G0096200	0.854225
XS11G0215200	XS02G0233800	0.91366
XS06G0119800	XS05G0058300	0.873663
XS06G0119800	XS01G0344000	0.871462
XS06G0119800	XS14G0069300	0.871375
XS06G0119800	XS07G0226100	0.893055
XS06G0119800	XS02G0157100	0.870563
XS06G0119800	XS01G0282300	0.936005
XS06G0119800	XS11G0124000	0.892745
XS06G0119800	XS07G0007100	0.873063
XS06G0119800	XS10G0136300	0.864315
XS06G0119800	XS05G0104400	0.931827
XS06G0119800	XS08G0162900	0.900813
XS06G0119800	XS06G0080600	0.863783
XS06G0119800	XS06G0122500	0.860529
XS03G0273000	XS11G0182700	0.85017
XS01G0344700	XSUnG0028600	0.863897
XS01G0344700	XS03G0297400	0.855851
XS01G0344700	XS04G0003400	0.899353
XS01G0344700	XSUnG0025000	0.866027
XS01G0344700	XS10G0063900	0.851259
XS01G0344700	XS01G0245100	0.853528
XS01G0344700	XS05G0064000	0.869252
XS01G0344700	XS13G0006400	0.871759
XS01G0344700	XS08G0099500	0.877543
XS01G0344700	XSUnG0182900	0.869159
XS01G0344700	XS01G0287400	0.889319
XS14G0076100	XS05G0156200	0.859171
XS05G0085400	XS13G0200100	0.905808
XS03G0322700	XS08G0223300	0.874696
XS03G0322700	XS05G0156200	0.881648
XS03G0322700	XS14G0076100	0.929222
XS07G0096100	XS13G0200100	0.930175
XS07G0096100	XS05G0085400	0.971284
XS05G0042600	XS05G0182500	0.87547
XS05G0042600	XS01G0180100	0.856832
XS05G0042600	XS12G0179700	0.933822
XS05G0042600	XS01G0344000	0.864421
XS05G0042600	XS14G0069300	0.887547
XS05G0042600	XS14G0022200	0.853118
XS05G0042600	XS03G0307200	0.852982
XS05G0042600	XS02G0073500	0.859281
XS10G0158600	XSUnG0067200	0.907933
XS10G0158600	XS01G0180100	0.878761
XS10G0158600	XSUnG0053700	0.886623
XS10G0158600	XS01G0344000	0.85672
XS10G0158600	XS14G0069300	0.906424
XS10G0158600	XS03G0307200	0.891224
XS10G0158600	XS07G0226100	0.864198
XS10G0158600	XS12G0013000	0.875003
XS10G0158600	XS01G0341200	0.881643
XS10G0158600	XSUnG0067800	0.859915
XS07G0115300	XSUnG0053700	0.869012
XS07G0115300	XS12G0179700	0.88926
XS07G0115300	XSUnG0045500	0.877594
XS07G0115300	XS14G0031500	0.87956
XS07G0115300	XS01G0344000	0.873468
XS07G0115300	XS03G0307200	0.925879
XS07G0115300	XS08G0072500	0.866486
XS07G0115300	XS10G0158600	0.867565
XS07G0115300	XS12G0013000	0.876239
XS07G0115300	XS13G0141400	0.863759
XS13G0011900	XSUnG0210500	0.898574
XS13G0011900	XS13G0264200	0.907466
XS13G0011900	XS12G0240700	0.861285
XS03G0020100	XS13G0264200	0.865907
XS03G0020100	XS12G0240700	0.850873
XS03G0020100	XS04G0154600	0.857574
XS03G0020100	XSUnG0067200	0.863702
XS03G0020100	XS13G0011900	0.852665
XS03G0020100	XSUnG0053700	0.878644
XS03G0020100	XS01G0288700	0.858043
XS03G0020100	XS06G0094800	0.851198
XS03G0020100	XS13G0184800	0.956709
XS03G0020100	XS06G0064900	0.857989
XS03G0020100	XS10G0122100	0.902934
XS03G0020100	XS07G0222000	0.855453
XS03G0020100	XS09G0156600	0.956617
XS03G0020100	XS14G0017000	0.882567
XS03G0020100	XS11G0097700	0.88563
XS11G0215300	XS13G0264200	0.869221
XS11G0215300	XS02G0058000	0.915244
XS11G0215300	XS10G0209700	0.863356
XS11G0215300	XS06G0064900	0.86371
XS11G0215300	XS14G0145100	0.866258
XS11G0215300	XS07G0027700	0.92676
XS11G0215300	XS12G0013000	0.863527
XS11G0215300	XSUnG0067800	0.901515
XS08G0056400	XS13G0264200	0.872254
XS08G0056400	XS13G0011900	0.858689
XS08G0056400	XS09G0156600	0.900072
XS08G0056400	XS11G0188400	0.862551
XS08G0056400	XS01G0341200	0.879952
XS04G0132300	XSUnG0067200	0.885799
XS04G0132300	XS09G0156600	0.861866
XS04G0132300	XS03G0019600	0.861253
XS04G0132300	XS04G0219600	0.873343
XS04G0132300	XS01G0341200	0.887681
XS01G0113100	XSUnG0210500	0.856913
XS01G0113100	XS13G0264200	0.887726
XS01G0113100	XS01G0288700	0.878656
XS01G0113100	XS07G0226900	0.905148
XS01G0113100	XS10G0122100	0.852953
XS01G0113100	XS09G0156600	0.888451
XS01G0113100	XS14G0017000	0.871447
XS01G0113100	XS10G0027300	0.905205
XS01G0113100	XS03G0020100	0.912989
XS01G0113100	XS11G0188400	0.877404
XS01G0113100	XS10G0044300	0.941506
XS01G0113100	XS13G0176400	0.862914
XS01G0113100	XS12G0015900	0.903263
XS01G0113100	XS01G0241900	0.956063
XS01G0113100	XS13G0061200	0.869227
XS01G0319800	XS13G0264200	0.86123
XS01G0319800	XS01G0384000	0.873828
XS01G0319800	XS04G0154600	0.88504
XS01G0319800	XSUnG0067200	0.852468
XS01G0319800	XS13G0011900	0.854286
XS01G0319800	XSUnG0053700	0.873152
XS01G0319800	XS01G0288700	0.869866
XS01G0319800	XS13G0184800	0.901881
XS01G0319800	XS06G0064900	0.88806
XS01G0319800	XS10G0122100	0.918921
XS01G0319800	XS07G0222000	0.863175
XS01G0319800	XS09G0156600	0.91756
XS01G0319800	XS03G0020100	0.926343
XS01G0319800	XS10G0044300	0.873473
XS01G0319800	XS01G0241900	0.878787
XS01G0319800	XS02G0069200	0.888456
XS01G0319800	XS13G0061200	0.852943
XS01G0319800	XS08G0169700	0.859541
XS01G0319800	XS01G0113100	0.868008
XS01G0319800	XS12G0125600	0.896129
XS08G0001700	XS01G0384000	0.910545
XS08G0001700	XSUnG0067200	0.911384
XS08G0001700	XS01G0180100	0.875773
XS08G0001700	XS10G0209700	0.896006
XS08G0001700	XSUnG0053700	0.877618
XS08G0001700	XS13G0184800	0.897253
XS08G0001700	XSUnG0143000	0.903318
XS08G0001700	XS06G0064900	0.918288
XS08G0001700	XS10G0122100	0.871752
XS08G0001700	XS09G0156600	0.921391
XS08G0001700	XS14G0017000	0.853944
XS08G0001700	XS03G0020100	0.872039
XS08G0001700	XS11G0188400	0.853013
XS08G0001700	XS03G0186900	0.867263
XS08G0001700	XS02G0069200	0.887607
XS08G0001700	XS12G0013000	0.89951
XS08G0001700	XS08G0169700	0.92883
XS08G0001700	XS12G0125600	0.881209
XS08G0001700	XS01G0100100	0.866573
XS08G0001700	XS04G0257800	0.856693
XS08G0001700	XS01G0319800	0.923654
XS08G0001700	XS07G0072300	0.857499
XS08G0001700	XS02G0223300	0.868334
XS08G0001700	XS04G0265900	0.863886
XS08G0001700	XS09G0226300	0.883732
XS08G0019100	XS10G0209700	0.896574
XS08G0019100	XS06G0064900	0.854889
XS08G0019100	XS07G0222000	0.918787
XS08G0019100	XS10G0027300	0.905385
XS08G0019100	XS08G0160700	0.910816
XS08G0019100	XS13G0176400	0.867756
XS08G0019100	XS01G0241900	0.895611
XS08G0019100	XS02G0069200	0.858251
XS08G0019100	XS01G0113100	0.860999
XS08G0019100	XS06G0151800	0.851923
XS08G0019100	XS01G0358600	0.91722
XS08G0019100	XS12G0125600	0.887998
XS08G0019100	XS13G0243500	0.903188
XS08G0019100	XS05G0060900	0.885746
XS08G0019100	XS15G0015200	0.899167
XS08G0019100	XS01G0319800	0.860454
XS08G0019100	XS07G0282100	0.895313
XS08G0019100	XS02G0036700	0.8651
XS08G0019100	XS09G0226300	0.861479
XS08G0019100	XS12G0166900	0.896371
XS08G0019100	XS03G0048300	0.882039
XS08G0019100	XS08G0168000	0.852524
XS03G0177800	XS02G0058000	0.875016
XS03G0177800	XS06G0039700	0.88666
XS03G0177800	XS13G0174300	0.91242
XS03G0177800	XS05G0130400	0.859552
XS03G0177800	XS02G0233800	0.861845
XS03G0177800	XS04G0079800	0.874769
XS03G0177800	XS13G0009700	0.889872
XS11G0215800	XS02G0066900	0.859655
XS11G0215800	XS08G0245200	0.905404
XS11G0215800	XS14G0175900	0.869107
XS11G0215800	XS10G0163600	0.916615
XS11G0215800	XS12G0249300	0.88529
XS11G0215800	XS07G0023200	0.892981
XS11G0215800	XS01G0000400	0.879385
XS11G0215800	XS04G0197200	0.918053
XS11G0215800	XS03G0274600	0.861916
XS11G0215800	XS05G0058500	0.853082
XS11G0215800	XS13G0052300	0.933948
XS11G0215800	XS07G0093100	0.916327
XS11G0215800	XS06G0264200	0.876116
XS11G0215800	XS09G0183200	0.892895
XS11G0215800	XSUnG0100900	0.862244
XS11G0215800	XSUnG0097700	0.894061
XS11G0215800	XS09G0241100	0.896246
XS11G0215800	XS07G0117700	0.917204
XS11G0215800	XS10G0063900	0.863095
XS11G0215800	XS04G0071600	0.91659
XS11G0215800	XS08G0223600	0.860195
XS11G0215800	XS11G0032900	0.890136
XS07G0251500	XS05G0184200	0.872272
XS07G0261000	XS05G0012100	0.904661
XS07G0261000	XS13G0014600	0.857686
XSUnG0147100	XS13G0014600	0.859016
XSUnG0147100	XS04G0105700	0.910179
XS15G0099800	XS12G0041500	0.852933
XS03G0274400	XS01G0329200	0.856073
XS03G0274400	XS13G0105500	0.862411
XS03G0274400	XS05G0200500	0.896504
XS03G0274400	XS06G0019700	0.855493
XS03G0274400	XS05G0253600	0.858056
XS03G0274400	XS04G0025500	0.857048
XS03G0274400	XS09G0178800	0.864232
XS03G0274400	XS15G0099800	0.874216
XS06G0074700	XS06G0080600	0.869013
XS15G0143900	XS11G0107800	0.925059
XS15G0143900	XS10G0027100	0.872132
XS15G0143900	XS04G0025500	0.891348
XS14G0110600	XS11G0107800	0.884994
XS14G0110600	XS06G0019700	0.902884
XS14G0110600	XS10G0027100	0.931913
XS14G0110600	XS04G0025500	0.888075
XS14G0110600	XS03G0301200	0.859513
XS14G0110600	XSUnG0182900	0.904538
XS14G0110600	XS01G0287400	0.931044
XS07G0028400	XS11G0107800	0.888214
XS07G0028400	XS01G0212400	0.894664
XS07G0028400	XS10G0027100	0.913488
XS07G0028400	XS04G0025500	0.856665
XS07G0028400	XS08G0099500	0.851323
XS07G0028400	XSUnG0182900	0.906032
XS07G0028400	XS01G0287400	0.861257
XS01G0188800	XSUnG0028600	0.877235
XS01G0188800	XS04G0003400	0.914013
XS01G0188800	XS03G0301200	0.858857
XS01G0188800	XS01G0287400	0.878445
XS10G0063600	XS13G0053000	0.868819
XS10G0063600	XS14G0110600	0.926382
XS10G0063600	XSUnG0028600	0.918956
XS10G0063600	XS03G0297400	0.897543
XS10G0063600	XS07G0023200	0.856097
XS10G0063600	XS03G0274600	0.861383
XS10G0063600	XS05G0058500	0.871916
XS10G0063600	XS07G0028400	0.863715
XS10G0063600	XS10G0156100	0.867631
XS10G0063600	XS01G0392100	0.886109
XS10G0063600	XS06G0019700	0.910395
XS10G0063600	XS10G0063900	0.90398
XS10G0063600	XS10G0027100	0.886968
XS10G0063600	XS07G0261500	0.89188
XS10G0063600	XS07G0110200	0.880702
XS10G0063600	XS01G0245100	0.854122
XS10G0063600	XS03G0212300	0.888653
XS10G0063600	XS08G0099500	0.851155
XS10G0063600	XSUnG0182900	0.899657
XS10G0063600	XS01G0287400	0.898221
XS03G0180500	XS11G0107800	0.93515
XS03G0180500	XS13G0053000	0.882585
XS03G0180500	XS14G0110600	0.850292
XS03G0180500	XS04G0266600	0.875595
XS03G0180500	XS06G0019700	0.863662
XS03G0180500	XS08G0243200	0.863578
XS03G0180500	XS05G0121800	0.919418
XS03G0180500	XS10G0027100	0.893593
XS03G0180500	XS07G0110200	0.864899
XS03G0180500	XS04G0025500	0.869952
XS03G0180500	XS01G0377500	0.937346
XS03G0180500	XS03G0212300	0.864877
XS03G0180500	XS08G0099500	0.871328
XS03G0180500	XSUnG0182900	0.918985
XS03G0180500	XS01G0287400	0.900069
XS06G0068600	XS05G0200500	0.916861
XS06G0068600	XS01G0392100	0.854237
XS06G0068600	XS05G0000500	0.875893
XS06G0068600	XS06G0019700	0.88659
XS06G0068600	XS05G0193100	0.868341
XS06G0068600	XS10G0027100	0.864596
XS06G0068600	XS04G0025500	0.865675
XS13G0264200	XSUnG0210500	0.906084
XS13G0264200	XS07G0027700	0.853341
XS13G0264200	XS12G0013000	0.878915
XS04G0154600	XS13G0264200	0.885119
XS04G0154600	XS12G0013000	0.853958
XS06G0091600	XS02G0058000	0.853361
XS06G0091600	XS12G0013000	0.862633
XS06G0091600	XS03G0306900	0.852767
XS09G0156600	XSUnG0210500	0.861867
XS09G0156600	XS13G0264200	0.920488
XS09G0156600	XS01G0384000	0.854411
XS09G0156600	XS12G0240700	0.875139
XS09G0156600	XS04G0154600	0.906518
XS09G0156600	XSUnG0067200	0.896982
XS09G0156600	XS13G0011900	0.895427
XS09G0156600	XSUnG0053700	0.879637
XS09G0156600	XS05G0049800	0.853566
XS09G0156600	XS13G0034000	0.872407
XS09G0156600	XS06G0094800	0.880337
XS09G0156600	XS13G0184800	0.961542
XS09G0156600	XS06G0064900	0.922233
XS09G0156600	XS10G0122100	0.916849
XS09G0156600	XS12G0013000	0.908625
XS09G0156600	XS01G0341200	0.876666
XS10G0027300	XS13G0264200	0.91153
XS10G0027300	XS10G0209700	0.858501
XS10G0027300	XS01G0288700	0.855688
XS10G0027300	XS06G0064900	0.903529
XS10G0027300	XS10G0122100	0.854813
XS10G0027300	XS07G0222000	0.89554
XS03G0019600	XSUnG0210500	0.871689
XS03G0019600	XS13G0264200	0.903742
XS03G0019600	XS02G0058000	0.889649
XS03G0019600	XSUnG0067200	0.904235
XS03G0019600	XS13G0011900	0.902582
XS03G0019600	XSUnG0053700	0.886175
XS03G0019600	XS13G0184800	0.880952
XS03G0019600	XS06G0064900	0.870901
XS03G0019600	XS09G0156600	0.897178
XS03G0019600	XS11G0097700	0.851924
XS03G0019600	XS11G0215300	0.855918
XS03G0019600	XS12G0013000	0.865822
XS03G0019600	XS01G0341200	0.879711
XS03G0019600	XSUnG0067800	0.860854
XS10G0044300	XS13G0264200	0.935276
XS10G0044300	XS02G0058000	0.892027
XS10G0044300	XS13G0184800	0.909965
XS10G0044300	XSUnG0143000	0.862745
XS10G0044300	XS06G0064900	0.908595
XS10G0044300	XS10G0122100	0.894715
XS10G0044300	XS07G0222000	0.895667
XS10G0044300	XS09G0156600	0.920891
XS10G0044300	XS11G0097700	0.868303
XS10G0044300	XS10G0027300	0.895234
XS10G0044300	XS03G0020100	0.926883
XS10G0044300	XS11G0188400	0.865802
XS10G0044300	XS03G0019600	0.874637
XS10G0044300	XS08G0160700	0.859027
XS01G0241900	XSUnG0210500	0.854037
XS01G0241900	XS13G0264200	0.931321
XS01G0241900	XS13G0011900	0.878105
XS01G0241900	XS01G0288700	0.882585
XS01G0241900	XS07G0226900	0.873976
XS01G0241900	XS13G0184800	0.921348
XS01G0241900	XS06G0064900	0.886462
XS01G0241900	XS10G0122100	0.891482
XS01G0241900	XS07G0222000	0.87193
XS01G0241900	XS09G0156600	0.910462
XS01G0241900	XS14G0017000	0.878369
XS01G0241900	XS11G0097700	0.866227
XS01G0241900	XS10G0027300	0.907349
XS01G0241900	XS03G0020100	0.930739
XS01G0241900	XS11G0188400	0.886196
XS01G0241900	XS03G0019600	0.852976
XS01G0241900	XS10G0044300	0.946564
XS01G0241900	XS14G0045400	0.865343
XS01G0241900	XS13G0176400	0.89268
XS01G0241900	XS14G0002500	0.869158
XS01G0241900	XS12G0015900	0.913425
XS10G0090900	XS13G0264200	0.90568
XS10G0090900	XS02G0058000	0.90036
XS10G0090900	XSUnG0067200	0.87049
XS10G0090900	XSUnG0053700	0.869366
XS10G0090900	XS06G0091600	0.858639
XS10G0090900	XS13G0184800	0.910515
XS10G0090900	XS06G0064900	0.88244
XS10G0090900	XS07G0222000	0.871586
XS10G0090900	XS09G0156600	0.931287
XS10G0090900	XS11G0097700	0.883262
XS10G0090900	XS03G0020100	0.916168
XS10G0090900	XS11G0188400	0.910842
XS10G0090900	XS11G0215300	0.853676
XS10G0090900	XS03G0019600	0.926298
XS10G0090900	XS10G0044300	0.931585
XS10G0090900	XS14G0045400	0.900061
XS10G0090900	XS04G0128300	0.855337
XS10G0090900	XS01G0049200	0.860657
XS10G0090900	XS01G0241900	0.912077
XS10G0090900	XS02G0069200	0.926985
XS10G0090900	XS12G0013000	0.859399
XS10G0090900	XS04G0132300	0.872711
XS10G0090900	XS01G0113100	0.879473
XS10G0090900	XS12G0125600	0.901386
XS02G0223300	XSUnG0210500	0.864477
XS02G0223300	XS13G0264200	0.868645
XS02G0223300	XS12G0240700	0.855575
XS02G0223300	XSUnG0067200	0.905358
XS02G0223300	XS13G0011900	0.896956
XS02G0223300	XSUnG0053700	0.884193
XS02G0223300	XS05G0049800	0.857315
XS02G0223300	XS06G0094800	0.859001
XS02G0223300	XS13G0184800	0.954167
XS02G0223300	XS09G0156600	0.97253
XS02G0223300	XS11G0097700	0.895021
XS02G0223300	XS03G0020100	0.96201
XS02G0223300	XS11G0188400	0.898557
XS02G0223300	XS03G0019600	0.901586
XS02G0223300	XS08G0056400	0.888976
XS02G0223300	XS10G0044300	0.879535
XS02G0223300	XS04G0128300	0.924859
XS02G0223300	XS01G0241900	0.887525
XS02G0223300	XS02G0069200	0.886978
XS02G0223300	XS12G0013000	0.859636
XS02G0223300	XS04G0132300	0.879804
XS02G0223300	XS01G0341200	0.872697
XS02G0223300	XS01G0113100	0.858593
XS02G0223300	XS12G0006400	0.859379
XS02G0223300	XS12G0125600	0.890389
XS02G0223300	XS10G0090900	0.925116
XS02G0223300	XS05G0144400	0.897624
XS02G0223300	XS01G0319800	0.880208
XS03G0048300	XS13G0264200	0.912033
XS03G0048300	XS02G0058000	0.915048
XS03G0048300	XSUnG0067200	0.867448
XS03G0048300	XS06G0036900	0.861464
XS03G0048300	XS13G0011900	0.862555
XS03G0048300	XS10G0209700	0.900041
XS03G0048300	XSUnG0053700	0.859673
XS03G0048300	XS13G0184800	0.885382
XS03G0048300	XS06G0064900	0.898622
XS03G0048300	XS14G0145100	0.873721
XS03G0048300	XS10G0122100	0.853234
XS03G0048300	XS07G0222000	0.887318
XS03G0048300	XS09G0156600	0.893799
XS03G0048300	XS10G0027300	0.851397
XS03G0048300	XS03G0020100	0.868135
XS03G0048300	XS11G0188400	0.873298
XS03G0048300	XS03G0019600	0.892896
XS03G0048300	XS08G0056400	0.892806
XS03G0048300	XS10G0044300	0.88822
XS03G0048300	XS04G0128300	0.877848
XS03G0048300	XS14G0002500	0.861733
XS03G0048300	XS01G0241900	0.907792
XS03G0048300	XS02G0069200	0.875929
XS03G0048300	XS05G0130400	0.851654
XS03G0048300	XS12G0013000	0.870787
XS03G0048300	XS01G0341200	0.879312
XS03G0048300	XS01G0113100	0.878917
XS03G0048300	XS12G0125600	0.913804
XS03G0048300	XS10G0090900	0.89798
XS03G0048300	XS01G0319800	0.855624
XS03G0048300	XS02G0223300	0.886081
XS03G0048300	XS09G0226300	0.895404
XS03G0048300	XS12G0166900	0.867274
XS13G0067200	XS13G0264200	0.867647
XS13G0067200	XS04G0154600	0.868635
XS13G0067200	XSUnG0067200	0.926759
XS13G0067200	XS01G0180100	0.858686
XS13G0067200	XSUnG0053700	0.910145
XS13G0067200	XS06G0091600	0.885269
XS13G0067200	XS13G0034000	0.865363
XS13G0067200	XS06G0094800	0.901838
XS13G0067200	XS13G0184800	0.899986
XS13G0067200	XS06G0064900	0.895728
XS13G0067200	XS10G0122100	0.862226
XS13G0067200	XS07G0222000	0.851867
XS13G0067200	XS09G0156600	0.922249
XS13G0067200	XS03G0020100	0.871786
XS13G0067200	XS11G0188400	0.891789
XS13G0067200	XS03G0019600	0.885267
XS13G0067200	XS14G0045400	0.877979
XS13G0067200	XS02G0069200	0.931943
XS13G0067200	XS12G0013000	0.912542
XS13G0067200	XS08G0169700	0.899039
XS13G0067200	XS12G0006400	0.891772
XS13G0067200	XS12G0125600	0.883717
XS13G0067200	XS10G0090900	0.884724
XS13G0067200	XS01G0100100	0.909839
XS13G0067200	XS01G0319800	0.859289
XS13G0067200	XS07G0072300	0.895547
XS13G0067200	XS05G0066200	0.870474
XS13G0067200	XS02G0223300	0.89168
XS13G0067200	XS13G0141400	0.854256
XS13G0067200	XS09G0226300	0.883239
XS13G0067200	XS08G0001700	0.869852
XS13G0067200	XS12G0166900	0.89145
XS13G0067200	XSUnG0136100	0.866677
XS13G0067200	XS09G0105800	0.906055
XS13G0067200	XS05G0175300	0.910269
XS04G0236400	XSUnG0210500	0.919693
XS04G0236400	XS13G0264200	0.922417
XS04G0236400	XS07G0226900	0.851187
XS04G0236400	XS09G0156600	0.888371
XS04G0236400	XS10G0027300	0.860371
XS04G0236400	XS03G0019600	0.873414
XS04G0236400	XS10G0044300	0.904476
XS04G0236400	XS01G0241900	0.880755
XS04G0236400	XS01G0113100	0.887664
XS04G0236400	XS10G0090900	0.899405
XS04G0236400	XS02G0223300	0.855829
XS04G0236400	XS09G0226300	0.874666
XS04G0236400	XS06G0238400	0.86667
XS04G0236400	XS05G0175300	0.873001
XSUnG0029500	XS13G0264200	0.896119
XSUnG0029500	XS02G0058000	0.941055
XSUnG0029500	XS10G0209700	0.856691
XSUnG0029500	XS06G0091600	0.870967
XSUnG0029500	XS06G0064900	0.879984
XSUnG0029500	XS14G0145100	0.877223
XSUnG0029500	XS07G0222000	0.908918
XSUnG0029500	XS04G0151900	0.884066
XSUnG0029500	XS10G0027300	0.903646
XSUnG0029500	XS04G0172500	0.895962
XSUnG0029500	XS08G0160700	0.90802
XSUnG0029500	XS10G0044300	0.885075
XSUnG0029500	XS14G0002500	0.874022
XSUnG0029500	XS01G0241900	0.85181
XSUnG0029500	XS05G0130400	0.851194
XSUnG0029500	XS12G0125600	0.874425
XSUnG0029500	XS13G0243500	0.859599
XSUnG0029500	XS12G0166900	0.853413
XSUnG0029500	XS03G0048300	0.871062
XSUnG0029500	XS07G0243200	0.904938
XSUnG0029500	XS05G0175300	0.899034
XSUnG0029500	XS13G0009700	0.85813
XSUnG0029500	XS03G0177800	0.853644
XS02G0018100	XSUnG0210500	0.854482
XS02G0018100	XS13G0264200	0.919894
XS02G0018100	XS04G0154600	0.851895
XS02G0018100	XS02G0058000	0.89729
XS02G0018100	XSUnG0067200	0.924703
XS02G0018100	XS01G0180100	0.869258
XS02G0018100	XS13G0011900	0.875645
XS02G0018100	XSUnG0053700	0.912048
XS02G0018100	XS05G0049800	0.867038
XS02G0018100	XS06G0091600	0.893002
XS02G0018100	XS13G0034000	0.8894
XS02G0018100	XS06G0094800	0.866455
XS02G0018100	XS13G0184800	0.936297
XS02G0018100	XS06G0064900	0.925339
XS02G0018100	XS10G0122100	0.865134
XS02G0018100	XS07G0222000	0.878122
XS02G0018100	XS09G0156600	0.971306
XS02G0018100	XS04G0151900	0.864799
XS02G0018100	XS03G0020100	0.918456
XS02G0018100	XS11G0188400	0.91925
XS02G0018100	XS03G0019600	0.922508
XS02G0018100	XS08G0056400	0.881986
XS02G0018100	XS10G0044300	0.905566
XS02G0018100	XS01G0115500	0.866443
XS02G0018100	XS14G0045400	0.889056
XS02G0018100	XS04G0128300	0.871082
XS02G0018100	XS01G0049200	0.858947
XS02G0018100	XS01G0241900	0.873832
XS02G0018100	XS02G0069200	0.934361
XS02G0018100	XS05G0130400	0.857165
XS02G0018100	XS12G0013000	0.936224
XS02G0018100	XS08G0169700	0.887479
XS02G0018100	XS04G0132300	0.903956
XS02G0018100	XS01G0341200	0.89469
XS02G0018100	XS01G0113100	0.850038
XS02G0018100	XS12G0006400	0.879714
XS02G0018100	XS12G0125600	0.924193
XS02G0018100	XS10G0090900	0.958025
XS02G0018100	XS01G0100100	0.882784
XS02G0018100	XS01G0319800	0.856536
XS02G0018100	XS07G0072300	0.869859
XS02G0018100	XS02G0223300	0.95722
XS02G0018100	XS13G0141400	0.865219
XS02G0018100	XS09G0226300	0.920657
XS02G0018100	XS08G0001700	0.876328
XS02G0018100	XS12G0166900	0.887707
XS02G0018100	XS03G0048300	0.908208
XS02G0018100	XS07G0243200	0.895242
XS02G0018100	XS09G0105800	0.87692
XS02G0018100	XS05G0175300	0.958521
XS02G0018100	XS13G0067200	0.938012
XS02G0018100	XS01G0359300	0.89278
XS02G0018100	XS04G0236400	0.89734
XS02G0018100	XS15G0181000	0.857418
XS02G0018100	XS04G0271100	0.870441
XS02G0018100	XSUnG0029500	0.853176
XS02G0018100	XS05G0035700	0.888452
XS12G0069100	XS13G0264200	0.90223
XS12G0069100	XS13G0031800	0.857122
XS12G0069100	XS04G0154600	0.868202
XS12G0069100	XS02G0058000	0.863188
XS12G0069100	XS06G0091600	0.920838
XS12G0069100	XS06G0064900	0.919043
XS12G0069100	XS09G0156600	0.861756
XS12G0069100	XS05G0164600	0.861583
XS12G0069100	XS04G0151900	0.870488
XS12G0069100	XS08G0072500	0.87346
XS12G0069100	XS14G0045400	0.888544
XS12G0069100	XS02G0069200	0.872676
XS12G0069100	XS12G0013000	0.902581
XS12G0069100	XS12G0125600	0.857874
XS12G0069100	XS01G0100100	0.922084
XS12G0069100	XS13G0141400	0.881072
XS12G0069100	XS07G0243200	0.880375
XS12G0069100	XSUnG0136100	0.882893
XS12G0069100	XS05G0175300	0.919934
XS12G0069100	XS13G0067200	0.907182
XS12G0069100	XS04G0271100	0.853568
XS12G0069100	XS03G0306900	0.856468
XS12G0069100	XS05G0035700	0.850207
XS12G0069100	XS02G0018100	0.896253
XSUnG0168600	XS13G0264200	0.89644
XSUnG0168600	XS02G0058000	0.924462
XSUnG0168600	XSUnG0067200	0.885353
XSUnG0168600	XS13G0011900	0.88683
XSUnG0168600	XS10G0209700	0.937607
XSUnG0168600	XSUnG0053700	0.867576
XSUnG0168600	XS13G0184800	0.886674
XSUnG0168600	XSUnG0143000	0.870604
XSUnG0168600	XS06G0064900	0.908071
XSUnG0168600	XS14G0145100	0.861093
XSUnG0168600	XS07G0222000	0.884142
XSUnG0168600	XS09G0156600	0.903726
XSUnG0168600	XS04G0151900	0.854713
XSUnG0168600	XS03G0020100	0.880786
XSUnG0168600	XS11G0188400	0.860751
XSUnG0168600	XS11G0215300	0.886512
XSUnG0168600	XS03G0019600	0.887987
XSUnG0168600	XS08G0160700	0.864711
XSUnG0168600	XS08G0056400	0.906135
XSUnG0168600	XS10G0044300	0.904295
XSUnG0168600	XS14G0002500	0.880382
XSUnG0168600	XS01G0241900	0.889334
XSUnG0168600	XS02G0069200	0.876125
XSUnG0168600	XS05G0130400	0.871664
XSUnG0168600	XS12G0013000	0.891011
XSUnG0168600	XS04G0132300	0.863692
XSUnG0168600	XS01G0341200	0.87128
XSUnG0168600	XS01G0113100	0.865522
XSUnG0168600	XSUnG0067800	0.858333
XSUnG0168600	XS12G0125600	0.91045
XSUnG0168600	XS10G0090900	0.907343
XSUnG0168600	XS01G0319800	0.851946
XSUnG0168600	XS02G0223300	0.890029
XSUnG0168600	XS09G0226300	0.893892
XSUnG0168600	XS08G0001700	0.880606
XSUnG0168600	XS03G0048300	0.943019
XSUnG0168600	XS07G0243200	0.932004
XSUnG0168600	XS08G0019100	0.857048
XSUnG0168600	XS05G0175300	0.905921
XSUnG0168600	XS01G0359300	0.924522
XSUnG0168600	XS03G0177800	0.850837
XSUnG0168600	XS04G0271100	0.866134
XSUnG0168600	XSUnG0029500	0.864428
XSUnG0168600	XS05G0035700	0.897261
XSUnG0168600	XS02G0018100	0.919374
XSUnG0168600	XSUnG0225500	0.87411
XS02G0196700	XS13G0264200	0.938999
XS02G0196700	XS04G0154600	0.86167
XS02G0196700	XS02G0058000	0.919149
XS02G0196700	XS10G0209700	0.852815
XS02G0196700	XS06G0091600	0.914452
XS02G0196700	XS13G0184800	0.889468
XS02G0196700	XS06G0064900	0.935547
XS02G0196700	XS10G0122100	0.878851
XS02G0196700	XS07G0222000	0.891599
XS02G0196700	XS09G0156600	0.913791
XS02G0196700	XS04G0151900	0.923489
XS02G0196700	XS10G0027300	0.873439
XS02G0196700	XS11G0188400	0.892164
XS02G0196700	XS03G0019600	0.858091
XS02G0196700	XS08G0160700	0.853859
XS02G0196700	XS10G0044300	0.912383
XS02G0196700	XS14G0045400	0.899398
XS02G0196700	XS13G0176400	0.860365
XS02G0196700	XS14G0002500	0.888545
XS02G0196700	XS01G0241900	0.875218
XS02G0196700	XS02G0069200	0.904811
XS02G0196700	XS12G0013000	0.919119
XS02G0196700	XS12G0125600	0.915331
XS02G0196700	XS10G0090900	0.917453
XS02G0196700	XS02G0223300	0.857516
XS02G0196700	XS13G0141400	0.8579
XS02G0196700	XS09G0226300	0.910283
XS02G0196700	XS12G0166900	0.874852
XS02G0196700	XS03G0048300	0.890906
XS02G0196700	XS07G0243200	0.905222
XS02G0196700	XS09G0105800	0.852038
XS02G0196700	XS05G0175300	0.940686
XS02G0196700	XS13G0067200	0.881182
XS02G0196700	XS01G0359300	0.877806
XS02G0196700	XS04G0236400	0.8883
XS02G0196700	XS04G0271100	0.878235
XS02G0196700	XSUnG0029500	0.913166
XS02G0196700	XS05G0035700	0.862939
XS02G0196700	XS02G0018100	0.942409
XS02G0196700	XS12G0069100	0.909252
XS02G0196700	XSUnG0168600	0.876223
XS13G0120600	XS05G0182500	0.884864
XS13G0120600	XS13G0120700	0.902226
XS13G0120600	XS08G0226600	0.88987
XS06G0165000	XS06G0036900	0.865438
XS06G0165000	XS02G0008800	0.904966
XS06G0165000	XS05G0142500	0.894238
XS06G0165000	XS13G0120300	0.921114
XS06G0165000	XS02G0097200	0.907303
XS06G0165000	XS02G0274500	0.874211
XS06G0165000	XS11G0215200	0.85115
XS06G0165000	XS12G0077400	0.900871
XS06G0165000	XS04G0079800	0.933685
XS08G0110700	XS06G0036900	0.861002
XS08G0110700	XS02G0008800	0.876708
XS08G0110700	XS13G0120300	0.869577
XS08G0110700	XS02G0097200	0.888912
XS08G0110700	XS01G0356200	0.87177
XS08G0110700	XS12G0077400	0.856779
XS08G0110700	XS03G0048300	0.871763
XS08G0110700	XS04G0079800	0.869527
XS08G0110700	XS08G0193600	0.891205
XS08G0110700	XS06G0165000	0.916921
XS08G0110700	XS09G0028700	0.921313
XS12G0072400	XS06G0036900	0.882738
XS12G0072400	XS13G0120600	0.853265
XS12G0072400	XS02G0097200	0.921254
XS12G0072400	XS12G0077400	0.855762
XS12G0072400	XS06G0165000	0.896087
XS12G0072400	XS09G0028700	0.896875
XS12G0072400	XS08G0110700	0.852213
XS12G0042300	XS05G0000500	0.865446
XS12G0042300	XSUnG0208400	0.856145
XS12G0042300	XS04G0025500	0.890438
XS03G0245600	XS08G0256900	0.911514
XS03G0245600	XS02G0008800	0.888133
XS13G0062300	XS08G0256900	0.968655
XS13G0062300	XS03G0245600	0.925846
XS13G0062600	XS08G0256900	0.924467
XS13G0062600	XS02G0008800	0.928811
XS13G0062600	XS03G0245600	0.970539
XS13G0062600	XS13G0062300	0.912312
XS07G0085400	XS08G0256900	0.973326
XS07G0085400	XS03G0245600	0.943786
XS07G0085400	XS13G0062300	0.987051
XS07G0085400	XS13G0062600	0.946166
XS02G0097200	XS06G0036900	0.865533
XS02G0097200	XS02G0008800	0.961153
XS02G0097200	XS03G0245600	0.876525
XS02G0097200	XS13G0120600	0.902824
XS02G0097200	XS05G0142500	0.862215
XS02G0097200	XS13G0062600	0.906983
XS02G0097200	XS07G0085400	0.856384
XS04G0286300	XS08G0256900	0.948066
XS04G0286300	XS03G0245600	0.919244
XS04G0286300	XS13G0062300	0.983305
XS04G0286300	XS13G0062600	0.894802
XS04G0286300	XS07G0085400	0.965139
XS11G0182400	XS08G0256900	0.918235
XS11G0182400	XS03G0245600	0.944716
XS11G0182400	XS13G0062300	0.963589
XS11G0182400	XS13G0062600	0.906605
XS11G0182400	XS07G0085400	0.947087
XS11G0182400	XS04G0286300	0.973494
XS02G0274500	XS02G0008800	0.863042
XS02G0274500	XS03G0245600	0.890112
XS02G0274500	XS13G0062600	0.893039
XS02G0274500	XS07G0085400	0.870508
XS02G0274500	XS02G0097200	0.88615
XS14G0097400	XS08G0256900	0.936376
XS14G0097400	XS13G0062300	0.951785
XS14G0097400	XS07G0085400	0.94016
XS14G0097400	XS04G0286300	0.934529
XS14G0097400	XS11G0182400	0.88701
XS01G0331600	XS08G0256900	0.905279
XS01G0331600	XS03G0245600	0.932461
XS01G0331600	XS13G0062300	0.945415
XS01G0331600	XS13G0062600	0.87594
XS01G0331600	XS07G0085400	0.928536
XS01G0331600	XS04G0286300	0.966137
XS01G0331600	XS11G0182400	0.969959
XS01G0331600	XS14G0097400	0.87263
XS12G0077400	XS08G0256900	0.879672
XS12G0077400	XS02G0008800	0.976437
XS12G0077400	XS03G0245600	0.94585
XS12G0077400	XS05G0142500	0.882832
XS12G0077400	XS13G0062600	0.970346
XS12G0077400	XS07G0085400	0.904301
XS12G0077400	XS02G0097200	0.957221
XS12G0077400	XS10G0202000	0.888744
XS12G0077400	XS02G0274500	0.918738
XS14G0111600	XS08G0256900	0.955009
XS14G0111600	XS03G0245600	0.976531
XS14G0111600	XS13G0062300	0.976196
XS14G0111600	XS13G0062600	0.966062
XS14G0111600	XS07G0085400	0.981008
XS14G0111600	XS02G0097200	0.857049
XS14G0111600	XS04G0286300	0.975788
XS14G0111600	XS11G0182400	0.977166
XS14G0111600	XS02G0274500	0.866407
XS14G0111600	XS14G0097400	0.901648
XS14G0111600	XS01G0331600	0.956137
XS14G0111600	XS03G0301000	0.920298
XS14G0111600	XS15G0123100	0.864175
XS14G0111600	XS12G0077400	0.919395
XS14G0111600	XS10G0135900	0.905117
XS08G0206200	XS08G0256900	0.898785
XS08G0206200	XS03G0245600	0.879809
XS08G0206200	XS13G0062300	0.911195
XS08G0206200	XS13G0062600	0.897409
XS08G0206200	XS07G0085400	0.915899
XS08G0206200	XS04G0286300	0.905975
XS08G0206200	XS11G0182400	0.862128
XS08G0206200	XS14G0097400	0.876545
XS08G0206200	XS01G0331600	0.859748
XS08G0206200	XS15G0123100	0.880533
XS08G0206200	XS12G0077400	0.857847
XS08G0206200	XS14G0111600	0.914324
XS01G0407800	XS08G0256900	0.916041
XS01G0407800	XS03G0245600	0.910996
XS01G0407800	XS13G0062300	0.962794
XS01G0407800	XS13G0062600	0.895294
XS01G0407800	XS07G0085400	0.946549
XS01G0407800	XS04G0286300	0.973244
XS01G0407800	XS11G0182400	0.953879
XS01G0407800	XS14G0097400	0.898084
XS01G0407800	XS01G0331600	0.936008
XS01G0407800	XS03G0301000	0.928375
XS01G0407800	XS15G0123100	0.884214
XS01G0407800	XS10G0135900	0.913464
XS01G0407800	XS14G0111600	0.96249
XS01G0407800	XS08G0206200	0.896865
XS10G0202200	XS08G0256900	0.858834
XS10G0202200	XS02G0008800	0.941989
XS10G0202200	XS03G0245600	0.952219
XS10G0202200	XS13G0062600	0.97069
XS10G0202200	XS07G0085400	0.892291
XS10G0202200	XS02G0097200	0.944196
XS10G0202200	XS10G0202000	0.954316
XS10G0202200	XS11G0182400	0.86055
XS10G0202200	XS02G0274500	0.896442
XS10G0202200	XS12G0077400	0.971663
XS10G0202200	XS14G0111600	0.926715
XS08G0230700	XS08G0256900	0.864432
XS08G0230700	XS03G0245600	0.879787
XS08G0230700	XS13G0062300	0.892305
XS08G0230700	XS13G0062600	0.853394
XS08G0230700	XS07G0085400	0.900873
XS08G0230700	XS04G0286300	0.883396
XS08G0230700	XS11G0182400	0.887783
XS08G0230700	XS01G0331600	0.920439
XS08G0230700	XS14G0111600	0.895434
XS08G0230700	XS01G0407800	0.857331
XS08G0230700	XS14G0087000	0.855797
XS13G0144900	XS08G0256900	0.948675
XS13G0144900	XS02G0008800	0.916617
XS13G0144900	XS03G0245600	0.966942
XS13G0144900	XS13G0062300	0.941832
XS13G0144900	XS13G0062600	0.972734
XS13G0144900	XS07G0085400	0.972875
XS13G0144900	XS02G0097200	0.923081
XS13G0144900	XS04G0286300	0.922606
XS13G0144900	XS11G0182400	0.904171
XS13G0144900	XS02G0274500	0.931201
XS13G0144900	XS14G0097400	0.880334
XS13G0144900	XS01G0331600	0.897556
XS13G0144900	XS12G0077400	0.97297
XS13G0144900	XS14G0111600	0.969422
XS13G0144900	XS08G0206200	0.914439
XS13G0144900	XS01G0407800	0.90612
XS13G0144900	XS10G0202200	0.946093
XS13G0144900	XS08G0230700	0.863688
XS09G0028700	XS02G0058000	0.870699
XS09G0028700	XS06G0036900	0.907736
XS09G0028700	XS02G0008800	0.868326
XS09G0028700	XS11G0215300	0.86777
XS09G0028700	XS05G0142500	0.874659
XS09G0028700	XS13G0174300	0.879946
XS09G0028700	XS13G0120300	0.930082
XS09G0028700	XS07G0027700	0.880783
XS09G0028700	XS02G0097200	0.881956
XS09G0028700	XS01G0356200	0.85606
XS09G0028700	XS11G0215200	0.874688
XS09G0028700	XS03G0048300	0.854213
XS09G0028700	XS04G0079800	0.967761
XS09G0028700	XS06G0165000	0.962262
XS13G0098400	XS06G0036900	0.893847
XS13G0098400	XS09G0028700	0.87005
XS12G0027200	XS03G0261400	0.869713
XS05G0042400	XS12G0027200	0.868316
XS05G0042400	XS08G0245200	0.858172
XS05G0042400	XS12G0034400	0.857907
XS05G0042400	XS06G0187000	0.866913
XS05G0042400	XS06G0135100	0.908584
XS13G0205200	XSUnG0101100	0.86294
XS13G0205200	XS08G0223300	0.863168
XS13G0205200	XS05G0156200	0.876414
XS13G0205200	XS14G0076100	0.954527
XS13G0205200	XS06G0135100	0.87731
XS13G0205200	XS05G0042400	0.901728
XS13G0205200	XS03G0322700	0.950283
XS13G0205200	XS04G0256100	0.904431
XS01G0024200	XS12G0027200	0.899863
XS01G0024200	XSUnG0101100	0.87618
XS01G0024200	XS08G0223300	0.869399
XS01G0024200	XS08G0245200	0.870528
XS01G0024200	XS14G0076100	0.902053
XS01G0024200	XS06G0187000	0.851232
XS01G0024200	XS06G0135100	0.902159
XS01G0024200	XS05G0042400	0.963075
XS01G0024200	XS03G0322700	0.907476
XS01G0024200	XS04G0256100	0.916407
XS01G0024200	XS13G0205200	0.956438
XS01G0024200	XS01G0197600	0.85941
XS01G0024200	XS05G0119200	0.868353
XS13G0171400	XSUnG0101100	0.884088
XS13G0171400	XS08G0223300	0.865339
XS13G0171400	XS14G0076100	0.937751
XS13G0171400	XS05G0042400	0.879236
XS13G0171400	XS03G0322700	0.902609
XS13G0171400	XS04G0256100	0.887635
XS13G0171400	XS13G0205200	0.944876
XS13G0171400	XS01G0024200	0.911602
XSUnG0227500	XS14G0076100	0.889867
XSUnG0227500	XS13G0200100	0.888571
XSUnG0227500	XS05G0085400	0.928727
XSUnG0227500	XS05G0042400	0.916552
XSUnG0227500	XS03G0322700	0.88407
XSUnG0227500	XS04G0256100	0.855951
XSUnG0227500	XS13G0205200	0.945271
XSUnG0227500	XS07G0096100	0.921261
XSUnG0227500	XS01G0024200	0.963709
XSUnG0227500	XS13G0171400	0.889045
XSUnG0227500	XS01G0260900	0.911663
XSUnG0227500	XS08G0234000	0.934314
XS12G0007800	XS12G0027200	0.931461
XS12G0007800	XSUnG0101100	0.864824
XS12G0007800	XS08G0223300	0.892072
XS12G0007800	XS08G0245200	0.957523
XS12G0007800	XS10G0163600	0.861605
XS12G0007800	XS01G0000400	0.905592
XS12G0007800	XS12G0034400	0.855542
XS12G0007800	XS13G0052300	0.858786
XS12G0007800	XS06G0264200	0.855074
XS12G0007800	XS06G0187000	0.861649
XS12G0007800	XS05G0042400	0.887069
XS12G0007800	XSUnG0097700	0.852697
XS12G0007800	XS01G0197600	0.911386
XS12G0007800	XS04G0071600	0.867865
XS12G0007800	XS05G0119200	0.908383
XS12G0007800	XS08G0223600	0.888377
XS12G0007800	XS11G0215800	0.891756
XS12G0007800	XS01G0024200	0.915999
XS12G0007800	XS01G0260900	0.856222
XS12G0007800	XS05G0179800	0.944832
XS12G0007800	XS13G0194400	0.872784
XS12G0007800	XS08G0180500	0.908111
XS12G0007800	XSUnG0247300	0.861619
XS12G0007800	XS01G0024100	0.915069
XS04G0188500	XSUnG0101100	0.870761
XS04G0188500	XS14G0076100	0.898648
XS04G0188500	XS13G0200100	0.873461
XS04G0188500	XS05G0085400	0.858815
XS04G0188500	XS05G0042400	0.920765
XS04G0188500	XS03G0322700	0.87982
XS04G0188500	XS04G0256100	0.856104
XS04G0188500	XS13G0205200	0.933524
XS04G0188500	XS07G0096100	0.851316
XS04G0188500	XS01G0024200	0.951633
XS04G0188500	XS13G0171400	0.92208
XS04G0188500	XS01G0260900	0.889426
XS04G0188500	XS08G0234000	0.943254
XS04G0188500	XSUnG0227500	0.950081
XS04G0188500	XS12G0007800	0.862582
XS08G0234000	XS14G0076100	0.859554
XS08G0234000	XS13G0200100	0.942132
XS08G0234000	XS05G0085400	0.884297
XS08G0234000	XS05G0042400	0.857084
XS08G0234000	XS13G0205200	0.873701
XS08G0234000	XS07G0096100	0.895816
XS08G0234000	XS01G0024200	0.889141
XS08G0234000	XS13G0171400	0.879461
XS05G0179800	XS12G0027200	0.875713
XS05G0179800	XS08G0223300	0.881475
XS05G0179800	XS08G0245200	0.904482
XS05G0179800	XS01G0000400	0.909088
XS05G0179800	XS12G0034400	0.873511
XS05G0179800	XS05G0042400	0.867259
XS05G0179800	XS01G0197600	0.866905
XS05G0179800	XS03G0261400	0.850829
XS05G0179800	XS05G0119200	0.862861
XS05G0179800	XS08G0223600	0.880921
XS05G0179800	XS01G0024200	0.899701
XS05G0179800	XS13G0171400	0.874379
XS15G0104200	XS12G0027200	0.867794
XS15G0104200	XS08G0245200	0.861703
XS15G0104200	XS12G0034400	0.887752
XS15G0104200	XS05G0042400	0.942153
XS15G0104200	XS13G0205200	0.87617
XS15G0104200	XS01G0024200	0.935986
XS15G0104200	XS13G0171400	0.90112
XS15G0104200	XS01G0260900	0.862372
XS15G0104200	XS08G0234000	0.88248
XS15G0104200	XS05G0179800	0.934388
XS15G0104200	XSUnG0227500	0.884201
XS15G0104200	XS08G0180500	0.892071
XS15G0104200	XSUnG0247300	0.882659
XS15G0104200	XS12G0007800	0.903491
XS15G0104200	XS04G0188500	0.903069
XS06G0179300	XS08G0234000	0.871974
XS06G0179300	XS05G0179800	0.856468
XS06G0179300	XS15G0104200	0.891251
XS13G0120700	XS05G0182500	0.942808
XS13G0120700	XSUnG0067800	0.910534
XS13G0120700	XS08G0168000	0.881717
XS05G0040600	XS02G0157100	0.89885
XS05G0040600	XS11G0198400	0.919469
XS05G0040600	XS02G0157400	0.914377
XS05G0058300	XS05G0182500	0.953601
XS05G0058300	XS13G0120700	0.901957
XS05G0058300	XS11G0052500	0.856271
XS05G0058300	XS02G0157100	0.915899
XS05G0058300	XSUnG0067800	0.949469
XS05G0058300	XS02G0073500	0.905986
XS12G0128100	XS05G0182500	0.946378
XS12G0128100	XS13G0120700	0.926798
XS12G0128100	XS02G0058000	0.866835
XS12G0128100	XS05G0058300	0.94488
XS12G0128100	XS14G0145100	0.900333
XS12G0128100	XS10G0052200	0.893086
XS12G0128100	XS07G0222000	0.854656
XS12G0128100	XS13G0120600	0.857043
XS12G0128100	XS02G0157100	0.912942
XS12G0128100	XSUnG0067800	0.919001
XS12G0128100	XS02G0073500	0.873192
XS04G0172500	XS02G0058000	0.875081
XS04G0172500	XS05G0040600	0.866474
XS04G0172500	XS05G0058300	0.851448
XS04G0172500	XS14G0145100	0.851751
XS04G0172500	XS05G0104700	0.853794
XS04G0172500	XS02G0157100	0.880063
XS04G0172500	XSUnG0067800	0.853095
XS06G0059900	XS05G0182500	0.85757
XS06G0059900	XS02G0058000	0.852878
XS06G0059900	XS05G0040600	0.943929
XS06G0059900	XS05G0058300	0.906694
XS06G0059900	XS08G0226600	0.85647
XS06G0059900	XS01G0122700	0.885766
XS06G0059900	XS13G0053600	0.899524
XS06G0059900	XS12G0128100	0.87077
XS06G0059900	XS04G0172500	0.874701
XS06G0059900	XS02G0157100	0.931005
XS06G0059900	XSUnG0067800	0.893953
XS06G0059900	XS11G0198400	0.889136
XS06G0059900	XS02G0157400	0.887717
XS01G0282300	XS05G0182500	0.92234
XS01G0282300	XS05G0058300	0.976076
XS01G0282300	XS14G0069300	0.894081
XS01G0282300	XS12G0128100	0.911361
XS01G0282300	XS06G0059900	0.863255
XS01G0282300	XS07G0226100	0.855011
XS01G0282300	XS02G0157100	0.913198
XS01G0282300	XS05G0042600	0.857761
XS01G0282300	XSUnG0067800	0.91426
XS01G0282300	XS02G0073500	0.909484
XS13G0174300	XS02G0058000	0.86831
XS13G0174300	XS05G0040600	0.882651
XS13G0174300	XS01G0383000	0.877245
XS13G0174300	XS06G0039700	0.89352
XS13G0174300	XS04G0172500	0.856293
XS13G0174300	XS06G0059900	0.868154
XS13G0174300	XS02G0157100	0.907725
XS13G0174300	XS11G0215300	0.883064
XS13G0174300	XS07G0027700	0.894094
XS13G0174300	XS11G0198200	0.861386
XS13G0174300	XS02G0157400	0.916857
XS07G0007100	XS05G0182500	0.921218
XS07G0007100	XS02G0058000	0.855693
XS07G0007100	XS01G0180100	0.889355
XS07G0007100	XS05G0058300	0.932144
XS07G0007100	XS01G0344000	0.886819
XS07G0007100	XS14G0069300	0.929172
XS07G0007100	XS12G0128100	0.866286
XS07G0007100	XS05G0104700	0.929457
XS07G0007100	XS04G0151900	0.878816
XS07G0007100	XS04G0172500	0.85273
XS07G0007100	XS06G0059900	0.88891
XS07G0007100	XS02G0157100	0.932729
XS07G0007100	XS05G0042600	0.869485
XS07G0007100	XS10G0158600	0.908261
XS07G0007100	XS01G0282300	0.919595
XS07G0007100	XS07G0115300	0.872489
XS07G0007100	XS12G0013000	0.8859
XS07G0007100	XSUnG0067800	0.895578
XS07G0007100	XS13G0141400	0.864934
XS07G0007100	XS02G0157400	0.856501
XS10G0136300	XS05G0182500	0.95592
XS10G0136300	XS13G0120700	0.880484
XS10G0136300	XS11G0052500	0.860636
XS10G0136300	XSUnG0053700	0.859389
XS10G0136300	XS05G0058300	0.910766
XS10G0136300	XS07G0222000	0.86533
XS10G0136300	XS14G0069300	0.875861
XS10G0136300	XS12G0128100	0.920668
XS10G0136300	XS05G0042600	0.862163
XS10G0136300	XS01G0282300	0.908323
XS10G0136300	XS11G0105500	0.94396
XS10G0136300	XS03G0099700	0.878093
XS10G0136300	XSUnG0067800	0.881593
XS10G0136300	XS07G0282100	0.851525
XS10G0136300	XS02G0073500	0.895821
XS13G0243500	XS05G0182500	0.925873
XS13G0243500	XS13G0120700	0.891961
XS13G0243500	XS02G0058000	0.875132
XS13G0243500	XS10G0209700	0.876963
XS13G0243500	XS05G0058300	0.859717
XS13G0243500	XS14G0145100	0.916054
XS13G0243500	XS10G0202400	0.87656
XS13G0243500	XS10G0052200	0.85755
XS13G0243500	XS07G0222000	0.918586
XS13G0243500	XS12G0128100	0.947341
XS13G0243500	XS08G0160700	0.918359
XS13G0243500	XS10G0136300	0.920245
XS13G0243500	XSUnG0067800	0.858055
XS13G0243500	XS01G0358600	0.898249
XS13G0243500	XS03G0247400	0.868335
XS13G0243500	XS07G0282100	0.868698
XS05G0104400	XS05G0058300	0.879509
XS05G0104400	XS14G0069300	0.868581
XS05G0104400	XS12G0128100	0.866031
XS05G0104400	XS06G0059900	0.865435
XS05G0104400	XS02G0157100	0.957955
XS05G0104400	XS05G0258600	0.873732
XS05G0104400	XS01G0282300	0.912214
XS05G0104400	XS11G0124000	0.936373
XS05G0104400	XS07G0007100	0.895319
XS05G0104400	XS02G0157400	0.929342
XS08G0162900	XS05G0182500	0.906446
XS08G0162900	XS05G0058300	0.928901
XS08G0162900	XS14G0069300	0.916451
XS08G0162900	XS12G0128100	0.909615
XS08G0162900	XS02G0157100	0.911998
XS08G0162900	XS05G0042600	0.858529
XS08G0162900	XS01G0282300	0.943377
XS08G0162900	XS11G0124000	0.860967
XS08G0162900	XS11G0105500	0.866656
XS08G0162900	XS07G0007100	0.901905
XS08G0162900	XS10G0136300	0.91981
XS08G0162900	XSUnG0067800	0.889915
XS08G0162900	XS13G0243500	0.852552
XS08G0162900	XS05G0104400	0.922754
XS08G0162900	XS02G0073500	0.934832
XS06G0122500	XS10G0209700	0.881814
XS06G0122500	XSUnG0053700	0.86359
XS06G0122500	XS07G0222000	0.866945
XS06G0122500	XS14G0069300	0.931986
XS06G0122500	XS07G0226100	0.899067
XS06G0122500	XS02G0157100	0.850406
XS06G0122500	XS08G0160700	0.855959
XS06G0122500	XS11G0105500	0.851817
XS06G0122500	XS10G0136300	0.882326
XS06G0122500	XS05G0130400	0.880596
XS06G0122500	XSUnG0067800	0.876898
XS06G0122500	XS01G0358600	0.865565
XS06G0122500	XS13G0243500	0.868185
XS06G0122500	XS05G0104400	0.855298
XS06G0122500	XS08G0162900	0.884629
XS06G0122500	XS08G0019100	0.860956
XS06G0122500	XS07G0033800	0.875647
XS05G0221200	XS02G0058000	0.901912
XS05G0221200	XS05G0040600	0.877304
XS05G0221200	XS10G0209700	0.85727
XS05G0221200	XS14G0145100	0.900117
XS05G0221200	XS06G0039700	0.875547
XS05G0221200	XS01G0122700	0.85335
XS05G0221200	XS05G0164600	0.856099
XS05G0221200	XS05G0104700	0.869461
XS05G0221200	XS04G0151900	0.8589
XS05G0221200	XS04G0172500	0.859592
XS05G0221200	XS06G0059900	0.850645
XS05G0221200	XS11G0215300	0.950885
XS05G0221200	XS14G0002500	0.858955
XS05G0221200	XS13G0174300	0.904003
XS05G0221200	XS03G0186900	0.871332
XS05G0221200	XS07G0027700	0.926575
XS05G0221200	XS05G0130400	0.89698
XS05G0221200	XS11G0198200	0.850784
XS05G0221200	XSUnG0067800	0.872478
XS05G0221200	XS02G0233800	0.851723
XS05G0221200	XS15G0123600	0.874836
XS05G0221200	XS11G0051300	0.85908
XS05G0221200	XS07G0243200	0.924645
XS05G0221200	XS13G0009700	0.897206
XS05G0221200	XS03G0177800	0.860051
XS13G0120200	XS05G0040600	0.852173
XS13G0120200	XS05G0058300	0.868267
XS13G0120200	XS14G0069300	0.918179
XS13G0120200	XS05G0104700	0.899207
XS13G0120200	XS06G0059900	0.895569
XS13G0120200	XS02G0157100	0.966376
XS13G0120200	XS05G0258600	0.869189
XS13G0120200	XS01G0282300	0.877338
XS13G0120200	XS11G0124000	0.892403
XS13G0120200	XS13G0174300	0.865566
XS13G0120200	XS13G0120300	0.852766
XS13G0120200	XS07G0007100	0.944174
XS13G0120200	XSUnG0067800	0.866209
XS13G0120200	XS03G0247400	0.873557
XS13G0120200	XS11G0215200	0.870128
XS13G0120200	XS05G0104400	0.951138
XS13G0120200	XS08G0162900	0.908806
XS13G0120200	XS02G0157400	0.930067
XS13G0120200	XS06G0122500	0.87318
XS13G0120200	XS06G0119800	0.866997
XS13G0120200	XS05G0035700	0.853686
XS05G0235700	XS05G0182500	0.920014
XS05G0235700	XS13G0120700	0.8912
XS05G0235700	XS02G0058000	0.902966
XS05G0235700	XS05G0040600	0.866323
XS05G0235700	XS10G0209700	0.86436
XS05G0235700	XS05G0058300	0.941325
XS05G0235700	XS14G0145100	0.915879
XS05G0235700	XS06G0148800	0.857945
XS05G0235700	XS10G0052200	0.912825
XS05G0235700	XS07G0222000	0.865486
XS05G0235700	XS14G0069300	0.854017
XS05G0235700	XS12G0128100	0.95376
XS05G0235700	XS05G0104700	0.891597
XS05G0235700	XS04G0151900	0.88327
XS05G0235700	XS04G0172500	0.880195
XS05G0235700	XS06G0059900	0.862349
XS05G0235700	XS02G0157100	0.927431
XS05G0235700	XS01G0282300	0.900937
XS05G0235700	XS13G0174300	0.877842
XS05G0235700	XS07G0007100	0.898518
XS05G0235700	XS10G0136300	0.860305
XS05G0235700	XS05G0130400	0.902605
XS05G0235700	XSUnG0067800	0.907462
XS05G0235700	XS13G0243500	0.913585
XS05G0235700	XS05G0104400	0.873759
XS05G0235700	XS08G0162900	0.881393
XS05G0235700	XS10G0093600	0.875633
XS05G0235700	XS07G0243200	0.857793
XS05G0235700	XS02G0157400	0.869381
XS05G0235700	XS07G0033800	0.863672
XS05G0235700	XS05G0127800	0.859734
XS05G0235700	XS06G0122500	0.858658
XS05G0235700	XS05G0221200	0.874844
XS05G0235700	XS05G0035700	0.891197
XS05G0235700	XSUnG0225500	0.86284
XS05G0235700	XS13G0120200	0.868771
XS05G0235700	XS13G0248000	0.898165
XS06G0135100	XS12G0027200	0.856661
XS06G0135100	XS08G0223300	0.862817
XS06G0135100	XS05G0156200	0.915202
XS06G0135100	XS06G0187000	0.900573
XS04G0256100	XSUnG0101100	0.852122
XS04G0256100	XS08G0223300	0.906923
XS04G0256100	XS05G0156200	0.919101
XS04G0256100	XS14G0076100	0.860664
XS04G0256100	XS06G0187000	0.948239
XS04G0256100	XS06G0135100	0.945557
XS04G0256100	XS05G0181500	0.89689
XS04G0256100	XS05G0042400	0.917591
XS04G0256100	XS03G0322700	0.885957
XS04G0256100	XS08G0175700	0.858826
XS04G0256100	XS05G0008800	0.906307
XS13G0215500	XS06G0012400	0.897852
XS13G0215500	XS05G0012100	0.876545
XS13G0215500	XS12G0070900	0.852632
XS13G0215500	XS13G0079700	0.919718
XS13G0215500	XS01G0296900	0.86403
XS13G0215500	XS07G0033700	0.900913
XS13G0215500	XS12G0244200	0.890746
XS13G0215500	XS01G0232500	0.912992
XS13G0215500	XS03G0218400	0.886956
XS13G0215500	XS03G0218500	0.890058
XS13G0215500	XS01G0403900	0.87633
XS13G0215500	XS13G0035600	0.853231
XS01G0260900	XS12G0027200	0.854385
XS01G0260900	XSUnG0101100	0.859235
XS01G0260900	XS08G0223300	0.909182
XS01G0260900	XS08G0245200	0.853664
XS01G0260900	XS05G0156200	0.890027
XS01G0260900	XS14G0076100	0.873768
XS01G0260900	XS01G0000400	0.852636
XS01G0260900	XS06G0187000	0.925354
XS01G0260900	XS06G0135100	0.924359
XS01G0260900	XS05G0181500	0.865009
XS01G0260900	XS05G0042400	0.930913
XS01G0260900	XS03G0322700	0.909799
XS01G0260900	XS05G0008800	0.901876
XS01G0260900	XS04G0256100	0.96908
XS01G0260900	XS13G0205200	0.939553
XS01G0260900	XS01G0197600	0.851356
XS01G0260900	XS02G0056600	0.887149
XS01G0260900	XS05G0119200	0.872441
XS01G0260900	XS08G0223600	0.872057
XS01G0260900	XS01G0315600	0.866671
XS01G0260900	XS01G0024200	0.945133
XS01G0260900	XS13G0171400	0.905886
[truncated: 5,516 more rows]

## Sheet: Supplementary Table 8
Supplementary Table 8. Data (node pairs and PCC values) for regenerating the TO-GCN subnetwork related to the very long-chain fatty acid (VCLFA) biosynthesis in fruit.
Source geneID	Target geneID	PCC
XS01G0277900	XS11G0022900	0.820762
XS01G0406400	XS05G0227400	0.821161
XS01G0277900	XS07G0026500	0.813472
XS11G0022900	XS02G0051900	0.886864
XS11G0022900	XS03G0261400	0.814599
XS11G0022900	XS04G0003400	0.896039
XS11G0022900	XS07G0026500	0.932612
XS07G0026500	XS02G0051900	0.807698
XS05G0081800	XS02G0057100	0.80933
XS05G0081800	XS04G0167300	0.805874
XS05G0081800	XS12G0210500	0.880384
XS07G0026500	XS04G0003400	0.850893
XS05G0081800	XS10G0145900	0.889298
XS07G0057300	XS04G0003400	0.833927
XS07G0057300	XS11G0022900	0.826511
XS07G0057300	XS07G0026500	0.845264
XS05G0006600	XS03G0261400	0.813766
XS05G0006600	XS05G0227400	0.871266
XS05G0006600	XS11G0022900	0.826409
XS09G0172000	XS02G0057900	0.80202
XS09G0172000	XS07G0057300	0.883426
XS09G0172000	XS02G0057100	0.817093
XS09G0172000	XS02G0051900	0.810088
XS09G0172000	XS04G0167300	0.863936
XS09G0172000	XS10G0145900	0.892
XS09G0172000	XS04G0003400	0.801643
XS09G0172000	XS11G0022900	0.88867
XS09G0172000	XS07G0026500	0.915908
XS03G0296800	XS02G0057100	0.856395
XS02G0057600	XS04G0240800	0.908126
XS02G0057600	XS08G0125500	0.849853
XS03G0296800	XS02G0051900	0.919868
XS03G0296800	XS02G0057700	0.971645
XS03G0296800	XS04G0167300	0.92847
XS03G0296800	XS12G0210500	0.880629
XS02G0057600	XS01G0277900	0.953357
XS02G0057600	XS05G0081800	0.900735
XS03G0296800	XS11G0022900	0.886374
XS03G0296800	XS07G0026500	0.826405
XS02G0057600	XS09G0172000	0.82513
XS02G0057600	XS03G0296800	0.859133
XS09G0241100	XS03G0261400	0.814402
XS02G0057600	XS02G0057900	0.838195
XS02G0057600	XS02G0057100	0.95471
XS02G0057900	XS02G0057100	0.89296
XS09G0241100	XSUnG0025000	0.909571
XS02G0057900	XS04G0167300	0.910836
XS02G0057600	XS02G0057700	0.821759
XS02G0057600	XS04G0167300	0.919148
XS02G0057600	XS12G0210500	0.930458
XS09G0241100	XS04G0003400	0.904784
XS02G0057100	XS01G0406400	0.835542
XS02G0057600	XS10G0145900	0.94649
XS09G0241100	XS11G0022900	0.834818
XS02G0057100	XS02G0057700	0.863475
XS02G0057100	XS04G0167300	0.92882
XS02G0057100	XS12G0210500	0.826543
XS02G0057100	XS10G0145900	0.906245
XS02G0057100	XS05G0227400	0.821235
XS04G0240800	XS08G0125500	0.815288
XS02G0057100	XS11G0022900	0.818468
XS02G0057100	XS07G0026500	0.825115
XS04G0240800	XS01G0277900	0.87055
XS04G0240800	XS05G0081800	0.800981
XS04G0240800	XS09G0172000	0.908335
XS04G0240800	XS03G0296800	0.85069
XS02G0057700	XS02G0051900	0.908944
XS04G0240800	XS02G0057900	0.808255
XS02G0057700	XS03G0261400	0.802802
XS04G0240800	XS02G0057100	0.901863
XS02G0057700	XS04G0167300	0.895119
XS04G0240800	XS02G0051900	0.861544
XS02G0057700	XS12G0210500	0.805257
XS04G0240800	XS02G0057700	0.845697
XS04G0240800	XS04G0167300	0.911728
XS04G0240800	XS12G0210500	0.820484
XS04G0240800	XS05G0102500	0.824242
XS02G0057700	XSUnG0025000	0.817328
XS04G0240800	XS10G0145900	0.902012
XS04G0240800	XSUnG0025000	0.801958
XS02G0057700	XS05G0227400	0.863817
XS04G0240800	XS05G0227400	0.87501
XS04G0240800	XS11G0022900	0.888495
XS02G0057700	XS11G0022900	0.890475
XS04G0240800	XS07G0026500	0.85472
XS04G0167300	XS02G0051900	0.873244
XS08G0125500	XS02G0057900	0.831053
XS04G0167300	XS12G0210500	0.827781
XS08G0125500	XS02G0057100	0.823583
XS08G0125500	XS04G0167300	0.810821
XS04G0167300	XS10G0145900	0.884466
XS08G0125500	XS10G0145900	0.872921
XS04G0167300	XS11G0022900	0.818255
XS04G0167300	XS07G0026500	0.83236
XS12G0210500	XS10G0145900	0.836545
XS12G0210500	XS11G0022900	0.8036
XSUnG0025000	XS02G0051900	0.81629
XSUnG0025000	XS03G0261400	0.850052
XS01G0190800	XS03G0296800	0.839297
XS01G0190800	XS02G0051900	0.892919
XS01G0190800	XS02G0057700	0.856927
XSUnG0025000	XS04G0003400	0.92896
XSUnG0025000	XS05G0227400	0.840392
XSUnG0025000	XS11G0022900	0.870397
XSUnG0025000	XS07G0026500	0.810397
XS01G0190800	XS11G0022900	0.806631
XS01G0277900	XS05G0081800	0.873471
XS01G0277900	XS03G0296800	0.865136
XS01G0277900	XS02G0057900	0.801235
XS01G0277900	XS02G0057100	0.958812
XS01G0277900	XS02G0057700	0.857274
XS01G0277900	XS04G0167300	0.889822
XS01G0277900	XS12G0210500	0.899258
XS05G0227400	XS03G0261400	0.871092
XS05G0227400	XS11G0022900	0.891979
XS01G0277900	XS10G0145900	0.898098
XS05G0227400	XS07G0026500	0.815166
XS01G0406400	XS05G0102500	0.862869
XS01G0277900	XS05G0227400	0.815854
XS01G0406400	XSUnG0025000	0.825816

## Sheet: Supplementary Table 9
Supplementary Table 9. Predicted motifs for genes in the sub-network in the fruit.
SequenceName	Start	Stop	Strand	Score	P.value	Q.value	MatchedSequence	PatternName	Family	Matrix_id	Species	Method	Datasource	DatasourceID
XS03G0261400	1461	1480	-	18.1667	1.38e-07	0.00298	GAGAGAGAGACAGAGACAGA	AT2G01570	GRAS	MP00611	Arabidopsis_thaliana	ChIP-seq	SRA:SRX647776	SRX647776
XS10G0145900	1301	1320	+	17.9167	1.83e-07	0.00298	AAAAAAAAGAAAAAAAAAGA	AT2G01570	GRAS	MP00611	Arabidopsis_thaliana	ChIP-seq	SRA:SRX647776	SRX647776
XS10G0145900	1309	1328	+	17.4861	2.91e-07	0.00298	GAAAAAAAAAGAAAAAAAAG	AT2G01570	GRAS	MP00611	Arabidopsis_thaliana	ChIP-seq	SRA:SRX647776	SRX647776
XS11G0022900	1846	1865	-	17.3333	3.42e-07	0.00298	AAAAAAAAAACAGAAGAAGA	AT2G01570	GRAS	MP00611	Arabidopsis_thaliana	ChIP-seq	SRA:SRX647776	SRX647776
XS05G0102500	1903	1922	+	17.3333	3.42e-07	0.00298	AAAAAAAAGAAAAAAAAAAG	AT2G01570	GRAS	MP00611	Arabidopsis_thaliana	ChIP-seq	SRA:SRX647776	SRX647776
XS10G0145900	1292	1311	+	16.7917	5.95e-07	0.00298	AAAAAAAAGAAAAAAAAGAA	AT2G01570	GRAS	MP00611	Arabidopsis_thaliana	ChIP-seq	SRA:SRX647776	SRX647776
XS10G0145900	1311	1330	+	16.7917	5.95e-07	0.00298	AAAAAAAAGAAAAAAAAGAA	AT2G01570	GRAS	MP00611	Arabidopsis_thaliana	ChIP-seq	SRA:SRX647776	SRX647776
XS04G0240800	514	533	-	16.625	7.01e-07	0.00298	GAGAGAGAGAGAGAGAGAGA	AT2G01570	GRAS	MP00611	Arabidopsis_thaliana	ChIP-seq	SRA:SRX647776	SRX647776
XS02G0051900	628	647	-	16.625	7.01e-07	0.00298	GAGAGAGAGAGAGAGAGAGA	AT2G01570	GRAS	MP00611	Arabidopsis_thaliana	ChIP-seq	SRA:SRX647776	SRX647776
XS02G0051900	630	649	-	16.625	7.01e-07	0.00298	GAGAGAGAGAGAGAGAGAGA	AT2G01570	GRAS	MP00611	Arabidopsis_thaliana	ChIP-seq	SRA:SRX647776	SRX647776
XS02G0051900	632	651	-	16.625	7.01e-07	0.00298	GAGAGAGAGAGAGAGAGAGA	AT2G01570	GRAS	MP00611	Arabidopsis_thaliana	ChIP-seq	SRA:SRX647776	SRX647776
XS02G0051900	634	653	-	16.625	7.01e-07	0.00298	GAGAGAGAGAGAGAGAGAGA	AT2G01570	GRAS	MP00611	Arabidopsis_thaliana	ChIP-seq	SRA:SRX647776	SRX647776
XS02G0051900	636	655	-	16.5278	7.71e-07	0.00305	AAGAGAGAGAGAGAGAGAGA	AT2G01570	GRAS	MP00611	Arabidopsis_thaliana	ChIP-seq	SRA:SRX647776	SRX647776
XS02G0057100	1901	1920	+	16.3611	9.06e-07	0.00338	AAGAAGAGGAAAAAAAAAAA	AT2G01570	GRAS	MP00611	Arabidopsis_thaliana	ChIP-seq	SRA:SRX647776	SRX647776
XS10G0145900	1299	1318	+	16.2222	1.03e-06	0.00369	AGAAAAAAAAGAAAAAAAAA	AT2G01570	GRAS	MP00611	Arabidopsis_thaliana	ChIP-seq	SRA:SRX647776	SRX647776
XS03G0261400	1469	1488	-	16.1667	1.09e-06	0.00381	GAGAAAGAGAGAGAGAGACA	AT2G01570	GRAS	MP00611	Arabidopsis_thaliana	ChIP-seq	SRA:SRX647776	SRX647776
XS03G0296800	1942	1961	+	15.5417	1.94e-06	0.00498	GTGAAAGAGAGAGAAACAGA	AT2G01570	GRAS	MP00611	Arabidopsis_thaliana	ChIP-seq	SRA:SRX647776	SRX647776
XS04G0003400	1225	1244	+	15.375	2.25e-06	0.00498	AGAAGAAAAACAAAAATAAA	AT2G01570	GRAS	MP00611	Arabidopsis_thaliana	ChIP-seq	SRA:SRX647776	SRX647776
XS03G0261400	603	622	+	15.3194	2.36e-06	0.00498	CAAAAAAAAAAAAAAAAAAA	AT2G01570	GRAS	MP00611	Arabidopsis_thaliana	ChIP-seq	SRA:SRX647776	SRX647776
XS02G0051900	878	897	-	15.3056	2.39e-06	0.00498	AAAAAAAAAAAAAAAAAAAA	AT2G01570	GRAS	MP00611	Arabidopsis_thaliana	ChIP-seq	SRA:SRX647776	SRX647776
XS03G0261400	604	623	+	15.3056	2.39e-06	0.00498	AAAAAAAAAAAAAAAAAAAA	AT2G01570	GRAS	MP00611	Arabidopsis_thaliana	ChIP-seq	SRA:SRX647776	SRX647776
XS03G0261400	1467	1486	-	15.2917	2.42e-06	0.00502	GAAAGAGAGAGAGAGACAGA	AT2G01570	GRAS	MP00611	Arabidopsis_thaliana	ChIP-seq	SRA:SRX647776	SRX647776
XS11G0022900	1970	1989	+	15.1806	2.66e-06	0.00532	GGAAGGAAAACAAAAAAAGA	AT2G01570	GRAS	MP00611	Arabidopsis_thaliana	ChIP-seq	SRA:SRX647776	SRX647776
XS02G0057700	789	808	+	15.1389	2.76e-06	0.00545	AACTAAAAGAAAAAAAAAAG	AT2G01570	GRAS	MP00611	Arabidopsis_thaliana	ChIP-seq	SRA:SRX647776	SRX647776
XS11G0022900	1978	1997	+	15.1111	2.83e-06	0.00552	AACAAAAAAAGAAGAGAAAA	AT2G01570	GRAS	MP00611	Arabidopsis_thaliana	ChIP-seq	SRA:SRX647776	SRX647776
XS10G0145900	1320	1339	+	15.0833	2.9e-06	0.00559	AAAAAAAAGAAAAAAATATA	AT2G01570	GRAS	MP00611	Arabidopsis_thaliana	ChIP-seq	SRA:SRX647776	SRX647776
XS11G0022900	1013	1032	+	15.0694	2.93e-06	0.00561	ATAAAAGAGAGAAAAATAAA	AT2G01570	GRAS	MP00611	Arabidopsis_thaliana	ChIP-seq	SRA:SRX647776	SRX647776
XS04G0240800	516	535	-	15.0556	2.97e-06	0.00561	TAGAGAGAGAGAGAGAGAGA	AT2G01570	GRAS	MP00611	Arabidopsis_thaliana	ChIP-seq	SRA:SRX647776	SRX647776
XS10G0145900	1307	1326	+	15.0556	2.97e-06	0.00561	AAGAAAAAAAAAGAAAAAAA	AT2G01570	GRAS	MP00611	Arabidopsis_thaliana	ChIP-seq	SRA:SRX647776	SRX647776
XS03G0296800	1944	1963	+	14.9722	3.19e-06	0.00584	GAAAGAGAGAGAAACAGAGA	AT2G01570	GRAS	MP00611	Arabidopsis_thaliana	ChIP-seq	SRA:SRX647776	SRX647776
XS02G0051900	626	645	-	14.8889	3.42e-06	0.006	GAGAGAGAGAGAGAGAGAGC	AT2G01570	GRAS	MP00611	Arabidopsis_thaliana	ChIP-seq	SRA:SRX647776	SRX647776
XS10G0145900	234	253	+	14.7917	3.72e-06	0.00619	AAGATAAAGAAAAAAACTAA	AT2G01570	GRAS	MP00611	Arabidopsis_thaliana	ChIP-seq	SRA:SRX647776	SRX647776
XS03G0296800	1948	1967	+	14.7917	3.72e-06	0.00619	GAGAGAGAAACAGAGAGAGG	AT2G01570	GRAS	MP00611	Arabidopsis_thaliana	ChIP-seq	SRA:SRX647776	SRX647776
XS03G0261400	1465	1484	-	14.625	4.27e-06	0.00672	AAGAGAGAGAGAGACAGAGA	AT2G01570	GRAS	MP00611	Arabidopsis_thaliana	ChIP-seq	SRA:SRX647776	SRX647776
XS02G0057100	1904	1923	+	14.5694	4.47e-06	0.00691	AAGAGGAAAAAAAAAAAAAA	AT2G01570	GRAS	MP00611	Arabidopsis_thaliana	ChIP-seq	SRA:SRX647776	SRX647776
XS05G0102500	1901	1920	+	14.5417	4.58e-06	0.00701	CCAAAAAAAAGAAAAAAAAA	AT2G01570	GRAS	MP00611	Arabidopsis_thaliana	ChIP-seq	SRA:SRX647776	SRX647776
XS10G0145900	1294	1313	+	14.5139	4.68e-06	0.0071	AAAAAAGAAAAAAAAGAAAA	AT2G01570	GRAS	MP00611	Arabidopsis_thaliana	ChIP-seq	SRA:SRX647776	SRX647776
XS10G0145900	1313	1332	+	14.5139	4.68e-06	0.0071	AAAAAAGAAAAAAAAGAAAA	AT2G01570	GRAS	MP00611	Arabidopsis_thaliana	ChIP-seq	SRA:SRX647776	SRX647776
XS02G0057100	1018	1037	-	14.4583	4.9e-06	0.0073	CAAAAAAGGACAGAAAATAT	AT2G01570	GRAS	MP00611	Arabidopsis_thaliana	ChIP-seq	SRA:SRX647776	SRX647776
XS11G0022900	412	431	-	14.3611	5.31e-06	0.00759	GGGTAAAAGAAAAAAAAAAT	AT2G01570	GRAS	MP00611	Arabidopsis_thaliana	ChIP-seq	SRA:SRX647776	SRX647776
XS10G0145900	1318	1337	+	14.2917	5.62e-06	0.00778	AGAAAAAAAAGAAAAAAATA	AT2G01570	GRAS	MP00611	Arabidopsis_thaliana	ChIP-seq	SRA:SRX647776	SRX647776
XS03G0261400	1471	1490	-	14.2778	5.68e-06	0.00783	TGGAGAAAGAGAGAGAGAGA	AT2G01570	GRAS	MP00611	Arabidopsis_thaliana	ChIP-seq	SRA:SRX647776	SRX647776
XS10G0145900	1304	1323	+	14.2083	6.01e-06	0.00801	AAAAAGAAAAAAAAAGAAAA	AT2G01570	GRAS	MP00611	Arabidopsis_thaliana	ChIP-seq	SRA:SRX647776	SRX647776
XS03G0296800	1952	1971	+	14.2083	6.01e-06	0.00801	GAGAAACAGAGAGAGGATGG	AT2G01570	GRAS	MP00611	Arabidopsis_thaliana	ChIP-seq	SRA:SRX647776	SRX647776
XS02G0057100	1898	1917	+	14.1528	6.29e-06	0.00815	ATGAAGAAGAGGAAAAAAAA	AT2G01570	GRAS	MP00611	Arabidopsis_thaliana	ChIP-seq	SRA:SRX647776	SRX647776
XS03G0261400	605	624	+	14.1389	6.36e-06	0.00815	AAAAAAAAAAAAAAAAAAAT	AT2G01570	GRAS	MP00611	Arabidopsis_thaliana	ChIP-seq	SRA:SRX647776	SRX647776
XS02G0051900	877	896	-	14.1389	6.36e-06	0.00815	AAAAAAAAAAAAAAAAAAAT	AT2G01570	GRAS	MP00611	Arabidopsis_thaliana	ChIP-seq	SRA:SRX647776	SRX647776
XS11G0022900	1099	1110	+	17.6667	1.51e-07	0.0342	AGATATTTTTTT	AT3G09600	MYB_related	MP00338	Arabidopsis_thaliana	DAP	PMID:27203113	AT3G09600
XS11G0022900	1099	1109	+	17.6061	5.49e-07	0.064	AGATATTTTTT	AT5G52660	MYB_related	MP00560	Arabidopsis_thaliana	DAP	PMID:27203113	AT5G52660
XS11G0022900	1099	1109	+	17.5606	5.49e-07	0.0611	AGATATTTTTT	AT4G01280	MYB_related	MP00423	Arabidopsis_thaliana	DAP	PMID:27203113	AT4G01280
XS11G0022900	1097	1111	-	16.6515	5.82e-07	0.0621	AAAAAAAATATCTTG	AT3G10113	MYB_related	MP00341	Arabidopsis_thaliana	DAP	PMID:27203113	AT3G10113
XS11G0022900	1097	1110	-	16.6667	5.91e-07	0.0503	AAAAAAATATCTTG	AT5G17300	MYB_related	MP00515	Arabidopsis_thaliana	DAP	PMID:27203113	AT5G17300
XS11G0022900	1097	1108	-	17.4394	9.2e-07	0.09	AAAAATATCTTG	AT1G18330	MYB_related	MP00146	Arabidopsis_thaliana	DAP	PMID:27203113	AT1G18330
XS10G0145900	600	621	-	16.0263	1.08e-06	0.0566	CAGATATCACAACAACAACAAC	AT1G18960	MYB_related	MP00148	Arabidopsis_thaliana	DAP	PMID:27203113	AT1G18960
XS04G0240800	1825	1839	-	15.8939	1.63e-06	0.15	ATTTAGGATAAAATT	AT5G61620	MYB_related	MP00573	Arabidopsis_thaliana	DAP	PMID:27203113	AT5G61620
XS02G0057100	1626	1644	-	16.3333	1.99e-06	0.109	AGAATCAAGCCCTAGTTTT	AT5G67580	MYB_related	MP00597	Arabidopsis_thaliana	DAP	PMID:27203113	AT5G67580
XS11G0022900	1099	1108	+	17.3485	2e-06	0.0949	AGATATTTTT	AT5G02840	MYB_related	MP00484	Arabidopsis_thaliana	DAP	PMID:27203113	AT5G02840
XS11G0022900	1099	1108	+	16.3182	2e-06	0.1	AGATATTTTT	AT1G01060	MYB_related	MP00119	Arabidopsis_thaliana	DAP	PMID:27203113	AT1G01060
XS05G0102500	728	737	+	14.1382	3.8e-06	0.872	AGTTAGGTAT	AT5G59780	MYB_related	MP00600	Arabidopsis_thaliana	PBM	PMID:24477691	MYB59
XS04G0240800	1825	1839	-	15.0263	4.11e-06	0.188	ATTTAGGATAAAATT	AT3G10580	MYB_related	MP00344	Arabidopsis_thaliana	DAP	PMID:27203113	AT3G10580
XS10G0145900	594	615	-	14.8421	4.72e-06	0.114	TCACAACAACAACAACCTCAAG	AT1G18960	MYB_related	MP00148	Arabidopsis_thaliana	DAP	PMID:27203113	AT1G18960
XS11G0022900	753	767	+	15.1667	4.94e-06	0.0984	AAAAAAAATATCCCA	AT3G10113	MYB_related	MP00341	Arabidopsis_thaliana	DAP	PMID:27203113	AT3G10113
XS10G0145900	597	618	-	14.5921	6.17e-06	0.13	ATATCACAACAACAACAACCTC	AT1G18960	MYB_related	MP00148	Arabidopsis_thaliana	DAP	PMID:27203113	AT1G18960
XS02G0057700	153	167	-	14.9545	6.21e-06	0.102	AAAAAAAATATCATC	AT3G10113	MYB_related	MP00341	Arabidopsis_thaliana	DAP	PMID:27203113	AT3G10113
XS02G0057100	1254	1268	+	14.0286	6.9e-06	0.253	CATCAACCCTAACTC	AT1G72740	MYB_related	MP00231	Arabidopsis_thaliana	DAP	PMID:27203113	AT1G72740
XS02G0057700	153	166	-	14.803	7.63e-06	0.111	AAAAAAATATCATC	AT5G17300	MYB_related	MP00515	Arabidopsis_thaliana	DAP	PMID:27203113	AT5G17300
XS04G0003400	1507	1525	-	14.6061	8.21e-06	0.183	CCTAAAAAACCCTAATAAT	AT5G67580	MYB_related	MP00597	Arabidopsis_thaliana	DAP	PMID:27203113	AT5G67580
XS11G0022900	1319	1333	+	14.2727	8.32e-06	0.316	AGTAGATAAGGTGGA	AT5G58900	MYB_related	MP00568	Arabidopsis_thaliana	DAP	PMID:27203113	AT5G58900
XS10G0145900	1156	1170	-	14.6515	8.42e-06	0.111	AATATAAATATCATA	AT3G10113	MYB_related	MP00341	Arabidopsis_thaliana	DAP	PMID:27203113	AT3G10113
XS02G0057700	155	166	+	14.5606	8.94e-06	0.124	TGATATTTTTTT	AT3G09600	MYB_related	MP00338	Arabidopsis_thaliana	DAP	PMID:27203113	AT3G09600
XS11G0022900	1317	1331	+	14.1316	9.09e-06	0.188	AAAGTAGATAAGGTG	AT3G10580	MYB_related	MP00344	Arabidopsis_thaliana	DAP	PMID:27203113	AT3G10580
XS04G0240800	1825	1839	+	14.0303	9.91e-06	0.269	AATTTTATCCTAAAT	AT5G56840	MYB_related	MP00565	Arabidopsis_thaliana	DAP	PMID:27203113	AT5G56840
XS11G0022900	755	765	-	14.3333	1.06e-05	0.143	GGATATTTTTT	AT5G52660	MYB_related	MP00560	Arabidopsis_thaliana	DAP	PMID:27203113	AT5G52660
XS11G0022900	754	765	-	14.2576	1.11e-05	0.134	GGATATTTTTTT	AT3G09600	MYB_related	MP00338	Arabidopsis_thaliana	DAP	PMID:27203113	AT3G09600
XS11G0022900	756	767	+	14.2121	1.18e-05	0.146	AAAAATATCCCA	AT1G18330	MYB_related	MP00146	Arabidopsis_thaliana	DAP	PMID:27203113	AT1G18330
XS10G0145900	1972	1985	-	14.2273	1.2e-05	0.12	ACAATAATATCTTC	AT5G17300	MYB_related	MP00515	Arabidopsis_thaliana	DAP	PMID:27203113	AT5G17300
XS02G0057100	1357	1364	-	14.2653	1.21e-05	1	CTAGGGCA	AT1G15720	MYB_related	MP00052	Arabidopsis_thaliana	PBM	PMID:25215497	M1316_1.02
XS11G0022900	755	765	-	13.9545	1.22e-05	0.101	GGATATTTTTT	AT4G01280	MYB_related	MP00423	Arabidopsis_thaliana	DAP	PMID:27203113	AT4G01280
XS10G0145900	1156	1169	-	14.0455	1.36e-05	0.123	ATATAAATATCATA	AT5G17300	MYB_related	MP00515	Arabidopsis_thaliana	DAP	PMID:27203113	AT5G17300
XS11G0022900	754	767	+	13.9848	1.43e-05	0.124	AAAAAAATATCCCA	AT5G17300	MYB_related	MP00515	Arabidopsis_thaliana	DAP	PMID:27203113	AT5G17300
XS10G0145900	1974	1985	+	13.803	1.5e-05	0.137	AGATATTATTGT	AT3G09600	MYB_related	MP00338	Arabidopsis_thaliana	DAP	PMID:27203113	AT3G09600
XS04G0003400	1508	1522	-	11.9286	1.65e-05	0.337	AAAAAACCCTAATAA	AT1G72740	MYB_related	MP00231	Arabidopsis_thaliana	DAP	PMID:27203113	AT1G72740
XS02G0057700	155	165	+	13.4394	1.73e-05	0.144	TGATATTTTTT	AT5G52660	MYB_related	MP00560	Arabidopsis_thaliana	DAP	PMID:27203113	AT5G52660
XS11G0022900	1317	1331	-	13.1515	1.77e-05	0.272	CACCTTATCTACTTT	AT5G56840	MYB_related	MP00565	Arabidopsis_thaliana	DAP	PMID:27203113	AT5G56840
XS10G0145900	1974	1984	+	13.4091	1.77e-05	0.144	AGATATTATTG	AT5G52660	MYB_related	MP00560	Arabidopsis_thaliana	DAP	PMID:27203113	AT5G52660
XS11G0022900	756	765	-	13.1818	1.78e-05	0.134	GGATATTTTT	AT5G02840	MYB_related	MP00484	Arabidopsis_thaliana	DAP	PMID:27203113	AT5G02840
XS04G0003400	1971	1989	+	13.2424	1.89e-05	0.256	TGAATACAACCCTAATTTT	AT5G67580	MYB_related	MP00597	Arabidopsis_thaliana	DAP	PMID:27203113	AT5G67580
XS02G0057700	153	164	-	12.7879	1.93e-05	0.158	AAAAATATCATC	AT1G18330	MYB_related	MP00146	Arabidopsis_thaliana	DAP	PMID:27203113	AT1G18330
XS02G0057600	359	373	-	13.2121	1.96e-05	0.32	ATGGGATAAGAAATT	AT5G58900	MYB_related	MP00568	Arabidopsis_thaliana	DAP	PMID:27203113	AT5G58900
XS10G0145900	1498	1508	-	13.2576	1.99e-05	0.12	AGATTTTTTTC	AT4G01280	MYB_related	MP00423	Arabidopsis_thaliana	DAP	PMID:27203113	AT4G01280
XS02G0057700	420	433	-	13.4091	2.07e-05	0.135	TAATTAATATCTTA	AT5G17300	MYB_related	MP00515	Arabidopsis_thaliana	DAP	PMID:27203113	AT5G17300
XS04G0003400	1566	1577	+	13.2727	2.07e-05	0.146	AGATATTATATT	AT3G09600	MYB_related	MP00338	Arabidopsis_thaliana	DAP	PMID:27203113	AT3G09600
XS11G0022900	1318	1331	+	13	2.08e-05	0.396	AAGTAGATAAGGTG	AT1G19000	MYB_related	MP00149	Arabidopsis_thaliana	DAP	PMID:27203113	AT1G19000
XS10G0145900	1156	1167	-	12.5606	2.11e-05	0.163	ATAAATATCATA	AT1G18330	MYB_related	MP00146	Arabidopsis_thaliana	DAP	PMID:27203113	AT1G18330
XS10G0145900	1974	1983	+	12.2727	2.12e-05	0.134	AGATATTATT	AT5G02840	MYB_related	MP00484	Arabidopsis_thaliana	DAP	PMID:27203113	AT5G02840
XS02G0057700	155	164	+	13.1061	2.12e-05	0.175	TGATATTTTT	AT1G01060	MYB_related	MP00119	Arabidopsis_thaliana	DAP	PMID:27203113	AT1G01060
XS02G0057700	155	165	+	13.197	2.13e-05	0.12	TGATATTTTTT	AT4G01280	MYB_related	MP00423	Arabidopsis_thaliana	DAP	PMID:27203113	AT4G01280
XS11G0022900	1403	1417	-	13.4848	2.14e-05	0.143	AAAATAAATATCCAT	AT3G10113	MYB_related	MP00341	Arabidopsis_thaliana	DAP	PMID:27203113	AT3G10113
XS02G0057100	1003	1024	-	13.1711	2.19e-05	0.228	AAAATATTACAACAACTTTCTC	AT1G18960	MYB_related	MP00148	Arabidopsis_thaliana	DAP	PMID:27203113	AT1G18960
XS05G0102500	1893	1907	-	12.8939	2.24e-05	0.205	TTTTTGGATAGATTT	AT5G61620	MYB_related	MP00573	Arabidopsis_thaliana	DAP	PMID:27203113	AT5G61620
XS04G0003400	1517	1535	-	12.8333	2.33e-05	0.276	AGAATTAAAACCTAAAAAA	AT5G67580	MYB_related	MP00597	Arabidopsis_thaliana	DAP	PMID:27203113	AT5G67580
XS10G0145900	1972	1986	-	13.303	2.41e-05	0.148	CACAATAATATCTTC	AT3G10113	MYB_related	MP00341	Arabidopsis_thaliana	DAP	PMID:27203113	AT3G10113
XS02G0051900	1812	1826	+	12.7763	2.45e-05	0.188	AATGAATATAAGGAT	AT3G10580	MYB_related	MP00344	Arabidopsis_thaliana	DAP	PMID:27203113	AT3G10580
XS10G0145900	1974	1983	+	12.9091	2.45e-05	0.183	AGATATTATT	AT1G01060	MYB_related	MP00119	Arabidopsis_thaliana	DAP	PMID:27203113	AT1G01060
XS10G0145900	1974	1984	+	12.5606	2.61e-05	0.123	AGATATTATTG	AT4G01280	MYB_related	MP00423	Arabidopsis_thaliana	DAP	PMID:27203113	AT4G01280
XS11G0022900	1099	1106	-	14.7213	2.65e-05	0.235	AAATATCT	AT2G46830	MYB_related	MP00103	Arabidopsis_thaliana	PBM	PMID:26531826	MA0972.1
XS02G0057700	420	434	-	13.0909	2.76e-05	0.155	TTAATTAATATCTTA	AT3G10113	MYB_related	MP00341	Arabidopsis_thaliana	DAP	PMID:27203113	AT3G10113
XS11G0022900	1405	1415	+	12.4242	2.81e-05	0.144	GGATATTTATT	AT5G52660	MYB_related	MP00560	Arabidopsis_thaliana	DAP	PMID:27203113	AT5G52660
XS10G0145900	1009	1027	+	12.4242	2.84e-05	0.3	ACAAAAAAAACCTAAAATC	AT5G67580	MYB_related	MP00597	Arabidopsis_thaliana	DAP	PMID:27203113	AT5G67580
XS11G0022900	398	412	-	12.5303	2.87e-05	0.215	TTAAAGGATAAAAAA	AT5G61620	MYB_related	MP00573	Arabidopsis_thaliana	DAP	PMID:27203113	AT5G61620
XS04G0003400	342	352	-	12.3788	2.88e-05	0.125	AGATTTTTTAT	AT4G01280	MYB_related	MP00423	Arabidopsis_thaliana	DAP	PMID:27203113	AT4G01280
XS04G0003400	1564	1577	-	12.8333	2.98e-05	0.147	AATATAATATCTTT	AT5G17300	MYB_related	MP00515	Arabidopsis_thaliana	DAP	PMID:27203113	AT5G17300
XS03G0296800	1751	1760	-	12.3333	3.03e-05	0.888	AGTTAGGTTT	AT5G59780	MYB_related	MP00600	Arabidopsis_thaliana	PBM	PMID:24477691	MYB59
XS10G0145900	1499	1508	-	11.8333	3.05e-05	0.134	AGATTTTTTT	AT5G02840	MYB_related	MP00484	Arabidopsis_thaliana	DAP	PMID:27203113	AT5G02840
XS11G0022900	1319	1333	-	12.5303	3.07e-05	0.318	TCCACCTTATCTACT	AT5G47390	MYB_related	MP00551	Arabidopsis_thaliana	DAP	PMID:27203113	AT5G47390
XS11G0022900	1403	1416	-	12.7424	3.13e-05	0.15	AAATAAATATCCAT	AT5G17300	MYB_related	MP00515	Arabidopsis_thaliana	DAP	PMID:27203113	AT5G17300
XS05G0102500	1729	1743	+	12.8788	3.13e-05	0.162	ATCATAAATATCATT	AT3G10113	MYB_related	MP00341	Arabidopsis_thaliana	DAP	PMID:27203113	AT3G10113
XS04G0003400	1802	1812	-	12.1818	3.21e-05	0.129	AGATTTTTATT	AT4G01280	MYB_related	MP00423	Arabidopsis_thaliana	DAP	PMID:27203113	AT4G01280
XS04G0003400	1822	1832	-	12.1818	3.21e-05	0.129	AGATTTTTATT	AT4G01280	MYB_related	MP00423	Arabidopsis_thaliana	DAP	PMID:27203113	AT4G01280
XS11G0022900	1317	1331	+	12.3636	3.21e-05	0.219	AAAGTAGATAAGGTG	AT5G61620	MYB_related	MP00573	Arabidopsis_thaliana	DAP	PMID:27203113	AT5G61620
XS11G0022900	756	765	-	12.5606	3.21e-05	0.2	GGATATTTTT	AT1G01060	MYB_related	MP00119	Arabidopsis_thaliana	DAP	PMID:27203113	AT1G01060
XS11G0022900	1403	1414	-	11.3333	3.22e-05	0.172	ATAAATATCCAT	AT1G18330	MYB_related	MP00146	Arabidopsis_thaliana	DAP	PMID:27203113	AT1G18330
XS02G0057700	155	164	+	11.7727	3.25e-05	0.134	TGATATTTTT	AT5G02840	MYB_related	MP00484	Arabidopsis_thaliana	DAP	PMID:27203113	AT5G02840
XS02G0057100	1251	1269	+	12.1212	3.26e-05	0.32	AGACATCAACCCTAACTCA	AT5G67580	MYB_related	MP00597	Arabidopsis_thaliana	DAP	PMID:27203113	AT5G67580
XS05G0102500	1730	1743	+	12.6515	3.28e-05	0.152	TCATAAATATCATT	AT5G17300	MYB_related	MP00515	Arabidopsis_thaliana	DAP	PMID:27203113	AT5G17300
XS04G0003400	1566	1576	+	12.0606	3.35e-05	0.155	AGATATTATAT	AT5G52660	MYB_related	MP00560	Arabidopsis_thaliana	DAP	PMID:27203113	AT5G52660
XS11G0022900	1405	1416	+	12.4697	3.37e-05	0.166	GGATATTTATTT	AT3G09600	MYB_related	MP00338	Arabidopsis_thaliana	DAP	PMID:27203113	AT3G09600
XS11G0022900	1405	1415	+	12.0909	3.4e-05	0.132	GGATATTTATT	AT4G01280	MYB_related	MP00423	Arabidopsis_thaliana	DAP	PMID:27203113	AT4G01280
XS10G0145900	1158	1169	+	12.3636	3.56e-05	0.17	TGATATTTATAT	AT3G09600	MYB_related	MP00338	Arabidopsis_thaliana	DAP	PMID:27203113	AT3G09600
XS03G0261400	1226	1244	+	11.8939	3.6e-05	0.334	CTAAACAAAACCTAAAATT	AT5G67580	MYB_related	MP00597	Arabidopsis_thaliana	DAP	PMID:27203113	AT5G67580
XS02G0057700	422	432	+	11.9091	3.61e-05	0.158	AGATATTAATT	AT5G52660	MYB_related	MP00560	Arabidopsis_thaliana	DAP	PMID:27203113	AT5G52660
XS04G0003400	1974	1988	+	9.67143	3.69e-05	0.453	ATACAACCCTAATTT	AT1G72740	MYB_related	MP00231	Arabidopsis_thaliana	DAP	PMID:27203113	AT1G72740
XS02G0057100	1793	1807	-	11.8939	3.77e-05	0.288	GGTCTTATCTATTAA	AT5G56840	MYB_related	MP00565	Arabidopsis_thaliana	DAP	PMID:27203113	AT5G56840
XS05G0102500	1732	1743	+	10.8333	3.79e-05	0.182	ATAAATATCATT	AT1G18330	MYB_related	MP00146	Arabidopsis_thaliana	DAP	PMID:27203113	AT1G18330
XS02G0057100	282	292	-	11.8939	3.82e-05	0.14	AGATTTTTTGA	AT4G01280	MYB_related	MP00423	Arabidopsis_thaliana	DAP	PMID:27203113	AT4G01280
XS02G0057100	1630	1637	+	12.8673	3.88e-05	1	CTAGGGCT	AT1G15720	MYB_related	MP00052	Arabidopsis_thaliana	PBM	PMID:25215497	M1316_1.02
XS04G0003400	1564	1578	-	12.4848	3.89e-05	0.175	TAATATAATATCTTT	AT3G10113	MYB_related	MP00341	Arabidopsis_thaliana	DAP	PMID:27203113	AT3G10113
XS03G0261400	1852	1866	-	12	3.99e-05	0.188	AATAATGATAATAAT	AT3G10580	MYB_related	MP00344	Arabidopsis_thaliana	DAP	PMID:27203113	AT3G10580
XS04G0240800	1024	1038	+	9.34286	4.11e-05	0.476	TTGAAAACCTAATTA	AT1G72740	MYB_related	MP00231	Arabidopsis_thaliana	DAP	PMID:27203113	AT1G72740
XS04G0003400	1566	1575	+	10.7576	4.21e-05	0.134	AGATATTATA	AT5G02840	MYB_related	MP00484	Arabidopsis_thaliana	DAP	PMID:27203113	AT5G02840
XS04G0240800	1810	1819	+	12.0488	4.26e-05	0.888	AGGTAGGTAC	AT5G59780	MYB_related	MP00600	Arabidopsis_thaliana	PBM	PMID:24477691	MYB59
XS03G0296800	1362	1372	-	11.6515	4.29e-05	0.144	AGATTTTTATA	AT4G01280	MYB_related	MP00423	Arabidopsis_thaliana	DAP	PMID:27203113	AT4G01280
XS04G0003400	1917	1927	-	11.6515	4.29e-05	0.144	AGATTTTTATA	AT4G01280	MYB_related	MP00423	Arabidopsis_thaliana	DAP	PMID:27203113	AT4G01280
XS04G0003400	519	529	+	11.6515	4.29e-05	0.144	AGATTTTTATA	AT4G01280	MYB_related	MP00423	Arabidopsis_thaliana	DAP	PMID:27203113	AT4G01280
XS05G0102500	1732	1741	-	12.0909	4.41e-05	0.205	TGATATTTAT	AT1G01060	MYB_related	MP00119	Arabidopsis_thaliana	DAP	PMID:27203113	AT1G01060
XS10G0145900	1158	1167	+	12.0909	4.41e-05	0.205	TGATATTTAT	AT1G01060	MYB_related	MP00119	Arabidopsis_thaliana	DAP	PMID:27203113	AT1G01060
XS10G0145900	1579	1593	+	12.197	4.49e-05	0.184	AACTCAAATATCCAA	AT3G10113	MYB_related	MP00341	Arabidopsis_thaliana	DAP	PMID:27203113	AT3G10113
XS11G0022900	1405	1414	+	10.6818	4.54e-05	0.134	GGATATTTAT	AT5G02840	MYB_related	MP00484	Arabidopsis_thaliana	DAP	PMID:27203113	AT5G02840
XS02G0057700	422	433	+	11.803	4.55e-05	0.185	AGATATTAATTA	AT3G09600	MYB_related	MP00338	Arabidopsis_thaliana	DAP	PMID:27203113	AT3G09600
XS03G0261400	1264	1282	+	11.3182	4.56e-05	0.366	CAAATGTAGACCTAAAAAT	AT5G67580	MYB_related	MP00597	Arabidopsis_thaliana	DAP	PMID:27203113	AT5G67580
XS10G0145900	1498	1508	-	11.3939	4.57e-05	0.164	AGATTTTTTTC	AT5G52660	MYB_related	MP00560	Arabidopsis_thaliana	DAP	PMID:27203113	AT5G52660
XS04G0003400	1566	1575	+	11.9091	4.61e-05	0.207	AGATATTATA	AT1G01060	MYB_related	MP00119	Arabidopsis_thaliana	DAP	PMID:27203113	AT1G01060
XS05G0102500	1730	1741	-	11.6818	4.63e-05	0.185	TGATATTTATGA	AT3G09600	MYB_related	MP00338	Arabidopsis_thaliana	DAP	PMID:27203113	AT3G09600
XS11G0022900	396	410	+	11.8485	4.67e-05	0.338	TATTTTTTATCCTTT	AT5G47390	MYB_related	MP00551	Arabidopsis_thaliana	DAP	PMID:27203113	AT5G47390
XS11G0022900	398	412	+	11.5	4.7e-05	0.291	TTTTTTATCCTTTAA	AT5G56840	MYB_related	MP00565	Arabidopsis_thaliana	DAP	PMID:27203113	AT5G56840
XS04G0240800	415	422	-	11.7377	4.83e-05	0.29	AAATATCC	AT2G46830	MYB_related	MP00103	Arabidopsis_thaliana	PBM	PMID:26531826	MA0972.1
XS11G0022900	758	765	+	11.7377	4.83e-05	0.29	AAATATCC	AT2G46830	MYB_related	MP00103	Arabidopsis_thaliana	PBM	PMID:26531826	MA0972.1
XS11G0022900	1405	1412	-	11.7377	4.83e-05	0.29	AAATATCC	AT2G46830	MYB_related	MP00103	Arabidopsis_thaliana	PBM	PMID:26531826	MA0972.1
XS10G0145900	1584	1591	+	11.7377	4.83e-05	0.29	AAATATCC	AT2G46830	MYB_related	MP00103	Arabidopsis_thaliana	PBM	PMID:26531826	MA0972.1
XS04G0240800	1823	1837	+	11.7879	4.83e-05	0.341	GTAATTTTATCCTAA	AT5G47390	MYB_related	MP00551	Arabidopsis_thaliana	DAP	PMID:27203113	AT5G47390
XS10G0145900	713	727	+	8.82857	4.86e-05	0.512	ACCAAACCCTGGCCC	AT1G72740	MYB_related	MP00231	Arabidopsis_thaliana	DAP	PMID:27203113	AT1G72740
XS04G0003400	1566	1576	+	11.4848	4.88e-05	0.149	AGATATTATAT	AT4G01280	MYB_related	MP00423	Arabidopsis_thaliana	DAP	PMID:27203113	AT4G01280
XS10G0145900	128	139	+	11.4394	4.91e-05	0.189	AGATATTAATAG	AT3G09600	MYB_related	MP00338	Arabidopsis_thaliana	DAP	PMID:27203113	AT3G09600
XS02G0057100	1350	1368	+	11.1212	4.91e-05	0.377	ATTTATATGCCCTAGGTCA	AT5G67580	MYB_related	MP00597	Arabidopsis_thaliana	DAP	PMID:27203113	AT5G67580
XS10G0145900	128	137	+	11.8939	4.94e-05	0.209	AGATATTAAT	AT1G01060	MYB_related	MP00119	Arabidopsis_thaliana	DAP	PMID:27203113	AT1G01060
XS02G0057700	422	431	+	11.8939	4.94e-05	0.209	AGATATTAAT	AT1G01060	MYB_related	MP00119	Arabidopsis_thaliana	DAP	PMID:27203113	AT1G01060
XS02G0057100	1627	1641	-	8.77143	4.94e-05	0.514	ATCAAGCCCTAGTTT	AT1G72740	MYB_related	MP00231	Arabidopsis_thaliana	DAP	PMID:27203113	AT1G72740
XS02G0057100	283	292	-	10.5758	5.03e-05	0.134	AGATTTTTTG	AT5G02840	MYB_related	MP00484	Arabidopsis_thaliana	DAP	PMID:27203113	AT5G02840
XS10G0145900	1972	1983	-	9.74242	5.04e-05	0.199	AATAATATCTTC	AT1G18330	MYB_related	MP00146	Arabidopsis_thaliana	DAP	PMID:27203113	AT1G18330
XS10G0145900	128	138	+	11.1364	5.07e-05	0.168	AGATATTAATA	AT5G52660	MYB_related	MP00560	Arabidopsis_thaliana	DAP	PMID:27203113	AT5G52660
XS04G0240800	610	617	+	12.6939	5.08e-05	1	GTAGGGCA	AT1G15720	MYB_related	MP00052	Arabidopsis_thaliana	PBM	PMID:25215497	M1316_1.02
XS05G0102500	1731	1741	-	11.1212	5.11e-05	0.169	TGATATTTATG	AT5G52660	MYB_related	MP00560	Arabidopsis_thaliana	DAP	PMID:27203113	AT5G52660
XS03G0296800	187	201	-	11.5909	5.17e-05	0.239	AAAATAGATAAAATG	AT5G61620	MYB_related	MP00573	Arabidopsis_thaliana	DAP	PMID:27203113	AT5G61620
XS03G0261400	239	248	+	10.5303	5.2e-05	0.134	AGATAGTTTT	AT5G02840	MYB_related	MP00484	Arabidopsis_thaliana	DAP	PMID:27203113	AT5G02840
XS02G0057700	420	431	-	9.51515	5.24e-05	0.2	ATTAATATCTTA	AT1G18330	MYB_related	MP00146	Arabidopsis_thaliana	DAP	PMID:27203113	AT1G18330
XS02G0057700	422	432	+	11.2879	5.3e-05	0.152	AGATATTAATT	AT4G01280	MYB_related	MP00423	Arabidopsis_thaliana	DAP	PMID:27203113	AT4G01280
XS10G0145900	126	139	-	11.6212	5.43e-05	0.179	CTATTAATATCTAG	AT5G17300	MYB_related	MP00515	Arabidopsis_thaliana	DAP	PMID:27203113	AT5G17300
XS11G0022900	1405	1414	+	11.5455	5.43e-05	0.214	GGATATTTAT	AT1G01060	MYB_related	MP00119	Arabidopsis_thaliana	DAP	PMID:27203113	AT1G01060
XS04G0003400	343	352	-	10.3182	5.56e-05	0.134	AGATTTTTTA	AT5G02840	MYB_related	MP00484	Arabidopsis_thaliana	DAP	PMID:27203113	AT5G02840
XS03G0296800	601	610	-	11.5772	5.58e-05	0.888	ATTTAGGTAA	AT5G59780	MYB_related	MP00600	Arabidopsis_thaliana	PBM	PMID:24477691	MYB59
XS02G0057700	1181	1190	+	11.5772	5.58e-05	0.888	ATTTAGGTAA	AT5G59780	MYB_related	MP00600	Arabidopsis_thaliana	PBM	PMID:24477691	MYB59
XS04G0240800	1823	1837	-	11.6212	5.6e-05	0.32	TTAGGATAAAATTAC	AT5G58900	MYB_related	MP00568	Arabidopsis_thaliana	DAP	PMID:27203113	AT5G58900
XS10G0145900	1158	1168	+	10.7576	5.61e-05	0.172	TGATATTTATA	AT5G52660	MYB_related	MP00560	Arabidopsis_thaliana	DAP	PMID:27203113	AT5G52660
XS04G0003400	342	352	-	10.6818	5.75e-05	0.172	AGATTTTTTAT	AT5G52660	MYB_related	MP00560	Arabidopsis_thaliana	DAP	PMID:27203113	AT5G52660
XS04G0240800	1021	1039	+	10.6364	5.87e-05	0.407	TCCTTGAAAACCTAATTAG	AT5G67580	MYB_related	MP00597	Arabidopsis_thaliana	DAP	PMID:27203113	AT5G67580
XS10G0145900	1158	1168	+	10.803	5.88e-05	0.154	TGATATTTATA	AT4G01280	MYB_related	MP00423	Arabidopsis_thaliana	DAP	PMID:27203113	AT4G01280
XS10G0145900	128	137	+	9.77273	5.96e-05	0.134	AGATATTAAT	AT5G02840	MYB_related	MP00484	Arabidopsis_thaliana	DAP	PMID:27203113	AT5G02840
XS02G0057700	422	431	+	9.77273	5.96e-05	0.134	AGATATTAAT	AT5G02840	MYB_related	MP00484	Arabidopsis_thaliana	DAP	PMID:27203113	AT5G02840
XS02G0057600	361	375	-	11.3026	5.97e-05	0.188	TAATGGGATAAGAAA	AT3G10580	MYB_related	MP00344	Arabidopsis_thaliana	DAP	PMID:27203113	AT3G10580
XS11G0022900	1077	1091	-	11.3026	5.97e-05	0.188	TTTAGGGATAAAATT	AT3G10580	MYB_related	MP00344	Arabidopsis_thaliana	DAP	PMID:27203113	AT3G10580
XS04G0240800	1040	1054	-	11.2895	6.02e-05	0.188	AATATAGAAAAGAAT	AT3G10580	MYB_related	MP00344	Arabidopsis_thaliana	DAP	PMID:27203113	AT3G10580
XS10G0145900	128	138	+	10.7576	6.02e-05	0.154	AGATATTAATA	AT4G01280	MYB_related	MP00423	Arabidopsis_thaliana	DAP	PMID:27203113	AT4G01280
XS04G0240800	1432	1443	+	8.80303	6.03e-05	0.213	ATAAATATCGTG	AT1G18330	MYB_related	MP00146	Arabidopsis_thaliana	DAP	PMID:27203113	AT1G18330
XS04G0003400	1802	1812	-	10.5303	6.08e-05	0.172	AGATTTTTATT	AT5G52660	MYB_related	MP00560	Arabidopsis_thaliana	DAP	PMID:27203113	AT5G52660
XS04G0003400	1822	1832	-	10.5303	6.08e-05	0.172	AGATTTTTATT	AT5G52660	MYB_related	MP00560	Arabidopsis_thaliana	DAP	PMID:27203113	AT5G52660
XS10G0145900	1012	1026	+	8.08571	6.08e-05	0.555	AAAAAAACCTAAAAT	AT1G72740	MYB_related	MP00231	Arabidopsis_thaliana	DAP	PMID:27203113	AT1G72740
XS04G0240800	1028	1037	-	11.439	6.13e-05	0.888	AATTAGGTTT	AT5G59780	MYB_related	MP00600	Arabidopsis_thaliana	PBM	PMID:24477691	MYB59
XS05G0102500	1731	1741	-	10.7424	6.14e-05	0.154	TGATATTTATG	AT4G01280	MYB_related	MP00423	Arabidopsis_thaliana	DAP	PMID:27203113	AT4G01280
XS05G0102500	360	369	-	9.54545	6.2e-05	0.134	ATATATTTTT	AT5G02840	MYB_related	MP00484	Arabidopsis_thaliana	DAP	PMID:27203113	AT5G02840
XS11G0022900	527	536	-	9.54545	6.2e-05	0.134	ATATATTTTT	AT5G02840	MYB_related	MP00484	Arabidopsis_thaliana	DAP	PMID:27203113	AT5G02840
XS11G0022900	625	634	-	9.54545	6.2e-05	0.134	ATATATTTTT	AT5G02840	MYB_related	MP00484	Arabidopsis_thaliana	DAP	PMID:27203113	AT5G02840
XS02G0057600	841	850	-	9.54545	6.2e-05	0.134	ATATATTTTT	AT5G02840	MYB_related	MP00484	Arabidopsis_thaliana	DAP	PMID:27203113	AT5G02840
XS11G0022900	1049	1058	-	9.54545	6.2e-05	0.134	ATATATTTTT	AT5G02840	MYB_related	MP00484	Arabidopsis_thaliana	DAP	PMID:27203113	AT5G02840
XS10G0145900	1331	1340	-	9.54545	6.2e-05	0.134	ATATATTTTT	AT5G02840	MYB_related	MP00484	Arabidopsis_thaliana	DAP	PMID:27203113	AT5G02840
XS04G0240800	1583	1592	-	9.54545	6.2e-05	0.134	ATATATTTTT	AT5G02840	MYB_related	MP00484	Arabidopsis_thaliana	DAP	PMID:27203113	AT5G02840
XS04G0240800	541	550	+	9.54545	6.2e-05	0.134	ATATATTTTT	AT5G02840	MYB_related	MP00484	Arabidopsis_thaliana	DAP	PMID:27203113	AT5G02840
XS11G0022900	633	642	+	9.54545	6.2e-05	0.134	ATATATTTTT	AT5G02840	MYB_related	MP00484	Arabidopsis_thaliana	DAP	PMID:27203113	AT5G02840
XS03G0296800	808	817	+	9.54545	6.2e-05	0.134	ATATATTTTT	AT5G02840	MYB_related	MP00484	Arabidopsis_thaliana	DAP	PMID:27203113	AT5G02840
XS03G0261400	1229	1243	+	8.01429	6.21e-05	0.56	AACAAAACCTAAAAT	AT1G72740	MYB_related	MP00231	Arabidopsis_thaliana	DAP	PMID:27203113	AT1G72740
XS02G0057600	1127	1137	+	10.6515	6.28e-05	0.154	AGATTTTTCTT	AT4G01280	MYB_related	MP00423	Arabidopsis_thaliana	DAP	PMID:27203113	AT4G01280
XS10G0145900	203	214	-	8.56061	6.34e-05	0.217	GAAAATATCGAT	AT1G18330	MYB_related	MP00146	Arabidopsis_thaliana	DAP	PMID:27203113	AT1G18330
XS11G0022900	400	410	-	11.5152	6.34e-05	0.583	AAAGGATAAAA	AT1G74840	MYB_related	MP00236	Arabidopsis_thaliana	DAP	PMID:27203113	AT1G74840
XS10G0145900	553	562	-	11.3902	6.35e-05	0.888	TATTAGGTCA	AT5G59780	MYB_related	MP00600	Arabidopsis_thaliana	PBM	PMID:24477691	MYB59
XS04G0240800	1825	1838	-	10.8485	6.45e-05	0.454	TTTAGGATAAAATT	AT1G19000	MYB_related	MP00149	Arabidopsis_thaliana	DAP	PMID:27203113	AT1G19000
XS02G0057100	1795	1805	+	11.4848	6.48e-05	0.583	AATAGATAAGA	AT1G74840	MYB_related	MP00236	Arabidopsis_thaliana	DAP	PMID:27203113	AT1G74840
XS02G0057100	282	292	-	10.2273	6.5e-05	0.178	AGATTTTTTGA	AT5G52660	MYB_related	MP00560	Arabidopsis_thaliana	DAP	PMID:27203113	AT5G52660
XS11G0022900	1772	1786	-	11.3636	6.51e-05	0.32	AAGAGATAAGGAACA	AT5G58900	MYB_related	MP00568	Arabidopsis_thaliana	DAP	PMID:27203113	AT5G58900
XS02G0051900	1070	1080	+	10.3939	6.68e-05	0.154	AGATTTTTACA	AT4G01280	MYB_related	MP00423	Arabidopsis_thaliana	DAP	PMID:27203113	AT4G01280
XS11G0022900	10	24	-	11.2121	6.77e-05	0.215	TCAATTAATATCAAA	AT3G10113	MYB_related	MP00341	Arabidopsis_thaliana	DAP	PMID:27203113	AT3G10113
XS11G0022900	93	107	-	11.2121	6.77e-05	0.215	TCAATTAATATCAAA	AT3G10113	MYB_related	MP00341	Arabidopsis_thaliana	DAP	PMID:27203113	AT3G10113
XS03G0296800	1363	1372	-	9.33333	6.81e-05	0.139	AGATTTTTAT	AT5G02840	MYB_related	MP00484	Arabidopsis_thaliana	DAP	PMID:27203113	AT5G02840
XS04G0003400	1803	1812	-	9.33333	6.81e-05	0.139	AGATTTTTAT	AT5G02840	MYB_related	MP00484	Arabidopsis_thaliana	DAP	PMID:27203113	AT5G02840
XS04G0003400	1823	1832	-	9.33333	6.81e-05	0.139	AGATTTTTAT	AT5G02840	MYB_related	MP00484	Arabidopsis_thaliana	DAP	PMID:27203113	AT5G02840
XS04G0003400	1918	1927	-	9.33333	6.81e-05	0.139	AGATTTTTAT	AT5G02840	MYB_related	MP00484	Arabidopsis_thaliana	DAP	PMID:27203113	AT5G02840
XS04G0003400	519	528	+	9.33333	6.81e-05	0.139	AGATTTTTAT	AT5G02840	MYB_related	MP00484	Arabidopsis_thaliana	DAP	PMID:27203113	AT5G02840
XS03G0261400	1271	1279	-	11.8286	6.88e-05	1	TTTAGGTCT	AT1G49950	MYB_related	MP00607	Arabidopsis_thaliana	ChIP-seq	SRA:SRX1044956	SRX1044956
XS03G0296800	187	201	+	10.7576	6.91e-05	0.3	CATTTTATCTATTTT	AT5G56840	MYB_related	MP00565	Arabidopsis_thaliana	DAP	PMID:27203113	AT5G56840
XS02G0051900	1055	1065	-	10.1364	6.98e-05	0.154	AGATTTTTACC	AT4G01280	MYB_related	MP00423	Arabidopsis_thaliana	DAP	PMID:27203113	AT4G01280
XS10G0145900	126	140	-	11.0909	7.07e-05	0.22	ACTATTAATATCTAG	AT3G10113	MYB_related	MP00341	Arabidopsis_thaliana	DAP	PMID:27203113	AT3G10113
XS11G0022900	10	23	-	10.8939	7.21e-05	0.198	CAATTAATATCAAA	AT5G17300	MYB_related	MP00515	Arabidopsis_thaliana	DAP	PMID:27203113	AT5G17300
XS11G0022900	93	106	-	10.8939	7.21e-05	0.198	CAATTAATATCAAA	AT5G17300	MYB_related	MP00515	Arabidopsis_thaliana	DAP	PMID:27203113	AT5G17300
XS04G0240800	413	424	-	7.80303	7.25e-05	0.228	CCAAATATCCCA	AT1G18330	MYB_related	MP00146	Arabidopsis_thaliana	DAP	PMID:27203113	AT1G18330
XS05G0102500	1732	1741	-	9.27273	7.28e-05	0.143	TGATATTTAT	AT5G02840	MYB_related	MP00484	Arabidopsis_thaliana	DAP	PMID:27203113	AT5G02840
XS10G0145900	1158	1167	+	9.27273	7.28e-05	0.143	TGATATTTAT	AT5G02840	MYB_related	MP00484	Arabidopsis_thaliana	DAP	PMID:27203113	AT5G02840
XS10G0145900	1582	1593	+	7.77273	7.31e-05	0.228	TCAAATATCCAA	AT1G18330	MYB_related	MP00146	Arabidopsis_thaliana	DAP	PMID:27203113	AT1G18330
XS02G0057600	616	625	-	11.2439	7.32e-05	0.888	TGTTAGGTTA	AT5G59780	MYB_related	MP00600	Arabidopsis_thaliana	PBM	PMID:24477691	MYB59
XS04G0003400	1564	1575	-	7.75758	7.33e-05	0.228	TATAATATCTTT	AT1G18330	MYB_related	MP00146	Arabidopsis_thaliana	DAP	PMID:27203113	AT1G18330
XS03G0296800	187	201	-	10.9211	7.35e-05	0.191	AAAATAGATAAAATG	AT3G10580	MYB_related	MP00344	Arabidopsis_thaliana	DAP	PMID:27203113	AT3G10580
XS04G0003400	901	915	+	10.9211	7.35e-05	0.191	TGAAAATATAAGGAT	AT3G10580	MYB_related	MP00344	Arabidopsis_thaliana	DAP	PMID:27203113	AT3G10580
XS02G0057700	489	499	+	9.98485	7.36e-05	0.154	AGATTTTTAAA	AT4G01280	MYB_related	MP00423	Arabidopsis_thaliana	DAP	PMID:27203113	AT4G01280
XS02G0057100	1794	1807	+	10.5455	7.43e-05	0.459	TAATAGATAAGACC	AT1G19000	MYB_related	MP00149	Arabidopsis_thaliana	DAP	PMID:27203113	AT1G19000
XS10G0145900	128	135	-	10.6066	7.48e-05	0.324	TAATATCT	AT2G46830	MYB_related	MP00103	Arabidopsis_thaliana	PBM	PMID:26531826	MA0972.1
XS02G0057700	422	429	-	10.6066	7.48e-05	0.324	TAATATCT	AT2G46830	MYB_related	MP00103	Arabidopsis_thaliana	PBM	PMID:26531826	MA0972.1
XS04G0003400	1566	1573	-	10.6066	7.48e-05	0.324	TAATATCT	AT2G46830	MYB_related	MP00103	Arabidopsis_thaliana	PBM	PMID:26531826	MA0972.1
XS10G0145900	1974	1981	-	10.6066	7.48e-05	0.324	TAATATCT	AT2G46830	MYB_related	MP00103	Arabidopsis_thaliana	PBM	PMID:26531826	MA0972.1
XS02G0057700	666	676	-	9.92424	7.51e-05	0.154	AGATTTTTAAG	AT4G01280	MYB_related	MP00423	Arabidopsis_thaliana	DAP	PMID:27203113	AT4G01280
XS11G0022900	398	411	-	10.5152	7.53e-05	0.459	TAAAGGATAAAAAA	AT1G19000	MYB_related	MP00149	Arabidopsis_thaliana	DAP	PMID:27203113	AT1G19000
XS02G0051900	1973	1983	+	9.90909	7.55e-05	0.154	GGATTTTTTTA	AT4G01280	MYB_related	MP00423	Arabidopsis_thaliana	DAP	PMID:27203113	AT4G01280
XS04G0003400	519	529	+	9.75758	7.56e-05	0.184	AGATTTTTATA	AT5G52660	MYB_related	MP00560	Arabidopsis_thaliana	DAP	PMID:27203113	AT5G52660
XS03G0296800	1362	1372	-	9.75758	7.56e-05	0.184	AGATTTTTATA	AT5G52660	MYB_related	MP00560	Arabidopsis_thaliana	DAP	PMID:27203113	AT5G52660
XS04G0003400	1917	1927	-	9.75758	7.56e-05	0.184	AGATTTTTATA	AT5G52660	MYB_related	MP00560	Arabidopsis_thaliana	DAP	PMID:27203113	AT5G52660
XS11G0022900	1077	1091	-	10.9242	7.59e-05	0.251	TTTAGGGATAAAATT	AT5G61620	MYB_related	MP00573	Arabidopsis_thaliana	DAP	PMID:27203113	AT5G61620
XS02G0057100	468	477	+	9.01515	7.61e-05	0.148	AGATAGTTTA	AT5G02840	MYB_related	MP00484	Arabidopsis_thaliana	DAP	PMID:27203113	AT5G02840
XS02G0057600	999	1009	+	9.84848	7.7e-05	0.154	GGATTTTTTTG	AT4G01280	MYB_related	MP00423	Arabidopsis_thaliana	DAP	PMID:27203113	AT4G01280
XS03G0296800	1420	1434	+	10.8939	7.71e-05	0.251	ATTATGGATTAGTAT	AT5G61620	MYB_related	MP00573	Arabidopsis_thaliana	DAP	PMID:27203113	AT5G61620
XS10G0145900	126	137	-	7.48485	7.72e-05	0.234	ATTAATATCTAG	AT1G18330	MYB_related	MP00146	Arabidopsis_thaliana	DAP	PMID:27203113	AT1G18330
XS11G0022900	1077	1091	+	10.5	7.86e-05	0.302	AATTTTATCCCTAAA	AT5G56840	MYB_related	MP00565	Arabidopsis_thaliana	DAP	PMID:27203113	AT5G56840
XS10G0145900	1016	1024	-	11.7	7.88e-05	1	TTTAGGTTT	AT1G49950	MYB_related	MP00607	Arabidopsis_thaliana	ChIP-seq	SRA:SRX1044956	SRX1044956
XS03G0261400	1233	1241	-	11.7	7.88e-05	1	TTTAGGTTT	AT1G49950	MYB_related	MP00607	Arabidopsis_thaliana	ChIP-seq	SRA:SRX1044956	SRX1044956
XS04G0003400	1520	1528	+	11.7	7.88e-05	1	TTTAGGTTT	AT1G49950	MYB_related	MP00607	Arabidopsis_thaliana	ChIP-seq	SRA:SRX1044956	SRX1044956
XS10G0145900	205	216	+	10.0152	7.95e-05	0.207	CGATATTTTCAA	AT3G09600	MYB_related	MP00338	Arabidopsis_thaliana	DAP	PMID:27203113	AT3G09600
XS04G0240800	413	427	-	10.7424	7.97e-05	0.232	GTCCCAAATATCCCA	AT3G10113	MYB_related	MP00341	Arabidopsis_thaliana	DAP	PMID:27203113	AT3G10113
XS04G0240800	1429	1443	+	10.7121	8.05e-05	0.233	AATATAAATATCGTG	AT3G10113	MYB_related	MP00341	Arabidopsis_thaliana	DAP	PMID:27203113	AT3G10113
XS04G0003400	1518	1532	-	7.11429	8.06e-05	0.615	ATTAAAACCTAAAAA	AT1G72740	MYB_related	MP00231	Arabidopsis_thaliana	DAP	PMID:27203113	AT1G72740
XS04G0240800	1827	1837	-	11.0455	8.09e-05	0.589	TTAGGATAAAA	AT1G74840	MYB_related	MP00236	Arabidopsis_thaliana	DAP	PMID:27203113	AT1G74840
XS10G0145900	203	217	-	10.6818	8.13e-05	0.234	ATTGAAAATATCGAT	AT3G10113	MYB_related	MP00341	Arabidopsis_thaliana	DAP	PMID:27203113	AT3G10113
XS11G0022900	1319	1329	+	11.0303	8.19e-05	0.589	AGTAGATAAGG	AT1G74840	MYB_related	MP00236	Arabidopsis_thaliana	DAP	PMID:27203113	AT1G74840
XS04G0003400	1299	1309	-	9.68182	8.19e-05	0.154	TGATTTTTTTT	AT4G01280	MYB_related	MP00423	Arabidopsis_thaliana	DAP	PMID:27203113	AT4G01280
XS10G0145900	1473	1483	-	9.68182	8.19e-05	0.154	TGATTTTTTTT	AT4G01280	MYB_related	MP00423	Arabidopsis_thaliana	DAP	PMID:27203113	AT4G01280
XS03G0261400	1698	1708	-	9.68182	8.19e-05	0.154	TGATTTTTTTT	AT4G01280	MYB_related	MP00423	Arabidopsis_thaliana	DAP	PMID:27203113	AT4G01280
XS10G0145900	1580	1593	+	10.5303	8.23e-05	0.204	ACTCAAATATCCAA	AT5G17300	MYB_related	MP00515	Arabidopsis_thaliana	DAP	PMID:27203113	AT5G17300
XS02G0057600	363	372	-	11.3673	8.29e-05	0.849	TGGGATAAGA	AT1G70000	MYB_related	MP00630	Arabidopsis_thaliana	PBM	PlantTFDB	transfer from PK17526.1(Cannabis sativa)
XS11G0022900	383	397	-	10.9091	8.36e-05	0.321	TAAAGATAATGGTTA	AT5G58900	MYB_related	MP00568	Arabidopsis_thaliana	DAP	PMID:27203113	AT5G58900
XS03G0261400	1062	1072	-	9.63636	8.42e-05	0.154	AGATTTTATTT	AT4G01280	MYB_related	MP00423	Arabidopsis_thaliana	DAP	PMID:27203113	AT4G01280
XS03G0296800	554	563	-	8.5303	8.43e-05	0.155	AGATATCTTT	AT5G02840	MYB_related	MP00484	Arabidopsis_thaliana	DAP	PMID:27203113	AT5G02840
XS04G0240800	1430	1441	-	9.81818	8.43e-05	0.213	CGATATTTATAT	AT3G09600	MYB_related	MP00338	Arabidopsis_thaliana	DAP	PMID:27203113	AT3G09600
XS03G0296800	187	200	-	10.2576	8.46e-05	0.468	AAATAGATAAAATG	AT1G19000	MYB_related	MP00149	Arabidopsis_thaliana	DAP	PMID:27203113	AT1G19000
XS02G0057700	882	903	+	10.8684	8.7e-05	0.379	ATGAAAAAACACCAACTGATTT	AT1G18960	MYB_related	MP00148	Arabidopsis_thaliana	DAP	PMID:27203113	AT1G18960
XS03G0261400	239	248	+	9.74242	8.85e-05	0.258	AGATAGTTTT	AT1G01060	MYB_related	MP00119	Arabidopsis_thaliana	DAP	PMID:27203113	AT1G01060
XS10G0145900	203	216	-	10.3182	8.89e-05	0.21	TTGAAAATATCGAT	AT5G17300	MYB_related	MP00515	Arabidopsis_thaliana	DAP	PMID:27203113	AT5G17300
XS04G0240800	1502	1511	+	8.39394	8.95e-05	0.155	ATATATTTTC	AT5G02840	MYB_related	MP00484	Arabidopsis_thaliana	DAP	PMID:27203113	AT5G02840
XS02G0057600	1127	1137	+	9.16667	8.98e-05	0.19	AGATTTTTCTT	AT5G52660	MYB_related	MP00560	Arabidopsis_thaliana	DAP	PMID:27203113	AT5G52660
XS04G0240800	1430	1443	+	10.2576	9.08e-05	0.212	ATATAAATATCGTG	AT5G17300	MYB_related	MP00515	Arabidopsis_thaliana	DAP	PMID:27203113	AT5G17300
XS02G0057600	361	375	-	10.5909	9.09e-05	0.26	TAATGGGATAAGAAA	AT5G61620	MYB_related	MP00573	Arabidopsis_thaliana	DAP	PMID:27203113	AT5G61620
XS10G0145900	1580	1591	-	9.62121	9.1e-05	0.217	GGATATTTGAGT	AT3G09600	MYB_related	MP00338	Arabidopsis_thaliana	DAP	PMID:27203113	AT3G09600
XS04G0240800	445	454	-	8.28788	9.15e-05	0.155	ATATATTTTG	AT5G02840	MYB_related	MP00484	Arabidopsis_thaliana	DAP	PMID:27203113	AT5G02840
XS03G0296800	1571	1580	-	8.28788	9.15e-05	0.155	ATATATTTTG	AT5G02840	MYB_related	MP00484	Arabidopsis_thaliana	DAP	PMID:27203113	AT5G02840
XS02G0057700	1965	1974	-	11.2857	9.17e-05	0.854	ATGGATATCG	AT1G70000	MYB_related	MP00630	Arabidopsis_thaliana	PBM	PlantTFDB	transfer from PK17526.1(Cannabis sativa)
XS11G0022900	1774	1788	-	10.4868	9.25e-05	0.192	GGAAGAGATAAGGAA	AT3G10580	MYB_related	MP00344	Arabidopsis_thaliana	DAP	PMID:27203113	AT3G10580
XS03G0296800	185	199	+	10.5606	9.39e-05	0.371	CTCATTTTATCTATT	AT5G47390	MYB_related	MP00551	Arabidopsis_thaliana	DAP	PMID:27203113	AT5G47390
XS04G0240800	245	255	-	9.15152	9.39e-05	0.159	TGATTTTTTTA	AT4G01280	MYB_related	MP00423	Arabidopsis_thaliana	DAP	PMID:27203113	AT4G01280
XS02G0057700	1139	1149	-	9.15152	9.39e-05	0.159	TGATTTTTTTA	AT4G01280	MYB_related	MP00423	Arabidopsis_thaliana	DAP	PMID:27203113	AT4G01280
XS02G0051900	1056	1065	-	8.18182	9.52e-05	0.157	AGATTTTTAC	AT5G02840	MYB_related	MP00484	Arabidopsis_thaliana	DAP	PMID:27203113	AT5G02840
XS02G0051900	1070	1079	+	8.18182	9.52e-05	0.157	AGATTTTTAC	AT5G02840	MYB_related	MP00484	Arabidopsis_thaliana	DAP	PMID:27203113	AT5G02840
XS03G0296800	189	199	-	10.7121	9.6e-05	0.589	AATAGATAAAA	AT1G74840	MYB_related	MP00236	Arabidopsis_thaliana	DAP	PMID:27203113	AT1G74840
XS02G0057600	51	58	+	10.3115	9.66e-05	0.352	AGATATCT	AT2G46830	MYB_related	MP00103	Arabidopsis_thaliana	PBM	PMID:26531826	MA0972.1
XS02G0057600	51	58	-	10.3115	9.66e-05	0.352	AGATATCT	AT2G46830	MYB_related	MP00103	Arabidopsis_thaliana	PBM	PMID:26531826	MA0972.1
XS03G0296800	556	563	+	10.3115	9.66e-05	0.352	AGATATCT	AT2G46830	MYB_related	MP00103	Arabidopsis_thaliana	PBM	PMID:26531826	MA0972.1
XS03G0296800	556	563	-	10.3115	9.66e-05	0.352	AGATATCT	AT2G46830	MYB_related	MP00103	Arabidopsis_thaliana	PBM	PMID:26531826	MA0972.1
XS02G0057100	1793	1807	+	10.4697	9.7e-05	0.264	TTAATAGATAAGACC	AT5G61620	MYB_related	MP00573	Arabidopsis_thaliana	DAP	PMID:27203113	AT5G61620
XS11G0022900	1099	1110	+	17.6667	1.51e-07	0.0342	AGATATTTTTTT	AT3G09600	MYB_related	MP00338	Arabidopsis_thaliana	DAP	PMID:27203113	AT3G09600
XS11G0022900	1099	1109	+	17.6061	5.49e-07	0.064	AGATATTTTTT	AT5G52660	MYB_related	MP00560	Arabidopsis_thaliana	DAP	PMID:27203113	AT5G52660
XS11G0022900	1099	1109	+	17.5606	5.49e-07	0.0611	AGATATTTTTT	AT4G01280	MYB_related	MP00423	Arabidopsis_thaliana	DAP	PMID:27203113	AT4G01280
XS11G0022900	1097	1111	-	16.6515	5.82e-07	0.0621	AAAAAAAATATCTTG	AT3G10113	MYB_related	MP00341	Arabidopsis_thaliana	DAP	PMID:27203113	AT3G10113
XS11G0022900	1097	1110	-	16.6667	5.91e-07	0.0503	AAAAAAATATCTTG	AT5G17300	MYB_related	MP00515	Arabidopsis_thaliana	DAP	PMID:27203113	AT5G17300
XS11G0022900	1097	1108	-	17.4394	9.2e-07	0.09	AAAAATATCTTG	AT1G18330	MYB_related	MP00146	Arabidopsis_thaliana	DAP	PMID:27203113	AT1G18330
XS10G0145900	600	621	-	16.0263	1.08e-06	0.0566	CAGATATCACAACAACAACAAC	AT1G18960	MYB_related	MP00148	Arabidopsis_thaliana	DAP	PMID:27203113	AT1G18960
XS04G0240800	1825	1839	-	15.8939	1.63e-06	0.15	ATTTAGGATAAAATT	AT5G61620	MYB_related	MP00573	Arabidopsis_thaliana	DAP	PMID:27203113	AT5G61620
XS02G0057100	1626	1644	-	16.3333	1.99e-06	0.109	AGAATCAAGCCCTAGTTTT	AT5G67580	MYB_related	MP00597	Arabidopsis_thaliana	DAP	PMID:27203113	AT5G67580
XS11G0022900	1099	1108	+	17.3485	2e-06	0.0949	AGATATTTTT	AT5G02840	MYB_related	MP00484	Arabidopsis_thaliana	DAP	PMID:27203113	AT5G02840
XS11G0022900	1099	1108	+	16.3182	2e-06	0.1	AGATATTTTT	AT1G01060	MYB_related	MP00119	Arabidopsis_thaliana	DAP	PMID:27203113	AT1G01060
XS05G0102500	728	737	+	14.1382	3.8e-06	0.872	AGTTAGGTAT	AT5G59780	MYB_related	MP00600	Arabidopsis_thaliana	PBM	PMID:24477691	MYB59
XS04G0240800	1825	1839	-	15.0263	4.11e-06	0.188	ATTTAGGATAAAATT	AT3G10580	MYB_related	MP00344	Arabidopsis_thaliana	DAP	PMID:27203113	AT3G10580
XS10G0145900	594	615	-	14.8421	4.72e-06	0.114	TCACAACAACAACAACCTCAAG	AT1G18960	MYB_related	MP00148	Arabidopsis_thaliana	DAP	PMID:27203113	AT1G18960
XS11G0022900	753	767	+	15.1667	4.94e-06	0.0984	AAAAAAAATATCCCA	AT3G10113	MYB_related	MP00341	Arabidopsis_thaliana	DAP	PMID:27203113	AT3G10113
XS10G0145900	597	618	-	14.5921	6.17e-06	0.13	ATATCACAACAACAACAACCTC	AT1G18960	MYB_related	MP00148	Arabidopsis_thaliana	DAP	PMID:27203113	AT1G18960
XS02G0057700	153	167	-	14.9545	6.21e-06	0.102	AAAAAAAATATCATC	AT3G10113	MYB_related	MP00341	Arabidopsis_thaliana	DAP	PMID:27203113	AT3G10113
XS02G0057100	1254	1268	+	14.0286	6.9e-06	0.253	CATCAACCCTAACTC	AT1G72740	MYB_related	MP00231	Arabidopsis_thaliana	DAP	PMID:27203113	AT1G72740
XS02G0057700	153	166	-	14.803	7.63e-06	0.111	AAAAAAATATCATC	AT5G17300	MYB_related	MP00515	Arabidopsis_thaliana	DAP	PMID:27203113	AT5G17300
XS04G0003400	1507	1525	-	14.6061	8.21e-06	0.183	CCTAAAAAACCCTAATAAT	AT5G67580	MYB_related	MP00597	Arabidopsis_thaliana	DAP	PMID:27203113	AT5G67580
XS11G0022900	1319	1333	+	14.2727	8.32e-06	0.316	AGTAGATAAGGTGGA	AT5G58900	MYB_related	MP00568	Arabidopsis_thaliana	DAP	PMID:27203113	AT5G58900
XS10G0145900	1156	1170	-	14.6515	8.42e-06	0.111	AATATAAATATCATA	AT3G10113	MYB_related	MP00341	Arabidopsis_thaliana	DAP	PMID:27203113	AT3G10113
XS02G0057700	155	166	+	14.5606	8.94e-06	0.124	TGATATTTTTTT	AT3G09600	MYB_related	MP00338	Arabidopsis_thaliana	DAP	PMID:27203113	AT3G09600
XS11G0022900	1317	1331	+	14.1316	9.09e-06	0.188	AAAGTAGATAAGGTG	AT3G10580	MYB_related	MP00344	Arabidopsis_thaliana	DAP	PMID:27203113	AT3G10580
XS04G0240800	1825	1839	+	14.0303	9.91e-06	0.269	AATTTTATCCTAAAT	AT5G56840	MYB_related	MP00565	Arabidopsis_thaliana	DAP	PMID:27203113	AT5G56840
XS11G0022900	755	765	-	14.3333	1.06e-05	0.143	GGATATTTTTT	AT5G52660	MYB_related	MP00560	Arabidopsis_thaliana	DAP	PMID:27203113	AT5G52660
XS11G0022900	754	765	-	14.2576	1.11e-05	0.134	GGATATTTTTTT	AT3G09600	MYB_related	MP00338	Arabidopsis_thaliana	DAP	PMID:27203113	AT3G09600
XS11G0022900	756	767	+	14.2121	1.18e-05	0.146	AAAAATATCCCA	AT1G18330	MYB_related	MP00146	Arabidopsis_thaliana	DAP	PMID:27203113	AT1G18330
XS10G0145900	1972	1985	-	14.2273	1.2e-05	0.12	ACAATAATATCTTC	AT5G17300	MYB_related	MP00515	Arabidopsis_thaliana	DAP	PMID:27203113	AT5G17300
XS02G0057100	1357	1364	-	14.2653	1.21e-05	1	CTAGGGCA	AT1G15720	MYB_related	MP00052	Arabidopsis_thaliana	PBM	PMID:25215497	M1316_1.02
XS11G0022900	755	765	-	13.9545	1.22e-05	0.101	GGATATTTTTT	AT4G01280	MYB_related	MP00423	Arabidopsis_thaliana	DAP	PMID:27203113	AT4G01280
XS10G0145900	1156	1169	-	14.0455	1.36e-05	0.123	ATATAAATATCATA	AT5G17300	MYB_related	MP00515	Arabidopsis_thaliana	DAP	PMID:27203113	AT5G17300
XS11G0022900	754	767	+	13.9848	1.43e-05	0.124	AAAAAAATATCCCA	AT5G17300	MYB_related	MP00515	Arabidopsis_thaliana	DAP	PMID:27203113	AT5G17300
XS10G0145900	1974	1985	+	13.803	1.5e-05	0.137	AGATATTATTGT	AT3G09600	MYB_related	MP00338	Arabidopsis_thaliana	DAP	PMID:27203113	AT3G09600
XS04G0003400	1508	1522	-	11.9286	1.65e-05	0.337	AAAAAACCCTAATAA	AT1G72740	MYB_related	MP00231	Arabidopsis_thaliana	DAP	PMID:27203113	AT1G72740
XS02G0057700	155	165	+	13.4394	1.73e-05	0.144	TGATATTTTTT	AT5G52660	MYB_related	MP00560	Arabidopsis_thaliana	DAP	PMID:27203113	AT5G52660
XS11G0022900	1317	1331	-	13.1515	1.77e-05	0.272	CACCTTATCTACTTT	AT5G56840	MYB_related	MP00565	Arabidopsis_thaliana	DAP	PMID:27203113	AT5G56840
XS10G0145900	1974	1984	+	13.4091	1.77e-05	0.144	AGATATTATTG	AT5G52660	MYB_related	MP00560	Arabidopsis_thaliana	DAP	PMID:27203113	AT5G52660
XS11G0022900	756	765	-	13.1818	1.78e-05	0.134	GGATATTTTT	AT5G02840	MYB_related	MP00484	Arabidopsis_thaliana	DAP	PMID:27203113	AT5G02840
XS04G0003400	1971	1989	+	13.2424	1.89e-05	0.256	TGAATACAACCCTAATTTT	AT5G67580	MYB_related	MP00597	Arabidopsis_thaliana	DAP	PMID:27203113	AT5G67580
XS02G0057700	153	164	-	12.7879	1.93e-05	0.158	AAAAATATCATC	AT1G18330	MYB_related	MP00146	Arabidopsis_thaliana	DAP	PMID:27203113	AT1G18330
XS02G0057600	359	373	-	13.2121	1.96e-05	0.32	ATGGGATAAGAAATT	AT5G58900	MYB_related	MP00568	Arabidopsis_thaliana	DAP	PMID:27203113	AT5G58900
XS10G0145900	1498	1508	-	13.2576	1.99e-05	0.12	AGATTTTTTTC	AT4G01280	MYB_related	MP00423	Arabidopsis_thaliana	DAP	PMID:27203113	AT4G01280
[truncated: 507 more rows]

## Sheet: Supplementary Table 10
Supplementary Table 10. Statistics of the transcription factor annotated in yellowhorn.
[truncated: 1,240 more rows]
